# Supplementary material for: Bioinformatics Analysis of Transcriptomic Data Reveals Refined Functional Networks for the Self-Renewal of Mouse Spermatogonial Stem Cells
Source: Stem Cells Int. 2018 Jul 8;2018:5842714. doi: 10.1155/2018/5842714 (PMC6079398; doi:10.1155/2018/5842714)
Supplement: Supplementary Materials — Supplementary data 1: detailed list for gene expression and annotation. Supplementary data 2: detailed results of dynamic screening of candidate genes. Supplementary data 3: detailed information for the refined network. Supplementary data 4: detailed results of functional enrichment analyses. [file 5842714.f1.zip]

Archive with 4 entries (4 files):
- Supplementary data 1.xlsx
- Supplementary data 2.xlsx
- Supplementary data 3.xlsx
- Supplementary data 4.xlsx
