# Supplementary material for: Bioinformatics Analysis of Transcriptomic Data Reveals Refined Functional Networks for the Self-Renewal of Mouse Spermatogonial Stem Cells
Source: Stem Cells Int. 2018 Jul 8;2018:5842714. doi: 10.1155/2018/5842714 (PMC6079398; doi:10.1155/2018/5842714)
Supplement: Supplementary Materials — Supplementary data 1: detailed list for gene expression and annotation. Supplementary data 2: detailed results of dynamic screening of candidate genes. Supplementary data 3: detailed information for the refined network. Supplementary data 4: detailed results of functional enrichment analyses. [file 5842714.f1.zip › Supplementary data 1.xlsx]

## Sheet: Sheet1
Gene symbol	Ensembl gene ID	priSG-A	SG-A	Average	Average change percentage	Average percentile rank	Expression index	Fold change	Change trend	MGI ID	Cell proliferation or differentiation	Male fertility association	Canonical markers
0610007P14Rik	ENSMUSG00000021252	14.5893	16.6098	15.5996	0.129523	0.638	0.0826357	-1.13849	Down	MGI:1915571
0610009B22Rik	ENSMUSG00000007777	10.5086	17.0203	13.7645	0.473081	0.604	0.285741	-1.61965	Down	MGI:1913300
0610009O20Rik	ENSMUSG00000024442	21.1741	15.3285	18.2513	0.320284	0.677	0.216832	1.38135	Up	MGI:1914089
0610010F05Rik	ENSMUSG00000042208	8.32802	13.9403	11.1342	0.50406	0.551	0.277737	-1.6739	Down	MGI:1918925
0610010K14Rik	ENSMUSG00000020831	75.6323	67.6527	71.6425	0.111381	0.98	0.109153	1.11795	Up	MGI:1915609
0610030E20Rik	ENSMUSG00000108680	6.90133	8.27815	7.58974	0.181405	0.469	0.0850791	-1.1995	Down
0610037L13Rik	ENSMUSG00000028608	41.7317	39.705	40.7184	0.0497736	0.9	0.0447963	1.05104	Up	MGI:1921348
0610040J01Rik	ENSMUSG00000060512	0.320549	0.139842	0.230195	0.785015	0.118	0.0926318	2.29222	Up	MGI:1923511
1110004E09Rik	ENSMUSG00000022972	17.7599	21.3464	19.5531	0.183423	0.697	0.127846	-1.20194	Down	MGI:1915251
1110008F13Rik	ENSMUSG00000027637	45.0014	55.2257	50.1136	0.204023	0.94	0.191781	-1.2272	Down	MGI:1914638
1110008L16Rik	ENSMUSG00000021023	10.1389	9.33789	9.7384	0.0822528	0.519	0.0426892	1.08578	Up	MGI:1913382
1110008P14Rik	ENSMUSG00000039195	69.0084	41.0528	55.0306	0.508001	0.954	0.484633	1.68097	Up	MGI:1920987
1110012L19Rik	ENSMUSG00000045237	12.1499	10.0959	11.1229	0.184664	0.55	0.101565	1.20345	Up	MGI:1915868
1110032A03Rik	ENSMUSG00000037971	8.31888	7.45758	7.88823	0.109188	0.476	0.0519735	1.11549	Up	MGI:1915971
1110032F04Rik	ENSMUSG00000046999	1.61148	1.02733	1.31941	0.442737	0.263	0.11644	1.56861	Up	MGI:1915975
1110034G24Rik	ENSMUSG00000044991	5.63306	4.41284	5.02295	0.242929	0.404	0.0981433	1.27652	Up	MGI:1920997
1110037F02Rik	ENSMUSG00000040720	22.1427	25.7888	23.9657	0.152138	0.756	0.115016	-1.16466	Down	MGI:1913435
1110038F14Rik	ENSMUSG00000063236	25.4144	24.407	24.9107	0.0404405	0.769	0.0310987	1.04128	Up	MGI:2152337
1110059E24Rik	ENSMUSG00000035171	21.473	26.3607	23.9169	0.204362	0.756	0.154498	-1.22762	Down	MGI:1913456
1110059G10Rik	ENSMUSG00000032551	2.63689	3.78769	3.21229	0.358249	0.349	0.125029	-1.43642	Down	MGI:1913452
1190002N15Rik	ENSMUSG00000045414	14.5067	15.9885	15.2476	0.0971825	0.631	0.0613222	-1.10215	Down	MGI:1916111	cell proliferation
1190007I07Rik	ENSMUSG00000063320	5.79314	4.55206	5.1726	0.239933	0.408	0.0978929	1.27264	Up	MGI:3698433
1300017J02Rik	ENSMUSG00000033688	1.2688	1.15952	1.21416	0.0900046	0.256	0.0230412	1.09425	Up	MGI:1919025
1500009C09Rik	ENSMUSG00000068099	0	0.315564	0.157782	2	0.087	0.174	0	Down	MGI:1923755
1500009L16Rik	ENSMUSG00000087651	17.8142	22.2195	20.0168	0.22008	0.705	0.155156	-1.24729	Down	MGI:1917034
1500011B03Rik	ENSMUSG00000072694	42.3751	53.0749	47.725	0.224197	0.933	0.209176	-1.2525	Down	MGI:1913486
1500011K16Rik	ENSMUSG00000051319	6.62394	9.6073	8.11562	0.367607	0.481	0.176819	-1.45039	Down	MGI:1915135
1500015O10Rik	ENSMUSG00000026051	1.13934	1.52894	1.33414	0.292023	0.264	0.0770942	-1.34195	Down	MGI:1926146
1600002H07Rik	ENSMUSG00000024118	17.0789	13.5604	15.3196	0.229672	0.633	0.145383	1.25947	Up	MGI:1919266
1600014C10Rik	ENSMUSG00000054676	4.51777	4.59949	4.55863	0.0179264	0.391	0.00700924	-1.01809	Down	MGI:1919494
1600014C23Rik	ENSMUSG00000094690	0.262239	0.244202	0.253221	0.0712304	0.126	0.00897503	1.07386	Up	MGI:1919490
1700001C19Rik	ENSMUSG00000047150	6.88414	6.23664	6.56039	0.0986984	0.443	0.0437234	1.10382	Up	MGI:1922712
1700001J03Rik	ENSMUSG00000095040	0.274942	0	0.137471	2	0.074	0.148	0	Up	MGI:1916532
1700001L19Rik	ENSMUSG00000021534	1.23457	1.20376	1.21916	0.0252714	0.256	0.00646948	1.02559	Up	MGI:1916565
1700001O22Rik	ENSMUSG00000044320	1.8045	1.45317	1.62884	0.215694	0.281	0.06061	1.24177	Up	MGI:1923631
1700003F12Rik	ENSMUSG00000038523	13.0586	8.30578	10.6822	0.444929	0.54	0.240262	1.57223	Up	MGI:1922730
1700003H04Rik	ENSMUSG00000039174	0	0.180563	0.0902815	2	0.039	0.078	0	Down	MGI:1923637
1700006E09Rik	ENSMUSG00000010841	0.351275	0.173103	0.262189	0.679556	0.129	0.0876627	2.02928	Up	MGI:1922687
1700007B14Rik	ENSMUSG00000031620	0	0.134892	0.067446	2	0.017	0.034	0	Down	MGI:1919081
1700007G11Rik	ENSMUSG00000057816	1.03941	1.89286	1.46613	0.582109	0.271	0.157751	-1.82109	Down	MGI:1916571
1700007K09Rik	ENSMUSG00000030858	0.25822	0.180175	0.219197	0.356049	0.114	0.0405896	1.43316	Up	MGI:1916568
1700007K13Rik	ENSMUSG00000026831	3.06558	1.59462	2.3301	0.631286	0.316	0.199486	1.92245	Up	MGI:1916577
1700008O03Rik	ENSMUSG00000008028	1.77074	0.715479	1.24311	0.848888	0.258	0.219013	2.4749	Up	MGI:1916599
1700008P02Rik	ENSMUSG00000069118	0	0.230535	0.115267	2	0.059	0.118	0	Down	MGI:1916597
1700009N14Rik	ENSMUSG00000028287	0	0.430703	0.215352	2	0.112	0.224	0	Down	MGI:1922721
1700010B08Rik	ENSMUSG00000057047	0.505987	0.379672	0.442829	0.285245	0.173	0.0493474	1.3327	Up	MGI:1922735
1700010D01Rik	ENSMUSG00000071721	0.938863	0.508237	0.72355	0.595157	0.212	0.126173	1.84729	Up	MGI:1923636
1700010I14Rik	ENSMUSG00000023873	0.738234	1.31718	1.02771	0.563338	0.243	0.136891	-1.78423	Down	MGI:1914181
1700011L22Rik	ENSMUSG00000031682	0.221302	0.121117	0.17121	0.58516	0.093	0.0544199	1.82718	Up	MGI:1914937
1700012A03Rik	ENSMUSG00000029766	0	1.11406	0.55703	2	0.191	0.382	0	Down	MGI:1923632
1700012B07Rik	ENSMUSG00000020617	8.00857	3.86955	5.93906	0.696915	0.426	0.296886	2.06964	Up	MGI:1916574
1700012B09Rik	ENSMUSG00000031927	0.102906	0.368324	0.235615	1.12649	0.12	0.135179	-3.57923	Down	MGI:1916575
1700013D24Rik	ENSMUSG00000079346	0	0.40094	0.20047	2	0.106	0.212	0	Down	MGI:1924171
1700013F07Rik	ENSMUSG00000027886	1.99096	0.443384	1.21717	1.27145	0.256	0.325492	4.49037	Up	MGI:1922754
1700013G24Rik	ENSMUSG00000041399	0	0.431421	0.21571	2	0.112	0.224	0	Down	MGI:1916630
1700013H16Rik	ENSMUSG00000054727	11.3747	25.4288	18.4017	0.763737	0.679	0.518578	-2.23556	Down	MGI:1922764
1700015E13Rik	ENSMUSG00000042800	0.194489	0.373088	0.283788	0.629338	0.135	0.0849607	-1.9183	Down	MGI:1924175	cell differentiation
1700015G11Rik	ENSMUSG00000094445	1.51604	1.59096	1.5535	0.0482266	0.277	0.0133588	-1.04942	Down	MGI:1922779
1700016D06Rik	ENSMUSG00000031509	0.614034	0.867021	0.740528	0.341631	0.214	0.073109	-1.41201	Down	MGI:1923663
1700016H13Rik	ENSMUSG00000029320	0.431626	0.494471	0.463048	0.13572	0.176	0.0238867	-1.1456	Down	MGI:1921468
1700016K19Rik	ENSMUSG00000053783	11.4764	7.92355	9.69998	0.366274	0.518	0.18973	1.44839	Up	MGI:1921480
1700017B05Rik	ENSMUSG00000032300	41.1808	34.725	37.9529	0.1701	0.883	0.150199	1.18591	Up	MGI:1921461
1700017D01Rik	ENSMUSG00000024729	0.610931	0.627938	0.619434	0.0274557	0.199	0.00546368	-1.02784	Down	MGI:1916619
1700017N19Rik	ENSMUSG00000056912	0	0.131134	0.065567	2	0.015	0.03	0	Down	MGI:1913855
1700018B08Rik	ENSMUSG00000031809	0.185561	0.852931	0.519246	1.28527	0.184	0.236489	-4.5965	Down	MGI:1923655
1700018C11Rik	ENSMUSG00000058935	0	0.373032	0.186516	2	0.101	0.202	0	Down	MGI:1922774
1700019A02Rik	ENSMUSG00000060715	0.671536	0.675838	0.673687	0.00638575	0.206	0.00131547	-1.00641	Down	MGI:1916647
1700019B03Rik	ENSMUSG00000040340	0.319626	0.207821	0.263723	0.423948	0.129	0.0546893	1.53799	Up	MGI:1923656
1700019D03Rik	ENSMUSG00000043629	0.219566	0.443421	0.331493	0.675292	0.15	0.101294	-2.01953	Down	MGI:1914330
1700019M22Rik	ENSMUSG00000059695	0	0.625805	0.312902	2	0.145	0.29	0	Down	MGI:1916673
1700019N19Rik	ENSMUSG00000026931	0.0830233	0.16785	0.125437	0.676251	0.066	0.0446326	-2.02172	Down	MGI:1914757
1700019O17Rik	ENSMUSG00000036574	0.0604538	0.235581	0.148017	1.18315	0.081	0.0958354	-3.89688	Down	MGI:1919113
1700020A23Rik	ENSMUSG00000027409	0.394052	0.312898	0.353475	0.229589	0.154	0.0353567	1.25936	Up	MGI:1922906
1700020D05Rik	ENSMUSG00000100937	1.35878	1.6807	1.51974	0.211826	0.275	0.0582521	-1.23692	Down	MGI:1922805
1700020L24Rik	ENSMUSG00000035085	0.414351	0.297055	0.355703	0.329758	0.154	0.0507828	1.39486	Up	MGI:1913580
1700020N01Rik	ENSMUSG00000050844	2.82207	3.84359	3.33283	0.306502	0.355	0.108808	-1.36198	Down	MGI:1914942
1700021F05Rik	ENSMUSG00000019797	18.9011	10.8167	14.8589	0.544078	0.624	0.339505	1.7474	Up	MGI:1915101
1700021F07Rik	ENSMUSG00000027518	1.05277	0.0317799	0.542275	1.88279	0.188	0.353965	33.1269	Up	MGI:1919471
1700024G13Rik	ENSMUSG00000072473	0.897438	0.329224	0.613331	0.926439	0.198	0.183435	2.72592	Up	MGI:1914335
1700024P04Rik	ENSMUSG00000045022	0	0.643409	0.321705	2	0.147	0.294	0	Down	MGI:1916632
1700024P16Rik	ENSMUSG00000078612	2.12685	7.0237	4.57527	1.07029	0.392	0.419552	-3.3024	Down	MGI:2685466
1700028J19Rik	ENSMUSG00000038782	0.332989	0.72534	0.529165	0.741454	0.186	0.13791	-2.17827	Down	MGI:1917254
1700028K03Rik	ENSMUSG00000089798	0.857552	2.12147	1.48951	0.848546	0.273	0.231653	-2.47387	Down	MGI:1923671
1700028P14Rik	ENSMUSG00000033053	0.327121	0.332811	0.329966	0.0172442	0.149	0.00256939	-1.01739	Down	MGI:1914733
1700029F12Rik	ENSMUSG00000052075	0.182835	0.262754	0.222795	0.358712	0.115	0.0412518	-1.43711	Down	MGI:1913729
1700029H14Rik	ENSMUSG00000031452	0.111918	0.545222	0.32857	1.31876	0.149	0.196495	-4.87162	Down	MGI:1913751
1700029J07Rik	ENSMUSG00000071103	3.51489	3.15259	3.33374	0.108677	0.355	0.0385802	1.11492	Up	MGI:1916729
1700029P11Rik	ENSMUSG00000061633	3.54766	2.31821	2.93294	0.419188	0.34	0.142524	1.53034	Up	MGI:1913596
1700030J22Rik	ENSMUSG00000031847	9.22609	5.78352	7.5048	0.458715	0.468	0.214679	1.59524	Up	MGI:1916778
1700031F05Rik	ENSMUSG00000032894	1.24055	1.28434	1.26245	0.0346867	0.259	0.00898384	-1.0353	Down	MGI:1920550
1700031M16Rik	ENSMUSG00000099353	0	0.101793	0.0508965	2	0	0	0	Down	MGI:1920552
1700034I23Rik	ENSMUSG00000074619	0.0627162	0.264923	0.16382	1.23433	0.09	0.111089	-4.22416	Down	MGI:1920547
1700034J05Rik	ENSMUSG00000040163	0.0245728	0.102978	0.0637754	1.2294	0.013	0.0159821	-4.19073	Down	MGI:1920594
1700034O15Rik	ENSMUSG00000029867	0.182534	0.151899	0.167216	0.183206	0.092	0.0168549	1.20168	Up	MGI:1923856
1700037C18Rik	ENSMUSG00000005983	1.24616	0.937609	1.09188	0.282586	0.248	0.0700813	1.32908	Up	MGI:1920511
1700037H04Rik	ENSMUSG00000027327	36.4439	39.2938	37.8688	0.0752571	0.882	0.0663768	-1.0782	Down	MGI:1914576
1700040L02Rik	ENSMUSG00000019945	7.213	8.24651	7.72976	0.133705	0.473	0.0632427	-1.14328	Down	MGI:1920537
1700042G07Rik	ENSMUSG00000078593	0.350608	0.555051	0.452829	0.451479	0.174	0.0785573	-1.58311	Down	MGI:1914573
1700047I17Rik2	ENSMUSG00000094103	2.4588	3.60946	3.03413	0.379239	0.344	0.130458	-1.46798	Down	MGI:3714351
1700057G04Rik	ENSMUSG00000074139	3.23397	1.33966	2.28681	0.828362	0.314	0.260106	2.41402	Up	MGI:1925709
1700061G19Rik	ENSMUSG00000024209	0.982626	0.945742	0.964184	0.0382541	0.237	0.00906622	1.039	Up	MGI:1925875
1700066M21Rik	ENSMUSG00000038323	6.45765	9.4053	7.93148	0.37164	0.477	0.177272	-1.45646	Down	MGI:1920717
1700067K01Rik	ENSMUSG00000046408	4.3085	3.83607	4.07228	0.116011	0.376	0.0436201	1.12315	Up	MGI:1920703
1700069L16Rik	ENSMUSG00000042184	2.72509	1.67302	2.19905	0.478419	0.311	0.148788	1.62884	Up	MGI:1920726
1700071K01Rik	ENSMUSG00000080980	0	0.159296	0.079648	2	0.03	0.06	0	Down	MGI:3588264
1700080E11Rik	ENSMUSG00000032566	0	0.322841	0.16142	2	0.089	0.178	0	Down	MGI:1920782
1700080O16Rik	ENSMUSG00000031118	2.14553	1.63599	1.89076	0.26949	0.296	0.0797689	1.31146	Up	MGI:1921529
1700093K21Rik	ENSMUSG00000020286	0.339109	0.420379	0.379744	0.214013	0.16	0.034242	-1.23966	Down	MGI:1914608
1700102P08Rik	ENSMUSG00000032611	0.673694	0.706032	0.689863	0.046876	0.208	0.0097502	-1.048	Down	MGI:2148248
1700112E06Rik	ENSMUSG00000063458	0.361394	0	0.180697	2	0.098	0.196	0	Up	MGI:1923883	cell differentiation
1700113H08Rik	ENSMUSG00000047129	0.44064	0.313277	0.376958	0.337872	0.159	0.0537216	1.40655	Up	MGI:1923890
1700123L14Rik	ENSMUSG00000072878	0	0.290409	0.145204	2	0.079	0.158	0	Down	MGI:1925732
1700125H20Rik	ENSMUSG00000018479	5.66294	6.575	6.11897	0.149054	0.432	0.0643915	-1.16106	Down	MGI:1920884
1700129C05Rik	ENSMUSG00000021977	0	0.633369	0.316684	2	0.146	0.292	0	Down	MGI:1915182
1810009A15Rik	ENSMUSG00000071653	16.7212	13.6497	15.1854	0.202266	0.63	0.127428	1.22502	Up	MGI:1913526
1810010D01Rik	ENSMUSG00000109305	0.134851	0	0.0674255	2	0.017	0.034	0	Up	MGI:1916283
1810010H24Rik	ENSMUSG00000078607	1.24441	0.747784	0.996097	0.498572	0.24	0.119657	1.66413	Up	MGI:1916316
1810011O10Rik	ENSMUSG00000056313	0.213431	0.268239	0.240835	0.227575	0.122	0.0277641	-1.25679	Down	MGI:1916318
1810013L24Rik	ENSMUSG00000022507	16.4907	24.5314	20.5111	0.392018	0.712	0.279117	-1.48759	Down	MGI:1916303
1810024B03Rik	ENSMUSG00000044145	6.37074	4.91506	5.6429	0.257967	0.419	0.108088	1.29617	Up	MGI:1925560
1810032O08Rik	ENSMUSG00000020812	9.49345	12.8978	11.1956	0.304079	0.552	0.167851	-1.3586	Down	MGI:1913543
1810037I17Rik	ENSMUSG00000054091	39.7402	47.0286	43.3844	0.167996	0.913	0.15338	-1.1834	Down	MGI:1914954
1810041L15Rik	ENSMUSG00000062760	1.95277	2.04586	1.99931	0.0465609	0.301	0.0140148	-1.04767	Down	MGI:1919551
1810043G02Rik	ENSMUSG00000020284	5.90188	6.38733	6.14461	0.0790043	0.432	0.0341298	-1.08225	Down	MGI:1915134
1810046K07Rik	ENSMUSG00000036027	0	0.180323	0.0901615	2	0.039	0.078	0	Down	MGI:1917059
1810055G02Rik	ENSMUSG00000035372	16.2513	12.3087	14.28	0.276092	0.613	0.169245	1.32031	Up	MGI:1919306
1810062G17Rik	ENSMUSG00000027713	0.205283	0.328904	0.267093	0.462838	0.13	0.0601689	-1.6022	Down	MGI:1919532
1810065E05Rik	ENSMUSG00000013653	0.140791	0	0.0703955	2	0.02	0.04	0	Up	MGI:1917114
2010003K11Rik	ENSMUSG00000042041	0.685151	0.563967	0.624559	0.194031	0.199	0.0386122	1.21488	Up	MGI:1917111
2010005H15Rik	ENSMUSG00000095620	0.247124	0.634239	0.440682	0.878446	0.172	0.151093	-2.56648	Down	MGI:1924020
2010107E04Rik	ENSMUSG00000021290	43.0381	61.9758	52.507	0.36067	0.947	0.341555	-1.44002	Down	MGI:1917507
2010107G23Rik	ENSMUSG00000020083	18.3019	14.2362	16.2691	0.249904	0.647	0.161688	1.28559	Up	MGI:1917144
2010109I03Rik	ENSMUSG00000063522	0.0990524	0.0891283	0.0940903	0.105474	0.043	0.00453539	1.11135	Up	MGI:1914288
2010111I01Rik	ENSMUSG00000021458	4.85285	4.831	4.84192	0.00451267	0.399	0.00180055	1.00452	Up	MGI:1919311
2010300C02Rik	ENSMUSG00000026090	12.3149	6.74655	9.53073	0.584253	0.515	0.30089	1.82536	Up	MGI:1919347
2200002D01Rik	ENSMUSG00000030587	1.26546	0.98165	1.12356	0.2526	0.25	0.06315	1.28912	Up	MGI:1919525
2210010C04Rik	ENSMUSG00000029882	0.286143	0.335001	0.310572	0.157316	0.144	0.0226535	-1.17075	Down	MGI:1914623
2210013O21Rik	ENSMUSG00000086316	14.6495	14.7192	14.6844	0.00474655	0.62	0.00294286	-1.00476	Down	MGI:1917373
2210016F16Rik	ENSMUSG00000021550	14.6469	14.6644	14.6557	0.00119408	0.62	0.000740329	-1.00119	Down	MGI:1917403
2210016L21Rik	ENSMUSG00000029559	14.1362	12.3312	13.2337	0.136394	0.593	0.0808818	1.14638	Up	MGI:1919607
2210408I21Rik	ENSMUSG00000071252	2.91741	4.12215	3.51978	0.342277	0.359	0.122877	-1.41295	Down	MGI:1919621
2300009A05Rik	ENSMUSG00000032403	10.0413	14.0392	12.0403	0.332045	0.571	0.189597	-1.39815	Down	MGI:1916728
2310009B15Rik	ENSMUSG00000079283	10.2348	8.61629	9.42554	0.171715	0.512	0.0879182	1.18784	Up	MGI:1916799
2310022A10Rik	ENSMUSG00000049643	17.1424	11.6366	14.3895	0.382626	0.615	0.235315	1.47315	Up	MGI:1913617
2310030G06Rik	ENSMUSG00000032062	5.44723	3.62565	4.53644	0.401544	0.39	0.156602	1.50241	Up	MGI:1914202
2310033P09Rik	ENSMUSG00000020441	27.3752	21.8903	24.6328	0.222667	0.766	0.170563	1.25056	Up	MGI:1915112
2310034G01Rik	ENSMUSG00000099655	2.09265	1.4555	1.77407	0.359145	0.289	0.103793	1.43775	Up	MGI:1922829
2310035C23Rik	ENSMUSG00000026319	19.3135	27.435	23.3742	0.347455	0.749	0.260244	-1.42051	Down	MGI:1922832
2310036O22Rik	ENSMUSG00000041203	40.8741	42.0294	41.4518	0.027871	0.903	0.0251675	-1.02826	Down	MGI:1922833
2310039H08Rik	ENSMUSG00000062619	10.8097	7.38399	9.09685	0.376584	0.504	0.189798	1.46394	Up	MGI:1914351
2310050C09Rik	ENSMUSG00000090314	0.120265	0	0.0601325	2	0.009	0.018	0	Up	MGI:1913783	cell differentiation
2310061I04Rik	ENSMUSG00000050705	47.407	44.7003	46.0536	0.0587728	0.925	0.0543648	1.06055	Up	MGI:1916912
2310079G19Rik	ENSMUSG00000045331	0.136415	0	0.0682075	2	0.018	0.036	0	Up	MGI:1916949
2410002F23Rik	ENSMUSG00000045411	42.5271	46.6414	44.5842	0.0922815	0.918	0.0847144	-1.09675	Down	MGI:1914226
2410004B18Rik	ENSMUSG00000036873	24.1398	21.6284	22.8841	0.109744	0.742	0.0814303	1.11612	Up	MGI:1913671
2410004P03Rik	ENSMUSG00000071398	0.443829	0.630042	0.536936	0.346807	0.187	0.0648529	-1.41956	Down	MGI:1920917
2410015M20Rik	ENSMUSG00000049760	18.8451	20.508	19.6765	0.0845118	0.7	0.0591582	-1.08824	Down	MGI:2442174
2410016O06Rik	ENSMUSG00000046791	15.8279	13.7206	14.7742	0.142633	0.622	0.0887179	1.15359	Up	MGI:1919202	cell differentiation
2410131K14Rik	ENSMUSG00000032840	10.8837	9.24322	10.0635	0.163014	0.528	0.0860711	1.17748	Up	MGI:1924042
2410141K09Rik	ENSMUSG00000074832	0.903179	1.23486	1.06902	0.310267	0.246	0.0763256	-1.36724	Down	MGI:1924053
2510002D24Rik	ENSMUSG00000071632	2.70666	3.77149	3.23907	0.328745	0.35	0.115061	-1.39341	Down	MGI:1919557
2510009E07Rik	ENSMUSG00000043391	1.55692	1.20424	1.38058	0.255458	0.267	0.0682072	1.29287	Up	MGI:1919440
2510039O18Rik	ENSMUSG00000044496	46.8482	42.4874	44.6678	0.0976274	0.918	0.0896219	1.10264	Up	MGI:1924284
2610001J05Rik	ENSMUSG00000052419	3.32034	3.72276	3.52155	0.114274	0.359	0.0410242	-1.1212	Down	MGI:1913770
2610008E11Rik	ENSMUSG00000060301	4.9025	6.64281	5.77266	0.301475	0.422	0.127222	-1.35498	Down	MGI:1919378
2610020H08Rik	ENSMUSG00000030924	8.1209	11.4652	9.79305	0.341497	0.521	0.17792	-1.41181	Down	MGI:1919402
2610028H24Rik	ENSMUSG00000009114	0.233177	0.443351	0.338264	0.621331	0.151	0.093821	-1.90135	Down	MGI:1924214
2610301B20Rik	ENSMUSG00000059482	7.57334	9.31015	8.44175	0.205741	0.488	0.100401	-1.22933	Down	MGI:1914407
2610507B11Rik	ENSMUSG00000010277	64.6421	66.4358	65.5389	0.0273685	0.972	0.0266021	-1.02775	Down	MGI:1919753
2610524H06Rik	ENSMUSG00000092486	21.3247	23.6144	22.4695	0.101902	0.738	0.0752039	-1.10737	Down	MGI:2447819
2610528A11Rik	ENSMUSG00000096001	0.266399	0.11982	0.193109	0.759046	0.104	0.0789408	2.22333	Up	MGI:1917295
2610528J11Rik	ENSMUSG00000028536	0.142504	0	0.071252	2	0.021	0.042	0	Up	MGI:1913701
2700060E02Rik	ENSMUSG00000021807	5.2891	7.92206	6.60558	0.398596	0.444	0.176977	-1.49781	Down	MGI:1915295
2700062C07Rik	ENSMUSG00000024273	11.8465	11.2881	11.5673	0.048274	0.56	0.0270334	1.04947	Up	MGI:1915296
2700081O15Rik	ENSMUSG00000053080	6.26057	4.36953	5.31505	0.35579	0.411	0.14623	1.43278	Up	MGI:1919667
2700094K13Rik	ENSMUSG00000076437	60.4302	61.5308	60.9805	0.0180484	0.966	0.0174347	-1.01821	Down	MGI:1919907
2700097O09Rik	ENSMUSG00000062198	3.49162	6.04719	4.7694	0.535826	0.397	0.212723	-1.73192	Down	MGI:1919908
2810004N23Rik	ENSMUSG00000031984	8.75786	9.42619	9.09202	0.0735073	0.504	0.0370477	-1.07631	Down	MGI:1913773
2810021J22Rik	ENSMUSG00000020491	7.35676	9.17113	8.26394	0.219553	0.484	0.106263	-1.24663	Down	MGI:1917194
2810403A07Rik	ENSMUSG00000028060	27.6368	29.462	28.5494	0.0639313	0.806	0.0515286	-1.06604	Down	MGI:1921450
2810408A11Rik	ENSMUSG00000018570	4.45571	5.04625	4.75098	0.124299	0.396	0.0492222	-1.13254	Down	MGI:1917669
2810428I15Rik	ENSMUSG00000058833	52.5602	60.5228	56.5415	0.140828	0.957	0.134772	-1.15149	Down	MGI:1913712
2810459M11Rik	ENSMUSG00000026227	1.28178	0.673266	0.977523	0.622506	0.238	0.148156	1.90382	Up	MGI:1920042
2810474O19Rik	ENSMUSG00000032712	10.7161	13.1904	11.9533	0.206998	0.568	0.117575	-1.2309	Down	MGI:1914496
2900026A02Rik	ENSMUSG00000051339	14.0031	8.43676	11.2199	0.496112	0.553	0.27435	1.65977	Up	MGI:1920194
2900092C05Rik	ENSMUSG00000030385	0	0.146643	0.0733215	2	0.024	0.048	0	Down	MGI:1920340
3110002H16Rik	ENSMUSG00000024410	20.9702	19.9642	20.4672	0.0491518	0.711	0.0349469	1.05039	Up	MGI:1916528
3110009E18Rik	ENSMUSG00000026388	12.8731	13.8821	13.3776	0.0754246	0.597	0.0450285	-1.07838	Down	MGI:1920353
3110040N11Rik	ENSMUSG00000025102	10.1471	10.0004	10.0738	0.0145626	0.528	0.00768905	1.01467	Up	MGI:1914540
3110043O21Rik	ENSMUSG00000028300	19.4723	24.2714	21.8719	0.219419	0.731	0.160395	-1.24646	Down	MGI:1920455	cell differentiation
3110070M22Rik	ENSMUSG00000074635	0.213181	0.223775	0.218478	0.04849	0.114	0.00552786	-1.04969	Down	MGI:1914554
3110079O15Rik	ENSMUSG00000026258	0.964892	0	0.482446	2	0.179	0.358	0	Up	MGI:1920484
3110082I17Rik	ENSMUSG00000053553	32.0231	37.1402	34.5816	0.147972	0.86	0.127256	-1.15979	Down	MGI:1920462
3300002I08Rik	ENSMUSG00000063364	0.941658	1.07926	1.01046	0.136178	0.241	0.0328188	-1.14613	Down	MGI:1916527
3632451O06Rik	ENSMUSG00000036242	1.20619	0.967945	1.08707	0.219163	0.247	0.0541333	1.24613	Up	MGI:1914669
3830403N18Rik	ENSMUSG00000031125	1.48898	2.6	2.04449	0.543422	0.304	0.1652	-1.74616	Down	MGI:1917941	cell differentiation
3830406C13Rik	ENSMUSG00000033111	5.78142	7.01352	6.39747	0.192592	0.438	0.0843552	-1.21311	Down	MGI:1917937
3830417A13Rik	ENSMUSG00000031179	0.89632	1.00535	0.950835	0.114668	0.235	0.0269469	-1.12164	Down	MGI:1917946
4833420G17Rik	ENSMUSG00000062822	14.4731	17.649	16.0611	0.197739	0.644	0.127344	-1.21943	Down	MGI:1914642
4833427G06Rik	ENSMUSG00000032057	0.0830936	0.128807	0.10595	0.431461	0.053	0.0228674	-1.55014	Down	MGI:1921013
4921507P07Rik	ENSMUSG00000029828	2.70453	3.73697	3.22075	0.320559	0.35	0.112196	-1.38174	Down	MGI:1918071
4921517D22Rik	ENSMUSG00000049902	0.277689	0	0.138845	2	0.075	0.15	0	Up	MGI:1918150
4921524J17Rik	ENSMUSG00000036934	4.78371	5.32878	5.05625	0.1078	0.404	0.0435513	-1.11394	Down	MGI:1913964
4921524L21Rik	ENSMUSG00000039540	0	0.150884	0.075442	2	0.026	0.052	0	Down	MGI:1918151
4921536K21Rik	ENSMUSG00000020434	0.96622	0.741574	0.853897	0.263083	0.226	0.0594568	1.30293	Up	MGI:1914680
4921539E11Rik	ENSMUSG00000028520	0.0555895	0.0513961	0.0534928	0.0783919	0.003	0.000235176	1.08159	Up	MGI:1918191
4922502D21Rik	ENSMUSG00000047720	0.0711289	0.505143	0.288136	1.50628	0.137	0.206361	-7.1018	Down	MGI:2685920
4930402H24Rik	ENSMUSG00000027309	17.6747	18.2126	17.9436	0.0299772	0.672	0.0201447	-1.03043	Down	MGI:1923029
4930404N11Rik	ENSMUSG00000020234	0.404043	0.17827	0.291156	0.775435	0.138	0.10701	2.26647	Up	MGI:1921072
4930412O13Rik	ENSMUSG00000025783	0	0.113247	0.0566235	2	0.006	0.012	0	Down	MGI:1921185
4930415F15Rik	ENSMUSG00000020191	0.541134	0.104457	0.322796	1.3528	0.148	0.200214	5.18045	Up	MGI:1921112
4930415O20Rik	ENSMUSG00000022993	0.190987	0.219157	0.205072	0.137366	0.108	0.0148356	-1.1475	Down	MGI:1921113
4930426L09Rik	ENSMUSG00000026736	0.155294	0.153824	0.154559	0.00951093	0.084	0.000798918	1.00956	Up	MGI:1921879
4930427A07Rik	ENSMUSG00000037466	18.7594	18.2599	18.5097	0.0269859	0.68	0.0183504	1.02736	Up	MGI:2144738
4930430F08Rik	ENSMUSG00000046567	10.0999	9.66943	9.88467	0.0435493	0.523	0.0227763	1.04452	Up	MGI:1921197	cell differentiation
4930432K21Rik	ENSMUSG00000008129	13.1774	11.2511	12.2142	0.157709	0.574	0.0905251	1.17121	Up	MGI:1921916
4930433I11Rik	ENSMUSG00000091692	0.0698584	0.0743722	0.0721153	0.0625914	0.023	0.0014396	-1.06461	Down	MGI:2685327
4930444G20Rik	ENSMUSG00000069712	0.0691895	0.0814612	0.0753253	0.162916	0.026	0.00423581	-1.17736	Down	MGI:2149738
4930444P10Rik	ENSMUSG00000067795	0.356122	0.139343	0.247732	0.875053	0.125	0.109382	2.55572	Up	MGI:1923049
4930447C04Rik	ENSMUSG00000021098	9.84195	18.1236	13.9828	0.592275	0.608	0.360103	-1.84146	Down	MGI:1923051	cell differentiation	abnormal male fertility
4930451I11Rik	ENSMUSG00000045989	0	0.201292	0.100646	2	0.049	0.098	0	Down	MGI:1925368
4930452B06Rik	ENSMUSG00000021747	8.12325	5.53207	6.82766	0.379513	0.451	0.17116	1.46839	Up	MGI:1926154
4930453N24Rik	ENSMUSG00000059920	10.697	11.6252	11.1611	0.0831638	0.551	0.0458233	-1.08677	Down	MGI:1914859
4930467E23Rik	ENSMUSG00000096265	0.328174	0.273434	0.300804	0.181979	0.141	0.025659	1.20019	Up	MGI:1923056
4930469G21Rik	ENSMUSG00000049160	0.0789301	0.215527	0.147229	0.927788	0.08	0.074223	-2.73061	Down	MGI:1922183
4930470P17Rik	ENSMUSG00000043583	1.28326	0.50382	0.893539	0.872305	0.231	0.201502	2.54706	Up	MGI:1914887
4930486L24Rik	ENSMUSG00000050345	7.98605	7.72455	7.8553	0.0332896	0.475	0.0158126	1.03385	Up	MGI:1922258
4930502E18Rik	ENSMUSG00000055555	7.2504	11.0494	9.1499	0.415196	0.505	0.209674	-1.52397	Down	MGI:1922263
4930503B20Rik	ENSMUSG00000090202	1.09873	1.04902	1.07388	0.0462903	0.246	0.0113874	1.04739	Up	MGI:1922264
4930503E14Rik	ENSMUSG00000072595	0.242412	0.138082	0.190247	0.548392	0.103	0.0564844	1.75557	Up	MGI:1922204
4930504O13Rik	ENSMUSG00000052642	1.806	1.04371	1.42485	0.534995	0.269	0.143914	1.73037	Up	MGI:2685370
4930519F16Rik	ENSMUSG00000031325	0.435645	0.672608	0.554126	0.427633	0.19	0.0812503	-1.54394	Down	MGI:1922356
4930519G04Rik	ENSMUSG00000029564	0.146746	0.487071	0.316908	1.07389	0.146	0.156788	-3.31914	Down	MGI:1914843
4930522H14Rik	ENSMUSG00000060491	0.142041	0	0.0710205	2	0.021	0.042	0	Up	MGI:1914896
4930523C07Rik	ENSMUSG00000090394	3.36501	3.2161	3.29055	0.0452538	0.353	0.0159746	1.0463	Up	MGI:1914897
4930524B15Rik	ENSMUSG00000020299	1.05672	2.83414	1.94543	0.913639	0.299	0.273178	-2.68202	Down	MGI:1914842
4930539E08Rik	ENSMUSG00000048905	2.56095	1.91805	2.2395	0.287073	0.312	0.0895668	1.33518	Up	MGI:1925441
4930544D05Rik	ENSMUSG00000087279	0.360402	0.182879	0.271641	0.653522	0.132	0.0862649	1.97071	Up	MGI:2148639
4930544G11Rik	ENSMUSG00000036463	0.0845761	0.120337	0.102457	0.349035	0.049	0.0171027	-1.42283	Down	MGI:1914903
4930548H24Rik	ENSMUSG00000029138	0.14657	0	0.073285	2	0.024	0.048	0	Up	MGI:1914906
4930550C14Rik	ENSMUSG00000005131	0.607397	0.648417	0.627907	0.0653281	0.2	0.0130656	-1.06753	Down	MGI:1922561
4930550L24Rik	ENSMUSG00000046180	36.2083	48.8819	42.5451	0.297886	0.909	0.270779	-1.35002	Down	MGI:1922602
4930557A04Rik	ENSMUSG00000048994	0	0.356427	0.178213	2	0.097	0.194	0	Down	MGI:1922521
4930558C23Rik	ENSMUSG00000105734	0.295242	0.168584	0.231913	0.546144	0.119	0.0649912	1.7513	Up	MGI:1914904
4930558K02Rik	ENSMUSG00000086277	9.0785	11.0004	10.0395	0.191435	0.527	0.100886	-1.2117	Down	MGI:1922618
4930562C15Rik	ENSMUSG00000022518	0.0747648	0.134526	0.104645	0.571083	0.051	0.0291252	-1.79932	Down	MGI:1926059
4930563D23Rik	ENSMUSG00000051728	0.0417902	0.418403	0.230097	1.63676	0.118	0.193138	-10.012	Down	MGI:1922578
4930563E22Rik	ENSMUSG00000053574	2.45597	2.23002	2.343	0.0964364	0.317	0.0305703	1.10132	Up	MGI:1922554
4930567H17Rik	ENSMUSG00000073141	0	0.143408	0.071704	2	0.022	0.044	0	Down	MGI:3588249
4930571K23Rik	ENSMUSG00000090457	0	0.317267	0.158634	2	0.087	0.174	0	Down	MGI:1923111
4930578C19Rik	ENSMUSG00000037358	0.133567	0.190923	0.162245	0.353515	0.089	0.0314628	-1.42942	Down	MGI:1923155
4930579G24Rik	ENSMUSG00000027811	9.79315	9.9838	9.88847	0.01928	0.523	0.0100835	-1.01947	Down	MGI:1923189
4930595M18Rik	ENSMUSG00000060673	0.575234	2.48753	1.53138	1.24874	0.276	0.344652	-4.32438	Down	MGI:3045300
4931406B18Rik	ENSMUSG00000013353	1.20568	0.475673	0.840677	0.868357	0.225	0.19538	2.53468	Up	MGI:1921304
4931406P16Rik	ENSMUSG00000066571	38.4473	40.8677	39.6575	0.0610326	0.894	0.0545631	-1.06295	Down	MGI:1924311
4931409K22Rik	ENSMUSG00000038199	0.770763	0.632275	0.701519	0.197412	0.209	0.041259	1.21903	Up	MGI:3045319
4931414P19Rik	ENSMUSG00000022179	8.2952	6.3248	7.31	0.269549	0.463	0.124801	1.31154	Up	MGI:1921609
4931417E11Rik	ENSMUSG00000056197	0	0.28803	0.144015	2	0.078	0.156	0	Down	MGI:1913990
4931428F04Rik	ENSMUSG00000014837	1.63368	2.50227	2.06798	0.42002	0.305	0.128106	-1.53168	Down	MGI:1921606
4931428L18Rik	ENSMUSG00000086727	1.30588	0.401543	0.853711	1.0593	0.226	0.239402	3.25215	Up	MGI:1918238
4931429L15Rik	ENSMUSG00000056617	0.0578936	0.0839503	0.070922	0.3674	0.021	0.00771539	-1.45008	Down	MGI:1921611
4932438A13Rik	ENSMUSG00000037270	18.9955	21.8997	20.4476	0.142031	0.71	0.100842	-1.15289	Down	MGI:2444631	cell differentiation
4932443I19Rik	ENSMUSG00000090336	0.1056	0.114335	0.109967	0.0794326	0.055	0.00436879	-1.08272	Down	MGI:2685952
4933402E13Rik	ENSMUSG00000045330	26.481	58.6426	42.5618	0.755645	0.909	0.686881	-2.21452	Down	MGI:1921687
4933402P03Rik	ENSMUSG00000044084	0	0.443375	0.221688	2	0.115	0.23	0	Down	MGI:1918293
4933403O08Rik	ENSMUSG00000079460	2.13898	2.47037	2.30468	0.14379	0.315	0.045294	-1.15493	Down	MGI:1918280
4933406M09Rik	ENSMUSG00000050526	0.79184	0.462432	0.627136	0.525258	0.2	0.105052	1.71234	Up	MGI:3045320
4933407L21Rik	ENSMUSG00000026224	0.344404	0.359303	0.351853	0.0423443	0.154	0.00652103	-1.04326	Down	MGI:1918391
4933411K16Rik	ENSMUSG00000090369	0.364221	0.938944	0.651582	0.882042	0.203	0.179054	-2.57795	Down	MGI:1914015
4933412E24Rik	ENSMUSG00000071749	0.659254	0.267467	0.463361	0.845534	0.176	0.148814	2.46481	Up	MGI:1918338
4933415F23Rik	ENSMUSG00000073730	0.146422	0.447395	0.296909	1.01369	0.14	0.141917	-3.05552	Down	MGI:1914005
4933416I08Rik	ENSMUSG00000071763	0.0840887	0.395418	0.239753	1.29854	0.122	0.158422	-4.70239	Down	MGI:1918409
4933425L06Rik	ENSMUSG00000021718	2.39254	2.35563	2.37409	0.015547	0.319	0.00495951	1.01567	Up	MGI:1914013
4933427D06Rik	ENSMUSG00000055403	21.9422	27.9204	24.9313	0.239787	0.769	0.184396	-1.27245	Down	MGI:3026922
4933427D14Rik	ENSMUSG00000020807	6.52689	5.46934	5.99812	0.176314	0.428	0.0754623	1.19336	Up	MGI:1921727
4933430I17Rik	ENSMUSG00000058046	4.85682	5.18144	5.01913	0.0646765	0.403	0.0260646	-1.06684	Down	MGI:3045314
5031414D18Rik	ENSMUSG00000034959	0.329359	3.44062	1.88499	1.65055	0.296	0.488561	-10.4464	Down	MGI:2685590
5031439G07Rik	ENSMUSG00000036046	13.9551	13.2325	13.5938	0.0531566	0.601	0.0319471	1.05461	Up	MGI:2444899
5330417C22Rik	ENSMUSG00000040412	1.46584	1.56199	1.51391	0.0635108	0.274	0.017402	-1.06559	Down	MGI:1923930		abnormal male fertility;abnormal spermatogenesis
5430416O09Rik	ENSMUSG00000028475	1.02602	1.23347	1.12974	0.183626	0.25	0.0459064	-1.20219	Down	MGI:1918656
5730409E04Rik	ENSMUSG00000073755	6.29613	5.89397	6.09505	0.0659814	0.431	0.028438	1.06823	Up	MGI:3609248
5730455P16Rik	ENSMUSG00000057181	4.63519	6.5933	5.61425	0.348775	0.419	0.146137	-1.42244	Down	MGI:1917841
5730507C01Rik	ENSMUSG00000073197	0.0943221	0.138268	0.116295	0.377883	0.06	0.022673	-1.46591	Down	MGI:1917882
5730508B09Rik	ENSMUSG00000050549	6.70119	9.92863	8.31491	0.388151	0.485	0.188253	-1.48162	Down	MGI:1917867
5730522E02Rik	ENSMUSG00000032985	0.108913	0.0774755	0.0931943	0.337333	0.042	0.014168	1.40577	Up	MGI:1917876
5730559C18Rik	ENSMUSG00000041605	0.951723	0.600275	0.775999	0.452897	0.218	0.0987317	1.58548	Up	MGI:1921579
5830411N06Rik	ENSMUSG00000054672	0.0389906	0.0718988	0.0554447	0.593532	0.005	0.00296766	-1.844	Down	MGI:2443685	cell differentiation
6030408B16Rik	ENSMUSG00000075408	3.12583	3.21914	3.17248	0.0294123	0.348	0.0102355	-1.02985	Down	MGI:1924967
6030419C18Rik	ENSMUSG00000066607	4.14986	2.16625	3.15806	0.628111	0.347	0.217955	1.91569	Up	MGI:2442108
6030458C11Rik	ENSMUSG00000022195	11.5729	13.5651	12.569	0.158501	0.58	0.0919306	-1.17214	Down	MGI:1925127
6030468B19Rik	ENSMUSG00000025573	0.110053	0.160707	0.13538	0.374162	0.073	0.0273138	-1.46027	Down	MGI:1924977
6030498E09Rik	ENSMUSG00000051361	0.756052	0.689194	0.722623	0.0925213	0.212	0.0196145	1.09701	Up	MGI:1925133
6330403K07Rik	ENSMUSG00000018451	3.36261	1.85449	2.60855	0.578145	0.328	0.189632	1.81323	Up	MGI:1918001
6330408A02Rik	ENSMUSG00000070814	6.56622	6.56544	6.56583	0.000118797	0.443	5.2627e-05	1.00012	Up	MGI:2447816	cell differentiation
6430548M08Rik	ENSMUSG00000031824	7.46047	9.19672	8.32859	0.208469	0.485	0.101107	-1.23273	Down	MGI:2443793
6430550D23Rik	ENSMUSG00000074646	0.439337	0.967438	0.703388	0.750797	0.21	0.157667	-2.20204	Down	MGI:2443361
6430571L13Rik	ENSMUSG00000037977	0.474989	0.526755	0.500872	0.103352	0.181	0.0187067	-1.10898	Down	MGI:2445137
6430573F11Rik	ENSMUSG00000039620	0.620682	0.593998	0.60734	0.0439359	0.197	0.00865536	1.04492	Up	MGI:2442328
6720489N17Rik	ENSMUSG00000072066	1.07469	0.905919	0.990304	0.170423	0.239	0.0407312	1.1863	Up	MGI:2443901
6820408C15Rik	ENSMUSG00000032680	7.24172	7.22605	7.23389	0.00216661	0.461	0.000998807	1.00217	Up	MGI:3045333
8030411F24Rik	ENSMUSG00000027444	29.067	27.94	28.5035	0.039539	0.806	0.0318684	1.04034	Up	MGI:1925859
8030462N17Rik	ENSMUSG00000047466	15.7499	20.7923	18.2711	0.275977	0.677	0.186836	-1.32015	Down	MGI:2444951
9030617O03Rik	ENSMUSG00000021185	0.332019	0.153149	0.242584	0.737353	0.123	0.0906944	2.16795	Up	MGI:2444813
9130008F23Rik	ENSMUSG00000054951	0.217371	0.267298	0.242335	0.206025	0.123	0.0253411	-1.22969	Down	MGI:1918833
9130011E15Rik	ENSMUSG00000039901	22.1368	22.5495	22.3432	0.018471	0.736	0.0135946	-1.01864	Down	MGI:1918867
9130023H24Rik	ENSMUSG00000062944	0	0.151082	0.075541	2	0.026	0.052	0	Down	MGI:2442738
9230104L09Rik	ENSMUSG00000027446	0.191527	0.666785	0.429156	1.10742	0.17	0.188262	-3.48142	Down	MGI:1924955
9230110C19Rik	ENSMUSG00000053070	10.6803	9.39992	10.0401	0.127526	0.527	0.0672065	1.13621	Up	MGI:3045346
9330182L06Rik	ENSMUSG00000056004	3.76811	3.41222	3.59016	0.0991291	0.361	0.0357856	1.1043	Up	MGI:2443264
9430015G10Rik	ENSMUSG00000059939	22.1375	21.9011	22.0193	0.010736	0.733	0.00786951	1.01079	Up	MGI:2444364
9430016H08Rik	ENSMUSG00000025971	11.1433	13.6898	12.4166	0.205089	0.577	0.118336	-1.22852	Down	MGI:1915365
9430020K01Rik	ENSMUSG00000033960	26.075	26.3156	26.1953	0.00918485	0.782	0.00718256	-1.00923	Down	MGI:2685174	cell proliferation
9430038I01Rik	ENSMUSG00000040139	8.88725	8.8607	8.87397	0.00299189	0.498	0.00148996	1.003	Up	MGI:1924502
9530002B09Rik	ENSMUSG00000023263	0.642239	2.00835	1.32529	1.0308	0.263	0.2711	-3.12711	Down	MGI:1924682
9530068E07Rik	ENSMUSG00000036275	48.2908	59.5771	53.9339	0.209262	0.951	0.199008	-1.23372	Down	MGI:2654705
9530077C05Rik	ENSMUSG00000036411	11.8873	11.8099	11.8486	0.00653242	0.567	0.00370388	1.00655	Up	MGI:1915533
9930012K11Rik	ENSMUSG00000044551	1.15282	1.36212	1.25747	0.166445	0.259	0.0431093	-1.18155	Down	MGI:2145726
9930021J03Rik	ENSMUSG00000046138	18.1345	20.0633	19.0989	0.10099	0.69	0.0696832	-1.10636	Down	MGI:2444398
9930104L06Rik	ENSMUSG00000044730	8.23617	7.79666	8.01642	0.0548263	0.479	0.0262618	1.05637	Up	MGI:3041172
9930111J21Rik2	ENSMUSG00000069892	0.202355	0.0959109	0.149133	0.713753	0.082	0.0585278	2.10982	Up	MGI:3711310
a	ENSMUSG00000027596	0.0619709	0.175213	0.118592	0.954889	0.062	0.0592031	-2.82734	Down	MGI:87853
A130010J15Rik	ENSMUSG00000079144	3.35156	4.08227	3.71692	0.19659	0.366	0.0719521	-1.21802	Down	MGI:2441776
A230046K03Rik	ENSMUSG00000034560	9.29834	12.8152	11.0568	0.318073	0.549	0.174622	-1.37822	Down	MGI:2441787
A230065H16Rik	ENSMUSG00000087075	14.6812	9.22892	11.9551	0.456065	0.569	0.259501	1.59078	Up	MGI:2685744
A2m	ENSMUSG00000030111	0.598846	0.344501	0.471673	0.53924	0.177	0.0954454	1.7383	Up	MGI:2449119	cell differentiation
A3galt2	ENSMUSG00000028794	0.220921	0.241762	0.231342	0.0900876	0.118	0.0106303	-1.09434	Down	MGI:2685279
A430005L14Rik	ENSMUSG00000047613	26.0741	20.3414	23.2078	0.247017	0.747	0.184521	1.28182	Up	MGI:2140680
A430105I19Rik	ENSMUSG00000045838	0.0690886	0.152923	0.111006	0.755225	0.056	0.0422926	-2.21343	Down	MGI:2685199
A4galt	ENSMUSG00000047878	0.418951	0.401416	0.410184	0.0427492	0.166	0.00709636	1.04368	Up	MGI:3512453
A530016L24Rik	ENSMUSG00000043122	0.277131	0.198647	0.237889	0.329919	0.121	0.0399201	1.39509	Up	MGI:2443020
A530032D15Rik	ENSMUSG00000089844	0.129833	0.0802872	0.10506	0.471595	0.052	0.0245229	1.61711	Up	MGI:3037746
A530064D06Rik	ENSMUSG00000043939	1.13089	0.883022	1.00696	0.246156	0.241	0.0593235	1.2807	Up	MGI:2443476
A630001G21Rik	ENSMUSG00000052760	0.196832	0.0584998	0.127666	1.08355	0.068	0.0736813	3.36466	Up	MGI:2443131
A630073D07Rik	ENSMUSG00000067541	0	0.461625	0.230813	2	0.118	0.236	0	Down	MGI:2686534
A730017C20Rik	ENSMUSG00000050875	2.9692	6.78845	4.87882	0.782822	0.4	0.313129	-2.28629	Down	MGI:2442934
A730046J19Rik	ENSMUSG00000085139	0.526545	0.586433	0.556489	0.107618	0.19	0.0204473	-1.11374	Down	MGI:2442684
A830010M20Rik	ENSMUSG00000044060	4.55672	5.23443	4.89558	0.138433	0.4	0.0553733	-1.14873	Down
A830080D01Rik	ENSMUSG00000044150	24.4808	31.757	28.1189	0.258765	0.803	0.207789	-1.29722	Down	MGI:2685992
A930003A15Rik	ENSMUSG00000075330	0.119601	0	0.0598005	2	0.009	0.018	0	Up	MGI:1915412
A930004D18Rik	ENSMUSG00000054057	0.232925	0.177412	0.205168	0.270573	0.108	0.0292219	1.3129	Up	MGI:1925190
A930011G23Rik	ENSMUSG00000089809	14.0288	12.6739	13.3514	0.10148	0.596	0.0604823	1.1069	Up	MGI:2443755
AA415398	ENSMUSG00000087385	2.69674	1.78822	2.24248	0.405141	0.313	0.126809	1.50806	Up	MGI:3035485
AA467197	ENSMUSG00000033213	0.922935	1.22565	1.07429	0.281781	0.246	0.0693181	-1.32799	Down	MGI:3034182
Aaas	ENSMUSG00000036678	47.4684	40.7188	44.0936	0.153074	0.916	0.140216	1.16576	Up	MGI:2443767
Aacs	ENSMUSG00000029482	20.9842	18.9328	19.9585	0.102783	0.704	0.0723594	1.10835	Up	MGI:1926144
Aadat	ENSMUSG00000057228	0.0595618	0.196409	0.127985	1.06924	0.068	0.0727084	-3.29757	Down	MGI:1345167
Aagab	ENSMUSG00000037257	15.6404	21.3846	18.5125	0.310288	0.68	0.210996	-1.36727	Down	MGI:1914189
Aamp	ENSMUSG00000006299	70.545	68.7625	69.6538	0.0255909	0.978	0.0250279	1.02592	Up	MGI:107809
Aanat	ENSMUSG00000020804	0.243897	0.279564	0.26173	0.136274	0.129	0.0175793	-1.14624	Down	MGI:1328365
Aard	ENSMUSG00000068522	104.627	149.311	126.969	0.351928	0.998	0.351225	-1.42708	Down	MGI:2181621
Aars	ENSMUSG00000031960	38.4713	34.2478	36.3595	0.116159	0.873	0.101407	1.12332	Up	MGI:2384560
Aars2	ENSMUSG00000023938	5.68135	4.94752	5.31443	0.138083	0.411	0.0567522	1.14832	Up	MGI:2681839
Aasdh	ENSMUSG00000055923	8.54303	7.23834	7.89068	0.165346	0.476	0.0787045	1.18025	Up	MGI:2442517
Aasdhppt	ENSMUSG00000025894	10.0675	16.9174	13.4925	0.507684	0.598	0.303595	-1.6804	Down	MGI:1914868
Aass	ENSMUSG00000029695	6.52928	7.67649	7.10289	0.161513	0.458	0.0739731	-1.1757	Down	MGI:1353573
Aatf	ENSMUSG00000018697	69.0406	66.9064	67.9735	0.0313975	0.976	0.030644	1.0319	Up	MGI:1929608
Aatk	ENSMUSG00000025375	0.327279	0.287149	0.307214	0.130626	0.143	0.0186795	1.13975	Up	MGI:1197518	cell differentiation
AB124611	ENSMUSG00000057191	1.0252	0.469223	0.747211	0.744069	0.215	0.159975	2.18489	Up	MGI:3043001
Abat	ENSMUSG00000057880	29.6626	31.5064	30.5845	0.0602854	0.826	0.0497958	-1.06216	Down	MGI:2443582
Abca1	ENSMUSG00000015243	23.6805	25.7622	24.7214	0.0842066	0.767	0.0645864	-1.08791	Down	MGI:99607		abnormal male fertility;abnormal spermatogenesis
Abca12	ENSMUSG00000050296	0.377431	0.305493	0.341462	0.210675	0.152	0.0320226	1.23548	Up	MGI:2676312	cell differentiation
Abca13	ENSMUSG00000004668	0.155105	0.160283	0.157694	0.0328357	0.086	0.00282387	-1.03338	Down	MGI:2388707
Abca16	ENSMUSG00000051900	0.421261	0.386	0.403631	0.0873596	0.165	0.0144143	1.09135	Up	MGI:2388711
Abca17	ENSMUSG00000035435	0.0646015	0.0733734	0.0689875	0.127152	0.019	0.00241589	-1.13578	Down	MGI:3625331
Abca2	ENSMUSG00000026944	33.7044	35.6266	34.6655	0.0554499	0.861	0.0477424	-1.05703	Down	MGI:99606
Abca3	ENSMUSG00000024130	15.4284	14.6817	15.055	0.049598	0.629	0.0311971	1.05086	Up	MGI:1351617
Abca4	ENSMUSG00000028125	1.4871	2.26786	1.87748	0.415855	0.295	0.122677	-1.52502	Down	MGI:109424
Abca5	ENSMUSG00000018800	3.55481	7.47501	5.51491	0.710837	0.417	0.296419	-2.10279	Down	MGI:2386607	cell differentiation
Abca6	ENSMUSG00000044749	0.223711	0.226327	0.225019	0.0116257	0.116	0.00134858	-1.01169	Down	MGI:1923434
Abca7	ENSMUSG00000035722	7.27406	5.74855	6.51131	0.234286	0.441	0.10332	1.26537	Up	MGI:1351646
Abcb10	ENSMUSG00000031974	7.75168	7.68365	7.71766	0.00881607	0.473	0.00417	1.00886	Up	MGI:1860508
Abcb4	ENSMUSG00000042476	0.0972034	0.0649718	0.0810876	0.397491	0.031	0.0123222	1.49609	Up	MGI:97569
Abcb5	ENSMUSG00000072791	0.104489	0	0.0522445	2	0.002	0.004	0	Up	MGI:1924956	cell differentiation
Abcb6	ENSMUSG00000026198	33.6137	25.497	29.5554	0.274627	0.816	0.224096	1.31834	Up	MGI:1921354
Abcb7	ENSMUSG00000031333	6.35769	8.67807	7.51788	0.308648	0.468	0.144447	-1.36497	Down	MGI:109533
Abcb8	ENSMUSG00000028973	26.42	23.4676	24.9438	0.118362	0.769	0.0910204	1.12581	Up	MGI:1351667
Abcb9	ENSMUSG00000029408	9.3587	10.9826	10.1707	0.159665	0.531	0.0847823	-1.17352	Down	MGI:1861729
Abcc1	ENSMUSG00000023088	37.6542	47.7767	42.7155	0.236975	0.91	0.215647	-1.26883	Down	MGI:102676
Abcc10	ENSMUSG00000032842	8.77061	8.9366	8.8536	0.0187483	0.498	0.00933665	-1.01893	Down	MGI:2386976
Abcc12	ENSMUSG00000036872	0.0539675	0.0722402	0.0631039	0.289566	0.012	0.00347479	-1.33859	Down	MGI:2441679
Abcc2	ENSMUSG00000025194	0.0442364	0.143479	0.0938577	1.05737	0.043	0.045467	-3.24346	Down	MGI:1352447
Abcc3	ENSMUSG00000020865	0.937226	0.582704	0.759965	0.466498	0.216	0.100764	1.60841	Up	MGI:1923658
Abcc4	ENSMUSG00000032849	15.989	13.0124	14.5007	0.205273	0.617	0.126653	1.22875	Up	MGI:2443111	cell proliferation
Abcc5	ENSMUSG00000022822	23.8858	22.176	23.0309	0.0742394	0.744	0.0552341	1.0771	Up	MGI:1351644
Abcc6	ENSMUSG00000030834	0.143637	0.144919	0.144278	0.00888562	0.078	0.000693079	-1.00893	Down	MGI:1351634
Abcc8	ENSMUSG00000040136	13.8098	9.95081	11.8803	0.324822	0.567	0.184174	1.38781	Up	MGI:1352629	cell proliferation;cell differentiation
Abcc9	ENSMUSG00000030249	0.053993	0.108366	0.0811795	0.669787	0.031	0.0207634	-2.00704	Down	MGI:1352630
Abcd1	ENSMUSG00000031378	5.19409	5.15911	5.1766	0.00675733	0.408	0.00275699	1.00678	Up	MGI:1349215
Abcd2	ENSMUSG00000055782	3.42151	4.19398	3.80774	0.202868	0.369	0.0748583	-1.22577	Down	MGI:1349467
Abcd3	ENSMUSG00000028127	27.7663	42.0891	34.9277	0.41007	0.863	0.35389	-1.51583	Down	MGI:1349216
Abcd4	ENSMUSG00000021240	4.68724	3.13753	3.91239	0.396104	0.372	0.147351	1.49393	Up	MGI:1349217
Abce1	ENSMUSG00000058355	27.4734	35.2077	31.3406	0.246783	0.833	0.20557	-1.28152	Down	MGI:1195458
Abcf1	ENSMUSG00000038762	51.3991	47.7531	49.5761	0.0735435	0.938	0.0689838	1.07635	Up	MGI:1351658
Abcf2	ENSMUSG00000028953	50.1481	48.6885	49.4183	0.0295356	0.938	0.0277044	1.02998	Up	MGI:1351657
Abcf3	ENSMUSG00000003234	20.026	19.457	19.7415	0.0288225	0.701	0.0202046	1.02924	Up	MGI:1351656
Abcg1	ENSMUSG00000024030	10.4742	8.97976	9.72698	0.153639	0.519	0.0797385	1.16642	Up	MGI:107704	cell differentiation
Abcg2	ENSMUSG00000029802	9.04103	11.189	10.115	0.212355	0.53	0.112548	-1.23758	Down	MGI:1347061
Abcg3	ENSMUSG00000029299	0.0761839	0.115848	0.096016	0.413099	0.044	0.0181764	-1.52064	Down	MGI:1351624
Abcg4	ENSMUSG00000032131	1.14212	0.614945	0.878532	0.600063	0.23	0.138015	1.85727	Up	MGI:1890594
Abcg8	ENSMUSG00000024254	0.0652262	0.0619795	0.0636029	0.0510465	0.013	0.000663604	1.05238	Up	MGI:1914720
Abhd10	ENSMUSG00000033157	26.4561	27.7997	27.1279	0.0495283	0.793	0.039276	-1.05079	Down	MGI:2442422
Abhd11	ENSMUSG00000040532	33.0992	28.4327	30.766	0.151677	0.828	0.125589	1.16412	Up	MGI:1916008
Abhd12	ENSMUSG00000032046	39.1716	51.412	45.2918	0.270256	0.921	0.248906	-1.31248	Down	MGI:1923442
Abhd12b	ENSMUSG00000090121	0.102586	0.102857	0.102721	0.0026382	0.05	0.00013191	-1.00264	Down	MGI:2685650
Abhd14a	ENSMUSG00000042210	11.3278	5.47142	8.39961	0.69722	0.487	0.339546	2.07036	Up	MGI:1915894
Abhd14b	ENSMUSG00000042073	2.59966	1.88436	2.24201	0.319047	0.313	0.0998616	1.3796	Up	MGI:1923741
Abhd15	ENSMUSG00000000686	0.350869	0.184792	0.26783	0.620082	0.131	0.0812308	1.89872	Up	MGI:1914727
Abhd16a	ENSMUSG00000007036	52.302	45.7993	49.0507	0.132571	0.937	0.124219	1.14198	Up	MGI:99476
Abhd16b	ENSMUSG00000055882	0.0997742	0.134106	0.11694	0.293584	0.06	0.0176151	-1.34409	Down	MGI:3607711
Abhd2	ENSMUSG00000039202	16.6494	15.1327	15.891	0.0954437	0.642	0.0612748	1.10023	Up	MGI:1914344	cell differentiation
Abhd3	ENSMUSG00000002475	22.1931	19.0385	20.6158	0.153019	0.713	0.109102	1.1657	Up	MGI:2147183
Abhd4	ENSMUSG00000040997	65.4432	72.0205	68.7319	0.0956951	0.977	0.0934941	-1.1005	Down	MGI:1915938
Abhd5	ENSMUSG00000032540	25.9853	22.6031	24.2942	0.139218	0.762	0.106084	1.14963	Up	MGI:1914719	cell differentiation
Abhd6	ENSMUSG00000025277	1.48439	2.00924	1.74682	0.300461	0.287	0.0862323	-1.35358	Down	MGI:1913332
Abhd8	ENSMUSG00000007950	20.6514	18.1981	19.4247	0.126298	0.695	0.0877769	1.13481	Up	MGI:1918946
Abi1	ENSMUSG00000058835	39.349	44.3664	41.8577	0.119868	0.906	0.1086	-1.12751	Down	MGI:104913	cell differentiation
Abi2	ENSMUSG00000026782	12.216	17.0964	14.6562	0.332992	0.62	0.206455	-1.39951	Down	MGI:106913
Abl1	ENSMUSG00000026842	39.079	32.3724	35.7257	0.187725	0.87	0.163321	1.20717	Up	MGI:87859	cell proliferation;cell differentiation
Abl2	ENSMUSG00000026596	14.6726	13.5294	14.101	0.0810723	0.61	0.0494541	1.0845	Up	MGI:87860	cell proliferation;cell differentiation
Ablim1	ENSMUSG00000025085	2.12653	1.49959	1.81306	0.345794	0.291	0.100626	1.41808	Up	MGI:1194500	cell differentiation
Ablim2	ENSMUSG00000029095	1.77226	1.71341	1.74283	0.0337668	0.287	0.00969108	1.03435	Up	MGI:2385758
Ablim3	ENSMUSG00000032735	1.06089	0.42747	0.744179	0.851162	0.214	0.182149	2.48178	Up	MGI:2442582
Abo	ENSMUSG00000015787	0.288307	0.358076	0.323191	0.215875	0.148	0.0319495	-1.242	Down	MGI:2135738
Abr	ENSMUSG00000017631	36.6142	26.9924	31.8033	0.302541	0.837	0.253227	1.35646	Up	MGI:107771
Abt1	ENSMUSG00000036376	31.5114	27.1383	29.3248	0.149126	0.813	0.12124	1.16114	Up	MGI:1353636	cell differentiation
Abtb1	ENSMUSG00000030083	1.60685	1.90761	1.75723	0.171156	0.288	0.0492929	-1.18717	Down	MGI:1933148
Abtb2	ENSMUSG00000032724	27.6084	30.898	29.2532	0.112453	0.813	0.091424	-1.11915	Down	MGI:2139365
Acaa1b	ENSMUSG00000010651	5.23822	3.96336	4.60079	0.277096	0.392	0.108622	1.32166	Up	MGI:3605455
Acaa2	ENSMUSG00000036880	66.6267	66.4798	66.5532	0.00220726	0.973	0.00214766	1.00221	Up	MGI:1098623
Acaca	ENSMUSG00000020532	20.2729	18.4474	19.3601	0.0942916	0.695	0.0655327	1.09896	Up	MGI:108451
Acacb	ENSMUSG00000042010	4.33551	4.0663	4.20091	0.0640838	0.381	0.0244159	1.06621	Up	MGI:2140940
Acad11	ENSMUSG00000090150	12.0519	10.4903	11.2711	0.138549	0.554	0.0767562	1.14886	Up	MGI:2143169
Acad8	ENSMUSG00000031969	10.2233	19.9453	15.0843	0.644511	0.629	0.405398	-1.95096	Down	MGI:1914198
Acad9	ENSMUSG00000027710	17.8619	22.1487	20.0053	0.214283	0.705	0.15107	-1.24	Down	MGI:1914272
Acadl	ENSMUSG00000026003	16.6936	17.2933	16.9934	0.0352901	0.659	0.0232562	-1.03592	Down	MGI:87866
Acadm	ENSMUSG00000062908	37.6592	38.2953	37.9772	0.0167495	0.883	0.0147898	-1.01689	Down	MGI:87867	cell differentiation
Acads	ENSMUSG00000029545	24.2499	17.9224	21.0861	0.300078	0.72	0.216057	1.35305	Up	MGI:87868
Acadsb	ENSMUSG00000030861	11.9299	15.2302	13.58	0.243026	0.6	0.145815	-1.27664	Down	MGI:1914135
Acadvl	ENSMUSG00000018574	35.0801	38.7572	36.9186	0.0996001	0.877	0.0873493	-1.10482	Down	MGI:895149
Acan	ENSMUSG00000030607	3.7534	3.02563	3.38952	0.214712	0.356	0.0764375	1.24054	Up	MGI:99602	cell differentiation
Acap1	ENSMUSG00000001588	1.18667	0.864066	1.02537	0.314623	0.243	0.0764533	1.37336	Up	MGI:2388270
Acap2	ENSMUSG00000049076	12.6319	12.2061	12.419	0.0342862	0.577	0.0197831	1.03488	Up	MGI:1925868
Acat1	ENSMUSG00000032047	35.8296	37.3138	36.5717	0.0405833	0.875	0.0355104	-1.04142	Down	MGI:87870
Acbd3	ENSMUSG00000026499	17.2505	21.573	19.4117	0.222674	0.695	0.154759	-1.25057	Down	MGI:2181074
Acbd5	ENSMUSG00000026781	17.5673	22.8799	20.2236	0.262693	0.708	0.185987	-1.30241	Down	MGI:1921409
Acbd6	ENSMUSG00000033701	44.5908	35.9158	40.2533	0.21551	0.897	0.193313	1.24154	Up	MGI:1919732
Acbd7	ENSMUSG00000026644	1.56246	2.8765	2.21948	0.592049	0.312	0.184719	-1.84101	Down	MGI:1925495
Accs	ENSMUSG00000040272	3.77453	2.57447	3.1745	0.378031	0.348	0.131555	1.46614	Up	MGI:1919717
Accsl	ENSMUSG00000075023	0.215964	0.181326	0.198645	0.174371	0.106	0.0184834	1.19103	Up	MGI:3584519
Acd	ENSMUSG00000038000	27.4055	20.0209	23.7132	0.311413	0.753	0.234494	1.36884	Up	MGI:87873
Ace	ENSMUSG00000020681	14.1899	11.2147	12.7023	0.234225	0.583	0.136553	1.26529	Up	MGI:87874	cell proliferation;cell differentiation	abnormal male fertility
Acer1	ENSMUSG00000045019	0.0915025	0.0950227	0.0932626	0.037745	0.042	0.00158529	-1.03847	Down	MGI:2181962	cell differentiation
Acer2	ENSMUSG00000038007	3.42757	2.55852	2.99304	0.290356	0.342	0.0993019	1.33967	Up	MGI:1920932	cell proliferation
Acer3	ENSMUSG00000030760	20.4048	35.1729	27.7889	0.53144	0.799	0.42462	-1.72376	Down	MGI:1913440	cell proliferation
Ache	ENSMUSG00000023328	0.115528	0.175182	0.145355	0.410402	0.079	0.0324218	-1.51636	Down	MGI:87876	cell differentiation
Acin1	ENSMUSG00000022185	66.6653	55.8172	61.2413	0.177137	0.966	0.171114	1.19435	Up	MGI:1891824
Acly	ENSMUSG00000020917	127.239	126.139	126.689	0.00868268	0.998	0.00866531	1.00872	Up	MGI:103251
Acmsd	ENSMUSG00000026348	0.159011	0.0499763	0.104494	1.04346	0.051	0.0532163	3.18173	Up	MGI:2386323
Acnat2	ENSMUSG00000060317	0	0.100931	0.0504655	2	0	0	0	Down	MGI:2444345
Aco1	ENSMUSG00000028405	22.695	18.212	20.4535	0.21918	0.711	0.155837	1.24616	Up	MGI:87879
Aco2	ENSMUSG00000022477	40.1914	59.2796	49.7355	0.383794	0.939	0.360383	-1.47493	Down	MGI:87880
Acot10	ENSMUSG00000047565	16.2755	18.4353	17.3554	0.124445	0.664	0.0826318	-1.1327	Down	MGI:1928940
Acot11	ENSMUSG00000034853	3.02649	1.92229	2.47439	0.446251	0.323	0.144139	1.57442	Up	MGI:1913736
Acot13	ENSMUSG00000006717	40.6584	24.471	32.5647	0.497084	0.843	0.419042	1.66149	Up	MGI:1914084
Acot3	ENSMUSG00000021228	0.817453	0.520296	0.668875	0.444264	0.205	0.0910742	1.57113	Up	MGI:2159619
Acot5	ENSMUSG00000042540	0.350204	0.350625	0.350415	0.00120143	0.153	0.000183819	-1.0012	Down	MGI:2384969
Acot9	ENSMUSG00000025287	9.03906	11.1063	10.0727	0.205232	0.528	0.108363	-1.2287	Down	MGI:1928939
Acox1	ENSMUSG00000020777	16.2392	18.1101	17.1746	0.108934	0.661	0.0720052	-1.11521	Down	MGI:1330812		abnormal male fertility;abnormal spermatogenesis
Acox2	ENSMUSG00000021751	0.161143	0.106613	0.133878	0.407311	0.072	0.0293264	1.51148	Up	MGI:1934852
Acox3	ENSMUSG00000029098	4.02051	3.62424	3.82238	0.103671	0.369	0.0382547	1.10934	Up	MGI:1933156
Acoxl	ENSMUSG00000027380	0.339473	0.589997	0.464735	0.539069	0.176	0.0948761	-1.73798	Down	MGI:1921371
Acp1	ENSMUSG00000044573	2.44078	2.51401	2.4774	0.0295593	0.323	0.00954765	-1.03	Down	MGI:87881
Acp2	ENSMUSG00000002103	8.74092	8.93615	8.83854	0.0220885	0.497	0.010978	-1.02234	Down	MGI:87882
Acp5	ENSMUSG00000001348	11.2009	9.57143	10.3862	0.156889	0.534	0.0837785	1.17024	Up	MGI:87883
Acp6	ENSMUSG00000028093	32.4856	29.1989	30.8422	0.106565	0.829	0.0883423	1.11256	Up	MGI:1931010	cell differentiation
Acpp	ENSMUSG00000032561	1.04415	0.711707	0.877928	0.378668	0.23	0.0870935	1.46711	Up	MGI:1928480
Acr	ENSMUSG00000022622	0.173098	0.268726	0.220912	0.432878	0.114	0.0493481	-1.55245	Down	MGI:87884
Acrv1	ENSMUSG00000032110	0.0546437	0.126097	0.0903703	0.790672	0.039	0.0308362	-2.30762	Down	MGI:104590
Acsbg1	ENSMUSG00000032281	73.6293	64.5748	69.102	0.131031	0.977	0.128017	1.14022	Up	MGI:2385656
Acsbg2	ENSMUSG00000024207	0	0.102156	0.051078	2	0	0	0	Down	MGI:3587728	cell differentiation
Acsf2	ENSMUSG00000076435	19.2961	11.3326	15.3143	0.520002	0.632	0.328642	1.70271	Up	MGI:2388287
Acsf3	ENSMUSG00000015016	10.3436	9.25423	9.79892	0.111173	0.521	0.0579209	1.11772	Up	MGI:2182591
Acsl1	ENSMUSG00000018796	24.0671	24.2432	24.1551	0.00729037	0.759	0.00553339	-1.00732	Down	MGI:102797
Acsl4	ENSMUSG00000031278	16.1785	21.6276	18.9031	0.288266	0.687	0.198039	-1.33681	Down	MGI:1354713	cell differentiation
Acsl5	ENSMUSG00000024981	3.4226	2.3066	2.8646	0.389583	0.337	0.13129	1.48383	Up	MGI:1919129
Acsl6	ENSMUSG00000020333	1.88931	6.87436	4.38184	1.13766	0.386	0.439138	-3.63856	Down	MGI:894291	cell proliferation;cell differentiation
Acss1	ENSMUSG00000027452	28.3247	30.5265	29.4256	0.074826	0.815	0.0609832	-1.07773	Down	MGI:1915988
Acss3	ENSMUSG00000035948	0.459067	0.154257	0.306662	0.993961	0.142	0.141142	2.97599	Up	MGI:2685720
Acta1	ENSMUSG00000031972	0.0890628	0.0645784	0.0768206	0.318722	0.027	0.00860549	1.37914	Up	MGI:87902	cell differentiation
Acta2	ENSMUSG00000035783	12.036	6.76842	9.40221	0.560249	0.512	0.286848	1.77826	Up	MGI:87909
Actb	ENSMUSG00000029580	33.1834	36.3315	34.7574	0.0905734	0.862	0.0780743	-1.09487	Down	MGI:87904	cell differentiation
Actc1	ENSMUSG00000068614	0.153763	0.1769	0.165332	0.139943	0.091	0.0127348	-1.15047	Down	MGI:87905	cell differentiation
Actg1	ENSMUSG00000062825	68.1556	67.7723	67.964	0.00563975	0.976	0.0055044	1.00566	Up	MGI:87906	cell differentiation
Actg2	ENSMUSG00000059430	0.768811	0.570341	0.669576	0.296411	0.205	0.0607643	1.34798	Up	MGI:104589
Actl6a	ENSMUSG00000027671	43.3623	42.1443	42.7533	0.028489	0.91	0.025925	1.0289	Up	MGI:1861453
Actl6b	ENSMUSG00000029712	0.216911	0.0569447	0.136928	1.16825	0.074	0.0864507	3.80915	Up	MGI:1933548
Actl7a	ENSMUSG00000070979	0.0589879	0.269754	0.164371	1.28226	0.09	0.115403	-4.57304	Down	MGI:1343051
Actl7b	ENSMUSG00000070980	0.0855204	0.333263	0.209392	1.18315	0.11	0.130147	-3.89688	Down	MGI:1343053
Actl9	ENSMUSG00000092519	0	0.221704	0.110852	2	0.056	0.112	0	Down	MGI:1916731
Actn1	ENSMUSG00000015143	14.1553	7.81392	10.9846	0.577297	0.547	0.315781	1.81155	Up	MGI:2137706	cell differentiation
Actn2	ENSMUSG00000052374	9.3858	6.81127	8.09854	0.317901	0.481	0.15291	1.37798	Up	MGI:109192	cell differentiation
Actn3	ENSMUSG00000006457	4.77343	7.10544	5.93943	0.392632	0.426	0.167261	-1.48854	Down	MGI:99678	cell differentiation
Actn4	ENSMUSG00000054808	76.4905	61.6416	69.066	0.214996	0.977	0.210051	1.24089	Up	MGI:1890773	cell differentiation
Actr10	ENSMUSG00000021076	38.0019	49.2343	43.6181	0.257517	0.914	0.23537	-1.29557	Down	MGI:1891654
Actr1a	ENSMUSG00000025228	35.2082	37.0791	36.1436	0.0517629	0.872	0.0451372	-1.05314	Down	MGI:1858964
Actr1b	ENSMUSG00000037351	32.2495	27.152	29.7007	0.171629	0.817	0.140221	1.18774	Up	MGI:1917446
Actr2	ENSMUSG00000020152	18.2619	25.5089	21.8854	0.331134	0.731	0.242059	-1.39684	Down	MGI:1913963	cell differentiation
Actr3	ENSMUSG00000026341	31.0107	50.3094	40.66	0.474635	0.899	0.426697	-1.62232	Down	MGI:1921367	cell differentiation
Actr3b	ENSMUSG00000056367	13.1911	16.9538	15.0724	0.249641	0.629	0.157024	-1.28525	Down	MGI:2661120
Actr5	ENSMUSG00000037761	13.5883	13.3923	13.4903	0.014529	0.598	0.00868832	1.01464	Up	MGI:1924748
Actr6	ENSMUSG00000019948	20.9756	32.5225	26.7491	0.431675	0.787	0.339728	-1.55049	Down	MGI:1914269
Actr8	ENSMUSG00000015971	27.9501	26.2634	27.1067	0.0622244	0.792	0.0492817	1.06422	Up	MGI:1860775
Actrt2	ENSMUSG00000051276	0	0.311001	0.155501	2	0.085	0.17	0	Down	MGI:1920603
Acvr1	ENSMUSG00000026836	16.2204	14.4131	15.3168	0.117995	0.632	0.0745728	1.12539	Up	MGI:87911	cell differentiation
Acvr1b	ENSMUSG00000000532	19.4518	17.6043	18.5281	0.0997137	0.68	0.0678053	1.10495	Up	MGI:1338944	cell differentiation
Acvr1c	ENSMUSG00000026834	0.115057	0.0691633	0.0921102	0.498248	0.041	0.0204282	1.66356	Up	MGI:2661081	cell proliferation;cell differentiation
Acvr2a	ENSMUSG00000052155	9.79595	13.3589	11.5774	0.30775	0.561	0.172648	-1.36372	Down	MGI:102806	cell proliferation;cell differentiation	abnormal male fertility
Acvr2b	ENSMUSG00000061393	5.88995	6.10131	5.99563	0.0352529	0.428	0.0150883	-1.03589	Down	MGI:87912	cell differentiation
Acvrl1	ENSMUSG00000000530	10.6273	4.67887	7.65308	0.777259	0.471	0.366089	2.27134	Up	MGI:1338946	cell proliferation;cell differentiation
Acy1	ENSMUSG00000023262	40.9942	26.0441	33.5191	0.446017	0.851	0.37956	1.57403	Up	MGI:87913
Acyp2	ENSMUSG00000060923	3.5846	3.9497	3.76715	0.0969168	0.367	0.0355685	-1.10185	Down	MGI:1922822
Ada	ENSMUSG00000017697	2.11769	1.3732	1.74545	0.426533	0.287	0.122415	1.54216	Up	MGI:87916	cell proliferation;cell differentiation
Adad1	ENSMUSG00000027719	14.1686	16.5976	15.3831	0.157901	0.634	0.100109	-1.17144	Down	MGI:103258	cell differentiation	abnormal male fertility
Adad2	ENSMUSG00000024266	25.5392	17.6199	21.5796	0.366982	0.726	0.266429	1.44945	Up	MGI:1923023
Adal	ENSMUSG00000027259	15.1529	13.0624	14.1076	0.148182	0.61	0.090391	1.16004	Up	MGI:1923144
Adam10	ENSMUSG00000054693	36.3284	53.6473	44.9879	0.384968	0.92	0.354171	-1.47673	Down	MGI:109548	cell proliferation
Adam11	ENSMUSG00000020926	1.31368	1.22792	1.2708	0.0674808	0.26	0.017545	1.06984	Up	MGI:1098667
Adam12	ENSMUSG00000054555	1.19453	0.859496	1.02701	0.326222	0.243	0.0792719	1.3898	Up	MGI:105378
Adam15	ENSMUSG00000028041	44.6398	38.9848	41.8123	0.135247	0.906	0.122534	1.14506	Up	MGI:1333882	cell differentiation
Adam17	ENSMUSG00000052593	18.0134	21.2402	19.6268	0.164408	0.699	0.114921	-1.17913	Down	MGI:1096335	cell proliferation;cell differentiation	abnormal male fertility
Adam19	ENSMUSG00000011256	2.10177	1.0488	1.57529	0.668431	0.279	0.186492	2.00398	Up	MGI:105377
Adam1a	ENSMUSG00000072647	0.363111	1.00671	0.68491	0.939683	0.207	0.194514	-2.77246	Down	MGI:2429504		abnormal male fertility
Adam1b	ENSMUSG00000062438	0.0457751	0.0803276	0.0630514	0.548006	0.012	0.00657607	-1.75483	Down	MGI:2429506
Adam2	ENSMUSG00000022039	0	0.116931	0.0584655	2	0.008	0.016	0	Down	MGI:1340894		abnormal male fertility
Adam21	ENSMUSG00000008438	0.0831355	0.169831	0.126483	0.685431	0.067	0.0459239	-2.04282	Down	MGI:1861229
Adam22	ENSMUSG00000040537	3.53249	3.92304	3.72776	0.104768	0.366	0.038345	-1.11056	Down	MGI:1340046	cell differentiation
Adam23	ENSMUSG00000025964	3.06566	2.36961	2.71764	0.256123	0.332	0.085033	1.29374	Up	MGI:1345162
Adam3	ENSMUSG00000031553	0.0453294	0.726849	0.386089	1.76519	0.161	0.284195	-16.0348	Down	MGI:102518		abnormal male fertility
Adam30	ENSMUSG00000043468	1.28665	0.923528	1.10509	0.328591	0.249	0.0818191	1.39319	Up	MGI:1918328
Adam32	ENSMUSG00000037437	0.140477	0.489836	0.315157	1.10853	0.145	0.160736	-3.48695	Down	MGI:2653822
Adam33	ENSMUSG00000027318	0.496214	0.431839	0.464027	0.138731	0.176	0.0244167	1.14907	Up	MGI:1341813	cell proliferation
Adam4	ENSMUSG00000072972	0.13033	0.204891	0.16761	0.444847	0.092	0.0409259	-1.57209	Down	MGI:104731
Adam5	ENSMUSG00000031554	0.0815349	0.425206	0.25337	1.3564	0.127	0.172263	-5.21502	Down	MGI:104730
Adam9	ENSMUSG00000031555	12.508	15.7914	14.1497	0.232047	0.611	0.141781	-1.2625	Down	MGI:105376
Adamdec1	ENSMUSG00000022057	0.144037	0.0899243	0.116981	0.462578	0.06	0.0277547	1.60176	Up	MGI:1917650
Adamts1	ENSMUSG00000022893	1.88061	0.928976	1.40479	0.677419	0.268	0.181548	2.02439	Up	MGI:109249	cell differentiation
Adamts10	ENSMUSG00000024299	13.673	9.27512	11.4741	0.383289	0.558	0.213875	1.47416	Up	MGI:2449112
Adamts12	ENSMUSG00000047497	0.0779074	0.0605254	0.0692164	0.251125	0.019	0.00477138	1.28719	Up	MGI:2146046	cell differentiation
Adamts14	ENSMUSG00000059901	2.81836	1.81703	2.3177	0.432037	0.316	0.136524	1.55108	Up	MGI:2179942
Adamts15	ENSMUSG00000033453	0.316535	0.238365	0.27745	0.281744	0.134	0.0377538	1.32794	Up	MGI:2449569
Adamts16	ENSMUSG00000049538	4.99423	0.683601	2.83892	1.51841	0.337	0.511703	7.30577	Up	MGI:2429637
Adamts17	ENSMUSG00000058145	3.05029	2.24895	2.64962	0.302436	0.329	0.0995014	1.35632	Up	MGI:3588195
Adamts18	ENSMUSG00000053399	0.130078	0.11293	0.121504	0.141131	0.064	0.00903239	1.15185	Up	MGI:2442600
Adamts19	ENSMUSG00000053441	2.02191	2.39849	2.2102	0.170383	0.311	0.052989	-1.18625	Down	MGI:2442875
Adamts2	ENSMUSG00000036545	5.02119	3.14569	4.08344	0.459294	0.377	0.173154	1.59621	Up	MGI:1347356		abnormal male fertility;abnormal spermatogenesis
Adamts20	ENSMUSG00000022449	0.601278	0.424007	0.512643	0.345798	0.184	0.0636269	1.41809	Up	MGI:2660628	cell differentiation
Adamts3	ENSMUSG00000043635	0.847888	0.6053	0.726594	0.33387	0.212	0.0707805	1.40077	Up	MGI:3045353
Adamts4	ENSMUSG00000006403	0.348972	0.387403	0.368188	0.104379	0.158	0.0164919	-1.11013	Down	MGI:1339949
Adamts5	ENSMUSG00000022894	0.387557	0.259569	0.323563	0.395558	0.148	0.0585426	1.49308	Up	MGI:1346321
Adamts6	ENSMUSG00000046169	0.38287	0.29241	0.33764	0.267918	0.151	0.0404557	1.30936	Up	MGI:1347348
Adamts7	ENSMUSG00000032363	16.093	9.15435	12.6237	0.549654	0.581	0.319349	1.75796	Up	MGI:1347346	cell differentiation
Adamts8	ENSMUSG00000031994	0.869916	0.509287	0.689601	0.522953	0.208	0.108774	1.70811	Up	MGI:1353468
Adamts9	ENSMUSG00000030022	18.4798	19.2236	18.8517	0.0394553	0.686	0.0270664	-1.04025	Down	MGI:1916320	cell differentiation
Adamtsl2	ENSMUSG00000036040	0.335615	0.0993289	0.217472	1.08651	0.113	0.122776	3.37883	Up	MGI:1925044
Adamtsl3	ENSMUSG00000070469	0.301588	0.149919	0.225753	0.671835	0.117	0.0786046	2.01167	Up	MGI:3028499
Adamtsl4	ENSMUSG00000015850	1.71013	1.15418	1.43215	0.388191	0.27	0.104812	1.48168	Up	MGI:2389008	cell differentiation
Adamtsl5	ENSMUSG00000043822	0.739153	0.750983	0.745068	0.0158777	0.214	0.00339784	-1.016	Down	MGI:1913798
Adap1	ENSMUSG00000056413	11.0403	8.59912	9.81971	0.2486	0.521	0.129521	1.28389	Up	MGI:2442201
Adap2	ENSMUSG00000020709	0.38077	0.358401	0.369586	0.0605246	0.158	0.00956288	1.06241	Up	MGI:2663075
Adar	ENSMUSG00000027951	15.9542	15.9746	15.9644	0.00127784	0.643	0.000821653	-1.00128	Down	MGI:1889575	cell differentiation
Adarb1	ENSMUSG00000020262	16.2993	14.5934	15.4463	0.11044	0.635	0.0701296	1.1169	Up	MGI:891999	cell proliferation;cell differentiation
Adat1	ENSMUSG00000031949	9.77894	8.50805	9.1435	0.138994	0.505	0.0701919	1.14938	Up	MGI:1353631
Adck1	ENSMUSG00000021044	10.246	11.2307	10.7383	0.0917026	0.542	0.0497028	-1.09611	Down	MGI:1919363
Adck5	ENSMUSG00000022550	26.2702	22.4661	24.3681	0.15611	0.763	0.119112	1.16933	Up	MGI:2679274
Adcy1	ENSMUSG00000020431	3.72526	3.11008	3.41767	0.18	0.357	0.0642599	1.1978	Up	MGI:99677	cell differentiation
Adcy10	ENSMUSG00000026567	4.68507	3.64665	4.16586	0.249269	0.379	0.094473	1.28476	Up	MGI:2660854		abnormal male fertility
Adcy2	ENSMUSG00000021536	2.41202	1.81465	2.11334	0.282667	0.307	0.0867788	1.32919	Up	MGI:99676
Adcy3	ENSMUSG00000020654	11.4236	9.36254	10.3931	0.198311	0.535	0.106096	1.22014	Up	MGI:99675		abnormal male fertility
Adcy4	ENSMUSG00000022220	0.42096	0.245213	0.333087	0.527632	0.15	0.0791448	1.71671	Up	MGI:99674
Adcy5	ENSMUSG00000022840	2.02592	1.49852	1.76222	0.299282	0.288	0.0861931	1.35195	Up	MGI:99673
Adcy6	ENSMUSG00000022994	6.29787	6.07207	6.18497	0.0365079	0.433	0.0158079	1.03719	Up	MGI:87917	cell differentiation
Adcy7	ENSMUSG00000031659	5.85423	3.43792	4.64607	0.520076	0.393	0.20439	1.70284	Up	MGI:102891
Adcy9	ENSMUSG00000005580	14.6983	12.0264	13.3623	0.199957	0.596	0.119175	1.22217	Up	MGI:108450
Adcyap1	ENSMUSG00000024256	0.103294	0.0552514	0.0792727	0.606042	0.029	0.0175752	1.86953	Up	MGI:105094	cell proliferation;cell differentiation
Adcyap1r1	ENSMUSG00000029778	8.31049	3.88397	6.09723	0.725989	0.431	0.312901	2.13969	Up	MGI:108449	cell differentiation
Add1	ENSMUSG00000029106	51.7217	54.3128	53.0173	0.0488728	0.948	0.0463314	-1.0501	Down	MGI:87918	cell differentiation
Add2	ENSMUSG00000030000	2.60239	2.35409	2.47824	0.100192	0.323	0.032362	1.10548	Up	MGI:87919
Add3	ENSMUSG00000025026	34.7806	42.177	38.4788	0.19222	0.887	0.170499	-1.21266	Down	MGI:1351615
Adh1	ENSMUSG00000074207	28.7479	10.0193	19.3836	0.966209	0.695	0.671515	2.86925	Up	MGI:87921
Adh4	ENSMUSG00000037797	2.8095	2.78026	2.79488	0.010462	0.334	0.0034943	1.01052	Up	MGI:1349472
Adh5	ENSMUSG00000028138	67.6106	81.2773	74.444	0.183584	0.983	0.180463	-1.20214	Down	MGI:87929
Adh6a	ENSMUSG00000053054	0.187721	0.130995	0.159358	0.355966	0.088	0.031325	1.43304	Up	MGI:1916367
Adh7	ENSMUSG00000055301	0.0871941	0.0851059	0.08615	0.0242391	0.036	0.000872608	1.02454	Up	MGI:87926
Adi1	ENSMUSG00000020629	18.8879	24.3323	21.6101	0.251938	0.727	0.183159	-1.28825	Down	MGI:2144929
Adig	ENSMUSG00000044405	0	0.139409	0.0697045	2	0.02	0.04	0	Down	MGI:2675492	cell differentiation
Adipoq	ENSMUSG00000022878	0.1296	0.0545621	0.0920809	0.814911	0.041	0.0334113	2.37527	Up	MGI:106675	cell proliferation;cell differentiation
Adipor1	ENSMUSG00000026457	48.5874	54.7056	51.6465	0.118463	0.945	0.111948	-1.12592	Down	MGI:1919924	cell differentiation
Adipor2	ENSMUSG00000030168	36.9503	40.4122	38.6812	0.0894981	0.888	0.0794743	-1.09369	Down	MGI:93830		abnormal spermatogenesis
Adk	ENSMUSG00000039197	26.6639	34.4693	30.5666	0.255357	0.826	0.210925	-1.29273	Down	MGI:87930	cell proliferation
Adm	ENSMUSG00000030790	1.35488	0.954078	1.15448	0.347171	0.252	0.0874872	1.42009	Up	MGI:108058	cell proliferation;cell differentiation
Adm2	ENSMUSG00000054136	0.371564	0.095106	0.233335	1.18481	0.119	0.140993	3.90684	Up	MGI:2675256
Adnp	ENSMUSG00000051149	0.140611	0.14666	0.143636	0.0421135	0.078	0.00328486	-1.04302	Down	MGI:1338758	cell differentiation
Adnp2	ENSMUSG00000053950	19.5084	22.4089	20.9586	0.138392	0.718	0.0993651	-1.14868	Down	MGI:2448562	cell differentiation
Ado	ENSMUSG00000057134	10.188	8.87198	9.53	0.138095	0.515	0.0711192	1.14834	Up	MGI:2685083
Adora1	ENSMUSG00000042429	41.5538	49.3384	45.4461	0.171293	0.922	0.157932	-1.18734	Down	MGI:99401	cell proliferation
Adora2a	ENSMUSG00000020178	0.5561	0.593503	0.574801	0.0650712	0.193	0.0125587	-1.06726	Down	MGI:99402	cell proliferation;cell differentiation
Adora2b	ENSMUSG00000018500	2.88541	3.11233	2.99887	0.0756685	0.343	0.0259543	-1.07864	Down	MGI:99403	cell proliferation
Adora3	ENSMUSG00000000562	0.109604	0.0755419	0.0925729	0.367949	0.042	0.0154538	1.4509	Up	MGI:104847	cell proliferation
Adpgk	ENSMUSG00000025236	23.9668	24.12	24.0434	0.00637181	0.758	0.00482983	-1.00639	Down	MGI:1919391
Adprh	ENSMUSG00000002844	50.739	50.2382	50.4886	0.00991907	0.941	0.00933385	1.00997	Up	MGI:1098234
Adprhl1	ENSMUSG00000031448	0.126652	0.204218	0.165435	0.468861	0.091	0.0426663	-1.61243	Down	MGI:2442168
Adprhl2	ENSMUSG00000042558	25.6367	25.9388	25.7878	0.0117149	0.778	0.00911416	-1.01178	Down	MGI:2140364
Adra1d	ENSMUSG00000027335	0.0415674	0.0898894	0.0657284	0.735177	0.015	0.0110277	-2.1625	Down	MGI:106673
Adra2a	ENSMUSG00000033717	0.500266	0.478942	0.489604	0.0435536	0.18	0.00783964	1.04452	Up	MGI:87934
Adra2b	ENSMUSG00000058620	0.428097	0.579092	0.503595	0.299834	0.182	0.0545699	-1.35271	Down	MGI:87935	cell differentiation
Adra2c	ENSMUSG00000045318	1.04003	0.880194	0.960112	0.166476	0.236	0.0392884	1.18159	Up	MGI:87936	cell differentiation
Adrb1	ENSMUSG00000035283	1.10287	0.55994	0.831405	0.653027	0.224	0.146278	1.96962	Up	MGI:87937	cell differentiation
Adrb2	ENSMUSG00000045730	0.110548	0.2423	0.176424	0.746792	0.096	0.071692	-2.19181	Down	MGI:87938	cell proliferation;cell differentiation
Adrb3	ENSMUSG00000031489	0.123331	0.261026	0.192178	0.716495	0.104	0.0745155	-2.11647	Down	MGI:87939	cell differentiation
Adrbk1	ENSMUSG00000024858	35.3298	32.6846	34.0072	0.0777835	0.855	0.0665049	1.08093	Up	MGI:87940
Adrbk2	ENSMUSG00000042249	2.00418	1.37057	1.68737	0.3755	0.284	0.106642	1.4623	Up	MGI:87941
Adss	ENSMUSG00000015961	43.4678	60.8084	52.1381	0.33259	0.946	0.31463	-1.39893	Down	MGI:87948
Aebp1	ENSMUSG00000020473	17.3758	12.1315	14.7537	0.355458	0.622	0.221095	1.43229	Up	MGI:1197012
Aebp2	ENSMUSG00000030232	7.38908	7.57262	7.48085	0.0245346	0.467	0.0114577	-1.02484	Down	MGI:1338038
Aen	ENSMUSG00000030609	54.3593	47.1066	50.733	0.142958	0.942	0.134667	1.15396	Up	MGI:1915298
Aes	ENSMUSG00000054452	106.213	94.8795	100.546	0.112719	0.994	0.112043	1.11945	Up	MGI:95806
AF366264	ENSMUSG00000057116	0.0296225	0.108297	0.0689598	1.14088	0.019	0.0216766	-3.6559	Down	MGI:2667157
AF529169	ENSMUSG00000039313	0.66445	0.171389	0.417919	1.1798	0.168	0.198206	3.87685	Up	MGI:2667167
Afap1l1	ENSMUSG00000033032	6.9498	5.25049	6.10014	0.278569	0.431	0.120063	1.32365	Up	MGI:2147199
Afap1l2	ENSMUSG00000025083	7.44318	3.51143	5.4773	0.717826	0.415	0.297898	2.1197	Up	MGI:2147658
Aff1	ENSMUSG00000029313	15.2049	7.94368	11.5743	0.627358	0.56	0.35132	1.91409	Up	MGI:1100819		abnormal male fertility
Aff2	ENSMUSG00000031189	2.30388	2.31216	2.30802	0.00358749	0.315	0.00113006	-1.00359	Down	MGI:1202294
Aff3	ENSMUSG00000037138	17.9778	11.3016	14.6397	0.456034	0.619	0.282285	1.59073	Up	MGI:106927
Aff4	ENSMUSG00000049470	13.1563	20.1377	16.647	0.419379	0.653	0.273854	-1.53065	Down	MGI:2136171	cell differentiation	abnormal male fertility
Afg3l1	ENSMUSG00000031967	26.7835	25.7288	26.2561	0.0401696	0.783	0.0314528	1.04099	Up	MGI:1928277
Afmid	ENSMUSG00000017718	10.1053	8.78292	9.44411	0.140022	0.513	0.0718311	1.15056	Up	MGI:2448704
Afp	ENSMUSG00000054932	8.79473	6.19689	7.49581	0.346572	0.467	0.161849	1.41922	Up	MGI:87951
Aftph	ENSMUSG00000049659	24.2459	32.815	28.5304	0.300349	0.806	0.242082	-1.35342	Down	MGI:1923012
Aga	ENSMUSG00000031521	15.2234	17.7901	16.5068	0.155494	0.65	0.101071	-1.1686	Down	MGI:104873
Agap1	ENSMUSG00000055013	23.2746	18.6087	20.9416	0.222805	0.718	0.159974	1.25074	Up	MGI:2653690
Agap2	ENSMUSG00000025422	3.54361	1.59306	2.56834	0.759461	0.326	0.247584	2.2244	Up	MGI:3580016	cell proliferation
Agap3	ENSMUSG00000023353	76.3302	65.1529	70.7416	0.158002	0.979	0.154684	1.17155	Up	MGI:2183446
Agbl1	ENSMUSG00000025754	0.0620751	0.240102	0.151089	1.1783	0.083	0.0977985	-3.86793	Down	MGI:3646469
Agbl2	ENSMUSG00000040812	1.0385	1.15229	1.09539	0.10388	0.248	0.0257623	-1.10957	Down	MGI:2443254
Agbl4	ENSMUSG00000061298	0.747659	2.69316	1.72041	1.13084	0.286	0.323419	-3.60212	Down	MGI:1918244
Agbl5	ENSMUSG00000029165	29.0698	22.397	25.7334	0.259305	0.777	0.20148	1.29793	Up	MGI:2441745
Ager	ENSMUSG00000015452	0.783826	1.00195	0.892888	0.24429	0.231	0.0564311	-1.27828	Down	MGI:893592	cell proliferation;cell differentiation
Agfg1	ENSMUSG00000026159	27.8545	28.8134	28.334	0.0338428	0.804	0.0272096	-1.03443	Down	MGI:1333754	cell differentiation	abnormal male fertility
Agfg2	ENSMUSG00000029722	29.2621	28.3943	28.8282	0.0301025	0.809	0.0243529	1.03056	Up	MGI:2443267
Aggf1	ENSMUSG00000021681	37.2701	41.66	39.465	0.111235	0.893	0.099333	-1.11779	Down	MGI:1913799	cell proliferation;cell differentiation
Agk	ENSMUSG00000029916	8.49962	7.41002	7.95482	0.136974	0.477	0.0653364	1.14704	Up	MGI:1917173
Agl	ENSMUSG00000033400	5.9264	7.68921	6.80781	0.25894	0.45	0.116523	-1.29745	Down	MGI:1924809
Agmat	ENSMUSG00000040706	0.125558	0.0842468	0.104902	0.393806	0.051	0.0200841	1.49036	Up	MGI:1923236
Agmo	ENSMUSG00000050103	0.0523842	0.330214	0.191299	1.45233	0.103	0.14959	-6.30369	Down	MGI:2442495
Agpat1	ENSMUSG00000034254	40.2295	35.612	37.9207	0.121767	0.883	0.10752	1.12966	Up	MGI:1932075
Agpat2	ENSMUSG00000026922	7.95921	4.41371	6.18646	0.573106	0.433	0.248155	1.80329	Up	MGI:1914762
Agpat3	ENSMUSG00000001211	28.5743	29.011	28.7927	0.0151671	0.809	0.0122702	-1.01528	Down	MGI:1336186		abnormal male fertility
Agpat4	ENSMUSG00000023827	33.0198	39.6059	36.3128	0.181371	0.873	0.158337	-1.19946	Down	MGI:1915512
Agpat5	ENSMUSG00000031467	14.8518	16.3647	15.6082	0.0969295	0.638	0.061841	-1.10187	Down	MGI:1196345	cell differentiation
Agpat9	ENSMUSG00000029314	0.113679	0.0869549	0.100317	0.266397	0.048	0.012787	1.30733	Up	MGI:3603816
Agps	ENSMUSG00000042410	11.8181	14.5002	13.1591	0.203826	0.591	0.120461	-1.22696	Down	MGI:2443065		abnormal male fertility
Agrn	ENSMUSG00000041936	28.3308	29.0356	28.6832	0.0245719	0.808	0.0198541	-1.02488	Down	MGI:87961	cell differentiation
Agt	ENSMUSG00000031980	22.6404	7.063	14.8517	1.04886	0.624	0.654491	3.20549	Up	MGI:87963	cell proliferation;cell differentiation
Agtpbp1	ENSMUSG00000021557	14.0757	14.9166	14.4962	0.0580085	0.617	0.0357912	-1.05974	Down	MGI:2159437	cell differentiation	abnormal male fertility
Agtr1a	ENSMUSG00000049115	0.663527	0.184829	0.424178	1.12853	0.169	0.190722	3.58995	Up	MGI:87964	cell proliferation
Agtr2	ENSMUSG00000068122	0.858378	0.836555	0.847467	0.0257509	0.226	0.0058197	1.02609	Up	MGI:87966	cell proliferation;cell differentiation
Agtrap	ENSMUSG00000029007	13.1354	15.7291	14.4322	0.179716	0.616	0.110705	-1.19746	Down	MGI:1339977
Ahctf1	ENSMUSG00000026491	27.6872	33.1477	30.4175	0.179519	0.824	0.147923	-1.19722	Down	MGI:1915033
Ahcy	ENSMUSG00000027597	20.416	21.0309	20.7234	0.0296717	0.715	0.0212153	-1.03012	Down	MGI:87968
Ahcyl1	ENSMUSG00000027893	33.5199	37.8077	35.6638	0.120228	0.87	0.104599	-1.12792	Down	MGI:2385184
Ahcyl2	ENSMUSG00000029772	24.0988	26.5945	25.3467	0.0984627	0.773	0.0761117	-1.10356	Down	MGI:1921590
Ahi1	ENSMUSG00000019986	13.0356	11.8787	12.4572	0.0928704	0.578	0.0536791	1.09739	Up	MGI:87971	cell differentiation
Ahnak	ENSMUSG00000069833	1.56877	2.06786	1.81832	0.274479	0.292	0.080148	-1.31814	Down	MGI:1316648
Ahr	ENSMUSG00000019256	4.19783	4.36845	4.28314	0.0398353	0.384	0.0152967	-1.04064	Down	MGI:105043	cell proliferation;cell differentiation
Ahrr	ENSMUSG00000021575	0.524337	0.43869	0.481514	0.17787	0.179	0.0318388	1.19523	Up	MGI:1333776
Ahsa1	ENSMUSG00000021037	71.9997	67.0347	69.5172	0.0714212	0.978	0.0698499	1.07407	Up	MGI:2387603
Ahsg	ENSMUSG00000022868	8.30736	8.59968	8.45352	0.0345797	0.488	0.0168749	-1.03519	Down	MGI:107189
AI182371	ENSMUSG00000035875	0.790466	0.574384	0.682425	0.316638	0.207	0.0655442	1.3762	Up	MGI:2138853
AI314180	ENSMUSG00000050812	30.0439	39.1579	34.6009	0.263404	0.86	0.226527	-1.30336	Down	MGI:2140220
AI413582	ENSMUSG00000062753	13.8773	11.0529	12.4651	0.226585	0.578	0.130966	1.25553	Up	MGI:2146839
AI429214	ENSMUSG00000074384	2.20064	1.57283	1.88673	0.332749	0.296	0.0984938	1.39916	Up	MGI:2142538
AI464131	ENSMUSG00000046312	1.18204	0.625692	0.903866	0.61552	0.232	0.142801	1.88917	Up	MGI:2140300	cell differentiation
AI467606	ENSMUSG00000045165	0.452757	0.357517	0.405137	0.235081	0.165	0.0387884	1.26639	Up	MGI:2141979
AI597479	ENSMUSG00000010290	11.2623	17.0617	14.162	0.409504	0.611	0.250207	-1.51494	Down	MGI:2138299
AI607873	ENSMUSG00000073490	0.152664	0.163945	0.158305	0.0712614	0.087	0.00619974	-1.07389	Down	MGI:2138302
AI661453	ENSMUSG00000034382	11.8671	6.15598	9.01154	0.633756	0.502	0.318146	1.92774	Up	MGI:2146908
AI846148	ENSMUSG00000024970	21.0823	20.061	20.5716	0.049646	0.713	0.0353976	1.05091	Up	MGI:2147611
AI854703	ENSMUSG00000053297	2.17449	1.40588	1.79019	0.429347	0.29	0.124511	1.54671	Up	MGI:2141510
AI987944	ENSMUSG00000056383	1.90525	2.73656	2.3209	0.358179	0.316	0.113185	-1.43632	Down	MGI:2142079
Aicda	ENSMUSG00000040627	0.0442759	0.143812	0.094044	1.0584	0.043	0.0455112	-3.24809	Down	MGI:1342279
Aif1	ENSMUSG00000024397	0.845104	1.44722	1.14616	0.525332	0.252	0.132384	-1.71248	Down	MGI:1343098	cell proliferation
Aif1l	ENSMUSG00000001864	2.65685	4.61271	3.63478	0.538096	0.363	0.195329	-1.73616	Down	MGI:1919598
Aifm1	ENSMUSG00000036932	37.2891	41.2005	39.2448	0.0996667	0.891	0.088803	-1.10489	Down	MGI:1349419	cell differentiation
Aifm2	ENSMUSG00000020085	14.5971	13.2613	13.9292	0.0958993	0.607	0.0582109	1.10073	Up	MGI:1918611
Aifm3	ENSMUSG00000022763	29.8545	30.1034	29.979	0.00830249	0.82	0.00680804	-1.00834	Down	MGI:1919418
Aig1	ENSMUSG00000019806	5.56643	9.28665	7.42654	0.500936	0.466	0.233436	-1.66833	Down	MGI:1913503
Aim1l	ENSMUSG00000012123	4.00732	3.07402	3.54067	0.263594	0.36	0.0948939	1.30361	Up	MGI:1334463
Aim2	ENSMUSG00000037860	0.823137	0.393097	0.608117	0.707167	0.197	0.139312	2.09398	Up	MGI:2686159
Aimp1	ENSMUSG00000028029	43.2808	45.6829	44.4818	0.0540018	0.917	0.0495197	-1.0555	Down	MGI:102774	cell proliferation
Aip	ENSMUSG00000097319	30.3018	23.5869	26.9444	0.249214	0.79	0.196879	1.28469	Up
Aipl1	ENSMUSG00000040554	9.33318	1.10898	5.22108	1.57519	0.409	0.644253	8.416	Up	MGI:2148800
Ajap1	ENSMUSG00000039546	0.51219	0.499482	0.505836	0.0251228	0.182	0.00457234	1.02544	Up	MGI:2685419	cell differentiation
Ak2	ENSMUSG00000028792	46.6298	41.564	44.0969	0.114879	0.916	0.105229	1.12188	Up	MGI:87978
Ak4	ENSMUSG00000028527	14.72	16.7292	15.7246	0.127774	0.639	0.0816478	-1.13649	Down	MGI:87979
Ak5	ENSMUSG00000039058	0.221502	0.204076	0.212789	0.0818933	0.111	0.00909016	1.08539	Up	MGI:2677491
Ak7	ENSMUSG00000041323	3.58637	2.14158	2.86397	0.50447	0.337	0.170006	1.67464	Up	MGI:1926051		abnormal male fertility
Ak8	ENSMUSG00000026807	10.2173	6.03851	8.12791	0.514129	0.481	0.247296	1.69202	Up	MGI:1916120
Akap1	ENSMUSG00000018428	33.0419	23.7279	28.3849	0.328132	0.805	0.264146	1.39253	Up	MGI:104729
Akap10	ENSMUSG00000047804	10.5272	15.411	12.9691	0.376572	0.588	0.221424	-1.46392	Down	MGI:1890218
Akap11	ENSMUSG00000022016	27.2156	33.6466	30.4311	0.21133	0.824	0.174136	-1.2363	Down	MGI:2684060
Akap12	ENSMUSG00000038587	34.227	50.929	42.578	0.392268	0.909	0.356572	-1.48798	Down	MGI:1932576		abnormal male fertility
Akap13	ENSMUSG00000066406	22.4379	24.2787	23.3583	0.0788071	0.749	0.0590265	-1.08204	Down	MGI:2676556	cell differentiation
Akap14	ENSMUSG00000036551	0	0.210114	0.105057	2	0.051	0.102	0	Down	MGI:3618288
Akap17b	ENSMUSG00000059708	8.87136	12.4958	10.6836	0.339253	0.541	0.183536	-1.40856	Down	MGI:2443758
Akap2	ENSMUSG00000038729	7.22437	5.95508	6.58972	0.192617	0.444	0.0855217	1.21314	Up	MGI:1306795
Akap3	ENSMUSG00000030344	0.968439	3.85188	2.41016	1.19637	0.32	0.382838	-3.97741	Down	MGI:1341149
Akap4	ENSMUSG00000050089	0.535892	1.17353	0.854711	0.746028	0.226	0.168602	-2.18986	Down	MGI:102794		abnormal male fertility
Akap5	ENSMUSG00000021057	1.57162	1.48626	1.52894	0.0558295	0.275	0.0153531	1.05743	Up	MGI:2685104	cell differentiation
Akap6	ENSMUSG00000061603	0.873768	0.638026	0.755897	0.311871	0.216	0.067364	1.36949	Up	MGI:3050566	cell differentiation
Akap7	ENSMUSG00000039166	9.67171	14.5816	12.1267	0.404884	0.572	0.231594	-1.50765	Down	MGI:1859150
Akap9	ENSMUSG00000040407	14.7072	17.7712	16.2392	0.188679	0.647	0.122075	-1.20833	Down	MGI:2178217	cell differentiation	abnormal male fertility;abnormal spermatogenesis
Akirin1	ENSMUSG00000023075	27.9116	37.915	32.9133	0.303932	0.846	0.257126	-1.3584	Down	MGI:1915300
Akirin2	ENSMUSG00000028291	74.4772	94.7528	84.615	0.239622	0.989	0.236986	-1.27224	Down	MGI:1889364	cell proliferation
Akna	ENSMUSG00000039158	5.18518	3.19774	4.19146	0.474164	0.381	0.180657	1.62151	Up	MGI:2140340
Aknad1	ENSMUSG00000049565	0.0479146	0.0903623	0.0691385	0.613952	0.019	0.0116651	-1.8859	Down	MGI:3584453
Akp3	ENSMUSG00000036500	0	0.184468	0.092234	2	0.041	0.082	0	Down	MGI:87984	cell differentiation
Akr1b3	ENSMUSG00000001642	11.3384	14.2616	12.8	0.228375	0.585	0.133599	-1.25781	Down	MGI:1353494	cell proliferation
Akr1b8	ENSMUSG00000029762	57.1238	59.9523	58.538	0.048319	0.962	0.0464829	-1.04952	Down	MGI:107673
Akr1c12	ENSMUSG00000021211	0.598863	0.439532	0.519197	0.306879	0.184	0.0564658	1.3625	Up	MGI:1351661
Akr1c13	ENSMUSG00000021213	0.603612	0.478777	0.541195	0.230666	0.188	0.0433651	1.26074	Up	MGI:1351662
Akr1c14	ENSMUSG00000033715	2.08901	1.35772	1.72337	0.424338	0.286	0.121361	1.53862	Up	MGI:2145458
Akr1c18	ENSMUSG00000021214	0.108562	0	0.054281	2	0.004	0.008	0	Up	MGI:2145420	cell proliferation
Akr1cl	ENSMUSG00000025955	37.6639	34.0932	35.8786	0.0995219	0.871	0.0866835	1.10473	Up	MGI:1918111
Akr1e1	ENSMUSG00000045410	14.8701	12.8009	13.8355	0.149557	0.605	0.0904822	1.16164	Up	MGI:1914758
Akr7a5	ENSMUSG00000028743	70.7793	64.4202	67.5998	0.0940699	0.976	0.0918122	1.09871	Up	MGI:107796
Akt1s1	ENSMUSG00000011096	36.8514	34.6928	35.7721	0.0603431	0.87	0.0524985	1.06222	Up	MGI:1914855
Akt2	ENSMUSG00000004056	24.408	26.1118	25.2599	0.0674508	0.772	0.052072	-1.0698	Down	MGI:104874	cell proliferation;cell differentiation
Akt3	ENSMUSG00000019699	9.11671	10.0872	9.60196	0.101072	0.517	0.0522543	-1.10645	Down	MGI:1345147
Aktip	ENSMUSG00000031667	21.303	25.2757	23.2893	0.17058	0.748	0.127594	-1.18649	Down	MGI:3693832
Alad	ENSMUSG00000028393	30.5163	36.3384	33.4274	0.174172	0.851	0.14822	-1.19079	Down	MGI:96853
Alas1	ENSMUSG00000032786	13.5931	11.5051	12.5491	0.166388	0.58	0.096505	1.18149	Up	MGI:87989
Alas2	ENSMUSG00000025270	1.51348	1.47685	1.49517	0.024499	0.273	0.00668822	1.0248	Up	MGI:87990	cell differentiation
Alb	ENSMUSG00000029368	0.236162	0.0566398	0.146401	1.22624	0.079	0.0968727	4.16954	Up	MGI:87991
Alcam	ENSMUSG00000022636	9.12365	17.4708	13.2972	0.627736	0.594	0.372875	-1.91489	Down	MGI:1313266	cell differentiation
Aldh16a1	ENSMUSG00000007833	16.5521	15.8388	16.1955	0.0440432	0.646	0.0284519	1.04503	Up	MGI:1916998
Aldh18a1	ENSMUSG00000025007	18.7473	14.1599	16.4536	0.278808	0.65	0.181225	1.32397	Up	MGI:1888908
Aldh1a1	ENSMUSG00000053279	94.0473	112.552	103.3	0.179136	0.995	0.17824	-1.19676	Down	MGI:1353450
Aldh1a2	ENSMUSG00000013584	27.7565	40.2735	34.015	0.367985	0.855	0.314627	-1.45096	Down	MGI:107928	cell proliferation;cell differentiation
Aldh1a3	ENSMUSG00000015134	1.76726	1.76369	1.76547	0.00202212	0.288	0.00058237	1.00202	Up	MGI:1861722
Aldh1a7	ENSMUSG00000024747	5.35988	10.4797	7.91979	0.646459	0.476	0.307715	-1.95521	Down	MGI:1347050
Aldh1b1	ENSMUSG00000035561	13.5636	8.80388	11.1837	0.425593	0.552	0.234927	1.54064	Up	MGI:1919785
Aldh1l2	ENSMUSG00000020256	0.732863	0.805034	0.768949	0.0938567	0.217	0.0203669	-1.09848	Down	MGI:2444680
Aldh2	ENSMUSG00000029455	63.9614	63.3549	63.6581	0.00952745	0.969	0.0092321	1.00957	Up	MGI:99600
Aldh3a1	ENSMUSG00000019102	0.84444	0.206612	0.525526	1.21369	0.186	0.225747	4.08708	Up	MGI:1353451	cell proliferation
Aldh3a2	ENSMUSG00000010025	32.9795	39.311	36.1453	0.175168	0.872	0.152747	-1.19198	Down	MGI:1353452
Aldh4a1	ENSMUSG00000028737	14.108	12.279	13.1935	0.138629	0.591	0.0819297	1.14895	Up	MGI:2443883
Aldh7a1	ENSMUSG00000053644	46.2326	45.3793	45.8059	0.0186286	0.924	0.0172128	1.0188	Up	MGI:108186
Aldh9a1	ENSMUSG00000026687	37.2081	41.4428	39.3255	0.107683	0.892	0.0960536	-1.11381	Down	MGI:1861622
Aldoa	ENSMUSG00000030695	74.0404	69.8646	71.9525	0.0580355	0.98	0.0568748	1.05977	Up	MGI:87994
Aldoart1	ENSMUSG00000059343	7.68219	7.85938	7.77079	0.0228021	0.474	0.0108082	-1.02307	Down	MGI:2447811
Aldoart2	ENSMUSG00000063129	7.53599	7.33643	7.43621	0.0268363	0.466	0.0125057	1.0272	Up	MGI:1931052
Aldoc	ENSMUSG00000017390	28.8816	22.2515	25.5665	0.259327	0.775	0.200979	1.29796	Up	MGI:101863
Alg1	ENSMUSG00000039427	14.0161	13.9401	13.9781	0.00543708	0.608	0.00330574	1.00545	Up	MGI:2384774
Alg10b	ENSMUSG00000075470	15.1256	21.0716	18.0986	0.328534	0.674	0.221432	-1.39311	Down	MGI:2146159	cell differentiation
Alg11	ENSMUSG00000063362	7.0305	8.92194	7.97622	0.237135	0.478	0.11335	-1.26903	Down	MGI:2142632
Alg12	ENSMUSG00000035845	10.013	8.44745	9.23023	0.169611	0.507	0.0859929	1.18533	Up	MGI:2385025
Alg13	ENSMUSG00000041718	16.4905	22.8081	19.6493	0.321518	0.699	0.224741	-1.38311	Down	MGI:1914824
Alg14	ENSMUSG00000039887	7.52337	7.89427	7.70882	0.0481137	0.472	0.0227097	-1.0493	Down	MGI:1914039
Alg2	ENSMUSG00000039740	22.6325	24.3517	23.4921	0.073182	0.75	0.0548865	-1.07596	Down	MGI:1914731
Alg3	ENSMUSG00000033809	27.7618	23.3465	25.5541	0.172782	0.775	0.133906	1.18912	Up	MGI:1098592
Alg5	ENSMUSG00000036632	9.72722	14.8451	12.2862	0.416557	0.575	0.23952	-1.52614	Down	MGI:1913498
Alg6	ENSMUSG00000073792	3.98923	5.15524	4.57224	0.25502	0.392	0.0999677	-1.29229	Down	MGI:2444031
Alg8	ENSMUSG00000035704	14.3811	14.7072	14.5442	0.0224214	0.618	0.0138564	-1.02268	Down	MGI:2141959
Alg9	ENSMUSG00000032059	18.0496	16.498	17.2738	0.0898239	0.663	0.0595532	1.09405	Up	MGI:1924753
Alk	ENSMUSG00000055471	0.215987	0.0834372	0.149712	0.885365	0.082	0.0725999	2.58862	Up	MGI:103305	cell proliferation;cell differentiation	abnormal male fertility
Alkbh2	ENSMUSG00000044339	28.3948	21.3836	24.8892	0.281696	0.768	0.216343	1.32788	Up	MGI:2141032
Alkbh3	ENSMUSG00000040174	5.96205	7.81259	6.88732	0.268687	0.452	0.121447	-1.31039	Down	MGI:1916363	cell proliferation
Alkbh4	ENSMUSG00000039754	11.7442	10.6756	11.2099	0.0953265	0.553	0.0527155	1.1001	Up	MGI:1919291
Alkbh5	ENSMUSG00000042650	35.796	48.7094	42.2527	0.305623	0.907	0.2772	-1.36075	Down	MGI:2144489	cell differentiation	abnormal male fertility
Alkbh6	ENSMUSG00000042831	33.1802	28.7615	30.9708	0.142673	0.83	0.118418	1.15363	Up	MGI:2142037
Alkbh7	ENSMUSG00000002661	14.5953	9.98196	12.2886	0.375415	0.575	0.215864	1.46217	Up	MGI:1913650
Alkbh8	ENSMUSG00000025899	4.27696	6.59467	5.43581	0.426378	0.414	0.17652	-1.54191	Down	MGI:1914917
Allc	ENSMUSG00000020636	0.0855782	0.170827	0.128203	0.664954	0.068	0.0452169	-1.99615	Down	MGI:2136971
Alox12	ENSMUSG00000000320	0.718224	0.807535	0.762879	0.117071	0.216	0.0252873	-1.12435	Down	MGI:87998	cell proliferation;cell differentiation
Alox12b	ENSMUSG00000032807	4.43198	3.26128	3.84663	0.304344	0.37	0.112607	1.35897	Up	MGI:1274782
Alox12e	ENSMUSG00000018907	0.255678	0.207463	0.231571	0.208209	0.119	0.0247768	1.2324	Up	MGI:1274790
Alox15	ENSMUSG00000018924	0.604816	0.233421	0.419119	0.886134	0.168	0.14887	2.5911	Up	MGI:87997
Alox5	ENSMUSG00000025701	0.255421	0.113031	0.184226	0.772909	0.099	0.076518	2.25974	Up	MGI:87999
Alox5ap	ENSMUSG00000060063	1.36928	1.29598	1.33263	0.055004	0.264	0.0145211	1.05656	Up	MGI:107505
Alox8	ENSMUSG00000020891	0.390319	0.405942	0.398131	0.0392409	0.164	0.00643551	-1.04003	Down	MGI:1098228	cell proliferation;cell differentiation
Aloxe3	ENSMUSG00000020892	3.54088	3.10256	3.32172	0.131956	0.354	0.0467123	1.14128	Up	MGI:1345140	cell differentiation
Alpi	ENSMUSG00000079440	0.0747491	0.136976	0.105863	0.587808	0.052	0.030566	-1.83248	Down	MGI:1924018
Alpk1	ENSMUSG00000028028	1.95319	2.08772	2.02046	0.066584	0.303	0.020175	-1.06888	Down	MGI:1918731
Alpk3	ENSMUSG00000038763	0.182804	0.13119	0.156997	0.328758	0.086	0.0282732	1.39343	Up	MGI:2151224	cell differentiation
Alpl	ENSMUSG00000028766	23.5512	12.028	17.7896	0.647749	0.67	0.433992	1.95803	Up	MGI:87983
Alppl2	ENSMUSG00000026246	0.148061	0.119182	0.133622	0.216119	0.072	0.0155606	1.2423	Up	MGI:108009
Als2cl	ENSMUSG00000044037	8.27773	7.00902	7.64337	0.165988	0.471	0.0781804	1.18101	Up	MGI:2447532
Als2cr11	ENSMUSG00000072295	2.35972	2.64014	2.49993	0.112171	0.324	0.0363434	-1.11884	Down	MGI:1920713
Als2cr12	ENSMUSG00000047528	0.243245	0.0969432	0.170094	0.860123	0.093	0.0799914	2.50915	Up	MGI:1918359
Alx1	ENSMUSG00000036602	0.109601	0.0447394	0.0771702	0.840501	0.028	0.023534	2.44976	Up	MGI:104621	cell differentiation
Alx3	ENSMUSG00000014603	0.555553	0.302065	0.428809	0.591144	0.17	0.100495	1.83918	Up	MGI:1277097
Amacr	ENSMUSG00000022244	4.27331	3.03914	3.65623	0.337553	0.364	0.122869	1.40609	Up	MGI:1098273
Ambp	ENSMUSG00000028356	0.0855646	0.0625906	0.0740776	0.310134	0.025	0.00775336	1.36705	Up	MGI:88002
Ambra1	ENSMUSG00000040506	25.201	18.5271	21.864	0.305246	0.73	0.22283	1.36022	Up	MGI:2443564	cell proliferation;cell differentiation
Amd1	ENSMUSG00000075232	26.57	39.2758	32.9229	0.385926	0.847	0.326879	-1.4782	Down	MGI:88004
Amfr	ENSMUSG00000031751	44.3622	63.6118	53.987	0.35656	0.951	0.339088	-1.43392	Down	MGI:1345634
Amica1	ENSMUSG00000048534	0.0343287	0.112978	0.0736533	1.06783	0.024	0.0256279	-3.29107	Down	MGI:2685484	cell proliferation
Amigo1	ENSMUSG00000050947	9.84677	7.72325	8.78501	0.241721	0.496	0.119894	1.27495	Up	MGI:2653612	cell differentiation
Ammecr1	ENSMUSG00000042225	15.1298	21.2076	18.1687	0.33452	0.675	0.225801	-1.40171	Down	MGI:1860206
Ammecr1l	ENSMUSG00000041915	21.9129	25.0834	23.4982	0.134926	0.75	0.101194	-1.14469	Down	MGI:2442711
Amn	ENSMUSG00000021278	1.42398	1.31646	1.37022	0.0784692	0.267	0.0209513	1.08167	Up	MGI:1934943
Amn1	ENSMUSG00000068250	4.77777	9.72284	7.25031	0.68205	0.462	0.315107	-2.03502	Down	MGI:2442933
Amot	ENSMUSG00000041688	11.039	9.52335	10.2812	0.14742	0.533	0.0785748	1.15915	Up	MGI:108440	cell differentiation
Amotl1	ENSMUSG00000013076	4.67999	3.83824	4.25911	0.197635	0.383	0.0756942	1.21931	Up	MGI:1922973
Amotl2	ENSMUSG00000032531	32.4449	26.4546	29.4497	0.203407	0.815	0.165777	1.22644	Up	MGI:1929286
Ampd1	ENSMUSG00000070385	0.0911638	0.0919583	0.0915611	0.00867727	0.041	0.000355768	-1.00872	Down	MGI:88015
Ampd2	ENSMUSG00000027889	51.1279	41.4595	46.2937	0.208849	0.926	0.193394	1.2332	Up	MGI:88016	cell differentiation
Ampd3	ENSMUSG00000005686	1.50983	0.95617	1.233	0.449035	0.257	0.115402	1.57904	Up	MGI:1096344
Amph	ENSMUSG00000021314	0.715853	0.650372	0.683113	0.0958568	0.207	0.0198424	1.10068	Up	MGI:103574
Amt	ENSMUSG00000032607	4.59742	4.96101	4.77921	0.0760773	0.397	0.0302027	-1.07909	Down	MGI:3646700
Amz1	ENSMUSG00000050022	0.701628	0.518053	0.609841	0.301021	0.197	0.0593012	1.35436	Up	MGI:2442258
Amz2	ENSMUSG00000020610	19.9609	19.6187	19.7898	0.0172917	0.702	0.0121388	1.01744	Up	MGI:104837
Anapc1	ENSMUSG00000014355	58.0079	62.2698	60.1388	0.0708677	0.964	0.0683164	-1.07347	Down	MGI:103097
Anapc10	ENSMUSG00000036977	9.24782	16.1556	12.7017	0.543846	0.583	0.317062	-1.74696	Down	MGI:1916249
Anapc11	ENSMUSG00000025135	12.2118	13.0865	12.6491	0.0691509	0.581	0.0401767	-1.07163	Down	MGI:1913406
Anapc13	ENSMUSG00000035048	15.3643	19.3687	17.3665	0.230582	0.664	0.153106	-1.26063	Down	MGI:1916260
Anapc16	ENSMUSG00000020107	2.5979	3.32783	2.96286	0.24636	0.341	0.0840086	-1.28097	Down	MGI:1289325
Anapc2	ENSMUSG00000026965	62.1689	59.2164	60.6927	0.0486467	0.965	0.0469441	1.04986	Up	MGI:2139135	cell differentiation
Anapc5	ENSMUSG00000029472	43.709	50.1917	46.9504	0.138076	0.93	0.12841	-1.14831	Down	MGI:1929722
Anapc7	ENSMUSG00000029466	48.13	39.4284	43.7792	0.198761	0.915	0.181866	1.22069	Up	MGI:1929711
Ang4	ENSMUSG00000060615	0	0.154355	0.0771775	2	0.028	0.056	0	Down	MGI:2656551	cell proliferation
Angel1	ENSMUSG00000021257	24.7045	23.643	24.1737	0.0439113	0.759	0.0333287	1.0449	Up	MGI:1915987
Angel2	ENSMUSG00000026634	27.2905	32.9747	30.1326	0.18864	0.822	0.155062	-1.20828	Down	MGI:1196310
Angpt1	ENSMUSG00000022309	0.060425	0.0831892	0.0718071	0.317019	0.022	0.00697441	-1.37673	Down	MGI:108448	cell proliferation;cell differentiation
Angpt4	ENSMUSG00000027460	0.139822	0	0.069911	2	0.02	0.04	0	Up	MGI:1336887
Angptl1	ENSMUSG00000033544	0.878322	0.402074	0.640198	0.743907	0.202	0.150269	2.18448	Up	MGI:1919963
Angptl2	ENSMUSG00000004105	4.66431	1.52274	3.09353	1.01553	0.346	0.351374	3.0631	Up	MGI:1347002
Angptl4	ENSMUSG00000002289	9.01082	5.20807	7.10945	0.534887	0.458	0.244978	1.73016	Up	MGI:1888999
Angptl6	ENSMUSG00000038742	10.8497	8.67336	9.76153	0.222951	0.52	0.115934	1.25092	Up	MGI:1917976	cell differentiation
Angptl7	ENSMUSG00000028989	0.353064	0.224649	0.288856	0.444563	0.137	0.0609052	1.57163	Up	MGI:3605801
Ank	ENSMUSG00000022265	5.90538	7.77054	6.83796	0.272766	0.451	0.123017	-1.31584	Down	MGI:3045421		abnormal male fertility
Ank1	ENSMUSG00000031543	0.917655	0.558675	0.738165	0.486314	0.214	0.104071	1.64256	Up	MGI:88024	cell differentiation
Ank2	ENSMUSG00000032826	1.85716	1.52338	1.69027	0.197471	0.284	0.0560819	1.2191	Up	MGI:88025	cell differentiation
Ank3	ENSMUSG00000069601	2.80522	3.53577	3.17049	0.230421	0.348	0.0801867	-1.26043	Down	MGI:88026	cell differentiation
Ankdd1b	ENSMUSG00000047117	2.10345	1.50862	1.80604	0.329357	0.291	0.0958428	1.39429	Up	MGI:2444730
Ankfy1	ENSMUSG00000020790	18.7298	20.2438	19.4868	0.0776936	0.697	0.0541525	-1.08083	Down	MGI:1337008
Ankib1	ENSMUSG00000040351	18.388	23.0348	20.7114	0.22436	0.714	0.160193	-1.25271	Down	MGI:1918047
Ankle1	ENSMUSG00000046295	3.35868	3.78122	3.56995	0.11836	0.361	0.042728	-1.12581	Down	MGI:1918775	cell differentiation
Ankle2	ENSMUSG00000029501	27.2111	32.2968	29.7539	0.170925	0.818	0.139817	-1.1869	Down	MGI:1261856
Ankmy1	ENSMUSG00000034212	2.54915	2.0669	2.30802	0.208945	0.315	0.0658176	1.23332	Up	MGI:3045261
Ankmy2	ENSMUSG00000036188	9.60907	9.54165	9.57536	0.00704099	0.516	0.00363315	1.00707	Up	MGI:2144755
Ankra2	ENSMUSG00000021661	12.2331	16.4877	14.3604	0.296273	0.615	0.182208	-1.34779	Down	MGI:1915808
Ankrd10	ENSMUSG00000031508	32.7207	36.4091	34.5649	0.106709	0.86	0.0917701	-1.11272	Down	MGI:1921840
Ankrd11	ENSMUSG00000035569	44.71	37.8022	41.2561	0.167437	0.902	0.151028	1.18274	Up	MGI:1924337
Ankrd13a	ENSMUSG00000041870	73.3009	79.3046	76.3028	0.0786826	0.984	0.0774237	-1.0819	Down	MGI:1915670
Ankrd13c	ENSMUSG00000039988	12.1369	14.1847	13.1608	0.155598	0.591	0.0919587	-1.16873	Down	MGI:2139746
Ankrd13d	ENSMUSG00000005986	6.67714	5.36532	6.02123	0.217866	0.429	0.0934644	1.2445	Up	MGI:1915673
Ankrd16	ENSMUSG00000047909	8.30255	10.3783	9.34042	0.222233	0.51	0.113339	-1.25001	Down	MGI:2444796
Ankrd17	ENSMUSG00000055204	34.3738	30.9289	32.6513	0.105503	0.844	0.089045	1.11138	Up	MGI:1932101	cell differentiation
Ankrd2	ENSMUSG00000025172	0.492728	0.0757012	0.284215	1.4673	0.136	0.199552	6.50885	Up	MGI:1861447	cell proliferation;cell differentiation
Ankrd24	ENSMUSG00000054708	5.03139	3.73992	4.38565	0.294476	0.386	0.113668	1.34532	Up	MGI:1890394
Ankrd26	ENSMUSG00000007827	10.5589	11.6145	11.0867	0.0952132	0.549	0.052272	-1.09997	Down	MGI:1917887	cell differentiation
Ankrd27	ENSMUSG00000034867	21.8861	17.1506	19.5183	0.242618	0.697	0.169105	1.27611	Up	MGI:2444103	cell differentiation
Ankrd28	ENSMUSG00000014496	17.6239	23.8124	20.7182	0.298699	0.714	0.213271	-1.35114	Down	MGI:2145661
Ankrd34a	ENSMUSG00000049097	0.733128	0.291708	0.512418	0.861445	0.183	0.157644	2.51323	Up	MGI:3617846
Ankrd34b	ENSMUSG00000045034	2.89244	2.34435	2.6184	0.209323	0.328	0.0686579	1.23379	Up	MGI:2443245
Ankrd35	ENSMUSG00000038354	0.207914	0.373028	0.290471	0.568435	0.138	0.0784441	-1.79415	Down	MGI:2442590
Ankrd37	ENSMUSG00000050914	2.92825	4.1373	3.53277	0.342238	0.359	0.122863	-1.41289	Down	MGI:3603344
Ankrd39	ENSMUSG00000079610	0.581748	0.59295	0.587349	0.0190721	0.195	0.00371907	-1.01926	Down	MGI:1914816
Ankrd40	ENSMUSG00000020864	27.1553	27.7069	27.4311	0.0201086	0.795	0.0159863	-1.02031	Down	MGI:1918702
Ankrd44	ENSMUSG00000052331	6.94504	5.60092	6.27298	0.214271	0.436	0.0934223	1.23998	Up	MGI:3045243
Ankrd45	ENSMUSG00000044835	5.19687	4.10924	4.65306	0.233745	0.393	0.0918619	1.26468	Up	MGI:1921094
Ankrd46	ENSMUSG00000048307	23.9822	28.6069	26.2946	0.175881	0.783	0.137714	-1.19284	Down	MGI:1916089
Ankrd49	ENSMUSG00000031931	20.3805	8.48311	14.4318	0.824387	0.616	0.507822	2.40248	Up	MGI:1930842	cell differentiation
Ankrd50	ENSMUSG00000044864	7.51595	6.77297	7.14446	0.103994	0.458	0.0476291	1.1097	Up	MGI:2139777
Ankrd54	ENSMUSG00000033055	27.3842	26.666	27.0251	0.0265753	0.791	0.0210211	1.02693	Up	MGI:2444209	cell differentiation
Ankrd55	ENSMUSG00000049985	0.0658572	0.135964	0.100911	0.694742	0.049	0.0340423	-2.06453	Down	MGI:1924568
Ankrd6	ENSMUSG00000040183	6.67275	5.3052	5.98897	0.228345	0.428	0.0977315	1.25778	Up	MGI:2154278
Ankrd61	ENSMUSG00000029607	0.835456	0.810163	0.822809	0.0307398	0.223	0.00685498	1.03122	Up	MGI:1913979
Ankrd9	ENSMUSG00000037904	2.5255	2.1355	2.3305	0.167346	0.316	0.0528814	1.18263	Up	MGI:1921501
Anks1	ENSMUSG00000024219	16.0946	13.7173	14.906	0.159487	0.625	0.0996792	1.17331	Up	MGI:2446180	cell differentiation
Anks1b	ENSMUSG00000058589	1.36804	0.722056	1.04505	0.618138	0.244	0.150826	1.89465	Up	MGI:1924781
Anks3	ENSMUSG00000022515	7.22487	8.40889	7.81688	0.151469	0.475	0.0719478	-1.16388	Down	MGI:1919865
Anks6	ENSMUSG00000066191	7.81239	5.61658	6.71448	0.327026	0.447	0.146181	1.39095	Up	MGI:1922941
Anln	ENSMUSG00000036777	25.673	28.6319	27.1525	0.108974	0.793	0.0864161	-1.11525	Down	MGI:1920174	cell differentiation
Ano1	ENSMUSG00000031075	6.41735	6.50696	6.46216	0.0138669	0.44	0.00610143	-1.01396	Down	MGI:2142149
Ano10	ENSMUSG00000037949	28.0698	27.2031	27.6364	0.0313608	0.797	0.0249945	1.03186	Up	MGI:2143103
Ano2	ENSMUSG00000038115	0.0509648	0.0643035	0.0576341	0.231437	0.007	0.00162006	-1.26172	Down	MGI:2387214
Ano3	ENSMUSG00000074968	0.171606	0.141136	0.156371	0.194857	0.086	0.0167577	1.21589	Up	MGI:3613666
Ano4	ENSMUSG00000035189	1.5293	2.12996	1.82963	0.328296	0.293	0.0961907	-1.39277	Down	MGI:2443344
Ano5	ENSMUSG00000055489	0.0272912	0.114558	0.0709246	1.23042	0.021	0.0258387	-4.19762	Down	MGI:3576659
Ano6	ENSMUSG00000064210	13.4005	10.2304	11.8154	0.268301	0.566	0.151859	1.30987	Up	MGI:2145890
Ano7	ENSMUSG00000034107	0.0392242	0.0837034	0.0614638	0.723665	0.01	0.00723665	-2.13397	Down	MGI:3052714
Ano8	ENSMUSG00000034863	2.82404	1.46421	2.14412	0.634212	0.308	0.195337	1.92871	Up	MGI:2687327
Ano9	ENSMUSG00000054662	0.151935	0.258916	0.205425	0.520781	0.109	0.0567651	-1.70413	Down	MGI:1918595
Anp32a	ENSMUSG00000032249	29.8147	30.2791	30.0469	0.0154558	0.821	0.0126892	-1.01558	Down	MGI:108447
Anp32b	ENSMUSG00000028333	72.2193	89.2502	80.7348	0.210949	0.987	0.208206	-1.23582	Down	MGI:1914878	cell proliferation
Anp32e	ENSMUSG00000015749	31.6333	39.0558	35.3445	0.210004	0.867	0.182074	-1.23464	Down	MGI:1913721
Anpep	ENSMUSG00000039062	11.7747	8.17375	9.97423	0.361026	0.526	0.189899	1.44055	Up	MGI:5000466	cell differentiation
Antxr1	ENSMUSG00000033420	19.9243	14.8837	17.404	0.289623	0.665	0.192599	1.33867	Up	MGI:1916788	cell differentiation
Antxr2	ENSMUSG00000029338	5.60984	3.20583	4.40784	0.545395	0.387	0.211068	1.74989	Up	MGI:1919164
Anxa1	ENSMUSG00000024659	5.65803	4.92989	5.29396	0.137542	0.41	0.0563921	1.1477	Up	MGI:96819	cell proliferation;cell differentiation
Anxa11	ENSMUSG00000021866	16.3215	16.9491	16.6353	0.0377326	0.653	0.0246394	-1.03846	Down	MGI:108481
Anxa13	ENSMUSG00000055114	0.075607	0.165891	0.120749	0.7477	0.064	0.0478528	-2.19412	Down	MGI:1917037
Anxa2	ENSMUSG00000032231	65.8741	80.1754	73.0247	0.195842	0.981	0.192121	-1.2171	Down	MGI:88246	cell proliferation;cell differentiation
Anxa3	ENSMUSG00000029484	9.4142	9.39391	9.40405	0.00215758	0.512	0.00110468	1.00216	Up	MGI:1201378
Anxa4	ENSMUSG00000029994	32.9475	32.2337	32.5906	0.021902	0.844	0.0184853	1.02214	Up	MGI:88030
Anxa5	ENSMUSG00000027712	39.0696	31.8924	35.481	0.202283	0.869	0.175784	1.22504	Up	MGI:106008
Anxa6	ENSMUSG00000018340	42.8725	35.203	39.0378	0.196464	0.89	0.174853	1.21786	Up	MGI:88255
Anxa7	ENSMUSG00000021814	28.4346	23.7331	26.0838	0.180246	0.781	0.140772	1.1981	Up	MGI:88031	cell proliferation
Aoc2	ENSMUSG00000078651	4.29586	4.185	4.24043	0.0261436	0.382	0.00998685	1.02649	Up	MGI:2668431
Aoc3	ENSMUSG00000019326	5.16916	2.57605	3.87261	0.669604	0.371	0.248423	2.00662	Up	MGI:1306797
Aox1	ENSMUSG00000063558	0.732479	0.80191	0.767194	0.0904999	0.217	0.0196385	-1.09479	Down	MGI:88035
Aox3	ENSMUSG00000064294	0.0949996	0.096868	0.0959338	0.0194759	0.044	0.000856941	-1.01967	Down	MGI:1918974
Aox4	ENSMUSG00000038242	0.738965	0.53173	0.635347	0.326176	0.201	0.0655613	1.38974	Up	MGI:1919122
Ap1ar	ENSMUSG00000074238	33.0056	32.3374	32.6715	0.0204521	0.844	0.0172616	1.02066	Up	MGI:2384822	cell differentiation
Ap1b1	ENSMUSG00000009090	48.3835	46.8813	47.6324	0.0315374	0.932	0.0293928	1.03204	Up	MGI:1096368
Ap1g1	ENSMUSG00000031731	27.2519	30.6618	28.9568	0.117756	0.81	0.0953826	-1.12512	Down	MGI:101919	cell differentiation	abnormal male fertility
Ap1m2	ENSMUSG00000003309	10.4944	8.08576	9.29008	0.25927	0.509	0.131968	1.29789	Up	MGI:1336974
Ap1s1	ENSMUSG00000004849	66.1012	65.5761	65.8387	0.00797556	0.972	0.00775224	1.00801	Up	MGI:1098244
Ap1s2	ENSMUSG00000031367	6.75615	14.9154	10.8358	0.752992	0.544	0.409628	-2.20768	Down	MGI:1889383	cell differentiation
Ap1s3	ENSMUSG00000054702	1.78628	3.53495	2.66061	0.657243	0.33	0.21689	-1.97895	Down	MGI:1891304
Ap2a1	ENSMUSG00000060279	69.8773	60.2529	65.0651	0.14792	0.971	0.14363	1.15973	Up	MGI:101921	cell differentiation
Ap2a2	ENSMUSG00000002957	50.3092	42.9006	46.6049	0.158966	0.928	0.147521	1.17269	Up	MGI:101920	cell differentiation
Ap2m1	ENSMUSG00000022841	25.9112	26.3601	26.1356	0.0171758	0.781	0.0134143	-1.01732	Down	MGI:1298405
Ap2s1	ENSMUSG00000008036	55.6585	52.5737	54.1161	0.0570034	0.951	0.0542102	1.05868	Up	MGI:2141861
Ap3b1	ENSMUSG00000021686	35.3764	35.3907	35.3835	0.000404143	0.867	0.000350392	-1.0004	Down	MGI:1333879	cell differentiation
Ap3b2	ENSMUSG00000062444	0.692114	0.506481	0.599298	0.309751	0.196	0.0607112	1.36652	Up	MGI:1100869
Ap3d1	ENSMUSG00000020198	37.8306	40.285	39.0578	0.0628402	0.89	0.0559278	-1.06488	Down	MGI:107734	cell differentiation	abnormal male fertility
Ap3m1	ENSMUSG00000021824	6.53125	7.67806	7.10466	0.161417	0.458	0.0739289	-1.17559	Down	MGI:1929212
Ap3m2	ENSMUSG00000031539	8.61891	7.61283	8.11587	0.123965	0.481	0.0596269	1.13216	Up	MGI:1929214
Ap3s1	ENSMUSG00000024480	14.149	32.84	23.4945	0.795548	0.75	0.596661	-2.32101	Down	MGI:1337062
Ap3s2	ENSMUSG00000063801	13.5258	13.7303	13.628	0.0150058	0.601	0.00901849	-1.01512	Down	MGI:1337060
Ap4b1	ENSMUSG00000032952	8.97699	10.6894	9.83319	0.174146	0.522	0.0909041	-1.19076	Down	MGI:1337130
Ap4e1	ENSMUSG00000001998	9.52494	12.2249	10.8749	0.248274	0.545	0.135309	-1.28346	Down	MGI:1336993
Ap4m1	ENSMUSG00000019518	8.35832	8.30863	8.33347	0.0059627	0.486	0.00289787	1.00598	Up	MGI:1337063
Ap4s1	ENSMUSG00000020955	9.29873	8.58399	8.94136	0.0799364	0.5	0.0399682	1.08326	Up	MGI:1337065
Apaf1	ENSMUSG00000019979	8.55476	9.30282	8.92879	0.0837807	0.499	0.0418066	-1.08744	Down	MGI:1306796		abnormal male fertility
Apba1	ENSMUSG00000024897	7.68253	5.82916	6.75584	0.274336	0.449	0.123177	1.31795	Up	MGI:1860297
Apba2	ENSMUSG00000030519	8.53629	5.93538	7.23583	0.359448	0.461	0.165706	1.4382	Up	MGI:1261791
Apbb1	ENSMUSG00000037032	33.6605	30.1069	31.8837	0.111455	0.838	0.0933993	1.11803	Up	MGI:107765	cell differentiation
Apbb1ip	ENSMUSG00000026786	1.36229	1.09226	1.22728	0.220024	0.256	0.0563262	1.24722	Up	MGI:1861354
Apbb2	ENSMUSG00000029207	8.13336	6.99366	7.56351	0.150684	0.469	0.0706708	1.16296	Up	MGI:108405	cell differentiation
Apc	ENSMUSG00000005871	22.8622	24.9131	23.8877	0.0858561	0.755	0.0648213	-1.08971	Down	MGI:88039	cell proliferation;cell differentiation
Apcdd1	ENSMUSG00000071847	8.12939	5.97586	7.05263	0.305352	0.456	0.13924	1.36037	Up	MGI:3513977	cell differentiation
Apeh	ENSMUSG00000032590	27.6617	30.8312	29.2464	0.108372	0.813	0.0881065	-1.11458	Down	MGI:88041
Apex1	ENSMUSG00000035960	39.5434	39.7203	39.6319	0.00446358	0.894	0.00399044	-1.00447	Down	MGI:88042
Aph1a	ENSMUSG00000015750	7.76684	14.7619	11.2644	0.62099	0.554	0.344028	-1.90063	Down	MGI:2385110
Api5	ENSMUSG00000027193	30.0351	45.2469	37.641	0.404128	0.881	0.356037	-1.50647	Down	MGI:1888993
Apip	ENSMUSG00000010911	17.5163	30.2993	23.9078	0.534679	0.755	0.403683	-1.72978	Down	MGI:1926788
Apitd1	ENSMUSG00000073705	21.5711	22.0392	21.8052	0.0214674	0.729	0.0156497	-1.0217	Down	MGI:1917178
Aplf	ENSMUSG00000030051	8.00029	8.53139	8.26584	0.0642524	0.484	0.0310982	-1.06639	Down	MGI:1919353
Apln	ENSMUSG00000037010	6.12198	6.4781	6.30004	0.0565266	0.437	0.0247021	-1.05817	Down	MGI:1353624	cell proliferation
Aplnr	ENSMUSG00000044338	0.71235	0.823633	0.767991	0.144901	0.217	0.0314436	-1.15622	Down	MGI:1346086	cell proliferation;cell differentiation
Aplp1	ENSMUSG00000006651	16.5608	8.64488	12.6028	0.628106	0.58	0.364302	1.91568	Up	MGI:88046
Aplp2	ENSMUSG00000031996	69.7052	81.1898	75.4475	0.15222	0.983	0.149632	-1.16476	Down	MGI:88047
Apoa1	ENSMUSG00000032083	0.847785	0.522769	0.685277	0.474284	0.207	0.0981768	1.62172	Up	MGI:88049	cell proliferation;cell differentiation
Apoa1bp	ENSMUSG00000028070	103.662	96.3839	100.023	0.0727643	0.994	0.0723277	1.07551	Up	MGI:2180167
Apoa2	ENSMUSG00000005681	0.717987	0.989163	0.853575	0.317694	0.226	0.0717989	-1.37769	Down	MGI:88050
Apoa4	ENSMUSG00000032080	0.0915567	0.0448247	0.0681907	0.685313	0.018	0.0123356	2.04255	Up	MGI:88051	cell differentiation
Apobec1	ENSMUSG00000040613	1.43117	2.87771	2.15444	0.671423	0.309	0.20747	-2.01074	Down	MGI:103298	cell proliferation
Apobec2	ENSMUSG00000040694	0.455068	0.226377	0.340722	0.671194	0.151	0.10135	2.01022	Up	MGI:1343178
Apobec3	ENSMUSG00000009585	9.84446	13.7993	11.8219	0.334536	0.566	0.189347	-1.40173	Down	MGI:1933111	cell differentiation
Apobr	ENSMUSG00000042759	0.196997	0.214472	0.205734	0.0849396	0.109	0.00925841	-1.08871	Down	MGI:2176230
Apoc1	ENSMUSG00000040564	4.89164	3.49627	4.19395	0.33271	0.381	0.126762	1.3991	Up	MGI:88053
Apoc2	ENSMUSG00000002992	19.9192	11.4245	15.6718	0.542036	0.639	0.346361	1.74355	Up	MGI:88054
Apod	ENSMUSG00000022548	0.0933984	0.057013	0.0752057	0.483812	0.026	0.0125791	1.63819	Up	MGI:88056	cell proliferation
Apof	ENSMUSG00000047631	0.380297	0.224356	0.302326	0.515803	0.141	0.0727283	1.69506	Up	MGI:104539
Apol6	ENSMUSG00000033576	0.113107	0.0395589	0.0763329	0.963517	0.027	0.026015	2.8592	Up	MGI:1919189
Apol7b	ENSMUSG00000068252	0.11689	0.145609	0.131249	0.218812	0.07	0.0153169	-1.24569	Down	MGI:3583950
Apol7c	ENSMUSG00000044309	0.0450027	0.0674342	0.0562185	0.399006	0.006	0.00239404	-1.49845	Down	MGI:1920912
Apold1	ENSMUSG00000090698	0.0875852	0.0877762	0.0876807	0.00217836	0.037	8.05993e-05	-1.00218	Down	MGI:2685921
Apom	ENSMUSG00000024391	0.65607	0.0840686	0.370069	1.54566	0.158	0.244214	7.80398	Up	MGI:1930124
Apon	ENSMUSG00000051716	0.0693669	0.0766926	0.0730298	0.100311	0.023	0.00230716	-1.10561	Down	MGI:88931
Apoo	ENSMUSG00000079508	2.86823	3.72711	3.29767	0.260451	0.353	0.091939	-1.29945	Down	MGI:1915566
Apool	ENSMUSG00000025525	14.0159	16.7978	15.4068	0.180563	0.634	0.114477	-1.19848	Down	MGI:1915367
App	ENSMUSG00000022892	102.575	112.745	107.66	0.0944641	0.996	0.0940862	-1.09915	Down	MGI:88059	cell proliferation;cell differentiation
Appbp2	ENSMUSG00000018481	32.7485	44.9053	38.8269	0.313103	0.889	0.278348	-1.37122	Down	MGI:1914134
Appl1	ENSMUSG00000040760	32.9745	40.2704	36.6225	0.199219	0.875	0.174317	-1.22126	Down	MGI:1920243	cell proliferation
Appl2	ENSMUSG00000020263	34.6645	39.5456	37.105	0.131548	0.878	0.115499	-1.14081	Down	MGI:2384914	cell proliferation
Aprt	ENSMUSG00000006589	65.9957	46.4001	56.1979	0.348689	0.956	0.333347	1.42232	Up	MGI:88061
Aptx	ENSMUSG00000028411	11.3676	12.5719	11.9697	0.100612	0.569	0.0572482	-1.10594	Down	MGI:1913658
Aqp11	ENSMUSG00000042797	2.77241	2.72959	2.751	0.0155652	0.333	0.00518323	1.01569	Up	MGI:1913583
Aqp12	ENSMUSG00000045091	3.63698	1.35333	2.49516	0.915234	0.324	0.296536	2.68743	Up	MGI:2664636
Aqp2	ENSMUSG00000023013	0.946103	0.337839	0.641971	0.947495	0.202	0.191394	2.80046	Up	MGI:1096865
Aqp3	ENSMUSG00000028435	0.0618935	0.0558468	0.0588701	0.102712	0.008	0.0008217	1.10827	Up	MGI:1333777
Aqp5	ENSMUSG00000044217	9.05753	6.82829	7.94291	0.280658	0.477	0.133874	1.32647	Up	MGI:106215
Aqp6	ENSMUSG00000043144	0.577681	0.253442	0.415562	0.780243	0.167	0.130301	2.27934	Up	MGI:1341204
Aqp7	ENSMUSG00000028427	0.143853	0.155055	0.149454	0.0749528	0.082	0.00614613	-1.07787	Down	MGI:1314647
Aqp8	ENSMUSG00000030762	0.0752557	0.327787	0.201521	1.25312	0.107	0.134084	-4.35564	Down	MGI:1195271		abnormal spermatogenesis
Aqp9	ENSMUSG00000032204	0.0962788	0.154472	0.125375	0.464152	0.066	0.030634	-1.60442	Down	MGI:1891066
Aqr	ENSMUSG00000040383	39.0634	37.2936	38.1785	0.0463559	0.885	0.041025	1.04746	Up	MGI:1276102
Ar	ENSMUSG00000046532	4.1779	8.24055	6.20922	0.654293	0.434	0.283963	-1.97241	Down	MGI:88064	cell proliferation;cell differentiation	abnormal male fertility;abnormal spermatogenesis
Arap2	ENSMUSG00000037999	2.69817	5.70162	4.1999	0.715126	0.381	0.272463	-2.11315	Down	MGI:2684416
Arap3	ENSMUSG00000024451	2.02143	1.61326	1.81734	0.224597	0.292	0.0655823	1.25301	Up	MGI:2147274
Arc	ENSMUSG00000022602	7.5057	6.09427	6.79998	0.207564	0.45	0.0934037	1.2316	Up	MGI:88067	cell differentiation
Arcn1	ENSMUSG00000032096	36.1421	50.5648	43.3534	0.332677	0.912	0.303402	-1.39906	Down	MGI:2387591
Areg	ENSMUSG00000029378	0.0778633	0.170632	0.124248	0.746643	0.066	0.0492785	-2.19143	Down	MGI:88068	cell proliferation;cell differentiation
Arf1	ENSMUSG00000048076	76.88	79.3404	78.1102	0.0314991	0.986	0.0310581	-1.032	Down	MGI:99431
Arf2	ENSMUSG00000062421	16.9676	27.6103	22.2889	0.477488	0.736	0.351431	-1.62724	Down	MGI:99595
Arf3	ENSMUSG00000051853	59.6461	73.6856	66.6658	0.210595	0.974	0.20512	-1.23538	Down	MGI:99432
Arf4	ENSMUSG00000021877	29.5103	47.5103	38.5103	0.467407	0.887	0.41459	-1.60996	Down	MGI:99433
Arf5	ENSMUSG00000020440	78.8206	41.2647	60.0426	0.625487	0.964	0.60297	1.91012	Up	MGI:99434
Arf6	ENSMUSG00000044147	9.6402	10.9083	10.2743	0.123426	0.533	0.0657863	-1.13154	Down	MGI:99435	cell differentiation
Arfgef1	ENSMUSG00000067851	25.6147	30.7248	28.1698	0.181404	0.804	0.145849	-1.1995	Down	MGI:2442988	cell differentiation
Arfip1	ENSMUSG00000074513	12.061	19.8888	15.9749	0.490006	0.643	0.315074	-1.64902	Down	MGI:1277120
Arfip2	ENSMUSG00000030881	15.9349	17.5014	16.7182	0.0937006	0.654	0.0612802	-1.09831	Down	MGI:1924182
Arfrp1	ENSMUSG00000038671	12.1508	18.5069	15.3289	0.41465	0.633	0.262473	-1.5231	Down	MGI:1923938
Arg1	ENSMUSG00000019987	0.47508	0.228101	0.351591	0.702462	0.153	0.107477	2.08276	Up	MGI:88070	cell proliferation
Arglu1	ENSMUSG00000040459	54.8584	70.7137	62.7861	0.252529	0.968	0.244448	-1.28902	Down	MGI:2442985
Arhgap1	ENSMUSG00000027247	39.7189	37.9548	38.8368	0.0454234	0.889	0.0403814	1.04648	Up	MGI:2445003
Arhgap10	ENSMUSG00000037148	22.1747	18.8656	20.5202	0.161261	0.712	0.114818	1.1754	Up	MGI:1925764
Arhgap11a	ENSMUSG00000041219	14.0511	14.055	14.053	0.00027752	0.609	0.00016901	-1.00028	Down	MGI:2444300
Arhgap12	ENSMUSG00000041225	15.3699	19.7873	17.5786	0.251294	0.667	0.167613	-1.28741	Down	MGI:1922665
Arhgap17	ENSMUSG00000030766	12.5407	12.5887	12.5647	0.00382023	0.58	0.00221573	-1.00383	Down	MGI:1917747
Arhgap18	ENSMUSG00000039031	12.1228	12.0873	12.1051	0.00293266	0.572	0.00167748	1.00294	Up	MGI:1921160
Arhgap19	ENSMUSG00000025154	18.6326	23.3834	21.008	0.226142	0.719	0.162596	-1.25497	Down	MGI:1918335
Arhgap20	ENSMUSG00000053199	3.99999	5.78055	4.89027	0.364103	0.4	0.145641	-1.44514	Down	MGI:2445175
Arhgap21	ENSMUSG00000036591	23.5143	20.3857	21.95	0.142533	0.732	0.104334	1.15347	Up	MGI:1918685
Arhgap22	ENSMUSG00000063506	5.2362	6.00996	5.62308	0.137604	0.419	0.0576562	-1.14777	Down	MGI:2443418	cell differentiation
Arhgap24	ENSMUSG00000057315	0.363694	0.229789	0.296741	0.451251	0.14	0.0631752	1.58273	Up	MGI:1922647	cell differentiation
Arhgap25	ENSMUSG00000030047	0.831825	0.439697	0.635761	0.616785	0.201	0.123974	1.89181	Up	MGI:2443687
Arhgap26	ENSMUSG00000036452	21.3594	18.9259	20.1426	0.120813	0.706	0.0852942	1.12858	Up	MGI:1918552
Arhgap27	ENSMUSG00000034255	1.4171	1.71342	1.56526	0.18931	0.278	0.0526283	-1.2091	Down	MGI:1916903
Arhgap28	ENSMUSG00000024043	2.68141	1.62878	2.1551	0.488438	0.309	0.150927	1.64627	Up	MGI:2147003
Arhgap29	ENSMUSG00000039831	21.5704	29.7616	25.666	0.319146	0.776	0.247657	-1.37974	Down	MGI:2443818
Arhgap31	ENSMUSG00000022799	5.87396	8.62873	7.25134	0.379898	0.462	0.175513	-1.46898	Down	MGI:1333857
Arhgap32	ENSMUSG00000041444	22.7654	20.7898	21.7776	0.0907171	0.729	0.0661327	1.09503	Up	MGI:2450166
Arhgap33	ENSMUSG00000036882	12.5657	9.96645	11.2661	0.230715	0.554	0.127816	1.2608	Up	MGI:2673998
Arhgap36	ENSMUSG00000036198	0.348445	0.218043	0.283244	0.460388	0.135	0.0621523	1.59806	Up	MGI:1922654
Arhgap39	ENSMUSG00000033697	18.7523	16.8097	17.781	0.109251	0.67	0.0731985	1.11556	Up	MGI:107858
Arhgap4	ENSMUSG00000031389	2.911	1.80616	2.35858	0.468434	0.318	0.148962	1.61171	Up	MGI:2159577	cell differentiation
Arhgap40	ENSMUSG00000074625	0.203678	0.219436	0.211557	0.0744858	0.111	0.00826793	-1.07737	Down	MGI:3649852
Arhgap42	ENSMUSG00000050730	2.54999	2.34916	2.44958	0.0819857	0.322	0.0263994	1.08549	Up	MGI:1918794
Arhgap44	ENSMUSG00000033389	13.7501	14.1105	13.9303	0.0258717	0.607	0.0157041	-1.02621	Down	MGI:2144423	cell differentiation
Arhgap5	ENSMUSG00000035133	17.1675	29.7961	23.4818	0.537804	0.75	0.403353	-1.73561	Down	MGI:1332637	cell proliferation
Arhgap6	ENSMUSG00000031355	0.157552	0.0224023	0.0899772	1.50204	0.039	0.0585797	7.03285	Up	MGI:1196332
Arhgap8	ENSMUSG00000078954	2.02379	0.769847	1.39682	0.897714	0.268	0.240587	2.62882	Up	MGI:1920417
Arhgap9	ENSMUSG00000040345	0.739879	0.372362	0.556121	0.660859	0.19	0.125563	1.98699	Up	MGI:2143764
Arhgdia	ENSMUSG00000025132	40.9055	36.3064	38.6059	0.119129	0.888	0.105787	1.12667	Up	MGI:2178103		abnormal male fertility
Arhgdib	ENSMUSG00000030220	2.22747	1.10345	1.66546	0.674901	0.283	0.190997	2.01864	Up	MGI:101940		abnormal spermatogenesis
Arhgdig	ENSMUSG00000073433	25.7385	19.4988	22.6186	0.275865	0.739	0.203864	1.32	Up	MGI:108430
Arhgef1	ENSMUSG00000040940	37.5724	26.7457	32.1591	0.336661	0.84	0.282795	1.4048	Up	MGI:1353510
Arhgef10	ENSMUSG00000071176	10.8397	12.2209	11.5303	0.119789	0.559	0.0669619	-1.12742	Down	MGI:2444453	cell differentiation
Arhgef10l	ENSMUSG00000040964	6.68005	5.71432	6.19718	0.155834	0.434	0.0676318	1.169	Up	MGI:1920004
Arhgef15	ENSMUSG00000052921	12.3203	7.82931	10.0748	0.445764	0.528	0.235364	1.57361	Up	MGI:3045246		abnormal male fertility
Arhgef16	ENSMUSG00000029032	5.93776	5.6898	5.81378	0.0426504	0.424	0.0180838	1.04358	Up	MGI:2446219
Arhgef17	ENSMUSG00000032875	32.0026	21.6079	26.8053	0.387786	0.788	0.305575	1.48106	Up	MGI:2673002
Arhgef18	ENSMUSG00000004568	28.4078	25.3069	26.8574	0.115458	0.789	0.0910965	1.12253	Up	MGI:2142567
Arhgef19	ENSMUSG00000028919	1.84836	0.491943	1.17015	1.15918	0.254	0.294432	3.75726	Up	MGI:1925912
Arhgef2	ENSMUSG00000028059	20.4684	16.6658	18.5671	0.204803	0.681	0.139471	1.22817	Up	MGI:103264	cell proliferation;cell differentiation
Arhgef25	ENSMUSG00000019467	8.98461	6.68222	7.83342	0.293919	0.475	0.139612	1.34455	Up	MGI:1277173
Arhgef26	ENSMUSG00000036885	4.11982	5.05432	4.58707	0.203725	0.392	0.0798601	-1.22683	Down	MGI:1918053	cell differentiation
Arhgef3	ENSMUSG00000021895	11.7447	10.315	11.0299	0.129623	0.548	0.0710336	1.13861	Up	MGI:1918954
Arhgef33	ENSMUSG00000054901	2.00905	1.7952	1.90212	0.112427	0.297	0.0333908	1.11912	Up	MGI:2685787
Arhgef37	ENSMUSG00000045094	0.100659	0.118244	0.109452	0.160665	0.055	0.00883656	-1.1747	Down	MGI:3045339
Arhgef4	ENSMUSG00000037509	24.4542	16.895	20.6746	0.365627	0.714	0.261058	1.44742	Up	MGI:2442507
Arhgef40	ENSMUSG00000004562	19.3036	17.5303	18.4169	0.0962863	0.679	0.0653784	1.10116	Up	MGI:2685515
Arhgef5	ENSMUSG00000033542	4.71169	2.07633	3.39401	0.776474	0.356	0.276425	2.26924	Up	MGI:1858952
Arhgef6	ENSMUSG00000031133	0.982391	0.446581	0.714486	0.749924	0.211	0.158234	2.1998	Up	MGI:1920591
Arhgef7	ENSMUSG00000031511	38.8299	34.1432	36.4866	0.12845	0.874	0.112265	1.13727	Up	MGI:1860493	cell differentiation
Arhgef9	ENSMUSG00000025656	1.24015	0.798817	1.01948	0.432899	0.242	0.104761	1.55248	Up	MGI:2442233
Arid1a	ENSMUSG00000007880	44.5928	38.2126	41.4027	0.154101	0.903	0.139153	1.16697	Up	MGI:1935147	cell differentiation
Arid1b	ENSMUSG00000069729	11.492	10.596	11.044	0.08113	0.549	0.0445404	1.08456	Up	MGI:1926129
Arid2	ENSMUSG00000033237	20.5011	20.2611	20.3811	0.0117756	0.71	0.00836069	1.01185	Up	MGI:1924294	cell proliferation
Arid3a	ENSMUSG00000019564	13.8969	10.2072	12.0521	0.306147	0.571	0.17481	1.36148	Up	MGI:1328360
Arid3b	ENSMUSG00000004661	30.2977	21.1108	25.7043	0.357408	0.777	0.277706	1.43518	Up	MGI:1930768
Arid3c	ENSMUSG00000066224	1.96825	1.08235	1.5253	0.580804	0.275	0.159721	1.8185	Up	MGI:3650624
Arid4a	ENSMUSG00000048118	6.53638	6.97386	6.75512	0.0647627	0.449	0.0290785	-1.06693	Down	MGI:2444354	cell differentiation
Arid4b	ENSMUSG00000039219	9.457	20.0884	14.7727	0.719665	0.622	0.447632	-2.12418	Down	MGI:2137512	cell differentiation	abnormal male fertility;abnormal spermatogenesis
Arid5a	ENSMUSG00000037447	10.1091	8.75272	9.43091	0.143823	0.512	0.0736373	1.15497	Up	MGI:2443039	cell differentiation
Arid5b	ENSMUSG00000019947	10.5821	13.2292	11.9057	0.22234	0.567	0.126067	-1.25015	Down	MGI:2175912	cell differentiation	abnormal male fertility
Arih1	ENSMUSG00000025234	34.6992	50.549	42.6241	0.371851	0.909	0.338012	-1.45678	Down	MGI:1344363
Arih2	ENSMUSG00000064145	14.9772	26.1846	20.5809	0.544553	0.713	0.388267	-1.7483	Down	MGI:1344361	cell proliferation;cell differentiation
Arl1	ENSMUSG00000060904	45.25	63.14	54.195	0.330104	0.952	0.314259	-1.39536	Down	MGI:99436
Arl10	ENSMUSG00000025870	19.3576	13.6545	16.5061	0.345516	0.65	0.224585	1.41767	Up	MGI:1930788
Arl11	ENSMUSG00000043157	0.0808445	0.0724188	0.0766316	0.109951	0.027	0.00296867	1.11635	Up	MGI:2444054	cell differentiation
Arl13a	ENSMUSG00000052549	0.0542759	0.0868588	0.0705674	0.461728	0.021	0.00969628	-1.60032	Down	MGI:1921698
Arl13b	ENSMUSG00000022911	4.54026	6.152	5.34613	0.301478	0.412	0.124209	-1.35499	Down	MGI:1915396	cell differentiation
Arl14	ENSMUSG00000098207	0.500767	0.526268	0.513517	0.0496595	0.184	0.00913734	-1.05092	Down	MGI:1918869
Arl15	ENSMUSG00000042348	7.19499	7.198	7.1965	0.000418259	0.46	0.000192399	-1.00042	Down	MGI:2442308
Arl16	ENSMUSG00000057594	4.07491	3.2838	3.67936	0.215013	0.364	0.0782648	1.24091	Up	MGI:1917567
Arl2bp	ENSMUSG00000031776	36.0699	35.8301	35.95	0.00667038	0.871	0.0058099	1.00669	Up	MGI:1349429
Arl3	ENSMUSG00000025035	30.723	25.1659	27.9444	0.198862	0.801	0.159289	1.22082	Up	MGI:1929699	cell differentiation
Arl4c	ENSMUSG00000049866	3.08332	3.23151	3.15742	0.046934	0.347	0.0162861	-1.04806	Down	MGI:2445172
Arl4d	ENSMUSG00000034936	10.084	14.7617	12.4229	0.37654	0.577	0.217264	-1.46387	Down	MGI:1933155
Arl5a	ENSMUSG00000036093	22.8301	25.373	24.1016	0.105508	0.758	0.0799749	-1.11138	Down	MGI:1922673
Arl5b	ENSMUSG00000017418	10.4736	11.8332	11.1534	0.1219	0.551	0.0671669	-1.12981	Down	MGI:1923119
Arl5c	ENSMUSG00000038352	0.502672	0.248807	0.37574	0.675641	0.159	0.107427	2.02033	Up	MGI:3028577
Arl6	ENSMUSG00000022722	6.04959	6.9085	6.47905	0.132567	0.441	0.0584622	-1.14198	Down	MGI:1927136		abnormal male fertility
Arl6ip4	ENSMUSG00000029404	39.8514	30.9739	35.4126	0.250687	0.868	0.217597	1.28661	Up	MGI:1929500
Arl6ip5	ENSMUSG00000035199	10.4071	10.2351	10.3211	0.0166649	0.534	0.00889905	1.0168	Up	MGI:1929501
Arl6ip6	ENSMUSG00000026960	27.2836	29.7193	28.5014	0.0854588	0.806	0.0688798	-1.08927	Down	MGI:1929507
Arl8a	ENSMUSG00000026426	34.5239	30.0259	32.2749	0.139365	0.841	0.117206	1.1498	Up	MGI:1915974
Arl8b	ENSMUSG00000030105	9.21924	12.0594	10.6393	0.266949	0.539	0.143886	-1.30807	Down	MGI:1914416
Armc1	ENSMUSG00000027599	21.0177	29.6382	25.328	0.340355	0.773	0.263095	-1.41015	Down	MGI:1921502
Armc2	ENSMUSG00000071324	1.15285	0.591335	0.872092	0.643871	0.229	0.147446	1.94957	Up	MGI:1916449
Armc3	ENSMUSG00000037683	0.0986705	0.108278	0.103474	0.0928492	0.05	0.00464246	-1.09737	Down	MGI:1918132
Armc4	ENSMUSG00000061802	0.112356	0.100768	0.106562	0.108744	0.053	0.00576344	1.115	Up	MGI:1922184
Armc5	ENSMUSG00000042178	11.2194	10.7114	10.9654	0.0463275	0.547	0.0253412	1.04743	Up	MGI:2384586
Armc7	ENSMUSG00000057219	9.53459	7.58653	8.56056	0.227562	0.491	0.111733	1.25678	Up	MGI:2679719
Armc8	ENSMUSG00000032468	23.1354	25.8931	24.5143	0.112494	0.765	0.0860577	-1.1192	Down	MGI:1921375
Armc9	ENSMUSG00000062590	10.4547	8.82751	9.6411	0.168776	0.518	0.0874261	1.18433	Up	MGI:1926045
Armcx1	ENSMUSG00000033460	5.94525	5.49903	5.72214	0.0779813	0.421	0.0328301	1.08115	Up	MGI:1925498
Armcx2	ENSMUSG00000033436	17.9693	11.676	14.8226	0.424573	0.623	0.264509	1.53899	Up	MGI:1914666
Armcx3	ENSMUSG00000049047	4.6657	4.26765	4.46668	0.0891155	0.389	0.0346659	1.09327	Up	MGI:1918953
Armcx4	ENSMUSG00000049804	3.89239	3.04018	3.46629	0.245857	0.358	0.0880168	1.28032	Up	MGI:2147887
Armcx6	ENSMUSG00000050394	4.75555	2.22384	3.4897	0.725482	0.358	0.259722	2.13844	Up	MGI:2147993
Arntl	ENSMUSG00000055116	12.2708	7.71452	9.99266	0.455963	0.526	0.239836	1.59061	Up	MGI:1096381	cell differentiation
Arntl2	ENSMUSG00000040187	3.35856	2.80125	3.07991	0.18095	0.345	0.0624279	1.19895	Up	MGI:2684845
Arpc1a	ENSMUSG00000029621	79.7948	86.1615	82.9781	0.0767274	0.988	0.0758067	-1.07979	Down	MGI:1928896
Arpc1b	ENSMUSG00000029622	24.6772	25.0448	24.861	0.0147846	0.768	0.0113546	-1.01489	Down	MGI:1343142
Arpc2	ENSMUSG00000006304	66.2947	76.845	71.5699	0.147413	0.979	0.144317	-1.15914	Down	MGI:1923959	cell differentiation
Arpc3	ENSMUSG00000029465	57.8603	41.9539	49.9071	0.31872	0.939	0.299278	1.37914	Up	MGI:1928375
Arpc5	ENSMUSG00000008475	22.2541	35.4329	28.8435	0.456908	0.809	0.369639	-1.5922	Down	MGI:1915021
Arpp19	ENSMUSG00000007656	9.82913	15.2669	12.548	0.433359	0.58	0.251348	-1.55323	Down	MGI:1891691
Arrb1	ENSMUSG00000018909	2.57103	1.77669	2.17386	0.365405	0.31	0.113276	1.44709	Up	MGI:99473
Arrb2	ENSMUSG00000060216	64.4805	49.1106	56.7956	0.270618	0.957	0.258981	1.31297	Up	MGI:99474	cell differentiation
Arrdc1	ENSMUSG00000026972	18.9724	18.876	18.9242	0.00509401	0.687	0.00349958	1.00511	Up	MGI:2446136
Arrdc2	ENSMUSG00000002910	17.4272	14.3527	15.8899	0.193487	0.642	0.124219	1.21421	Up	MGI:1918057
Arrdc3	ENSMUSG00000074794	20.2219	22.0324	21.1272	0.0856988	0.721	0.0617888	-1.08954	Down	MGI:2145242
Arrdc4	ENSMUSG00000042659	14.8769	14.69	14.7834	0.0126425	0.622	0.00786364	1.01272	Up	MGI:1913662
Arrdc5	ENSMUSG00000073380	0.194078	0.584277	0.389178	1.00262	0.162	0.162425	-3.01053	Down	MGI:1924170
Arsa	ENSMUSG00000022620	1.33936	0.852846	1.09611	0.44386	0.248	0.110077	1.57046	Up	MGI:88077
Arsb	ENSMUSG00000042082	3.22322	1.6804	2.45181	0.629256	0.322	0.20262	1.91812	Up	MGI:88075	cell differentiation
Arsg	ENSMUSG00000020604	4.90126	4.65701	4.77914	0.0511076	0.397	0.0202897	1.05245	Up	MGI:1921258
Arsi	ENSMUSG00000036412	0.869833	0.581983	0.725908	0.396538	0.212	0.084066	1.4946	Up	MGI:2670959
Arsj	ENSMUSG00000046561	0.0768107	0.0307055	0.0537581	0.857642	0.003	0.00257293	2.50153	Up	MGI:2443513
Arsk	ENSMUSG00000021592	5.96513	5.83336	5.89925	0.0223368	0.425	0.00949312	1.02259	Up	MGI:1924291
Art1	ENSMUSG00000030996	1.16994	0.940765	1.05535	0.217155	0.245	0.053203	1.2436	Up	MGI:107511
Art3	ENSMUSG00000034842	15.5279	23.6182	19.5731	0.413339	0.698	0.28851	-1.52102	Down	MGI:1202729
Art4	ENSMUSG00000030217	0.583657	0.0415411	0.312599	1.73422	0.145	0.251462	14.0501	Up	MGI:1202710
Art5	ENSMUSG00000070424	3.24683	2.53116	2.88899	0.247723	0.338	0.0837303	1.28274	Up	MGI:107948
Artn	ENSMUSG00000028539	0.330252	0.494893	0.412573	0.39906	0.167	0.0666429	-1.49853	Down	MGI:1333791	cell differentiation
Arv1	ENSMUSG00000031982	12.4717	11.5229	11.9973	0.0790845	0.57	0.0450781	1.08234	Up	MGI:1916115
Arvcf	ENSMUSG00000098615	25.8176	21.077	23.4473	0.202181	0.75	0.151636	1.22492	Up
Arx	ENSMUSG00000035277	1.38583	0.276863	0.831346	1.33394	0.224	0.298803	5.00547	Up	MGI:1097716	cell proliferation;cell differentiation
Arxes1	ENSMUSG00000048355	10.7899	12.7104	11.7501	0.163445	0.564	0.0921828	-1.17799	Down	MGI:1923469	cell differentiation
Arxes2	ENSMUSG00000048040	18.4143	26.0655	22.2399	0.34403	0.735	0.252862	-1.4155	Down	MGI:1924226	cell differentiation
As3mt	ENSMUSG00000003559	9.66356	13.7922	11.7279	0.352036	0.564	0.198548	-1.42724	Down	MGI:1929882
Asah1	ENSMUSG00000031591	27.2019	32.0772	29.6395	0.164486	0.817	0.134385	-1.17923	Down	MGI:1277124
Asah2	ENSMUSG00000024887	2.72389	2.92187	2.82288	0.070134	0.336	0.023565	-1.07268	Down	MGI:1859310	cell proliferation
Asap1	ENSMUSG00000022377	30.8746	26.2867	28.5806	0.160525	0.807	0.129543	1.17453	Up	MGI:1342335
Asap2	ENSMUSG00000052632	6.57901	6.87517	6.72709	0.044025	0.448	0.0197232	-1.04502	Down	MGI:2685438
Asap3	ENSMUSG00000036995	3.15955	3.33648	3.24801	0.0544733	0.351	0.0191201	-1.056	Down	MGI:2684986
Asb10	ENSMUSG00000038204	0.228294	0.109668	0.168981	0.702008	0.093	0.0652867	2.08168	Up	MGI:2152836
Asb12	ENSMUSG00000031204	0.465276	0.339549	0.402413	0.312433	0.164	0.051239	1.37028	Up	MGI:1917642
Asb13	ENSMUSG00000033781	3.0794	1.96834	2.52387	0.440221	0.325	0.143072	1.56447	Up	MGI:2145525
Asb14	ENSMUSG00000021898	0.32764	0.220397	0.274018	0.391371	0.133	0.0520524	1.48659	Up	MGI:2655107
Asb16	ENSMUSG00000034768	1.05142	0.589812	0.820616	0.562514	0.223	0.125441	1.78264	Up	MGI:2654437
Asb17	ENSMUSG00000038997	0.376413	0.368514	0.372464	0.0212074	0.159	0.00337198	1.02143	Up	MGI:1914022
Asb2	ENSMUSG00000021200	0.741738	0.285499	0.513618	0.888284	0.184	0.163444	2.59804	Up	MGI:1929743	cell differentiation
Asb3	ENSMUSG00000020305	3.9548	13.7777	8.86625	1.1079	0.498	0.551733	-3.48379	Down	MGI:1929749
Asb4	ENSMUSG00000042607	0.353366	0.170719	0.262043	0.697013	0.129	0.0899147	2.06987	Up	MGI:1929751	cell differentiation
Asb5	ENSMUSG00000031519	1.44952	1.28632	1.36792	0.119305	0.266	0.0317352	1.12687	Up	MGI:1923544
Asb6	ENSMUSG00000039483	23.0537	18.0874	20.5705	0.241428	0.712	0.171897	1.27457	Up	MGI:1919573
Asb7	ENSMUSG00000030509	10.1216	3.99424	7.05792	0.868154	0.456	0.395878	2.53405	Up	MGI:2152835
Asb8	ENSMUSG00000048175	20.617	19.9814	20.2992	0.0313116	0.709	0.0221999	1.03181	Up	MGI:1925791
Asb9	ENSMUSG00000031384	18.0083	17.2862	17.6472	0.0409186	0.668	0.0273336	1.04177	Up	MGI:1916549
Ascc1	ENSMUSG00000044475	60.067	58.4784	59.2727	0.0268015	0.962	0.0257831	1.02717	Up	MGI:1916340
Ascc2	ENSMUSG00000020412	21.495	19.9466	20.7208	0.0747268	0.715	0.0534297	1.07763	Up	MGI:1922702
Ascc3	ENSMUSG00000038774	13.3634	15.6947	14.529	0.160458	0.618	0.0991629	-1.17445	Down	MGI:1925237	cell proliferation
Ascl1	ENSMUSG00000020052	0.271471	0.0963956	0.183933	0.951842	0.099	0.0942323	2.81622	Up	MGI:96919	cell proliferation;cell differentiation
Ascl2	ENSMUSG00000009248	23.099	15.8247	19.4618	0.373772	0.696	0.260146	1.45968	Up	MGI:96920	cell proliferation;cell differentiation
Ascl3	ENSMUSG00000035951	0.19109	0	0.095545	2	0.044	0.088	0	Up	MGI:1928820
Ascl4	ENSMUSG00000085111	0.685569	0.8928	0.789184	0.262589	0.22	0.0577695	-1.30228	Down	MGI:1914591
Asf1a	ENSMUSG00000019857	17.906	39.0871	28.4965	0.743286	0.806	0.599089	-2.18291	Down	MGI:1913653	cell differentiation
Asf1b	ENSMUSG00000005470	72.1413	101.487	86.8141	0.338029	0.99	0.334649	-1.40678	Down	MGI:1914179
Asgr1	ENSMUSG00000020884	0.402681	0.313937	0.358309	0.247674	0.155	0.0383895	1.28268	Up	MGI:88081
Asgr2	ENSMUSG00000040963	1.28741	0.842952	1.06518	0.417261	0.246	0.102646	1.52726	Up	MGI:88082
Ash1l	ENSMUSG00000028053	20.181	29.1935	24.6872	0.365067	0.766	0.279641	-1.44658	Down	MGI:2183158		abnormal male fertility
Ash2l	ENSMUSG00000031575	48.4887	53.0624	50.7755	0.0900768	0.942	0.0848524	-1.09433	Down	MGI:1344416	cell proliferation
Asna1	ENSMUSG00000052456	68.2759	65.2494	66.7626	0.0453322	0.974	0.0441536	1.04638	Up	MGI:1928379
Asns	ENSMUSG00000029752	41.7333	39.805	40.7691	0.047298	0.9	0.0425682	1.04844	Up	MGI:1350929
Asnsd1	ENSMUSG00000026095	34.7979	43.0773	38.9376	0.212633	0.889	0.18903	-1.23793	Down	MGI:1917646
Aspa	ENSMUSG00000020774	1.38679	0.993357	1.19007	0.330596	0.255	0.0843019	1.39606	Up	MGI:87914	cell differentiation
Aspg	ENSMUSG00000037686	3.77213	2.01827	2.8952	0.605782	0.338	0.204754	1.86899	Up	MGI:2144822
Asph	ENSMUSG00000028207	6.33918	5.52291	5.93105	0.137627	0.426	0.058629	1.1478	Up	MGI:1914186	cell proliferation
Asphd2	ENSMUSG00000029348	10.196	8.01585	9.10592	0.239421	0.504	0.120668	1.27198	Up	MGI:1920148
Aspm	ENSMUSG00000033952	15.9591	14.2648	15.112	0.112117	0.629	0.0705213	1.11877	Up	MGI:1334448	cell proliferation;cell differentiation	abnormal male fertility
Asprv1	ENSMUSG00000033508	0.30768	0.38785	0.347765	0.230529	0.153	0.035271	-1.26056	Down	MGI:1915105
Aspscr1	ENSMUSG00000025142	63.8604	50.8964	57.3784	0.225939	0.959	0.216675	1.25471	Up	MGI:1916188
Asrgl1	ENSMUSG00000024654	5.5707	7.40938	6.49004	0.283308	0.441	0.124939	-1.33006	Down	MGI:1913764
Ass1	ENSMUSG00000076441	6.84369	4.36928	5.60648	0.441348	0.419	0.184925	1.56632	Up	MGI:88090
Aste1	ENSMUSG00000032567	8.71919	7.96249	8.34084	0.0907223	0.486	0.044091	1.09503	Up	MGI:1913845
Astn1	ENSMUSG00000026587	0.230912	0.170037	0.200474	0.303655	0.106	0.0321874	1.35801	Up	MGI:1098567	cell differentiation
Astn2	ENSMUSG00000028373	0.726291	0.0905594	0.408425	1.55654	0.166	0.258386	8.02005	Up	MGI:1889277
Asxl1	ENSMUSG00000042548	34.8038	36.8002	35.802	0.0557622	0.871	0.0485689	-1.05736	Down	MGI:2684063	cell differentiation
Asxl2	ENSMUSG00000037486	11.3318	10.6647	10.9982	0.0606551	0.548	0.033239	1.06255	Up	MGI:1922552	cell differentiation
Asxl3	ENSMUSG00000045215	1.58441	1.2184	1.40141	0.261174	0.268	0.0699945	1.3004	Up	MGI:2685175
Asz1	ENSMUSG00000010796	35.8135	36.97	36.3918	0.0317792	0.874	0.027775	-1.03229	Down	MGI:1921318	cell differentiation	abnormal male fertility
Atad1	ENSMUSG00000013662	20.6088	28.8517	24.7302	0.333312	0.767	0.255651	-1.39997	Down	MGI:1915229
Atad2	ENSMUSG00000022360	18.4105	21.988	20.1992	0.177111	0.707	0.125217	-1.19432	Down	MGI:1917722
Atad2b	ENSMUSG00000052812	8.98285	9.14561	9.06423	0.0179563	0.503	0.00903202	-1.01812	Down	MGI:2444798
Atad3a	ENSMUSG00000029036	25.8956	26.0182	25.9569	0.00472321	0.78	0.00368411	-1.00473	Down	MGI:1919214
Atad5	ENSMUSG00000017550	9.57711	16.0785	12.8278	0.50682	0.585	0.29649	-1.67885	Down	MGI:2442925	cell proliferation
Atat1	ENSMUSG00000024426	13.5815	8.14014	10.8608	0.501008	0.544	0.272548	1.66846	Up	MGI:1913869	cell differentiation	abnormal male fertility
Ate1	ENSMUSG00000030850	19.666	23.3222	21.4941	0.170102	0.725	0.123324	-1.18591	Down	MGI:1333870		abnormal male fertility
Atf1	ENSMUSG00000023027	22.6897	33.3599	28.0248	0.380741	0.802	0.305355	-1.47027	Down	MGI:1298366	cell differentiation
Atf2	ENSMUSG00000027104	30.0869	32.767	31.427	0.0852803	0.834	0.0711238	-1.08908	Down	MGI:109349	cell proliferation;cell differentiation
Atf3	ENSMUSG00000026628	4.37242	4.33237	4.35239	0.00920183	0.386	0.00355191	1.00924	Up	MGI:109384	cell proliferation;cell differentiation
Atf6	ENSMUSG00000026663	11.8264	13.5999	12.7131	0.139501	0.583	0.0813292	-1.14996	Down	MGI:1926157
Atf6b	ENSMUSG00000015461	51.4583	48.1469	49.8026	0.0664905	0.939	0.0624346	1.06878	Up	MGI:105121
Atf7	ENSMUSG00000099083	21.7473	24.3862	23.0667	0.114403	0.745	0.0852301	-1.12134	Down	MGI:2443472
Atf7ip	ENSMUSG00000030213	39.1122	35.1725	37.1424	0.10607	0.878	0.0931297	1.11201	Up	MGI:1858965
Atg10	ENSMUSG00000021619	7.12196	6.33735	6.72965	0.11659	0.448	0.0522323	1.12381	Up	MGI:1914045
Atg12	ENSMUSG00000032905	25.746	32.36	29.053	0.227653	0.811	0.184627	-1.25689	Down	MGI:1914776
Atg13	ENSMUSG00000027244	27.7844	26.8242	27.3043	0.0351666	0.794	0.0279223	1.0358	Up	MGI:1196429
Atg14	ENSMUSG00000037526	26.8994	24.4933	25.6964	0.0936359	0.777	0.0727551	1.09824	Up	MGI:1261775
Atg16l1	ENSMUSG00000026289	30.9737	30.0459	30.5098	0.0304099	0.825	0.0250882	1.03088	Up	MGI:1924290
Atg16l2	ENSMUSG00000047767	4.62531	2.94747	3.78639	0.443124	0.368	0.16307	1.56925	Up	MGI:1920933
Atg2a	ENSMUSG00000106907	39.4785	31.0109	35.2447	0.240252	0.866	0.208058	1.27305	Up
Atg2b	ENSMUSG00000041341	17.5175	19.4101	18.4638	0.102503	0.679	0.0695997	-1.10804	Down	MGI:1923809
Atg3	ENSMUSG00000022663	7.84114	5.89218	6.86666	0.283829	0.452	0.128291	1.33077	Up	MGI:1915091
Atg4a	ENSMUSG00000079418	1.6802	2.22029	1.95024	0.276934	0.299	0.0828034	-1.32144	Down	MGI:2147903
Atg4b	ENSMUSG00000026280	40.0904	42.1096	41.1	0.049129	0.901	0.0442652	-1.05037	Down	MGI:1913865
Atg4c	ENSMUSG00000028550	2.85395	3.17249	3.01322	0.105714	0.343	0.03626	-1.11161	Down	MGI:2651854
Atg4d	ENSMUSG00000002820	26.481	22.0169	24.249	0.184095	0.76	0.139912	1.20276	Up	MGI:2444308
Atg5	ENSMUSG00000038160	30.0482	37.2963	33.6723	0.215254	0.852	0.183397	-1.24122	Down	MGI:1277186	cell differentiation
Atg7	ENSMUSG00000030314	17.9355	15.4334	16.6845	0.149966	0.653	0.0979278	1.16212	Up	MGI:1921494	cell differentiation
Atg9b	ENSMUSG00000038295	2.34215	1.94526	2.14371	0.185142	0.308	0.0570238	1.20403	Up	MGI:2685420
Athl1	ENSMUSG00000062031	11.286	6.70149	8.99375	0.509744	0.502	0.255892	1.6841	Up	MGI:2444047
Atic	ENSMUSG00000026192	58.8085	54.524	56.6663	0.0756094	0.957	0.0723582	1.07858	Up	MGI:1351352
Atl2	ENSMUSG00000059811	11.7798	16.3745	14.0771	0.326394	0.61	0.199101	-1.39005	Down	MGI:1929492
Atl3	ENSMUSG00000024759	16.7293	25.0425	20.8859	0.398029	0.717	0.285387	-1.49692	Down	MGI:1924270
Atm	ENSMUSG00000034218	16.8487	22.0324	19.4406	0.266644	0.696	0.185584	-1.30766	Down	MGI:107202	cell proliferation;cell differentiation	abnormal male fertility;abnormal spermatogenesis
Atn1	ENSMUSG00000004263	42.4146	28.2703	35.3424	0.400207	0.867	0.34698	1.50032	Up	MGI:104725		abnormal male fertility
Atoh7	ENSMUSG00000036816	1.34876	0.264308	0.806534	1.34458	0.222	0.298497	5.10299	Up	MGI:1355553	cell differentiation
Atoh8	ENSMUSG00000037621	19.921	14.0882	17.0046	0.343013	0.659	0.226046	1.41402	Up	MGI:1918343	cell proliferation;cell differentiation
Atox1	ENSMUSG00000018585	40.6747	35.1563	37.9155	0.145545	0.883	0.128516	1.15697	Up	MGI:1333855
Atp10a	ENSMUSG00000025324	5.4342	4.52668	4.98044	0.182217	0.402	0.0732512	1.20048	Up	MGI:1330809
Atp11b	ENSMUSG00000037400	28.9965	40.0733	34.5349	0.320742	0.859	0.275518	-1.382	Down	MGI:1923545
Atp11c	ENSMUSG00000108408	8.41426	14.3339	11.3741	0.52045	0.557	0.289891	-1.70352	Down
Atp12a	ENSMUSG00000022229	1.83554	2.0935	1.96452	0.131309	0.299	0.0392615	-1.14054	Down	MGI:1926943
Atp13a1	ENSMUSG00000031862	36.8447	32.1399	34.4923	0.136401	0.859	0.117169	1.14639	Up	MGI:2180801
Atp13a2	ENSMUSG00000036622	37.3315	34.056	35.6937	0.0917668	0.87	0.0798371	1.09618	Up	MGI:1922022
Atp13a3	ENSMUSG00000022533	19.4488	33.6285	26.5387	0.534304	0.786	0.419963	-1.72908	Down	MGI:2685387
Atp13a4	ENSMUSG00000038094	3.74497	6.03085	4.88791	0.46766	0.4	0.187064	-1.61039	Down	MGI:1924456
Atp13a5	ENSMUSG00000048939	0.0971153	0.0729272	0.0850212	0.284495	0.035	0.00995732	1.33167	Up	MGI:2444068
Atp1a1	ENSMUSG00000033161	102.269	113.901	108.085	0.107619	0.996	0.107189	-1.11374	Down	MGI:88105
Atp1a3	ENSMUSG00000040907	3.56324	1.74963	2.65644	0.682723	0.329	0.224616	2.03657	Up	MGI:88107
Atp1b3	ENSMUSG00000032412	43.4348	62.6335	53.0341	0.362006	0.948	0.343182	-1.44201	Down	MGI:107788
Atp1b4	ENSMUSG00000016327	0.0951575	0.0998607	0.0975091	0.0482334	0.046	0.00221874	-1.04943	Down	MGI:1915071
Atp2a2	ENSMUSG00000029467	38.0411	51.0735	44.5573	0.292486	0.918	0.268502	-1.34259	Down	MGI:88110	cell differentiation
Atp2a3	ENSMUSG00000020788	1.32181	0.759697	1.04075	0.540102	0.244	0.131785	1.73992	Up	MGI:1194503
Atp2b1	ENSMUSG00000019943	30.8671	41.9791	36.4231	0.305081	0.874	0.266641	-1.35999	Down	MGI:104653
Atp2b2	ENSMUSG00000030302	0.370327	0.261819	0.316073	0.3433	0.146	0.0501219	1.41444	Up	MGI:105368	cell differentiation
Atp2b3	ENSMUSG00000031376	0.962284	1.05473	1.00851	0.0916662	0.241	0.0220916	-1.09607	Down	MGI:1347353
Atp2b4	ENSMUSG00000026463	20.3858	22.7383	21.562	0.109104	0.726	0.0792093	-1.1154	Down	MGI:88111		abnormal male fertility
Atp2c1	ENSMUSG00000032570	22.1164	33.1504	27.6334	0.399299	0.797	0.318242	-1.49891	Down	MGI:1889008
Atp2c2	ENSMUSG00000034112	0.170631	0.0636784	0.117155	0.912918	0.061	0.055688	2.67957	Up	MGI:1916297
Atp4a	ENSMUSG00000005553	2.86786	2.91855	2.89321	0.0175204	0.338	0.00592188	-1.01768	Down	MGI:88113
Atp5a1	ENSMUSG00000025428	126.073	128.48	127.276	0.0189116	0.998	0.0188738	-1.01909	Down	MGI:88115	cell proliferation
Atp5b	ENSMUSG00000025393	121.705	123.018	122.362	0.0107305	0.997	0.0106983	-1.01079	Down	MGI:107801
Atp5c1	ENSMUSG00000025781	45.6044	54.0675	49.8359	0.169819	0.939	0.15946	-1.18558	Down	MGI:1261437
Atp5e	ENSMUSG00000016252	57.4249	67.9699	62.6974	0.168189	0.968	0.162807	-1.18363	Down	MGI:1855697
Atp5f1	ENSMUSG00000000563	40.9042	66.2147	53.5594	0.472568	0.95	0.44894	-1.61878	Down	MGI:1100495
Atp5g1	ENSMUSG00000006057	24.0963	24.8825	24.4894	0.0321037	0.764	0.0245272	-1.03263	Down	MGI:107653
Atp5g2	ENSMUSG00000062683	33.109	36.4188	34.7639	0.095208	0.862	0.0820693	-1.09997	Down	MGI:1915192
Atp5g3	ENSMUSG00000018770	85.9678	97.0997	91.5337	0.121615	0.992	0.120642	-1.12949	Down	MGI:2442035
Atp5h	ENSMUSG00000034566	25.0181	24.533	24.7756	0.0195798	0.767	0.0150177	1.01977	Up	MGI:1918929
Atp5j	ENSMUSG00000022890	57.7522	68.2464	62.9993	0.166576	0.968	0.161246	-1.18171	Down	MGI:107777
Atp5j2	ENSMUSG00000038690	72.4908	61.122	66.8064	0.170175	0.974	0.165751	1.186	Up	MGI:1927558
Atp5k	ENSMUSG00000050856	4.35634	29.741	17.0487	1.48895	0.659	0.98122	-6.82706	Down	MGI:106636
Atp5l	ENSMUSG00000038717	0.606764	1.67168	1.13922	0.934775	0.251	0.234628	-2.75507	Down	MGI:1351597
Atp5o	ENSMUSG00000022956	51.2173	53.1245	52.1709	0.0365568	0.946	0.0345827	-1.03724	Down	MGI:106341
Atp5s	ENSMUSG00000054894	4.73989	5.43874	5.08932	0.137317	0.405	0.0556134	-1.14744	Down	MGI:1915305
Atp5sl	ENSMUSG00000057229	28.1627	23.4814	25.8221	0.181291	0.778	0.141044	1.19936	Up	MGI:1913599
Atp6ap1	ENSMUSG00000019087	36.4328	40.5904	38.5116	0.107957	0.887	0.0957579	-1.11412	Down	MGI:109629	cell differentiation
Atp6ap1l	ENSMUSG00000078958	0.617144	0.158474	0.387809	1.18272	0.162	0.191601	3.89429	Up	MGI:3648665
Atp6ap2	ENSMUSG00000031007	29.2104	34.2283	31.7193	0.158197	0.836	0.132253	-1.17178	Down	MGI:1917745
Atp6v0a1	ENSMUSG00000019302	20.0885	17.8894	18.9889	0.115809	0.688	0.0796769	1.12293	Up	MGI:103286
Atp6v0a2	ENSMUSG00000038023	8.56404	7.89547	8.22975	0.0812374	0.483	0.0392377	1.08468	Up	MGI:104855
Atp6v0b	ENSMUSG00000033379	19.085	24.9317	22.0084	0.26566	0.733	0.194729	-1.30635	Down	MGI:1890510
Atp6v0e	ENSMUSG00000015575	40.2655	52.9836	46.6245	0.272777	0.928	0.253137	-1.31586	Down	MGI:1328318
Atp6v0e2	ENSMUSG00000039347	17.5983	17.3713	17.4848	0.0129827	0.666	0.00864648	1.01307	Up	MGI:1923502
Atp6v1a	ENSMUSG00000052459	34.757	42.4457	38.6013	0.199182	0.888	0.176874	-1.22121	Down	MGI:1201780
Atp6v1b1	ENSMUSG00000006269	0.0638702	0.178019	0.120945	0.943811	0.064	0.0604039	-2.7872	Down	MGI:103285
Atp6v1b2	ENSMUSG00000006273	57.1033	59.7478	58.4256	0.0452627	0.961	0.0434975	-1.04631	Down	MGI:109618
Atp6v1c1	ENSMUSG00000022295	39.1224	47.4334	43.2779	0.192038	0.912	0.175139	-1.21244	Down	MGI:1913585
Atp6v1d	ENSMUSG00000021114	24.1861	28.6703	26.4282	0.169675	0.785	0.133195	-1.1854	Down	MGI:1921084
Atp6v1e1	ENSMUSG00000019210	34.9516	42.6514	38.8015	0.198441	0.889	0.176414	-1.2203	Down	MGI:894326
Atp6v1f	ENSMUSG00000004285	60.2081	59.2106	59.7094	0.0167059	0.963	0.0160878	1.01685	Up	MGI:1913394
Atp6v1g1	ENSMUSG00000039105	26.6606	38.6864	32.6735	0.36806	0.844	0.310642	-1.45107	Down	MGI:1913540
Atp6v1g2	ENSMUSG00000024403	2.53927	2.46255	2.50091	0.0306768	0.324	0.00993929	1.03115	Up	MGI:1913487
Atp6v1h	ENSMUSG00000033793	24.4935	40.1146	32.3041	0.483565	0.841	0.406678	-1.63777	Down	MGI:1914864
Atp7a	ENSMUSG00000033792	13.732	19.7822	16.7571	0.361053	0.655	0.23649	-1.44059	Down	MGI:99400	cell proliferation;cell differentiation	abnormal male fertility
Atp7b	ENSMUSG00000006567	2.85399	2.66569	2.75984	0.0682286	0.333	0.0227201	1.07064	Up	MGI:103297
Atp8a1	ENSMUSG00000037685	5.05518	7.76505	6.41011	0.422749	0.438	0.185164	-1.53606	Down	MGI:1330848
Atp8a2	ENSMUSG00000021983	9.62948	13.0109	11.3202	0.298707	0.555	0.165782	-1.35115	Down	MGI:1354710	cell differentiation
Atp8b1	ENSMUSG00000039529	1.68298	1.85251	1.76775	0.0959018	0.289	0.0277156	-1.10073	Down	MGI:1859665	cell differentiation
Atp8b2	ENSMUSG00000060671	46.9031	52.5899	49.7465	0.114316	0.939	0.107342	-1.12125	Down	MGI:1859660
Atp8b3	ENSMUSG00000003341	2.27086	2.05346	2.16216	0.100548	0.309	0.0310692	1.10587	Up	MGI:1914581		abnormal male fertility
Atp8b4	ENSMUSG00000060131	0.111897	0.233427	0.172662	0.703861	0.095	0.0668668	-2.08609	Down	MGI:1859664
Atp8b5	ENSMUSG00000028457	6.74047	4.87628	5.80837	0.320949	0.424	0.136082	1.3823	Up	MGI:2444287
Atp9a	ENSMUSG00000027546	51.4505	44.8698	48.1602	0.136642	0.934	0.127624	1.14666	Up	MGI:1330826
Atp9b	ENSMUSG00000024566	21.4182	27.1263	24.2722	0.23517	0.761	0.178964	-1.26651	Down	MGI:1354757
Atpaf1	ENSMUSG00000028710	2.6721	3.13316	2.90263	0.158841	0.338	0.0536881	-1.17254	Down	MGI:2180560
Atpaf2	ENSMUSG00000042709	21.5736	32.8569	27.2153	0.414595	0.793	0.328774	-1.52301	Down	MGI:2180561
Atpif1	ENSMUSG00000054428	36.652	35.2472	35.9496	0.0390789	0.871	0.0340377	1.03986	Up	MGI:1196457	cell proliferation;cell differentiation
Atr	ENSMUSG00000032409	23.1463	41.1559	32.1511	0.560155	0.84	0.47053	-1.77808	Down	MGI:108028
Atrip	ENSMUSG00000025646	8.58055	9.50552	9.04303	0.102285	0.502	0.0513472	-1.1078	Down	MGI:1925349
Atrn	ENSMUSG00000027312	14.665	16.2679	15.4665	0.103637	0.635	0.0658096	-1.1093	Down	MGI:1341628
Atrnl1	ENSMUSG00000054843	14.7997	19.7403	17.27	0.28608	0.663	0.189671	-1.33383	Down	MGI:2147749
Atrx	ENSMUSG00000031229	14.039	18.4104	16.2247	0.269429	0.646	0.174051	-1.31138	Down	MGI:103067	cell differentiation
Atxn1	ENSMUSG00000046876	1.30669	1.99429	1.65049	0.416604	0.282	0.117482	-1.52622	Down	MGI:104783	cell proliferation;cell differentiation
Atxn10	ENSMUSG00000016541	43.8565	57.3933	50.6249	0.267394	0.942	0.251885	-1.30866	Down	MGI:1859293	cell differentiation
Atxn1l	ENSMUSG00000069895	5.29183	5.21333	5.25258	0.0149447	0.409	0.00611237	1.01506	Up	MGI:3694797	cell proliferation
Atxn2	ENSMUSG00000042605	38.1019	30.7996	34.4507	0.211963	0.858	0.181865	1.23709	Up	MGI:1277223	cell differentiation
Atxn2l	ENSMUSG00000032637	70.4107	59.0745	64.7426	0.175096	0.971	0.170019	1.1919	Up	MGI:2446242
Atxn3	ENSMUSG00000021189	7.31912	10.448	8.88356	0.35221	0.499	0.175753	-1.42749	Down	MGI:1099442
Atxn7	ENSMUSG00000021738	10.6644	8.34505	9.50473	0.244021	0.515	0.125671	1.27793	Up	MGI:2179277		abnormal male fertility
Atxn7l1	ENSMUSG00000020564	5.45813	3.63441	4.54627	0.401146	0.39	0.156447	1.50179	Up	MGI:3584458
Atxn7l3	ENSMUSG00000059995	13.4483	14.0473	13.7478	0.0435706	0.604	0.0263166	-1.04454	Down	MGI:3036270
Atxn7l3b	ENSMUSG00000074748	34.2795	44.2087	39.2441	0.253011	0.891	0.225433	-1.28965	Down	MGI:1914971
AU015228	ENSMUSG00000074804	0.2572	0.366772	0.311986	0.351208	0.144	0.050574	-1.42602	Down	MGI:2139152
AU015836	ENSMUSG00000081044	69.7853	73.7294	71.7574	0.0549644	0.98	0.0538651	-1.05652	Down	MGI:2147954
AU018091	ENSMUSG00000054753	0.863835	0.569503	0.716669	0.410694	0.211	0.0866565	1.51682	Up	MGI:2142124
AU021092	ENSMUSG00000051669	2.92628	4.46183	3.69406	0.415681	0.365	0.151724	-1.52474	Down	MGI:2146559
AU022751	ENSMUSG00000073294	15.6101	13.4824	14.5463	0.146271	0.618	0.0903957	1.15781	Up	MGI:2147968
AU041133	ENSMUSG00000078435	0.853756	1.13143	0.992593	0.279746	0.24	0.0671391	-1.32524	Down	MGI:2143755
Auh	ENSMUSG00000021460	13.7065	11.7185	12.7125	0.156382	0.583	0.0911704	1.16965	Up	MGI:1338011
Aup1	ENSMUSG00000068328	39.947	50.5155	45.2313	0.233655	0.921	0.215196	-1.26456	Down	MGI:107789
Aurka	ENSMUSG00000027496	31.483	27.5867	29.5348	0.131922	0.816	0.107648	1.14124	Up	MGI:894678	cell differentiation
Aurkb	ENSMUSG00000020897	39.2105	33.5339	36.3722	0.15607	0.874	0.136405	1.16928	Up	MGI:107168		abnormal male fertility;abnormal spermatogenesis
Aurkc	ENSMUSG00000070837	1.16266	0.736097	0.949379	0.449308	0.235	0.105587	1.57949	Up	MGI:1321119	cell differentiation
Auts2	ENSMUSG00000029673	23.9277	18.9067	21.4172	0.234438	0.724	0.169733	1.26557	Up	MGI:1919847	cell differentiation
Aven	ENSMUSG00000003604	20.9623	20.2628	20.6125	0.0339356	0.713	0.0241961	1.03452	Up	MGI:1921518
Avil	ENSMUSG00000025432	0.382714	0.278947	0.330831	0.313656	0.15	0.0470484	1.372	Up	MGI:1333798	cell differentiation
Avl9	ENSMUSG00000029787	10.7886	16.3053	13.5469	0.407228	0.6	0.244337	-1.51135	Down	MGI:1926187
Avp	ENSMUSG00000037727	0.556655	0.763942	0.660299	0.313929	0.204	0.0640416	-1.37238	Down	MGI:88121	cell proliferation
Avpi1	ENSMUSG00000018821	10.9588	8.59357	9.77618	0.241938	0.52	0.125808	1.27523	Up	MGI:1916784
Avpr1a	ENSMUSG00000020123	0.0923654	0.124968	0.108667	0.300024	0.054	0.0162013	-1.35297	Down	MGI:1859216	cell proliferation
AW011738	ENSMUSG00000078349	0.064321	0.084151	0.074236	0.267121	0.025	0.00667803	-1.3083	Down	MGI:2140540
AW209491	ENSMUSG00000039182	8.43604	7.98629	8.21117	0.054773	0.483	0.0264554	1.05632	Up	MGI:2145422
AW551984	ENSMUSG00000038112	0.170095	0.105491	0.137793	0.468848	0.074	0.0346948	1.61241	Up	MGI:2143322	cell differentiation
AW554918	ENSMUSG00000033632	8.53964	8.9312	8.73542	0.0448244	0.495	0.0221881	-1.04585	Down	MGI:2147376
Awat2	ENSMUSG00000031220	0.220486	0.25838	0.239433	0.158266	0.122	0.0193084	-1.17187	Down	MGI:3045345
Axin1	ENSMUSG00000024182	51.3912	50.2409	50.8161	0.0226365	0.942	0.0213236	1.0229	Up	MGI:1096327	cell differentiation
Axin2	ENSMUSG00000000142	15.9807	14.0814	15.0311	0.126358	0.628	0.0793531	1.13488	Up	MGI:1270862	cell proliferation;cell differentiation
Axl	ENSMUSG00000002602	61.5347	58.0092	59.772	0.0589825	0.963	0.0568002	1.06077	Up	MGI:1347244	cell differentiation
AY074887	ENSMUSG00000044820	1.3235	1.71582	1.51966	0.258163	0.275	0.0709948	-1.29643	Down	MGI:3575512	cell proliferation
AY358078	ENSMUSG00000050961	4.96141	4.38682	4.67412	0.12293	0.394	0.0484345	1.13098	Up	MGI:2682312
Aym1	ENSMUSG00000053873	0.102269	0.126964	0.114616	0.215458	0.059	0.012712	-1.24147	Down	MGI:1891321
Azi2	ENSMUSG00000039285	14.8862	16.6957	15.7909	0.114591	0.64	0.0733382	-1.12156	Down	MGI:1351332	cell proliferation;cell differentiation
Azin1	ENSMUSG00000037458	20.4704	27.2513	23.8608	0.284185	0.755	0.21456	-1.33125	Down	MGI:1859169
B130006D01Rik	ENSMUSG00000075596	0.0764721	0.147938	0.112205	0.636922	0.057	0.0363046	-1.93454	Down	MGI:2444371
B230118H07Rik	ENSMUSG00000027165	18.4534	25.2217	21.8376	0.309939	0.73	0.226255	-1.36678	Down	MGI:1915420
B230217C12Rik	ENSMUSG00000050538	2.30279	1.74092	2.02185	0.277898	0.303	0.0842032	1.32274	Up	MGI:1915377
B230219D22Rik	ENSMUSG00000045767	15.7079	21.1951	18.4515	0.297385	0.679	0.201924	-1.34933	Down	MGI:1925771
B2m	ENSMUSG00000060802	21.1649	18.0686	19.6167	0.15784	0.699	0.11033	1.17136	Up	MGI:88127	cell differentiation
B3galnt1	ENSMUSG00000043300	14.1086	15.9516	15.0301	0.122621	0.628	0.0770057	-1.13063	Down	MGI:1349405
B3galnt2	ENSMUSG00000039242	11.5317	16.3839	13.9578	0.347634	0.607	0.211014	-1.42077	Down	MGI:2145517
B3galt5	ENSMUSG00000074892	0.0339822	0.0765571	0.0552697	0.770312	0.005	0.00385156	-2.25286	Down	MGI:2136878
B3galt6	ENSMUSG00000050796	3.53744	5.09712	4.31728	0.361264	0.385	0.139087	-1.44091	Down	MGI:2152819
B3gat1	ENSMUSG00000045994	0.352155	0.141346	0.24675	0.854341	0.125	0.106793	2.49144	Up	MGI:1924148
B3gat3	ENSMUSG00000071649	25	24.7008	24.8504	0.01204	0.768	0.00924676	1.01211	Up	MGI:1919977
B3gnt2	ENSMUSG00000051650	4.67961	3.82803	4.25382	0.200192	0.383	0.0766735	1.22246	Up	MGI:1889505	cell differentiation
B3gnt3	ENSMUSG00000031803	0.241796	0.182322	0.212059	0.28046	0.111	0.031131	1.3262	Up	MGI:2152535
B3gnt4	ENSMUSG00000029431	3.06758	4.3369	3.70224	0.342852	0.365	0.125141	-1.41379	Down	MGI:2680208
B3gnt5	ENSMUSG00000022686	0.921873	0.711183	0.816528	0.258032	0.223	0.057541	1.29625	Up	MGI:2137302
B3gnt6	ENSMUSG00000074004	0.136206	0.160141	0.148174	0.161534	0.081	0.0130842	-1.17573	Down	MGI:3039603
B3gnt7	ENSMUSG00000079445	8.95646	6.05522	7.50584	0.386531	0.468	0.180897	1.47913	Up	MGI:2384394
B3gnt8	ENSMUSG00000059479	2.71317	4.69741	3.70529	0.535515	0.366	0.195999	-1.73134	Down	MGI:2385269
B3gntl1	ENSMUSG00000046605	5.18968	5.0909	5.14029	0.0192168	0.407	0.00782124	1.0194	Up	MGI:2441705
B430306N03Rik	ENSMUSG00000043740	2.22548	1.32148	1.77348	0.509732	0.289	0.147313	1.68408	Up	MGI:2443478
B4galnt2	ENSMUSG00000013418	2.05019	2.1292	2.08969	0.0378134	0.306	0.0115709	-1.03854	Down	MGI:1342058
B4galnt3	ENSMUSG00000041372	4.15914	3.75705	3.9581	0.101587	0.373	0.0378919	1.10702	Up	MGI:3041155
B4galnt4	ENSMUSG00000055629	5.27966	2.6168	3.94823	0.674446	0.373	0.251568	2.01761	Up	MGI:2652891
B4galt1	ENSMUSG00000028413	55.6132	59.0931	57.3531	0.060675	0.959	0.0581873	-1.06257	Down	MGI:95705	cell proliferation;cell differentiation	abnormal spermatogenesis
B4galt2	ENSMUSG00000028541	36.6209	31.1353	33.8781	0.161922	0.854	0.138281	1.17619	Up	MGI:1858493
B4galt3	ENSMUSG00000052423	26.5718	23.0243	24.798	0.143056	0.767	0.109724	1.15408	Up	MGI:1928767
B4galt4	ENSMUSG00000022793	12.6501	11.297	11.9735	0.113007	0.569	0.0643012	1.11978	Up	MGI:1928387
B4galt5	ENSMUSG00000017929	20.6162	21.0063	20.8113	0.0187447	0.716	0.0134212	-1.01892	Down	MGI:1927169
B4galt6	ENSMUSG00000056124	3.59527	4.56067	4.07797	0.236735	0.377	0.0892493	-1.26852	Down	MGI:1928380
B4galt7	ENSMUSG00000021504	9.08468	9.79104	9.43786	0.0748432	0.513	0.0383946	-1.07775	Down	MGI:2384987	cell proliferation
B630019K06Rik	ENSMUSG00000052364	10.1963	8.35506	9.27568	0.198502	0.508	0.100839	1.22037	Up	MGI:2147918
B9d1	ENSMUSG00000001039	14.994	11.6619	13.3279	0.250008	0.595	0.148755	1.28573	Up	MGI:1351471	cell differentiation
Baalc	ENSMUSG00000022296	0.252896	0.269245	0.26107	0.0626229	0.128	0.00801574	-1.06465	Down	MGI:1928704
Bace1	ENSMUSG00000032086	2.6471	2.14654	2.39682	0.208843	0.32	0.0668299	1.23319	Up	MGI:1346542
Bace2	ENSMUSG00000040605	1.33957	0.394234	0.866902	1.09048	0.228	0.248629	3.39791	Up	MGI:1860440
Bach1	ENSMUSG00000025612	13.0921	11.3765	12.2343	0.140229	0.575	0.0806315	1.1508	Up	MGI:894680
Bach2	ENSMUSG00000040270	2.0717	2.10049	2.0861	0.0138009	0.306	0.00422308	-1.0139	Down	MGI:894679
Bad	ENSMUSG00000024959	19.8107	14.0177	16.9142	0.342493	0.657	0.225018	1.41326	Up	MGI:1096330	cell proliferation;cell differentiation
Bag1	ENSMUSG00000028416	34.3097	35.8138	35.0618	0.0428986	0.864	0.0370644	-1.04384	Down	MGI:108047	cell differentiation
Bag2	ENSMUSG00000042215	15.5341	14.9887	15.2614	0.0357372	0.631	0.0225502	1.03639	Up	MGI:1891254
Bag3	ENSMUSG00000030847	13.6648	8.28003	10.9724	0.490755	0.547	0.268443	1.65033	Up	MGI:1352493
Bag4	ENSMUSG00000037316	6.75602	10.0574	8.40671	0.392708	0.487	0.191249	-1.48866	Down	MGI:1914634
Bag5	ENSMUSG00000049792	10.4111	12.096	11.2536	0.149722	0.554	0.0829458	-1.16184	Down	MGI:1917619	cell differentiation
Bag6	ENSMUSG00000024392	94.159	81.2816	87.7203	0.146801	0.99	0.145333	1.15843	Up	MGI:1919439	cell differentiation
Bahcc1	ENSMUSG00000039741	43.3056	34.332	38.8188	0.231166	0.889	0.205507	1.26138	Up	MGI:2679272
Bahd1	ENSMUSG00000040007	36.6981	30.7001	33.6991	0.177987	0.852	0.151645	1.19537	Up	MGI:2139371
Baiap2	ENSMUSG00000025372	30.5076	25.5556	28.0316	0.176658	0.802	0.14168	1.19377	Up	MGI:2137336	cell differentiation
Baiap2l1	ENSMUSG00000038859	5.01487	4.8667	4.94078	0.0299892	0.401	0.0120257	1.03045	Up	MGI:1914148
Baiap2l2	ENSMUSG00000018126	1.53094	1.55098	1.54096	0.0130049	0.276	0.00358935	-1.01309	Down	MGI:2652819
Baiap3	ENSMUSG00000047507	4.77794	4.46032	4.61913	0.0687619	0.393	0.0270234	1.07121	Up	MGI:2685783
Bambi	ENSMUSG00000024232	5.58202	5.38771	5.48487	0.0354266	0.416	0.0147375	1.03607	Up	MGI:1915260	cell proliferation;cell differentiation
Banf1	ENSMUSG00000024844	85.0334	77.8678	81.4506	0.0879748	0.988	0.0869191	1.09202	Up	MGI:1346330
Bank1	ENSMUSG00000037922	0.947067	0.364139	0.655603	0.889148	0.204	0.181386	2.60084	Up	MGI:2442120
Banp	ENSMUSG00000025316	18.6923	16.1833	17.4378	0.143883	0.665	0.0956821	1.15504	Up	MGI:1889023
Bard1	ENSMUSG00000026196	14.2571	15.4387	14.8479	0.0795803	0.624	0.0496581	-1.08288	Down	MGI:1328361
Barhl2	ENSMUSG00000034384	6.55276	3.5825	5.06763	0.586124	0.405	0.23738	1.8291	Up	MGI:1859314	cell differentiation
Barx1	ENSMUSG00000021381	2.98377	1.85903	2.4214	0.4645	0.321	0.149104	1.60501	Up	MGI:103124	cell differentiation
Barx2	ENSMUSG00000032033	1.3405	1.46991	1.40521	0.0920933	0.269	0.0247731	-1.09654	Down	MGI:109617	cell differentiation
Basp1	ENSMUSG00000045763	67.277	77.926	72.6015	0.146677	0.981	0.143891	-1.15829	Down	MGI:1917600	cell differentiation
Batf	ENSMUSG00000034266	1.49467	0.99031	1.24249	0.405927	0.258	0.104729	1.5093	Up	MGI:1859147	cell differentiation
Batf3	ENSMUSG00000026630	4.70161	2.84483	3.77322	0.492094	0.367	0.180599	1.65269	Up	MGI:1925491	cell differentiation
Bax	ENSMUSG00000003873	57.2266	55.9003	56.5635	0.023448	0.957	0.0224397	1.02373	Up	MGI:99702	cell proliferation;cell differentiation	abnormal male fertility;abnormal spermatogenesis
Baz1a	ENSMUSG00000035021	9.76815	14.3874	12.0778	0.382459	0.571	0.218384	-1.47289	Down	MGI:1309478		abnormal male fertility;abnormal spermatogenesis
Baz1b	ENSMUSG00000002748	46.5765	50.0187	48.2976	0.0712706	0.935	0.066638	-1.0739	Down	MGI:1353499
Baz2a	ENSMUSG00000040054	42.691	40.4079	41.5495	0.054949	0.904	0.0496739	1.0565	Up	MGI:2151152
Baz2b	ENSMUSG00000026987	9.67933	13.8376	11.7585	0.353641	0.565	0.199807	-1.4296	Down	MGI:2442782
BB014433	ENSMUSG00000049008	0.132788	0.103213	0.118	0.250635	0.061	0.0152887	1.28654	Up	MGI:2142823
Bbc3	ENSMUSG00000002083	3.23458	2.77718	3.00588	0.152168	0.343	0.0521938	1.1647	Up	MGI:2181667
Bbox1	ENSMUSG00000041660	0.0495117	0.119008	0.0842598	0.824785	0.034	0.0280427	-2.40363	Down	MGI:1891372
Bbs1	ENSMUSG00000006464	2.9435	3.41996	3.18173	0.149749	0.348	0.0521126	-1.16187	Down	MGI:1277215	cell proliferation;cell differentiation	abnormal male fertility
Bbs10	ENSMUSG00000035759	3.09084	3.31431	3.20257	0.0697782	0.349	0.0243526	-1.0723	Down	MGI:1919019
Bbs12	ENSMUSG00000051444	2.32561	2.69693	2.51127	0.147863	0.325	0.0480556	-1.15967	Down	MGI:2686651	cell differentiation
Bbs2	ENSMUSG00000031755	25.1457	14.7469	19.9463	0.52134	0.704	0.367023	1.70515	Up	MGI:2135267	cell differentiation	abnormal male fertility
Bbs4	ENSMUSG00000025235	13.0557	14.3396	13.6976	0.0937314	0.603	0.05652	-1.09834	Down	MGI:2143311	cell differentiation	abnormal male fertility
Bbs7	ENSMUSG00000037325	5.80401	6.12696	5.96549	0.0541364	0.427	0.0231163	-1.05564	Down	MGI:1918742		abnormal male fertility
Bbs9	ENSMUSG00000035919	16.6813	18.6911	17.6862	0.113637	0.668	0.0759093	-1.12048	Down	MGI:2442833
BC003331	ENSMUSG00000006010	16.73	12.2667	14.4984	0.307849	0.617	0.189943	1.36385	Up	MGI:2385108
BC003965	ENSMUSG00000067722	7.41373	8.75964	8.08668	0.166435	0.48	0.079889	-1.18154	Down	MGI:2670966
BC004004	ENSMUSG00000052712	26.0264	27.7853	26.9059	0.0653724	0.789	0.0515788	-1.06758	Down	MGI:2136782	cell proliferation
BC005537	ENSMUSG00000019132	42.0023	48.9091	45.4557	0.151946	0.922	0.140094	-1.16444	Down	MGI:2441726
BC005624	ENSMUSG00000026851	16.1662	14.6765	15.4214	0.0965998	0.635	0.0613409	1.1015	Up	MGI:2385132
BC017158	ENSMUSG00000030780	12.725	11.2005	11.9627	0.127437	0.569	0.0725118	1.13611	Up	MGI:2384572
BC017643	ENSMUSG00000039294	4.01367	4.06723	4.04045	0.0132559	0.376	0.00498424	-1.01334	Down	MGI:2384959
BC021614	ENSMUSG00000058216	0.597407	0.17282	0.385113	1.1025	0.161	0.177502	3.45682	Up	MGI:2385078
BC021891	ENSMUSG00000031853	30.6246	30.2174	30.421	0.0133855	0.824	0.0110296	1.01348	Up	MGI:2385307
BC022687	ENSMUSG00000037594	17.9493	18.8278	18.3886	0.0477743	0.678	0.032391	-1.04894	Down	MGI:2443738
BC025920	ENSMUSG00000074862	0.839179	1.1029	0.97104	0.271586	0.238	0.0646375	-1.31426	Down	MGI:2670983
BC026585	ENSMUSG00000033488	5.66707	12.7654	9.21623	0.770198	0.506	0.38972	-2.25256	Down	MGI:2448516
BC027072	ENSMUSG00000044375	0.152113	0.0548176	0.103465	0.940367	0.05	0.0470184	2.77489	Up	MGI:2385061	cell differentiation
BC029214	ENSMUSG00000047617	13.2608	11.1956	12.2282	0.168888	0.574	0.0969419	1.18447	Up	MGI:2442831
BC029722	ENSMUSG00000074649	4.22522	3.73089	3.97806	0.124264	0.374	0.0464748	1.1325	Up	MGI:3584273
BC030336	ENSMUSG00000046096	12.8982	13.0132	12.9557	0.0088764	0.588	0.00521932	-1.00892	Down	MGI:2446240
BC030867	ENSMUSG00000034773	26.2869	17.5967	21.9418	0.396057	0.731	0.289518	1.49385	Up	MGI:2387601
BC031181	ENSMUSG00000036299	16.4486	21.8223	19.1354	0.280829	0.691	0.194053	-1.3267	Down	MGI:3039614
BC037034	ENSMUSG00000036948	34.848	28.5173	31.6826	0.199816	0.836	0.167046	1.222	Up	MGI:2385896
BC048403	ENSMUSG00000053684	11.2708	8.54505	9.90792	0.275108	0.524	0.144157	1.31899	Up	MGI:2670984
BC048502	ENSMUSG00000053508	4.45171	5.58517	5.01844	0.225859	0.403	0.0910212	-1.25461	Down	MGI:2652828
BC048507	ENSMUSG00000064063	0.436462	0.467923	0.452192	0.0695744	0.174	0.0121059	-1.07208	Down	MGI:3040680
BC048546	ENSMUSG00000047228	0.840278	0.401398	0.620838	0.706915	0.199	0.140676	2.09338	Up	MGI:3039594
BC048644	ENSMUSG00000074052	9.30908	10.9696	10.1393	0.16377	0.53	0.0867981	-1.17838	Down	MGI:3039566
BC048671	ENSMUSG00000049694	0	0.158987	0.0794935	2	0.03	0.06	0	Down	MGI:2679261
BC049352	ENSMUSG00000091996	0.38839	0.198978	0.293684	0.644952	0.139	0.0896483	1.95192	Up	MGI:3040681
BC049715	ENSMUSG00000047515	0.07371	0.512731	0.29322	1.49724	0.139	0.208116	-6.95606	Down	MGI:3605234
BC049730	ENSMUSG00000045587	0.0692959	1.50948	0.789388	1.82443	0.22	0.401375	-21.7831	Down	MGI:2681843
BC049762	ENSMUSG00000045942	2.749	2.92755	2.83828	0.0629079	0.336	0.0211371	-1.06495	Down	MGI:3039622
BC051142	ENSMUSG00000057246	0.656202	3.04494	1.85057	1.29081	0.294	0.379498	-4.64024	Down	MGI:3039565
BC052040	ENSMUSG00000040282	20.2315	13.0236	16.6275	0.433491	0.652	0.282636	1.55345	Up	MGI:3026886
BC055324	ENSMUSG00000041406	34.5615	42.1939	38.3777	0.198876	0.886	0.176204	-1.22084	Down	MGI:3590554
BC068281	ENSMUSG00000051721	5.65537	5.58246	5.61891	0.0129758	0.419	0.00543687	1.01306	Up	MGI:3040699
BC089491	ENSMUSG00000046750	0.426026	0.641528	0.533777	0.40373	0.187	0.0754976	-1.50584	Down	MGI:3608324
BC089597	ENSMUSG00000074639	0.099947	0.0942385	0.0970928	0.0587943	0.045	0.00264574	1.06058	Up	MGI:3583955
BC100451	ENSMUSG00000076433	17.9462	37.9967	27.9714	0.71682	0.801	0.574173	-2.11726	Down	MGI:1929713
BC100530	ENSMUSG00000071561	0.35635	0	0.178175	2	0.096	0.192	0	Up	MGI:3696883
BC117090	ENSMUSG00000079594	0.414109	0	0.207055	2	0.109	0.218	0	Up	MGI:3696881
Bcam	ENSMUSG00000002980	11.5037	6.14089	8.8223	0.60787	0.497	0.302111	1.8733	Up	MGI:1929940
Bcan	ENSMUSG00000004892	42.9083	36.6198	39.764	0.158145	0.894	0.141382	1.17172	Up	MGI:1096385
Bcap29	ENSMUSG00000020650	17.4396	28.7625	23.1011	0.490147	0.745	0.365159	-1.64926	Down	MGI:101917
Bcap31	ENSMUSG00000002015	47.4296	57.6412	52.5354	0.194376	0.947	0.184074	-1.2153	Down	MGI:1350933
Bcar1	ENSMUSG00000031955	57.5416	44.9102	51.2259	0.246582	0.944	0.232774	1.28126	Up	MGI:108091	cell differentiation
Bcar3	ENSMUSG00000028121	21.6515	19.0012	20.3263	0.130387	0.709	0.0924447	1.13948	Up	MGI:1352501
Bcas1	ENSMUSG00000013523	3.24335	1.92199	2.58267	0.511626	0.327	0.167302	1.6875	Up	MGI:1924210
Bcas2	ENSMUSG00000005687	66.6958	69.7231	68.2095	0.0443824	0.976	0.0433172	-1.04539	Down	MGI:1915433
Bcas3	ENSMUSG00000059439	39.1982	34.033	36.6156	0.141066	0.875	0.123432	1.15177	Up	MGI:2385848
Bcat1	ENSMUSG00000030268	0.308997	0.185981	0.247489	0.497056	0.125	0.0621321	1.66144	Up	MGI:104861
Bcat2	ENSMUSG00000030826	53.2671	60.9616	57.1144	0.134721	0.958	0.129063	-1.14445	Down	MGI:1276534
Bcdin3d	ENSMUSG00000037525	3.31501	2.74832	3.03167	0.186924	0.344	0.0643017	1.2062	Up	MGI:1922534
Bche	ENSMUSG00000027792	0.747968	0.852235	0.800102	0.130317	0.22	0.0286698	-1.1394	Down	MGI:894278	cell proliferation;cell differentiation
Bckdha	ENSMUSG00000060376	43.5703	39.3284	41.4494	0.102339	0.903	0.0924124	1.10786	Up	MGI:107701
Bckdhb	ENSMUSG00000032263	22.1619	24.36	23.261	0.0944974	0.748	0.0706841	-1.09918	Down	MGI:88137
Bckdk	ENSMUSG00000030802	42.4374	34.2784	38.3579	0.212707	0.886	0.188459	1.23802	Up	MGI:1276121
Bcl10	ENSMUSG00000028191	20.9516	22.575	21.7633	0.0745935	0.729	0.0543786	-1.07748	Down	MGI:1337994
Bcl11a	ENSMUSG00000000861	1.17837	0.6545	0.916438	0.571643	0.233	0.133193	1.80042	Up	MGI:106190	cell differentiation
Bcl11b	ENSMUSG00000048251	1.0371	1.15029	1.09369	0.103493	0.248	0.0256663	-1.10914	Down	MGI:1929913	cell proliferation;cell differentiation
Bcl2	ENSMUSG00000057329	0.952077	0.746221	0.849149	0.242426	0.226	0.0547883	1.27586	Up	MGI:88138	cell proliferation;cell differentiation
Bcl2a1d	ENSMUSG00000099974	0.0813325	0.130272	0.105802	0.462556	0.052	0.0240529	-1.60172	Down	MGI:1278325	cell differentiation
Bcl2l1	ENSMUSG00000007659	48.9625	47.482	48.2223	0.0307016	0.934	0.0286753	1.03118	Up	MGI:88139	cell proliferation;cell differentiation	abnormal male fertility
Bcl2l11	ENSMUSG00000027381	9.30369	11.9604	10.632	0.249878	0.539	0.134684	-1.28555	Down	MGI:1197519
Bcl2l12	ENSMUSG00000003190	10.7823	7.88418	9.33326	0.31052	0.51	0.158365	1.36759	Up	MGI:1922986
Bcl2l13	ENSMUSG00000009112	27.9641	23.9986	25.9813	0.152629	0.78	0.11905	1.16524	Up	MGI:2136959
Bcl2l14	ENSMUSG00000030200	0.750889	0.307634	0.529262	0.837497	0.186	0.155774	2.44085	Up	MGI:1914063
Bcl2l15	ENSMUSG00000044165	0.0428243	0.151426	0.0971252	1.11816	0.045	0.0503173	-3.53598	Down	MGI:2685412
Bcl3	ENSMUSG00000053175	8.62276	10.0096	9.31618	0.148864	0.51	0.0759204	-1.16083	Down	MGI:88140	cell differentiation
Bcl6	ENSMUSG00000022508	6.64872	4.29519	5.47195	0.430108	0.415	0.178495	1.54795	Up	MGI:107187	cell proliferation;cell differentiation	abnormal male fertility
Bcl6b	ENSMUSG00000000317	13.3791	5.71455	9.54683	0.802838	0.516	0.414264	2.34123	Up	MGI:1278332	cell proliferation;cell differentiation		Bcl6b
Bcl7a	ENSMUSG00000029438	10.7244	9.57403	10.1492	0.113346	0.53	0.0600732	1.12016	Up	MGI:1924295
Bcl7c	ENSMUSG00000030814	35.0111	27.373	31.1921	0.244873	0.832	0.203735	1.27904	Up	MGI:1332237
Bcl9	ENSMUSG00000038256	30.2967	25.4454	27.8711	0.174062	0.8	0.13925	1.19066	Up	MGI:1924828	cell differentiation
Bcl9l	ENSMUSG00000063382	31.9678	25.1382	28.553	0.23919	0.806	0.192787	1.27168	Up	MGI:1933114	cell differentiation
Bco2	ENSMUSG00000032066	0.0982025	0.147612	0.122907	0.402006	0.065	0.0261304	-1.50314	Down	MGI:2177469
Bcor	ENSMUSG00000040363	9.54618	6.22866	7.88742	0.420609	0.476	0.20021	1.53262	Up	MGI:1918708
Bcorl1	ENSMUSG00000036959	26.7564	19.9596	23.358	0.290984	0.749	0.217947	1.34053	Up	MGI:2443910
Bcr	ENSMUSG00000009681	45.8432	32.5858	39.2145	0.338074	0.891	0.301224	1.40685	Up	MGI:88141
Bcs1l	ENSMUSG00000026172	13.8433	11.5828	12.713	0.177809	0.583	0.103663	1.19516	Up	MGI:1914071
Bdh1	ENSMUSG00000046598	8.74295	7.23216	7.98756	0.189143	0.478	0.0904103	1.2089	Up	MGI:1919161
Bdh2	ENSMUSG00000028167	0.661457	0.210659	0.436058	1.0338	0.171	0.17678	3.13994	Up	MGI:1917022	cell differentiation
Bdkrb2	ENSMUSG00000021070	1.27854	0.654955	0.966747	0.645034	0.237	0.152873	1.9521	Up	MGI:102845	cell proliferation
Bean1	ENSMUSG00000031872	0.961086	0.664344	0.812715	0.365124	0.222	0.0810576	1.44667	Up	MGI:1929597
Becn1	ENSMUSG00000035086	73.6102	79.8069	76.7086	0.0807824	0.984	0.0794899	-1.08418	Down	MGI:1891828	cell proliferation;cell differentiation
Begain	ENSMUSG00000040867	7.16305	5.09809	6.13057	0.33683	0.432	0.145511	1.40505	Up	MGI:3044626
Bend3	ENSMUSG00000038214	6.12305	4.85174	5.4874	0.231677	0.416	0.0963776	1.26203	Up	MGI:2677212
Bend4	ENSMUSG00000092060	23.1408	31.7385	27.4397	0.313331	0.795	0.249098	-1.37154	Down	MGI:3648414
Bend5	ENSMUSG00000028545	11.023	7.25655	9.13978	0.412094	0.505	0.208108	1.51904	Up	MGI:1914871
Bend6	ENSMUSG00000042182	2.73966	2.63516	2.68741	0.038885	0.331	0.0128709	1.03966	Up	MGI:2444572	cell differentiation
Bend7	ENSMUSG00000048186	5.75742	2.67005	4.21373	0.732692	0.382	0.279888	2.1563	Up	MGI:2443100
Best1	ENSMUSG00000037418	2.60487	1.70032	2.15259	0.420214	0.309	0.129846	1.53199	Up	MGI:1346332		abnormal male fertility
Best2	ENSMUSG00000052819	0.132158	0.259658	0.195908	0.650816	0.105	0.0683356	-1.96475	Down	MGI:2387588
Best3	ENSMUSG00000020169	0.240886	0.196695	0.21879	0.201979	0.114	0.0230256	1.22467	Up	MGI:3580298
Bet1	ENSMUSG00000032757	19.9497	27.1127	23.5312	0.304404	0.751	0.228608	-1.35905	Down	MGI:1343104
Bet1l	ENSMUSG00000025484	13.3173	15.2191	14.2682	0.133289	0.613	0.0817064	-1.14281	Down	MGI:1913128
Bex1	ENSMUSG00000050071	36.626	33.5651	35.0956	0.0872162	0.865	0.075442	1.09119	Up	MGI:1328321	cell proliferation;cell differentiation
Bex2	ENSMUSG00000042750	55.1643	59.0372	57.1007	0.0678257	0.958	0.064977	-1.07021	Down	MGI:1338017
Bex4	ENSMUSG00000047844	27.4702	28.6876	28.0789	0.0433564	0.802	0.0347718	-1.04432	Down	MGI:3606746	cell proliferation
Bfsp1	ENSMUSG00000027420	3.12849	1.93837	2.53343	0.469766	0.325	0.152674	1.61398	Up	MGI:101770	cell differentiation
Bglap	ENSMUSG00000074483	0.304738	0.727024	0.515881	0.818573	0.184	0.150617	-2.38573	Down	MGI:88156
Bglap2	ENSMUSG00000074486	0.32029	0.142393	0.231342	0.76898	0.118	0.0907396	2.24934	Up	MGI:88157	cell proliferation
Bgn	ENSMUSG00000031375	5.10903	2.21682	3.66292	0.78959	0.364	0.287411	2.30467	Up	MGI:88158
Bhlha15	ENSMUSG00000052271	0.160261	0.111102	0.135682	0.362312	0.073	0.0264488	1.44247	Up	MGI:891976	cell differentiation
Bhlha9	ENSMUSG00000044243	0.150407	0	0.0752035	2	0.026	0.052	0	Up	MGI:2444198
Bhlhe22	ENSMUSG00000025128	0.624963	0.749618	0.687291	0.181372	0.208	0.0377253	-1.19946	Down	MGI:1930001	cell differentiation
Bhlhe40	ENSMUSG00000030103	8.53876	5.6125	7.07563	0.413569	0.457	0.189001	1.52138	Up	MGI:1097714
Bhlhe41	ENSMUSG00000030256	7.51175	7.28346	7.39761	0.03086	0.465	0.0143499	1.03134	Up	MGI:1930704	cell differentiation
Bhmt	ENSMUSG00000074768	0.531156	0.191451	0.361303	0.940221	0.156	0.146674	2.77437	Up	MGI:1339972
Bhmt2	ENSMUSG00000042118	0.2432	0.241004	0.242102	0.00907056	0.123	0.00111568	1.00911	Up	MGI:1891379
Bicc1	ENSMUSG00000014329	5.98818	3.31425	4.65121	0.574891	0.393	0.225932	1.8068	Up	MGI:1933388
Bicd1	ENSMUSG00000003452	1.89215	1.56602	1.72908	0.188614	0.286	0.0539437	1.20825	Up	MGI:1101760
Bid	ENSMUSG00000004446	23.9403	21.6632	22.8017	0.0998651	0.742	0.0740999	1.10511	Up	MGI:108093	cell proliferation
Bik	ENSMUSG00000016758	10.2548	10.5902	10.4225	0.0321804	0.535	0.0172165	-1.03271	Down	MGI:1206591
Bin1	ENSMUSG00000024381	19.4043	10.6341	15.0192	0.583933	0.628	0.36671	1.82472	Up	MGI:108092	cell differentiation
Bin3	ENSMUSG00000022089	2.8731	3.06606	2.96958	0.0649789	0.341	0.0221578	-1.06716	Down	MGI:1929883	cell differentiation
Birc2	ENSMUSG00000057367	26.647	38.5157	32.5814	0.364279	0.844	0.307451	-1.4454	Down	MGI:1197009
Birc3	ENSMUSG00000032000	3.4513	3.20678	3.32904	0.0734506	0.354	0.0260015	1.07625	Up	MGI:1197007
Birc5	ENSMUSG00000017716	35.5157	31.256	33.3859	0.12759	0.85	0.108451	1.13628	Up	MGI:1203517	cell proliferation
Birc6	ENSMUSG00000024073	21.3817	20.6885	21.0351	0.0329544	0.719	0.0236942	1.03351	Up	MGI:1276108	cell proliferation
Bivm	ENSMUSG00000041684	14.7109	14.0446	14.3778	0.0463424	0.615	0.0285006	1.04744	Up	MGI:2179809
Blcap	ENSMUSG00000067787	9.14083	15.21	12.1754	0.498477	0.573	0.285628	-1.66396	Down	MGI:1858907
Blk	ENSMUSG00000014453	0.241583	0.0235262	0.132555	1.64503	0.071	0.116797	10.2687	Up	MGI:88169	cell proliferation;cell differentiation
Blm	ENSMUSG00000030528	12.265	12.4114	12.3382	0.0118656	0.576	0.00683456	-1.01194	Down	MGI:1328362	cell proliferation;cell differentiation
Blmh	ENSMUSG00000020840	45.7666	50.6961	48.2313	0.102205	0.934	0.0954598	-1.10771	Down	MGI:1345186
Blnk	ENSMUSG00000061132	2.18816	1.58813	1.88814	0.317788	0.296	0.0940653	1.37782	Up	MGI:96878
Bloc1s1	ENSMUSG00000090247	24.8305	22.6267	23.7286	0.0928753	0.753	0.0699351	1.0974	Up	MGI:1195276	cell differentiation
Bloc1s2	ENSMUSG00000057506	16.8419	20.2091	18.5255	0.18176	0.68	0.123597	-1.19993	Down	MGI:1920939	cell proliferation;cell differentiation
Bloc1s3	ENSMUSG00000057667	5.9198	4.27307	5.09643	0.323114	0.406	0.131184	1.38537	Up	MGI:2678952	cell differentiation
Blvra	ENSMUSG00000001999	5.19848	13.0141	9.1063	0.858267	0.504	0.432567	-2.50345	Down	MGI:88170
Blvrb	ENSMUSG00000040466	8.67186	5.35252	7.01219	0.473367	0.455	0.215382	1.62015	Up	MGI:2385271
Blzf1	ENSMUSG00000026577	8.00752	9.32329	8.6654	0.151842	0.493	0.074858	-1.16432	Down	MGI:1201607
Bmf	ENSMUSG00000040093	11.2542	11.3151	11.2846	0.00539671	0.555	0.00299517	-1.00541	Down	MGI:2176433
Bmi1	ENSMUSG00000026739	17.039	25.2217	21.1303	0.387249	0.721	0.279206	-1.48023	Down	MGI:88174	cell proliferation;cell differentiation
Bmp1	ENSMUSG00000022098	14.5175	9.42867	11.9731	0.425022	0.569	0.241838	1.53972	Up	MGI:88176	cell differentiation
Bmp2	ENSMUSG00000027358	0.460528	0.204074	0.332301	0.771752	0.15	0.115763	2.25667	Up	MGI:88177	cell proliferation;cell differentiation
Bmp2k	ENSMUSG00000034663	15.8584	21.061	18.4597	0.281836	0.679	0.191366	-1.32807	Down	MGI:2155456
Bmp3	ENSMUSG00000029335	0.116833	0.109752	0.113293	0.0625019	0.058	0.00362511	1.06452	Up	MGI:88179	cell differentiation
Bmp4	ENSMUSG00000021835	2.39936	1.17105	1.7852	0.68805	0.29	0.199534	2.0489	Up	MGI:88180	cell proliferation;cell differentiation
Bmp5	ENSMUSG00000032179	0.172787	0	0.0863935	2	0.036	0.072	0	Up	MGI:88181	cell proliferation;cell differentiation
Bmp6	ENSMUSG00000039004	5.97799	4.55125	5.26462	0.271005	0.409	0.110841	1.31348	Up	MGI:88182	cell proliferation;cell differentiation
Bmp7	ENSMUSG00000008999	14.1247	11.4531	12.7889	0.2089	0.585	0.122206	1.23326	Up	MGI:103302	cell proliferation;cell differentiation
Bmp8a	ENSMUSG00000032726	0.910385	0.529959	0.720172	0.528243	0.211	0.111459	1.71784	Up	MGI:104515	cell differentiation	abnormal male fertility;abnormal spermatogenesis
Bmper	ENSMUSG00000031963	1.61942	1.09901	1.35922	0.382875	0.266	0.101845	1.47353	Up	MGI:1920480	cell proliferation
Bmpr1a	ENSMUSG00000021796	23.9068	31.6624	27.7846	0.279133	0.799	0.223027	-1.32441	Down	MGI:1338938	cell proliferation;cell differentiation
Bmpr1b	ENSMUSG00000052430	0.802293	0.572808	0.68755	0.333772	0.208	0.0694245	1.40063	Up	MGI:107191	cell differentiation
Bmpr2	ENSMUSG00000067336	10.364	14.4583	12.4111	0.329889	0.577	0.190346	-1.39505	Down	MGI:1095407	cell proliferation;cell differentiation
Bms1	ENSMUSG00000030138	41.8734	41.5119	41.6927	0.00867059	0.905	0.00784689	1.00871	Up	MGI:2446132
Bmyc	ENSMUSG00000049086	23.7734	20.0582	21.9158	0.169522	0.731	0.12392	1.18522	Up	MGI:88184
Bnc1	ENSMUSG00000025105	21.4004	18.2014	19.8009	0.161558	0.702	0.113414	1.17576	Up	MGI:1097164	cell proliferation;cell differentiation
Bnc2	ENSMUSG00000028487	29.0051	18.6613	23.8332	0.434008	0.754	0.327242	1.55429	Up	MGI:2443805
Bnip2	ENSMUSG00000011958	42.3115	48.9738	45.6427	0.145967	0.923	0.134727	-1.15746	Down	MGI:109327	cell differentiation
Bnip3	ENSMUSG00000078566	21.5019	27.3176	24.4097	0.238253	0.763	0.181787	-1.27047	Down	MGI:109326	cell differentiation
Bnipl	ENSMUSG00000028115	0.244953	0.181566	0.213259	0.297229	0.111	0.0329925	1.34911	Up	MGI:2384749	cell proliferation
Bod1	ENSMUSG00000044502	42.7567	54.1782	48.4674	0.235653	0.935	0.220336	-1.26713	Down	MGI:1916806
Bod1l	ENSMUSG00000061755	8.72767	12.2332	10.4804	0.334483	0.536	0.179283	-1.40166	Down	MGI:2444804
Bok	ENSMUSG00000026278	33.7176	28.7386	31.2281	0.15944	0.832	0.132654	1.17325	Up	MGI:1858494	cell proliferation
Bola1	ENSMUSG00000015943	7.85087	8.0622	7.95654	0.0265606	0.477	0.0126694	-1.02692	Down	MGI:1916418
Bola2	ENSMUSG00000047721	19.6792	18.5617	19.1204	0.0584453	0.691	0.0403857	1.0602	Up	MGI:1913412
Bola3	ENSMUSG00000045160	4.13846	3.70848	3.92347	0.109592	0.372	0.0407681	1.11595	Up	MGI:1925903
Boll	ENSMUSG00000025977	9.13027	11.994	10.5621	0.271132	0.537	0.145598	-1.31365	Down	MGI:1922638	cell differentiation	abnormal male fertility;abnormal spermatogenesis
Bop1	ENSMUSG00000022557	53.5062	44.5172	49.0117	0.183405	0.936	0.171667	1.20192	Up	MGI:1334460	cell proliferation
Bpgm	ENSMUSG00000038871	14.963	16.7579	15.8605	0.113168	0.641	0.0725409	-1.11996	Down	MGI:1098242	cell differentiation
Bphl	ENSMUSG00000038286	9.07045	8.85833	8.96439	0.0236625	0.501	0.0118549	1.02395	Up	MGI:1915271
Bpi	ENSMUSG00000052922	0.127682	0.048499	0.0880905	0.898882	0.037	0.0332586	2.63267	Up	MGI:3045315
Bpifa3	ENSMUSG00000027482	0	0.702992	0.351496	2	0.153	0.306	0	Down	MGI:1920638
Bpifb1	ENSMUSG00000027485	0.169155	0.0966518	0.132903	0.545533	0.071	0.0387328	1.75015	Up	MGI:2137431
Bpifb2	ENSMUSG00000027481	0.0715564	0.0674695	0.069513	0.0587934	0.02	0.00117587	1.06057	Up	MGI:1913807
Bpifb4	ENSMUSG00000074665	0.345049	0.473794	0.409421	0.314456	0.166	0.0521997	-1.37312	Down	MGI:2685852
Bpifb5	ENSMUSG00000038572	0.360862	0.313103	0.336983	0.141725	0.151	0.0214005	1.15253	Up	MGI:2385160
Bpifc	ENSMUSG00000050108	1.26293	1.29819	1.28056	0.0275348	0.26	0.00715906	-1.02792	Down	MGI:3026884
Bpnt1	ENSMUSG00000026617	24.3975	11.5566	17.977	0.714294	0.673	0.48072	2.11113	Up	MGI:1338800
Bptf	ENSMUSG00000040481	15.7124	18.3295	17.0209	0.153757	0.659	0.101326	-1.16656	Down	MGI:2444008
Braf	ENSMUSG00000002413	10.1977	9.26763	9.73267	0.0955617	0.519	0.0495965	1.10036	Up	MGI:88190	cell proliferation;cell differentiation
Brap	ENSMUSG00000029458	32.9915	35.5656	34.2786	0.0750936	0.857	0.0643552	-1.07802	Down	MGI:1919649
Brca1	ENSMUSG00000017146	16.2086	18.9368	17.5727	0.155252	0.667	0.103553	-1.16832	Down	MGI:104537	cell proliferation	abnormal male fertility
Brca2	ENSMUSG00000041147	11.7138	14.719	13.2164	0.227382	0.593	0.134837	-1.25655	Down	MGI:109337	cell proliferation;cell differentiation	abnormal male fertility
Brd1	ENSMUSG00000022387	42.8304	36.0942	39.4623	0.1707	0.893	0.152435	1.18663	Up	MGI:1924161
Brd2	ENSMUSG00000024335	84.4572	89.4286	86.9429	0.0571801	0.99	0.0566083	-1.05886	Down	MGI:99495
Brd3	ENSMUSG00000026918	50.3077	43.1768	46.7422	0.152558	0.929	0.141726	1.16516	Up	MGI:1914632
Brd7	ENSMUSG00000031660	39.2762	44.5856	41.9309	0.126623	0.906	0.11472	-1.13518	Down	MGI:1349766	cell proliferation
Brd8	ENSMUSG00000003778	30.3911	29.0731	29.7321	0.0443292	0.818	0.0362613	1.04533	Up	MGI:1925906
Brd9	ENSMUSG00000057649	29.308	34.3227	31.8153	0.157619	0.837	0.131927	-1.1711	Down	MGI:2145317
Bre	ENSMUSG00000052139	19.2192	16.352	17.7856	0.161209	0.67	0.10801	1.17534	Up	MGI:1333875
Brf1	ENSMUSG00000011158	35.1306	35.5705	35.3505	0.0124439	0.867	0.0107889	-1.01252	Down	MGI:1919558
Bri3	ENSMUSG00000047843	25.473	29.4651	27.469	0.145331	0.796	0.115683	-1.15672	Down	MGI:1933174
Bri3bp	ENSMUSG00000037905	27.6098	26.3054	26.9576	0.0483871	0.79	0.0382258	1.04959	Up	MGI:1924059
Brip1	ENSMUSG00000034329	15.0886	10.5502	12.8194	0.354026	0.585	0.207105	1.43017	Up	MGI:2442836	cell proliferation;cell differentiation
Brix1	ENSMUSG00000022247	30.3106	36.0199	33.1653	0.172147	0.848	0.145981	-1.18836	Down	MGI:1915082
Brms1	ENSMUSG00000080268	34.8814	31.5155	33.1985	0.101387	0.849	0.0860778	1.1068	Up	MGI:2388804
Brms1l	ENSMUSG00000012076	13.1155	16.8261	14.9708	0.247856	0.627	0.155406	-1.28292	Down	MGI:1196337
Brpf1	ENSMUSG00000001632	15.1887	14.8985	15.0436	0.0192947	0.628	0.0121171	1.01948	Up	MGI:1926033
Brpf3	ENSMUSG00000063952	41.1924	34.8032	37.9978	0.168147	0.884	0.148642	1.18358	Up	MGI:2146836
Brsk1	ENSMUSG00000035390	7.0338	6.23161	6.6327	0.120945	0.445	0.0538204	1.12873	Up	MGI:2685946	cell differentiation
Brsk2	ENSMUSG00000053046	22.0853	23.204	22.6446	0.0494024	0.74	0.0365578	-1.05065	Down	MGI:1923020	cell differentiation
Brwd1	ENSMUSG00000022914	26.6474	32.8421	29.7448	0.208262	0.818	0.170358	-1.23247	Down	MGI:1890651		abnormal male fertility
Brwd3	ENSMUSG00000063663	8.21652	9.60011	8.90831	0.155314	0.499	0.0775019	-1.16839	Down	MGI:3029414
Bscl2	ENSMUSG00000071657	8.14631	8.05449	8.1004	0.0113352	0.481	0.00545225	1.0114	Up	MGI:1298392	cell differentiation	abnormal male fertility;abnormal spermatogenesis
Bsdc1	ENSMUSG00000040859	29.9624	25.8623	27.9123	0.146892	0.801	0.11766	1.15854	Up	MGI:1913466
Bsg	ENSMUSG00000023175	88.2105	91.1464	89.6784	0.0327381	0.991	0.0324434	-1.03328	Down	MGI:88208		abnormal male fertility;abnormal spermatogenesis
Bsn	ENSMUSG00000032589	1.10466	0.796894	0.950777	0.323699	0.235	0.0760694	1.38621	Up	MGI:1277955
Bsnd	ENSMUSG00000025418	0.126347	0	0.0631735	2	0.012	0.024	0	Up	MGI:2153465
Bspry	ENSMUSG00000028392	4.49936	3.86976	4.18456	0.150458	0.38	0.057174	1.1627	Up	MGI:2177191
Bst1	ENSMUSG00000029082	0.165505	0.121492	0.143499	0.306714	0.078	0.0239237	1.36227	Up	MGI:105370	cell proliferation
Bst2	ENSMUSG00000046718	20.5465	16.2162	18.3814	0.235581	0.678	0.159724	1.26704	Up	MGI:1916800
Bsx	ENSMUSG00000054360	0	0.141237	0.0706185	2	0.021	0.042	0	Down	MGI:2669849
Btaf1	ENSMUSG00000040565	18.7005	23.858	21.2793	0.242372	0.723	0.175235	-1.27579	Down	MGI:2147538
Btbd1	ENSMUSG00000025103	17.292	27.2011	22.2465	0.445422	0.735	0.327385	-1.57305	Down	MGI:1933765	cell differentiation
Btbd10	ENSMUSG00000038187	38.1917	49.1971	43.6944	0.251872	0.914	0.230211	-1.28816	Down	MGI:1916065	cell proliferation
Btbd11	ENSMUSG00000020042	2.79486	2.05482	2.42484	0.305191	0.321	0.0979664	1.36015	Up	MGI:1921257
Btbd16	ENSMUSG00000040298	0.45338	0.329992	0.391686	0.315018	0.162	0.0510329	1.37391	Up	MGI:3045247
Btbd17	ENSMUSG00000000202	0.340124	0.0744262	0.207275	1.28186	0.109	0.139723	4.56995	Up	MGI:1919264
Btbd19	ENSMUSG00000073771	1.83396	0.807937	1.32095	0.776732	0.263	0.204281	2.26993	Up	MGI:1925861
Btbd2	ENSMUSG00000003344	14.1165	13.8548	13.9857	0.0187108	0.608	0.0113762	1.01889	Up	MGI:1933831	cell differentiation
Btbd3	ENSMUSG00000062098	15.6324	14.591	15.1117	0.0689135	0.629	0.0433466	1.07137	Up	MGI:2385155	cell differentiation
Btbd6	ENSMUSG00000002803	14.5821	12.3579	13.47	0.165122	0.598	0.0987433	1.17998	Up	MGI:3026623	cell differentiation
Btbd7	ENSMUSG00000041702	21.7267	25.4102	23.5684	0.156289	0.751	0.117373	-1.16954	Down	MGI:1917858
Btbd9	ENSMUSG00000062202	18.919	30.0933	24.5061	0.45598	0.764	0.348369	-1.59064	Down	MGI:1916625
Btc	ENSMUSG00000082361	0.669587	0.425265	0.547426	0.446311	0.189	0.0843527	1.57452	Up	MGI:99439	cell proliferation;cell differentiation
Btd	ENSMUSG00000021900	11.7596	9.0076	10.3836	0.265033	0.534	0.141528	1.30552	Up	MGI:1347001
Btf3	ENSMUSG00000021660	17.2785	20.4631	18.8708	0.168758	0.686	0.115768	-1.18431	Down	MGI:1202875
Btf3l4	ENSMUSG00000028568	17.6433	19.7376	18.6904	0.112052	0.683	0.0765314	-1.1187	Down	MGI:1915312
Btg1	ENSMUSG00000036478	8.87787	11.008	9.94293	0.214236	0.525	0.112474	-1.23994	Down	MGI:88215	cell proliferation;cell differentiation
Btg2	ENSMUSG00000020423	17.9213	21.022	19.4716	0.159242	0.696	0.110832	-1.17302	Down	MGI:108384	cell proliferation;cell differentiation
Btg3	ENSMUSG00000022863	10.5647	13.122	11.8434	0.215927	0.567	0.122431	-1.24206	Down	MGI:109532
Btg4	ENSMUSG00000032056	0.127494	0.0748697	0.101182	0.520096	0.049	0.0254847	1.70288	Up	MGI:1860140	cell proliferation
Btk	ENSMUSG00000031264	0.326052	0.301531	0.313792	0.0781442	0.145	0.0113309	1.08132	Up	MGI:88216	cell proliferation;cell differentiation
Btn1a1	ENSMUSG00000000706	0.0811972	0.14705	0.114124	0.577031	0.058	0.0334678	-1.81102	Down	MGI:103118	cell proliferation
Btn2a2	ENSMUSG00000053216	0.350183	0.79741	0.573797	0.779417	0.193	0.150428	-2.27712	Down	MGI:3606486	cell proliferation;cell differentiation
Btnl2	ENSMUSG00000024340	0.210193	0.100714	0.155453	0.704256	0.085	0.0598617	2.08703	Up	MGI:1859549	cell proliferation
Btnl9	ENSMUSG00000040283	0.190024	0.143675	0.166849	0.277789	0.092	0.0255566	1.3226	Up	MGI:2442439
Btrc	ENSMUSG00000025217	17.2295	19.6212	18.4254	0.129805	0.679	0.0881375	-1.13881	Down	MGI:1338871	cell proliferation	abnormal male fertility
Bub1	ENSMUSG00000027379	25.1238	36.3607	30.7422	0.36552	0.828	0.30265	-1.44726	Down	MGI:1100510		abnormal male fertility;abnormal spermatogenesis
Bub1b	ENSMUSG00000040084	41.5246	36.7793	39.1519	0.121202	0.891	0.107991	1.12902	Up	MGI:1333889		abnormal male fertility
Bub3	ENSMUSG00000066979	72.0993	61.7371	66.9182	0.154849	0.974	0.150823	1.16784	Up	MGI:1343463
Bud13	ENSMUSG00000032077	25.7198	18.625	22.1724	0.319983	0.734	0.234868	1.38093	Up	MGI:2443443
Bud31	ENSMUSG00000038722	39.6269	33.2496	36.4382	0.175017	0.874	0.152965	1.1918	Up	MGI:2141291
Bves	ENSMUSG00000071317	5.41144	4.70747	5.05945	0.139139	0.404	0.0562124	1.14954	Up	MGI:1346013	cell differentiation
Bzrap1	ENSMUSG00000034156	1.93387	1.22468	1.57927	0.44906	0.279	0.125288	1.57908	Up	MGI:2450877
Bzw1	ENSMUSG00000051223	20.7351	27.256	23.9956	0.271756	0.757	0.205719	-1.31449	Down	MGI:1914132
Bzw2	ENSMUSG00000020547	14.855	12.6735	13.7643	0.15849	0.604	0.0957281	1.17213	Up	MGI:1914162	cell differentiation
C130026I21Rik	ENSMUSG00000052477	0.109696	0.0694391	0.0895675	0.449459	0.038	0.0170794	1.57974	Up	MGI:3612702
C130050O18Rik	ENSMUSG00000044092	0.418473	0.351273	0.384873	0.174603	0.161	0.0281111	1.1913	Up	MGI:2442694
C130060K24Rik	ENSMUSG00000029917	0.0399788	0.0753908	0.0576848	0.613888	0.007	0.00429722	-1.88577	Down	MGI:2441881
C130074G19Rik	ENSMUSG00000039349	3.12424	3.9607	3.54247	0.236123	0.36	0.0850044	-1.26773	Down	MGI:2444831
C1d	ENSMUSG00000000581	6.17138	11.2441	8.70774	0.582553	0.494	0.287781	-1.82197	Down	MGI:1927354
C1galt1	ENSMUSG00000042460	9.81495	12.2457	11.0303	0.22037	0.548	0.120763	-1.24766	Down	MGI:2151071	cell differentiation
C1qa	ENSMUSG00000036887	5.04134	1.85564	3.44849	0.923796	0.357	0.329795	2.71677	Up	MGI:88223
C1qb	ENSMUSG00000036905	5.65767	1.95619	3.80693	0.972301	0.369	0.358779	2.89219	Up	MGI:88224
C1qc	ENSMUSG00000036896	4.75087	1.95749	3.35418	0.832806	0.355	0.295646	2.42702	Up	MGI:88225	cell differentiation
C1ql1	ENSMUSG00000045532	27.8661	18.4873	23.1767	0.404665	0.746	0.30188	1.50731	Up	MGI:1344400	cell differentiation
C1ql2	ENSMUSG00000036907	0.12285	0.0579169	0.0903835	0.718418	0.039	0.0280183	2.12114	Up	MGI:3032521
C1ql3	ENSMUSG00000049630	0.1533	0.15549	0.154395	0.0141844	0.084	0.00119149	-1.01429	Down	MGI:2387350
C1ql4	ENSMUSG00000001076	0.283284	0.109659	0.196471	0.883716	0.105	0.0927902	2.58332	Up	MGI:3579909	cell proliferation;cell differentiation
C1qtnf1	ENSMUSG00000017446	1.31902	1.01404	1.16653	0.261442	0.253	0.0661448	1.30076	Up	MGI:1919254
C1qtnf2	ENSMUSG00000046491	0.405672	0.179727	0.2927	0.771935	0.139	0.107299	2.25716	Up	MGI:1916433
C1qtnf3	ENSMUSG00000058914	2.30014	1.82379	2.06196	0.231018	0.304	0.0702293	1.26119	Up	MGI:1932136
C1qtnf4	ENSMUSG00000040794	9.97703	7.50011	8.73857	0.283447	0.495	0.140306	1.33025	Up	MGI:1914695
C1qtnf6	ENSMUSG00000022440	14.4041	15.721	15.0625	0.0874288	0.629	0.0549927	-1.09143	Down	MGI:1919959
C1qtnf7	ENSMUSG00000061535	0.724655	0.14514	0.434898	1.33253	0.171	0.227863	4.9928	Up	MGI:1925911
C1qtnf9	ENSMUSG00000071347	0.434893	0.517884	0.476388	0.174209	0.178	0.0310091	-1.19083	Down	MGI:3045252
C1rl	ENSMUSG00000038527	0.406714	0.234777	0.320746	0.536054	0.147	0.0788	1.73234	Up	MGI:2660692
C2cd2	ENSMUSG00000045975	3.69236	2.21907	2.95571	0.498455	0.341	0.169973	1.66392	Up	MGI:1891883
C2cd3	ENSMUSG00000047248	14.683	10.6308	12.6569	0.320157	0.581	0.186011	1.38118	Up	MGI:2142166
C2cd4a	ENSMUSG00000047990	0.592509	0.421821	0.507165	0.336553	0.182	0.0612527	1.40465	Up	MGI:3645763
C2cd4b	ENSMUSG00000091956	0.107281	0.145006	0.126144	0.299063	0.067	0.0200372	-1.35164	Down	MGI:1922947
C2cd4c	ENSMUSG00000045912	1.39117	1.67613	1.53365	0.185805	0.276	0.0512822	-1.20483	Down	MGI:2685084
C2cd4d	ENSMUSG00000091648	2.25391	1.97238	2.11314	0.133228	0.307	0.040901	1.14274	Up	MGI:2685505
C3	ENSMUSG00000024164	2.15622	1.51893	1.83757	0.34681	0.293	0.101615	1.41957	Up	MGI:88227
C330007P06Rik	ENSMUSG00000006423	9.86631	12.3408	11.1036	0.222856	0.55	0.122571	-1.2508	Down	MGI:1924894
C330021F23Rik	ENSMUSG00000065952	7.09126	7.76143	7.42634	0.0902422	0.466	0.0420529	-1.09451	Down	MGI:3612471
C330027C09Rik	ENSMUSG00000033031	20.4342	28.4044	24.4193	0.326389	0.764	0.249361	-1.39004	Down	MGI:2146335	cell proliferation	abnormal spermatogenesis
C3ar1	ENSMUSG00000040552	0.261683	0.207797	0.23474	0.229556	0.12	0.0275467	1.25932	Up	MGI:1097680	cell proliferation
C530008M17Rik	ENSMUSG00000036377	11.4822	5.73857	8.61039	0.667058	0.492	0.328193	2.00088	Up	MGI:2444817
C77080	ENSMUSG00000050390	10.3162	6.27937	8.29779	0.486495	0.485	0.23595	1.64287	Up	MGI:2140651	cell differentiation
C77370	ENSMUSG00000046449	3.68964	5.40876	4.5492	0.377896	0.391	0.147757	-1.46593	Down	MGI:2148050	cell differentiation
C87436	ENSMUSG00000046679	10.6191	8.03888	9.32899	0.276581	0.51	0.141056	1.32097	Up	MGI:2141787
C8b	ENSMUSG00000029656	5.29647	3.34656	4.32151	0.45121	0.385	0.173716	1.58266	Up	MGI:88236
C8g	ENSMUSG00000015083	4.29442	4.97047	4.63244	0.145938	0.393	0.0573537	-1.15743	Down	MGI:88237
Cab39	ENSMUSG00000036707	33.307	36.762	35.0345	0.0986171	0.864	0.0852052	-1.10373	Down	MGI:107438
Cab39l	ENSMUSG00000021981	23.0966	25.9692	24.5329	0.117092	0.765	0.0895752	-1.12437	Down	MGI:1914081
Cabin1	ENSMUSG00000020196	71.2251	63.3906	67.3079	0.116398	0.975	0.113488	1.12359	Up	MGI:1298375
Cables1	ENSMUSG00000040957	15.6565	11.8256	13.741	0.278792	0.603	0.168112	1.32395	Up	MGI:1927065
Cables2	ENSMUSG00000038990	22.3728	23.2283	22.8006	0.037521	0.742	0.0278406	-1.03824	Down	MGI:2182335
Cabp1	ENSMUSG00000029544	10.109	12.6694	11.3892	0.224809	0.557	0.125219	-1.25328	Down	MGI:1352750
Cabp2	ENSMUSG00000097733	0.442982	0	0.221491	2	0.115	0.23	0	Up
Cabp4	ENSMUSG00000097687	0.0565188	0.0894961	0.0730075	0.451698	0.023	0.010389	-1.58347	Down
Cabp7	ENSMUSG00000009075	0.324695	0.182257	0.253476	0.561939	0.127	0.0713662	1.78152	Up	MGI:2183437
Cabyr	ENSMUSG00000024430	3.04153	2.64071	2.84112	0.141078	0.337	0.0475433	1.15178	Up	MGI:1918382	cell differentiation
Cachd1	ENSMUSG00000028532	3.3633	2.01508	2.68919	0.501348	0.331	0.165946	1.66907	Up	MGI:2444177
Cacna1a	ENSMUSG00000034656	4.2083	2.31983	3.26407	0.578564	0.352	0.203654	1.81406	Up	MGI:109482	cell differentiation	abnormal male fertility
Cacna1b	ENSMUSG00000004113	6.30021	5.17244	5.73632	0.196601	0.422	0.0829658	1.21803	Up	MGI:88296
Cacna1e	ENSMUSG00000004110	0.0866311	0.0631797	0.0749054	0.31308	0.025	0.00782701	1.37119	Up	MGI:106217
Cacna1g	ENSMUSG00000020866	2.28843	0.326477	1.30745	1.50059	0.262	0.393155	7.00947	Up	MGI:1201678
Cacna1h	ENSMUSG00000024112	34.9935	26.9391	30.9663	0.260102	0.83	0.215885	1.29899	Up	MGI:1928842
Cacna1i	ENSMUSG00000022416	0.692418	0.596429	0.644424	0.148953	0.202	0.0300886	1.16094	Up	MGI:2178051
Cacna1s	ENSMUSG00000026407	0.461971	0.189634	0.325802	0.835896	0.148	0.123713	2.43612	Up	MGI:88294	cell differentiation
Cacna2d1	ENSMUSG00000040118	5.11801	3.99671	4.55736	0.246042	0.391	0.0962023	1.28056	Up	MGI:88295
Cacna2d2	ENSMUSG00000010066	1.74436	1.21669	1.48052	0.356405	0.272	0.096942	1.43369	Up	MGI:1929813	cell differentiation	abnormal male fertility
Cacna2d3	ENSMUSG00000021991	1.77714	3.42496	2.60105	0.633521	0.328	0.207795	-1.92723	Down	MGI:1338890
Cacnb1	ENSMUSG00000020882	1.73029	9.5573	5.64379	1.38683	0.42	0.582471	-5.52352	Down	MGI:102522
Cacnb2	ENSMUSG00000057914	2.2773	1.36382	1.82056	0.501758	0.292	0.146513	1.6698	Up	MGI:894644
Cacnb3	ENSMUSG00000003352	25.5705	17.2348	21.4027	0.38947	0.724	0.281977	1.48366	Up	MGI:103307
Cacng1	ENSMUSG00000020722	0.638188	0.444174	0.541181	0.358501	0.188	0.0673982	1.4368	Up	MGI:1206582
Cacng4	ENSMUSG00000020723	8.73868	5.82412	7.2814	0.400275	0.463	0.185327	1.50043	Up	MGI:1859167
Cacng5	ENSMUSG00000040373	2.08558	9.50261	5.7941	1.2801	0.423	0.541483	-4.55634	Down	MGI:2157946
Cacng6	ENSMUSG00000097894	1.46719	1.49468	1.48093	0.0185592	0.272	0.00504811	-1.01873	Down
Cacng7	ENSMUSG00000096998	9.78151	4.51482	7.14817	0.736789	0.459	0.338186	2.16653	Up
Cacng8	ENSMUSG00000106728	0.872047	0.489166	0.680607	0.562559	0.207	0.11645	1.78272	Up
Cacybp	ENSMUSG00000014226	33.9314	47.0707	40.501	0.324419	0.898	0.291328	-1.38723	Down	MGI:1270839	cell differentiation
Cad	ENSMUSG00000013629	59.7711	48.867	54.319	0.200742	0.952	0.191106	1.22314	Up	MGI:1916969
Cadm1	ENSMUSG00000032076	42.2006	64.9994	53.6	0.425351	0.95	0.404083	-1.54025	Down	MGI:1889272	cell differentiation	abnormal male fertility
Cadm3	ENSMUSG00000005338	4.97282	6.45999	5.7164	0.260158	0.421	0.109527	-1.29906	Down	MGI:2137858
Cadm4	ENSMUSG00000054793	15.5217	14.2801	14.9009	0.0833238	0.625	0.0520774	1.08695	Up	MGI:2449088
Cadps	ENSMUSG00000054423	4.40283	4.67764	4.54024	0.0605277	0.39	0.0236058	-1.06242	Down	MGI:1350922
Cadps2	ENSMUSG00000017978	5.15026	8.52344	6.83685	0.493382	0.451	0.222515	-1.65495	Down	MGI:2443963
Calb1	ENSMUSG00000028222	0.0932102	0.107937	0.100574	0.146428	0.048	0.00702855	-1.158	Down	MGI:88248
Calb2	ENSMUSG00000003657	3.96064	2.70104	3.33084	0.378163	0.354	0.13387	1.46634	Up	MGI:101914
Calca	ENSMUSG00000030669	0	0.194405	0.0972025	2	0.045	0.09	0	Down	MGI:2151253	cell differentiation
Calcb	ENSMUSG00000030666	0.134796	0	0.067398	2	0.017	0.034	0	Up	MGI:2151254
Calcoco1	ENSMUSG00000023055	42.6181	35.1956	38.9068	0.190776	0.889	0.1696	1.21089	Up	MGI:1914738
Calcoco2	ENSMUSG00000006056	0.221868	0.0699228	0.145895	1.04147	0.079	0.0822759	3.17304	Up	MGI:1343177
Calcrl	ENSMUSG00000059588	0.361237	0.63929	0.500263	0.555813	0.181	0.100602	-1.76972	Down	MGI:1926944	cell proliferation
Cald1	ENSMUSG00000029761	5.7255	3.23854	4.48202	0.554875	0.389	0.215846	1.76793	Up	MGI:88250
Calhm1	ENSMUSG00000079258	0	0.10713	0.053565	2	0.003	0.006	0	Down	MGI:3643383
Calhm2	ENSMUSG00000033033	6.06381	8.28527	7.17454	0.309631	0.459	0.142121	-1.36635	Down	MGI:1919941
Calm1	ENSMUSG00000001175	26.6877	34.4974	30.5925	0.255281	0.826	0.210862	-1.29263	Down	MGI:88251
Calm2	ENSMUSG00000036438	58.3927	92.548	75.4703	0.452566	0.983	0.444872	-1.58492	Down	MGI:103250
Calm3	ENSMUSG00000019370	74.4954	68.0968	71.2961	0.0897468	0.979	0.0878622	1.09396	Up	MGI:103249
Calm5	ENSMUSG00000099269	0	0.24221	0.121105	2	0.064	0.128	0	Down	MGI:3511177
Calml4	ENSMUSG00000032246	0.137156	0.126988	0.132072	0.0769883	0.071	0.00546617	1.08007	Up	MGI:1922850
Caln1	ENSMUSG00000060371	0.298955	0.368082	0.333519	0.207266	0.15	0.0310899	-1.23123	Down	MGI:2155987
Calr	ENSMUSG00000003814	98.2492	108.25	103.25	0.0968604	0.995	0.0963761	-1.10179	Down	MGI:88252	cell proliferation;cell differentiation
Calr4	ENSMUSG00000028558	5.78635	7.43025	6.6083	0.248763	0.444	0.110451	-1.2841	Down	MGI:2140435
Calu	ENSMUSG00000029767	59.1515	67.4079	63.2797	0.130475	0.969	0.12643	-1.13958	Down	MGI:1097158
Caly	ENSMUSG00000025468	2.23079	1.07511	1.65295	0.699162	0.282	0.197164	2.07494	Up	MGI:1915816
Camk1d	ENSMUSG00000039145	5.09968	4.50008	4.79988	0.12492	0.398	0.0497181	1.13324	Up	MGI:2442190	cell differentiation
Camk1g	ENSMUSG00000016179	0.288989	0.132567	0.210778	0.742117	0.111	0.082375	2.17995	Up	MGI:2388073
Camk2a	ENSMUSG00000024617	0.454811	0.237533	0.346172	0.627659	0.152	0.0954042	1.91473	Up	MGI:88256	cell differentiation
Camk2b	ENSMUSG00000057897	2.98059	2.71968	2.85013	0.0915399	0.337	0.0308489	1.09593	Up	MGI:88257	cell differentiation
Camk2d	ENSMUSG00000053819	8.32464	8.81531	8.56997	0.0572545	0.491	0.028112	-1.05894	Down	MGI:1341265	cell proliferation;cell differentiation
Camk2g	ENSMUSG00000021820	19.1894	19.16	19.1747	0.00153327	0.692	0.00106102	1.00153	Up	MGI:88259	cell differentiation
Camk2n1	ENSMUSG00000046447	8.2536	8.0533	8.15345	0.0245663	0.482	0.011841	1.02487	Up	MGI:1913509	cell proliferation
Camk4	ENSMUSG00000038128	11.8714	12.6511	12.2613	0.0635906	0.575	0.0365646	-1.06568	Down	MGI:88258	cell differentiation	abnormal male fertility
Camkk1	ENSMUSG00000020785	5.59411	4.83205	5.21308	0.146182	0.408	0.0596424	1.15771	Up	MGI:1891766
Camkk2	ENSMUSG00000029471	45.2666	46.0548	45.6607	0.0172621	0.923	0.0159329	-1.01741	Down	MGI:2444812
Caml	ENSMUSG00000021501	20.6371	20.0263	20.3317	0.0300418	0.709	0.0212996	1.0305	Up	MGI:104728
Camp	ENSMUSG00000038357	3.49852	2.23473	2.86662	0.440863	0.337	0.148571	1.56552	Up	MGI:108443	cell proliferation
Camsap1	ENSMUSG00000026933	28.2988	28.6529	28.4759	0.0124351	0.805	0.0100103	-1.01251	Down	MGI:3036242	cell differentiation
Cand1	ENSMUSG00000020114	54.1099	74.0282	64.0691	0.310888	0.97	0.301561	-1.36811	Down	MGI:1261820	cell differentiation
Cand2	ENSMUSG00000030319	9.20426	7.83301	8.51863	0.160971	0.489	0.0787146	1.17506	Up	MGI:1914338
Cant1	ENSMUSG00000025575	17.5158	15.7978	16.6568	0.103141	0.653	0.0673511	1.10875	Up	MGI:1923275
Canx	ENSMUSG00000020368	40.6854	58.0446	49.365	0.35165	0.938	0.329848	-1.42667	Down	MGI:88261
Cap1	ENSMUSG00000028656	47.0976	43.9994	45.5485	0.0680198	0.922	0.0627143	1.07041	Up	MGI:88262
Cap2	ENSMUSG00000021373	4.12328	2.39133	3.25731	0.531713	0.352	0.187163	1.72426	Up	MGI:1914502
Capg	ENSMUSG00000056737	17.1701	10.7743	13.9722	0.457752	0.608	0.278313	1.59362	Up	MGI:1098259
Capn1	ENSMUSG00000024942	14.1108	9.18398	11.6474	0.422998	0.562	0.237725	1.53646	Up	MGI:88263
Capn10	ENSMUSG00000026270	24.5592	24.188	24.3736	0.0152296	0.763	0.0116202	1.01535	Up	MGI:1344392
Capn11	ENSMUSG00000058626	0.107912	0.121098	0.114505	0.115157	0.059	0.00679424	-1.12219	Down	MGI:1352490
Capn2	ENSMUSG00000026509	4.865	2.75889	3.81195	0.552502	0.369	0.203873	1.76339	Up	MGI:88264	cell differentiation
Capn3	ENSMUSG00000079110	0.112741	0.204789	0.158765	0.579775	0.088	0.0510202	-1.81646	Down	MGI:107437	cell differentiation
Capn5	ENSMUSG00000035547	15.1396	10.1079	12.6238	0.39859	0.581	0.231581	1.4978	Up	MGI:1100859
Capn6	ENSMUSG00000067276	43.2482	39.3852	41.3167	0.0934973	0.902	0.0843346	1.09808	Up	MGI:1100850
Capn7	ENSMUSG00000021893	33.8103	42.9445	38.3774	0.23801	0.886	0.210877	-1.27016	Down	MGI:1338030
Capn8	ENSMUSG00000038599	0.0601397	0.0476478	0.0538937	0.231788	0.004	0.00092715	1.26217	Up	MGI:2181366
Capn9	ENSMUSG00000031981	0.120275	0	0.0601375	2	0.009	0.018	0	Up	MGI:1920897
Capns1	ENSMUSG00000001794	95.4816	98.4103	96.946	0.0302096	0.993	0.0299981	-1.03067	Down	MGI:88266
Capns2	ENSMUSG00000078144	0.252606	0.234787	0.243696	0.0731196	0.123	0.00899372	1.07589	Up	MGI:1916793
Caprin1	ENSMUSG00000027184	54.2837	63.3081	58.7959	0.153487	0.962	0.147654	-1.16625	Down	MGI:1858234	cell differentiation
Caprin2	ENSMUSG00000030309	35.7526	40.2899	38.0213	0.119336	0.884	0.105493	-1.12691	Down	MGI:2448541	cell differentiation
Caps2	ENSMUSG00000035694	0.188339	0.260325	0.224332	0.32089	0.116	0.0372233	-1.38222	Down	MGI:2441980
Capsl	ENSMUSG00000039676	8.84183	3.14062	5.99123	0.951593	0.428	0.407282	2.81531	Up	MGI:1922818
Capza2	ENSMUSG00000015733	34.194	52.1351	43.1646	0.415644	0.912	0.379068	-1.52469	Down	MGI:106222
Capza3	ENSMUSG00000041791	0	0.126225	0.0631125	2	0.012	0.024	0	Down	MGI:106221	cell differentiation	abnormal male fertility
Capzb	ENSMUSG00000028745	72.0604	71.9799	72.0202	0.00111774	0.98	0.00109539	1.00112	Up	MGI:104652	cell differentiation
Car10	ENSMUSG00000056158	0.143153	0.152982	0.148068	0.0663819	0.081	0.00537693	-1.06866	Down	MGI:1919855
Car11	ENSMUSG00000003273	5.90923	3.74732	4.82827	0.44776	0.398	0.178209	1.57692	Up	MGI:1336193
Car12	ENSMUSG00000032373	1.21273	0.61334	0.913035	0.656481	0.233	0.15296	1.97726	Up	MGI:1923709
Car13	ENSMUSG00000027555	0.798003	1.10885	0.953426	0.326031	0.235	0.0766174	-1.38953	Down	MGI:1931322
Car14	ENSMUSG00000038526	6.91796	3.75899	5.33847	0.591736	0.411	0.243204	1.84038	Up	MGI:1344341
Car15	ENSMUSG00000090236	15.9447	17.4064	16.6756	0.0876553	0.653	0.0572389	-1.09167	Down	MGI:1931324
Car2	ENSMUSG00000027562	1.12653	0.503839	0.815184	0.763865	0.222	0.169578	2.23589	Up	MGI:88269	cell differentiation	abnormal male fertility
Car4	ENSMUSG00000000805	0.537397	0.237859	0.387628	0.772746	0.161	0.124412	2.25931	Up	MGI:1096574		abnormal male fertility
Car5b	ENSMUSG00000031373	4.83227	10.2907	7.56148	0.721873	0.469	0.338558	-2.12958	Down	MGI:1926249
Car6	ENSMUSG00000028972	3.42522	1.00812	2.21667	1.09042	0.311	0.33912	3.39763	Up	MGI:1333786
Car7	ENSMUSG00000031883	1.80142	1.38747	1.59444	0.25962	0.28	0.0726936	1.29835	Up	MGI:103100
Car8	ENSMUSG00000041261	0.168771	0.275316	0.222044	0.479838	0.115	0.0551814	-1.6313	Down	MGI:88253
Car9	ENSMUSG00000028463	0.12555	0.0591895	0.0923698	0.718422	0.042	0.0301737	2.12115	Up	MGI:2447188
Card10	ENSMUSG00000033170	16.5557	12.8418	14.6988	0.252668	0.621	0.156907	1.2892	Up	MGI:2146012
Card11	ENSMUSG00000036526	0.338914	0.308228	0.323571	0.0948354	0.148	0.0140356	1.09956	Up	MGI:1916978	cell proliferation;cell differentiation
Card6	ENSMUSG00000041849	4.63991	3.53822	4.08906	0.269423	0.377	0.101573	1.31137	Up	MGI:3032959
Card9	ENSMUSG00000026928	0.203451	0.199705	0.201578	0.0185834	0.107	0.00198842	1.01876	Up	MGI:2685628
Carf	ENSMUSG00000026017	4.02028	4.22082	4.12055	0.0486683	0.378	0.0183966	-1.04988	Down	MGI:2182269
Carhsp1	ENSMUSG00000008393	20.0927	19.85	19.9714	0.0121524	0.704	0.0085553	1.01223	Up	MGI:1196368
Carkd	ENSMUSG00000031505	23.4647	20.4807	21.9727	0.135805	0.732	0.0994092	1.1457	Up	MGI:1913353
Carns1	ENSMUSG00000075289	3.13689	3.41425	3.27557	0.0846737	0.352	0.0298052	-1.08842	Down	MGI:2147595
Cars	ENSMUSG00000010755	25.4864	22.5979	24.0421	0.120143	0.758	0.0910685	1.12782	Up	MGI:1351477
Cars2	ENSMUSG00000056228	22.231	19.3843	20.8077	0.13681	0.716	0.0979561	1.14686	Up	MGI:1919191
Cartpt	ENSMUSG00000021647	3.55779	2.29937	2.92858	0.429703	0.339	0.145669	1.54729	Up	MGI:1351330	cell differentiation
Casc4	ENSMUSG00000060227	27.1017	32.4917	29.7967	0.180893	0.818	0.14797	-1.19888	Down	MGI:2443129
Casc5	ENSMUSG00000027326	7.67014	10.7394	9.20477	0.333442	0.506	0.168722	-1.40016	Down	MGI:1923714
Cask	ENSMUSG00000031012	6.7344	8.06485	7.39963	0.1798	0.465	0.0836068	-1.19756	Down	MGI:1309489	cell proliferation;cell differentiation
Caskin1	ENSMUSG00000033597	22.009	21.5114	21.7602	0.0228674	0.729	0.0166704	1.02313	Up	MGI:2442952
Caskin2	ENSMUSG00000034471	10.4253	8.11043	9.26787	0.249774	0.508	0.126885	1.28542	Up	MGI:2157062
Casp1	ENSMUSG00000025888	0.161581	0	0.0807905	2	0.031	0.062	0	Up	MGI:96544	cell differentiation
Casp12	ENSMUSG00000025887	0.100953	0.0498271	0.0753901	0.678152	0.026	0.0176319	2.02607	Up	MGI:1312922
Casp14	ENSMUSG00000005355	0.170288	0.149633	0.159961	0.129126	0.088	0.0113631	1.13804	Up	MGI:1335092	cell differentiation
Casp2	ENSMUSG00000029863	31.2351	33.7743	32.5047	0.0781179	0.843	0.0658534	-1.08129	Down	MGI:97295	cell differentiation
Casp3	ENSMUSG00000031628	6.44398	5.14928	5.79663	0.223354	0.423	0.0944787	1.25143	Up	MGI:107739	cell proliferation;cell differentiation
Casp6	ENSMUSG00000027997	19.4405	20.3285	19.8845	0.0446579	0.703	0.0313945	-1.04568	Down	MGI:1312921	cell differentiation
Casp8	ENSMUSG00000026029	7.83063	10.8477	9.33916	0.323056	0.51	0.164758	-1.38529	Down	MGI:1261423	cell differentiation
Casp8ap2	ENSMUSG00000028282	15.1488	21.8463	18.4976	0.362075	0.68	0.246211	-1.44211	Down	MGI:1349399
Casp9	ENSMUSG00000028914	16.6505	16.3823	16.5164	0.0162384	0.651	0.0105712	1.01637	Up	MGI:1277950
Casq1	ENSMUSG00000007122	0.0828882	0.0988787	0.0908835	0.175945	0.04	0.00703781	-1.19292	Down	MGI:1309468	cell differentiation
Cass4	ENSMUSG00000074570	1.41033	1.28415	1.34724	0.0936581	0.265	0.0248194	1.09826	Up	MGI:2444482
Casz1	ENSMUSG00000028977	7.71603	5.441	6.57851	0.345827	0.443	0.153201	1.41813	Up	MGI:1196251	cell differentiation
Cat	ENSMUSG00000027187	28.5972	23.234	25.9156	0.206949	0.779	0.161213	1.23083	Up	MGI:88271
Catsper2	ENSMUSG00000033486	8.98536	12.7312	10.8583	0.344975	0.544	0.187667	-1.41688	Down	MGI:2387404	cell differentiation	abnormal male fertility
Catsper3	ENSMUSG00000021499	0.164119	0.32455	0.244335	0.656604	0.123	0.0807623	-1.97753	Down	MGI:1924106	cell differentiation	abnormal male fertility
Catsper4	ENSMUSG00000048003	0	0.163921	0.0819605	2	0.032	0.064	0	Down	MGI:3043288	cell differentiation	abnormal male fertility
Catsperg1	ENSMUSG00000049676	1.52881	1.5929	1.56086	0.0410608	0.278	0.0114149	-1.04192	Down	MGI:2443617
Catsperg2	ENSMUSG00000049123	0.497804	0.518416	0.50811	0.040567	0.183	0.00742376	-1.04141	Down	MGI:1923968	cell differentiation
Cav1	ENSMUSG00000007655	4.32441	3.5193	3.92185	0.205288	0.372	0.0763672	1.22877	Up	MGI:102709	cell proliferation;cell differentiation
Cav2	ENSMUSG00000000058	0.60282	0.788089	0.695455	0.2664	0.209	0.0556776	-1.30734	Down	MGI:107571	cell proliferation;cell differentiation
Cav3	ENSMUSG00000062694	0.101867	0	0.0509335	2	0	0	0	Up	MGI:107570	cell proliferation;cell differentiation
Cbfa2t2	ENSMUSG00000038533	10.1604	9.98945	10.0749	0.0169679	0.528	0.00895903	1.01711	Up	MGI:1333833	cell differentiation	abnormal male fertility;abnormal spermatogenesis
Cbfa2t3	ENSMUSG00000006362	15.2763	8.82029	12.0483	0.535844	0.571	0.305967	1.73195	Up	MGI:1338013	cell proliferation;cell differentiation
Cbfb	ENSMUSG00000031885	33.6491	44.4046	39.0268	0.275592	0.89	0.245277	-1.31964	Down	MGI:99851	cell differentiation
Cbl	ENSMUSG00000034342	9.88684	10.8187	10.3528	0.0900107	0.534	0.0480657	-1.09425	Down	MGI:88279
Cblb	ENSMUSG00000022637	17.0542	15.9258	16.49	0.0684294	0.65	0.0444791	1.07085	Up	MGI:2146430	cell proliferation
Cblc	ENSMUSG00000040525	0.471235	0.697869	0.584552	0.387705	0.194	0.0752149	-1.48094	Down	MGI:1931457
Cbll1	ENSMUSG00000020659	17.072	16.9088	16.9904	0.00960542	0.658	0.00632037	1.00965	Up	MGI:2144842
Cbln2	ENSMUSG00000024647	3.72561	3.47162	3.59862	0.0705799	0.362	0.0255499	1.07316	Up	MGI:88282
Cbln3	ENSMUSG00000040380	0.791057	1.051	0.921029	0.282231	0.233	0.0657599	-1.3286	Down	MGI:1889286
Cbln4	ENSMUSG00000067578	2.75436	0.450158	1.60226	1.4381	0.28	0.402667	6.11865	Up	MGI:2154433
Cbr1	ENSMUSG00000051483	30.0508	19.3036	24.6772	0.435512	0.766	0.333602	1.55675	Up	MGI:88284
Cbr2	ENSMUSG00000025150	5.25465	3.10322	4.17894	0.514827	0.38	0.195634	1.69329	Up	MGI:107200
Cbr3	ENSMUSG00000022947	2.6898	2.01909	2.35445	0.28487	0.317	0.0903037	1.33218	Up	MGI:1309992
Cbr4	ENSMUSG00000031641	5.58235	7.35757	6.46996	0.274379	0.44	0.120727	-1.31801	Down	MGI:2384567
Cbs	ENSMUSG00000024039	0.24287	0.209836	0.226353	0.14594	0.117	0.017075	1.15743	Up	MGI:88285
Cbwd1	ENSMUSG00000024878	10.5894	17.0659	13.8276	0.468373	0.605	0.283366	-1.6116	Down	MGI:2385089
Cbx1	ENSMUSG00000018666	33.7767	72.9481	53.3624	0.734064	0.949	0.696626	-2.15972	Down	MGI:105369
Cbx2	ENSMUSG00000025577	47.0175	37.1098	42.0636	0.235541	0.907	0.213635	1.26698	Up	MGI:88289
Cbx4	ENSMUSG00000039989	17.7864	16.5368	17.1616	0.0728137	0.661	0.0481299	1.07556	Up	MGI:1195985
Cbx5	ENSMUSG00000009575	13.9573	22.5843	18.2708	0.472174	0.677	0.319662	-1.6181	Down	MGI:109372
Cbx7	ENSMUSG00000053411	8.2884	6.42386	7.35613	0.253468	0.464	0.117609	1.29025	Up	MGI:1196439
Cbx8	ENSMUSG00000025578	11.3135	8.82467	10.0691	0.247175	0.528	0.130509	1.28203	Up	MGI:1353589	cell proliferation
Cc2d1a	ENSMUSG00000036686	42.2142	31.413	36.8136	0.293402	0.876	0.257021	1.34384	Up	MGI:2384831
Cc2d1b	ENSMUSG00000028582	32.2761	27.7853	30.0307	0.14954	0.821	0.122773	1.16163	Up	MGI:2443076
Cc2d2a	ENSMUSG00000039765	4.35996	3.11326	3.73661	0.333645	0.366	0.122114	1.40045	Up	MGI:1924487
Ccar1	ENSMUSG00000020074	40.9893	38.8577	39.9235	0.0533921	0.895	0.0477859	1.05486	Up	MGI:1914750	cell proliferation
Ccbe1	ENSMUSG00000046318	5.52913	6.58937	6.05925	0.174979	0.43	0.0752409	-1.19176	Down	MGI:2445053
Ccdc102a	ENSMUSG00000063605	4.19246	2.62031	3.40638	0.46153	0.357	0.164766	1.59999	Up	MGI:2686927
Ccdc103	ENSMUSG00000020930	3.73974	2.6981	3.21892	0.323599	0.349	0.112936	1.38606	Up	MGI:1920543
Ccdc105	ENSMUSG00000078442	0.256475	0.238107	0.247291	0.0742769	0.125	0.00928461	1.07714	Up	MGI:1918226
Ccdc107	ENSMUSG00000028461	15.9108	10.8513	13.3811	0.378109	0.597	0.225731	1.46626	Up	MGI:1913423
Ccdc108	ENSMUSG00000047021	0.380608	0.341633	0.361121	0.107928	0.156	0.0168368	1.11408	Up	MGI:2444274
Ccdc109b	ENSMUSG00000027994	0	0.180323	0.0901615	2	0.039	0.078	0	Down	MGI:1914065
Ccdc110	ENSMUSG00000071104	0.0160749	0.0983125	0.0571937	1.43788	0.006	0.00862727	-6.1159	Down	MGI:2685018
Ccdc113	ENSMUSG00000036598	4.92305	3.42555	4.1743	0.358743	0.38	0.136322	1.43716	Up	MGI:3606076
Ccdc114	ENSMUSG00000040189	3.28034	2.50275	2.89154	0.268919	0.338	0.0908945	1.31069	Up	MGI:2446120
Ccdc115	ENSMUSG00000042111	18.4761	22.8702	20.6731	0.212551	0.714	0.151761	-1.23783	Down	MGI:1916918
Ccdc116	ENSMUSG00000022768	2.48615	2.9034	2.69477	0.154837	0.331	0.0512509	-1.16783	Down	MGI:1924122
Ccdc117	ENSMUSG00000020482	16.677	20.517	18.597	0.206485	0.682	0.140823	-1.23026	Down	MGI:2144383
Ccdc12	ENSMUSG00000019659	84.4319	53.96	69.1959	0.440371	0.978	0.430683	1.56471	Up	MGI:1919904
Ccdc120	ENSMUSG00000031150	14.6743	10.2253	12.4498	0.357355	0.578	0.206551	1.4351	Up	MGI:1859619
Ccdc121	ENSMUSG00000050625	0.0631288	0.0639905	0.0635596	0.0135573	0.013	0.000176245	-1.01365	Down	MGI:2685601
Ccdc122	ENSMUSG00000034795	8.05039	7.82021	7.9353	0.0290071	0.477	0.0138364	1.02943	Up	MGI:1918358
Ccdc124	ENSMUSG00000007721	36.2515	32.0069	34.1292	0.124369	0.856	0.10646	1.13262	Up	MGI:1916403
Ccdc126	ENSMUSG00000050786	4.00899	3.37055	3.68977	0.17303	0.365	0.0631558	1.18942	Up	MGI:1889376
Ccdc127	ENSMUSG00000021578	13.7871	15.5615	14.6743	0.120919	0.62	0.0749697	-1.1287	Down	MGI:1914683
Ccdc13	ENSMUSG00000079235	1.77845	1.99985	1.88915	0.117196	0.296	0.0346899	-1.12449	Down	MGI:1920144
Ccdc130	ENSMUSG00000004994	11.9956	8.52577	10.2607	0.338167	0.532	0.179905	1.40698	Up	MGI:1914986
Ccdc134	ENSMUSG00000068114	13.8658	12.7348	13.3003	0.0850357	0.595	0.0505962	1.08881	Up	MGI:1923707
Ccdc136	ENSMUSG00000029769	23.9125	21.8982	22.9053	0.0879402	0.743	0.0653395	1.09198	Up	MGI:1918128	cell differentiation
Ccdc137	ENSMUSG00000049957	4.60073	4.77903	4.68988	0.038018	0.395	0.0150171	-1.03875	Down	MGI:1914541
Ccdc138	ENSMUSG00000038010	9.37465	9.49274	9.4337	0.0125179	0.512	0.00640916	-1.0126	Down	MGI:1923388
Ccdc14	ENSMUSG00000022833	5.96676	5.44483	5.7058	0.0914737	0.421	0.0385104	1.09586	Up	MGI:2443448
Ccdc142	ENSMUSG00000107499	2.69683	3.24783	2.97233	0.185376	0.341	0.0632134	-1.20431	Down	MGI:3045292
Ccdc146	ENSMUSG00000064280	0.105622	0.109103	0.107362	0.0324229	0.053	0.00171841	-1.03296	Down	MGI:1922422
Ccdc148	ENSMUSG00000036641	0.100263	0.107631	0.103947	0.0708823	0.05	0.00354411	-1.07349	Down	MGI:3039583
Ccdc150	ENSMUSG00000025983	1.08468	2.09459	1.58964	0.635309	0.28	0.177887	-1.93107	Down	MGI:1925266
Ccdc151	ENSMUSG00000039632	1.35154	0.917864	1.1347	0.382194	0.251	0.0959306	1.47248	Up	MGI:1924859
Ccdc152	ENSMUSG00000091119	11.1719	10.5418	10.8569	0.0580371	0.544	0.0315722	1.05977	Up	MGI:3641617
Ccdc155	ENSMUSG00000038292	12.2078	5.88659	9.0472	0.698693	0.502	0.350744	2.07383	Up	MGI:2687329	cell differentiation	abnormal male fertility
Ccdc157	ENSMUSG00000051427	5.46294	6.56334	6.01314	0.182999	0.429	0.0785067	-1.20143	Down	MGI:3041210
Ccdc158	ENSMUSG00000050050	4.40984	5.51293	4.96138	0.222335	0.402	0.0893787	-1.25014	Down	MGI:2444555
Ccdc160	ENSMUSG00000073207	12.4127	14.6049	13.5088	0.162279	0.599	0.0972054	-1.17661	Down	MGI:3588225
Ccdc162	ENSMUSG00000109989	0.477192	0.428112	0.452652	0.108428	0.174	0.0188664	1.11464	Up
Ccdc163	ENSMUSG00000028689	12.6499	14.3911	13.5205	0.128782	0.599	0.0771405	-1.13765	Down	MGI:1915644
Ccdc18	ENSMUSG00000056531	4.75369	5.98088	5.36728	0.228643	0.412	0.0942008	-1.25816	Down	MGI:1922974
Ccdc25	ENSMUSG00000022035	55.0228	60.2659	57.6444	0.090956	0.96	0.0873178	-1.09529	Down	MGI:1914429
Ccdc27	ENSMUSG00000039492	0.0721411	0.0689005	0.0705208	0.0459524	0.02	0.000919048	1.04703	Up	MGI:2685881
Ccdc28a	ENSMUSG00000059554	13.5584	14.4913	14.0249	0.0665176	0.609	0.0405092	-1.06881	Down	MGI:2443508
Ccdc3	ENSMUSG00000026676	1.32622	0.935888	1.13105	0.345105	0.251	0.0866213	1.41707	Up	MGI:1921436	cell differentiation
Ccdc30	ENSMUSG00000028637	1.70661	1.52573	1.61617	0.111919	0.281	0.0314492	1.11855	Up	MGI:1920582
Ccdc32	ENSMUSG00000039983	7.92026	11.8374	9.87883	0.396519	0.523	0.207379	-1.49457	Down	MGI:2685477
Ccdc33	ENSMUSG00000037716	0.270831	0.0998927	0.185362	0.922187	0.1	0.0922187	2.71122	Up	MGI:1922464
Ccdc34	ENSMUSG00000027160	26.5534	32.9461	29.7497	0.214882	0.818	0.175774	-1.24075	Down	MGI:1915451
Ccdc36	ENSMUSG00000047220	11.2514	15.2342	13.2428	0.300752	0.593	0.178346	-1.35398	Down	MGI:3612242	cell differentiation
Ccdc38	ENSMUSG00000036168	0.897182	0.701704	0.799443	0.244518	0.22	0.0537939	1.27858	Up	MGI:2444738
Ccdc39	ENSMUSG00000027676	2.28042	3.37558	2.828	0.387256	0.336	0.130118	-1.48024	Down	MGI:1289263
Ccdc42	ENSMUSG00000045915	1.62899	1.30884	1.46891	0.21795	0.272	0.0592824	1.24461	Up	MGI:3045254	cell differentiation	abnormal male fertility
Ccdc47	ENSMUSG00000078622	17.8466	22.3882	20.1174	0.225755	0.706	0.159383	-1.25448	Down	MGI:1914413
Ccdc50	ENSMUSG00000038127	6.78123	7.18932	6.98527	0.0584215	0.455	0.0265818	-1.06018	Down	MGI:1914751
Ccdc51	ENSMUSG00000025645	2.88437	2.52276	2.70357	0.133753	0.332	0.044406	1.14334	Up	MGI:1913908
Ccdc53	ENSMUSG00000020056	15.4415	12.8847	14.1631	0.180525	0.611	0.110301	1.19844	Up	MGI:1914532
Ccdc54	ENSMUSG00000050685	0	0.270091	0.135046	2	0.073	0.146	0	Down	MGI:1916589
Ccdc57	ENSMUSG00000048445	12.0783	9.90508	10.9917	0.197715	0.548	0.108348	1.2194	Up	MGI:1918526
Ccdc58	ENSMUSG00000075229	44.0241	51.1387	47.5814	0.149525	0.932	0.139357	-1.16161	Down	MGI:2146423
Ccdc59	ENSMUSG00000019897	14.7295	16.7361	15.7328	0.127542	0.64	0.0816272	-1.13623	Down	MGI:1289302
Ccdc6	ENSMUSG00000048701	86.5052	63.4568	74.981	0.30739	0.983	0.302164	1.36321	Up	MGI:1923801
Ccdc60	ENSMUSG00000043913	0.787259	0.315754	0.551507	0.85494	0.19	0.162439	2.49327	Up	MGI:2141043
Ccdc61	ENSMUSG00000074358	35.3151	30.8748	33.0949	0.134169	0.848	0.113775	1.14382	Up	MGI:2685005
Ccdc63	ENSMUSG00000043036	0.229158	0.14254	0.185849	0.466067	0.101	0.0470727	1.60768	Up	MGI:3607777	cell differentiation
Ccdc64	ENSMUSG00000041609	30.2311	22.3366	26.2839	0.300356	0.783	0.235178	1.35343	Up	MGI:1922915	cell differentiation
Ccdc65	ENSMUSG00000003354	1.78013	1.45654	1.61834	0.199952	0.281	0.0561866	1.22216	Up	MGI:2146001
Ccdc66	ENSMUSG00000046753	7.15218	6.95588	7.05403	0.0278281	0.456	0.0126896	1.02822	Up	MGI:2443639	cell differentiation
Ccdc67	ENSMUSG00000039977	0.0761272	0.189071	0.132599	0.851769	0.071	0.0604756	-2.48362	Down	MGI:2443026	cell differentiation
Ccdc68	ENSMUSG00000038903	1.65979	1.37756	1.51867	0.18584	0.275	0.0511059	1.20488	Up	MGI:3612676
Ccdc69	ENSMUSG00000049588	7.15601	6.97379	7.0649	0.0257923	0.457	0.0117871	1.02613	Up	MGI:1196234
Ccdc70	ENSMUSG00000017049	0	0.289842	0.144921	2	0.079	0.158	0	Down	MGI:1915179
Ccdc74a	ENSMUSG00000041617	5.21207	4.16206	4.68707	0.224023	0.394	0.088265	1.25228	Up	MGI:1919565
Ccdc77	ENSMUSG00000030177	9.28682	9.81188	9.54935	0.0549838	0.516	0.0283717	-1.05654	Down	MGI:1914450
Ccdc8	ENSMUSG00000041117	5.11623	2.26122	3.68872	0.773983	0.365	0.282504	2.2626	Up	MGI:3612184
Ccdc80	ENSMUSG00000022665	3.0996	1.38309	2.24134	0.765838	0.313	0.239707	2.24107	Up	MGI:1915146
Ccdc81	ENSMUSG00000039391	0.0968698	0.0389037	0.0678867	0.853865	0.017	0.0145157	2.48999	Up	MGI:1918134
Ccdc83	ENSMUSG00000030617	0.10568	0.482796	0.294238	1.28167	0.139	0.178152	-4.56847	Down	MGI:1918255
Ccdc84	ENSMUSG00000043923	11.615	10.2905	10.9527	0.120929	0.546	0.066027	1.12871	Up	MGI:2685960
Ccdc85a	ENSMUSG00000032878	0.10776	0.0634116	0.0855858	0.518175	0.035	0.0181361	1.69937	Up	MGI:2445069
Ccdc85c	ENSMUSG00000084883	23.8782	21.4341	22.6562	0.107878	0.74	0.0798297	1.11403	Up	MGI:3644008
Ccdc86	ENSMUSG00000024732	21.7314	15.8296	18.7805	0.314251	0.684	0.214948	1.37283	Up	MGI:1277220
Ccdc88a	ENSMUSG00000032740	14.0741	17.679	15.8765	0.227058	0.642	0.145771	-1.25614	Down	MGI:1925177	cell proliferation;cell differentiation
Ccdc88b	ENSMUSG00000047810	1.61303	1.08948	1.35126	0.387455	0.265	0.102675	1.48055	Up	MGI:1925567	cell proliferation
Ccdc88c	ENSMUSG00000021182	39.6345	31.4811	35.5578	0.2293	0.869	0.199262	1.25899	Up	MGI:1915589
Ccdc89	ENSMUSG00000044362	0.257585	0.454267	0.355926	0.552592	0.155	0.0856518	-1.76356	Down	MGI:1917304
Ccdc9	ENSMUSG00000041375	16.3552	14.4104	15.3828	0.126427	0.634	0.0801547	1.13496	Up	MGI:1921443
Ccdc90b	ENSMUSG00000030613	24.7845	36.0752	30.4299	0.37104	0.824	0.305737	-1.45555	Down	MGI:1913615
Ccdc91	ENSMUSG00000030301	23.1195	23.052	23.0857	0.00292388	0.745	0.00217829	1.00293	Up	MGI:1914265
Ccdc93	ENSMUSG00000026339	12.0164	12.2604	12.1384	0.0201015	0.572	0.0114981	-1.02031	Down	MGI:1918079
Ccdc94	ENSMUSG00000003208	9.95891	8.75504	9.35697	0.12866	0.511	0.0657453	1.13751	Up	MGI:1920136
Cchcr1	ENSMUSG00000040312	10.0397	9.80867	9.92418	0.0232795	0.525	0.0122217	1.02355	Up	MGI:2385321	cell differentiation
Ccin	ENSMUSG00000070999	0.0761004	0.0819869	0.0790436	0.0744715	0.029	0.00215967	-1.07735	Down	MGI:3045316	cell differentiation
Cck	ENSMUSG00000032532	0.378231	3.23965	1.80894	1.58182	0.291	0.46031	-8.56527	Down	MGI:88297	cell proliferation;cell differentiation
Cckbr	ENSMUSG00000030898	0.334305	0.0462124	0.190259	1.51422	0.103	0.155964	7.2341	Up	MGI:99479	cell proliferation
Ccl1	ENSMUSG00000020702	0.14903	0	0.074515	2	0.025	0.05	0	Up	MGI:98258
Ccl12	ENSMUSG00000035352	0	0.215072	0.107536	2	0.054	0.108	0	Down	MGI:108224	cell proliferation;cell differentiation
Ccl17	ENSMUSG00000031780	0.728424	0.51751	0.622967	0.338564	0.199	0.0673742	1.40756	Up	MGI:1329039	cell differentiation
Ccl2	ENSMUSG00000035385	0.663171	0.31477	0.48897	0.712519	0.18	0.128254	2.10684	Up	MGI:98259	cell proliferation;cell differentiation
Ccl21a	ENSMUSG00000094686	0	0.19379	0.096895	2	0.045	0.09	0	Down	MGI:1349183
Ccl22	ENSMUSG00000031779	0.215491	0.125677	0.170584	0.526509	0.093	0.0489653	1.71464	Up	MGI:1306779
Ccl24	ENSMUSG00000004814	0.175653	0.183926	0.179789	0.0460149	0.098	0.00450946	-1.0471	Down	MGI:1928953	cell proliferation
Ccl25	ENSMUSG00000023235	3.40377	2.5756	2.98969	0.277009	0.342	0.0947371	1.32154	Up	MGI:1099448
Ccl3	ENSMUSG00000000982	0.339443	0.158461	0.248952	0.726975	0.125	0.0908719	2.14212	Up	MGI:98260	cell differentiation
Ccl4	ENSMUSG00000018930	0	0.165917	0.0829585	2	0.033	0.066	0	Down	MGI:98261
Ccl7	ENSMUSG00000035373	0.211757	0	0.105879	2	0.053	0.106	0	Up	MGI:99512
Ccl8	ENSMUSG00000009185	0	0.214788	0.107394	2	0.053	0.106	0	Down	MGI:101878	cell differentiation
Ccm2	ENSMUSG00000000378	40.0656	34.151	37.1083	0.159388	0.878	0.139942	1.17319	Up	MGI:2384924	cell differentiation
Ccna1	ENSMUSG00000027793	1.47262	1.42703	1.44983	0.0314452	0.271	0.00852164	1.03195	Up	MGI:108042	cell differentiation	abnormal male fertility
Ccna2	ENSMUSG00000027715	53.118	49.3432	51.2306	0.0736825	0.944	0.0695563	1.0765	Up	MGI:108069	cell proliferation
Ccnb1	ENSMUSG00000041431	20.1327	23.9134	22.023	0.17167	0.733	0.125834	-1.18779	Down	MGI:88302	cell proliferation;cell differentiation
Ccnb1ip1	ENSMUSG00000071470	9.86639	12.9044	11.3854	0.266834	0.557	0.148627	-1.30792	Down	MGI:2685134	cell differentiation
Ccnb2	ENSMUSG00000032218	36.8817	30.9768	33.9293	0.174036	0.854	0.148626	1.19062	Up	MGI:88311
Ccnb3	ENSMUSG00000051592	2.6093	5.0047	3.807	0.629209	0.369	0.232178	-1.91802	Down	MGI:2183443
Ccnc	ENSMUSG00000028252	4.41278	7.09779	5.75528	0.466529	0.422	0.196875	-1.60846	Down	MGI:1858199
Ccnd1	ENSMUSG00000070348	52.4959	53.2987	52.8973	0.0151766	0.948	0.0143874	-1.01529	Down	MGI:88313	cell proliferation;cell differentiation
Ccnd2	ENSMUSG00000000184	43.1648	35.5724	39.3686	0.192854	0.892	0.172026	1.21344	Up	MGI:88314	cell proliferation
Ccndbp1	ENSMUSG00000023572	19.956	24.7276	22.3418	0.213573	0.736	0.15719	-1.23911	Down	MGI:109595
Ccne1	ENSMUSG00000002068	14.2071	13.8932	14.0502	0.0223414	0.609	0.0136059	1.02259	Up	MGI:88316	cell differentiation
Ccne2	ENSMUSG00000028212	9.17713	18.8589	14.018	0.690666	0.609	0.420616	-2.05499	Down	MGI:1329034		abnormal male fertility;abnormal spermatogenesis
Ccng1	ENSMUSG00000020326	17.1739	20.8038	18.9888	0.19116	0.688	0.131518	-1.21136	Down	MGI:102890
Ccng2	ENSMUSG00000029385	8.62517	9.75228	9.18873	0.122662	0.506	0.0620671	-1.13068	Down	MGI:1095734
Ccnh	ENSMUSG00000021548	26.466	28.4561	27.4611	0.0724699	0.795	0.0576136	-1.07519	Down	MGI:1913921
Ccni	ENSMUSG00000063015	58.4102	76.2003	67.3053	0.26432	0.975	0.257712	-1.30457	Down	MGI:1341077
Ccnj	ENSMUSG00000025010	13.4136	14.3471	13.8803	0.0672533	0.606	0.0407555	-1.06959	Down	MGI:2443297
Ccnjl	ENSMUSG00000044707	17.3085	11.2869	14.2977	0.421159	0.613	0.25817	1.5335	Up	MGI:2685723
Ccnl1	ENSMUSG00000027829	18.5872	14.5684	16.5778	0.242421	0.652	0.158058	1.27586	Up	MGI:1922664
Ccno	ENSMUSG00000042417	9.01111	9.35954	9.18533	0.0379333	0.506	0.0191943	-1.03867	Down	MGI:2145534	cell differentiation
Ccnt1	ENSMUSG00000011960	14.3796	16.3798	15.3797	0.130055	0.633	0.0823245	-1.1391	Down	MGI:1328363
Ccnt2	ENSMUSG00000026349	13.3298	17.8141	15.572	0.287973	0.638	0.183727	-1.33641	Down	MGI:1920199	cell differentiation
[truncated: 11,386 more rows]
