# Supplementary material for: Bioinformatics Analysis of Transcriptomic Data Reveals Refined Functional Networks for the Self-Renewal of Mouse Spermatogonial Stem Cells
Source: Stem Cells Int. 2018 Jul 8;2018:5842714. doi: 10.1155/2018/5842714 (PMC6079398; doi:10.1155/2018/5842714)
Supplement: Supplementary Materials — Supplementary data 1: detailed list for gene expression and annotation. Supplementary data 2: detailed results of dynamic screening of candidate genes. Supplementary data 3: detailed information for the refined network. Supplementary data 4: detailed results of functional enrichment analyses. [file 5842714.f1.zip › Supplementary data 2.xlsx]

## Sheet: Sheet1
Cut-off (expression index)	Matched positive genes	Selected genes	All positive genes	All genes	P value	-LogP	Fold change	Significance
0	8	13292	8	13306	1	0	1.00105
0.001	8	13186	8	13306	1	0	1.0091
0.002	8	13062	8	13306	1	0	1.01868
0.003	8	12949	8	13306	1	0	1.02757
0.004	8	12827	8	13306	1	0	1.03734
0.005	8	12727	8	13306	1	0	1.04549
0.006	8	12633	8	13306	1	0	1.05327
0.007	8	12535	8	13306	1	0	1.06151
0.008	8	12429	8	13306	1	0	1.07056
0.009	8	12329	8	13306	1	0	1.07924
0.01	8	12228	8	13306	1	0	1.08816
0.011	8	12136	8	13306	1	0	1.09641
0.012	8	12049	8	13306	1	0	1.10432
0.013	8	11965	8	13306	1	0	1.11208
0.014	8	11871	8	13306	1	0	1.12088
0.015	8	11787	8	13306	0.808598	0.0922672	1.12887
0.016	8	11695	8	13306	0.807846	0.0926714	1.13775
0.017	8	11608	8	13306	0.80717	0.0930348	1.14628
0.018	8	11522	8	13306	0.806538	0.0933753	1.15483
0.019	8	11456	8	13306	0.806077	0.0936236	1.16149
0.02	8	11371	8	13306	0.805516	0.093926	1.17017
0.021	8	11274	8	13306	0.804921	0.0942466	1.18024
0.022	8	11196	8	13306	0.80448	0.0944848	1.18846
0.023	8	11103	8	13306	0.803998	0.094745	1.19841
0.024	8	11020	8	13306	0.80361	0.0949548	1.20744
0.025	8	10945	8	13306	0.803294	0.0951255	1.21571
0.026	8	10856	8	13306	0.802963	0.0953043	1.22568
0.027	8	10788	8	13306	0.802744	0.095423	1.23341
0.028	8	10693	8	13306	0.802487	0.095562	1.24437
0.029	8	10600	8	13306	0.802293	0.0956671	1.25528
0.03	8	10531	8	13306	0.802187	0.0957247	1.26351
0.031	8	10455	8	13306	0.625855	0.203526	1.27269
0.032	8	10371	8	13306	0.624352	0.204571	1.283
0.033	8	10300	8	13306	0.623138	0.205416	1.29184
0.034	8	10224	8	13306	0.621899	0.20628	1.30145
0.035	8	10148	8	13306	0.620724	0.207102	1.31119
0.036	8	10079	8	13306	0.619714	0.207809	1.32017
0.037	8	10000	8	13306	0.618627	0.208571	1.3306
0.038	8	9922	8	13306	0.617629	0.209272	1.34106
0.039	8	9858	8	13306	0.616867	0.209809	1.34977
0.04	8	9799	8	13306	0.616211	0.210271	1.35789
0.041	8	9714	8	13306	0.615347	0.21088	1.36978
0.042	8	9640	8	13306	0.614675	0.211354	1.38029
0.043	8	9576	8	13306	0.614156	0.211721	1.38952
0.044	8	9501	8	13306	0.613623	0.212098	1.40048
0.045	8	9432	8	13306	0.613205	0.212394	1.41073
0.046	8	9363	8	13306	0.61286	0.212639	1.42113
0.047	8	9300	8	13306	0.612609	0.212817	1.43075
0.048	8	9239	8	13306	0.459671	0.337553	1.4402
0.049	8	9178	8	13306	0.457977	0.339157	1.44977
0.05	8	9088	8	13306	0.455588	0.341427	1.46413
0.051	8	9030	8	13306	0.454123	0.342827	1.47353
0.052	8	8956	8	13306	0.452339	0.344536	1.48571
0.053	8	8879	8	13306	0.45059	0.346219	1.49859
0.054	8	8809	8	13306	0.449096	0.34766	1.5105
0.055	8	8740	8	13306	0.447718	0.348995	1.52243
0.056	8	8688	8	13306	0.446743	0.349942	1.53154
0.057	8	8616	8	13306	0.445485	0.351167	1.54434
0.058	8	8554	8	13306	0.44449	0.352138	1.55553
0.059	8	8495	8	13306	0.443621	0.352988	1.56633
0.06	8	8431	8	13306	0.442766	0.353825	1.57822
0.061	8	8370	8	13306	0.44204	0.354539	1.58973
0.062	8	8312	8	13306	0.441429	0.355139	1.60082
0.063	8	8255	8	13306	0.440909	0.355651	1.61187
0.064	8	8196	8	13306	0.440454	0.356099	1.62347
0.065	8	8123	8	13306	0.316677	0.499384	1.63806
0.066	8	8056	8	13306	0.314281	0.502682	1.65169
0.067	8	7983	8	13306	0.311781	0.50615	1.66679
0.068	8	7923	8	13306	0.309817	0.508895	1.67941
0.069	8	7863	8	13306	0.307937	0.511538	1.69223
0.07	8	7799	8	13306	0.306027	0.514241	1.70612
0.071	8	7746	8	13306	0.304522	0.516382	1.71779
0.072	8	7678	8	13306	0.302696	0.518994	1.733
0.073	8	7619	8	13306	0.30121	0.521131	1.74642
0.074	8	7556	8	13306	0.299727	0.523274	1.76098
0.075	8	7509	8	13306	0.298692	0.524776	1.77201
0.076	8	7454	8	13306	0.297562	0.526423	1.78508
0.077	8	7389	8	13306	0.296339	0.528211	1.80078
0.078	8	7327	8	13306	0.295291	0.52975	1.81602
0.079	8	7262	8	13306	0.29432	0.531181	1.83228
0.08	8	7202	8	13306	0.293541	0.532331	1.84754
0.081	8	7140	8	13306	0.29286	0.53334	1.86359
0.082	8	7075	8	13306	0.200742	0.697362	1.88071
0.083	8	7027	8	13306	0.19881	0.701562	1.89355
0.084	8	6981	8	13306	0.197012	0.705507	1.90603
0.085	8	6918	8	13306	0.194638	0.710773	1.92339
0.086	8	6860	8	13306	0.192544	0.715471	1.93965
0.087	8	6792	8	13306	0.190204	0.720779	1.95907
0.088	8	6723	8	13306	0.187963	0.725928	1.97918
0.089	8	6661	8	13306	0.186066	0.730333	1.9976
0.09	8	6608	8	13306	0.184535	0.733922	2.01362
0.091	8	6556	8	13306	0.183116	0.737274	2.02959
0.092	8	6496	8	13306	0.181584	0.740923	2.04834
0.093	8	6439	8	13306	0.180236	0.74416	2.06647
0.094	8	6392	8	13306	0.179204	0.746651	2.08166
0.095	8	6347	8	13306	0.178287	0.748881	2.09642
0.096	8	6290	8	13306	0.177225	0.751475	2.11542
0.097	8	6238	8	13306	0.176356	0.75361	2.13306
0.098	8	6185	8	13306	0.175571	0.755548	2.15133
0.099	8	6130	8	13306	0.174866	0.757295	2.17064
0.1	8	6067	8	13306	0.113196	0.94617	2.19318
0.101	8	6009	8	13306	0.110938	0.95492	2.21435
0.102	8	5953	8	13306	0.108839	0.963217	2.23518
0.103	8	5923	8	13306	0.107747	0.967595	2.2465
0.104	8	5866	8	13306	0.105738	0.975768	2.26833
0.105	8	5819	8	13306	0.104147	0.982352	2.28665
0.106	8	5772	8	13306	0.102617	0.988781	2.30527
0.107	8	5716	8	13306	0.100874	0.99622	2.32785
0.108	8	5655	8	13306	0.0990778	1.00402	2.35296
0.109	8	5595	8	13306	0.0974176	1.01136	2.37819
0.11	8	5544	8	13306	0.0960914	1.01732	2.40007
0.111	8	5490	8	13306	0.0947746	1.02331	2.42368
0.112	8	5446	8	13306	0.0937694	1.02794	2.44326
0.113	8	5405	8	13306	0.0928886	1.03204	2.46179
0.114	8	5354	8	13306	0.0918696	1.03683	2.48524
0.115	8	5319	8	13306	0.0912204	1.03991	2.5016
0.116	8	5276	8	13306	0.0904796	1.04345	2.52199
0.117	8	5214	8	13306	0.0895238	1.04806	2.55198
0.118	8	5170	8	13306	0.0889277	1.05096	2.57369
0.119	8	5133	8	13306	0.0884804	1.05315	2.59225
0.12	8	5085	8	13306	0.0536666	1.2703	2.61672
0.121	8	5037	8	13306	0.0521199	1.283	2.64165
0.122	8	4982	8	13306	0.0504092	1.29749	2.67081
0.123	8	4933	8	13306	0.0489411	1.31033	2.69734	*
0.124	8	4876	8	13306	0.0473006	1.32513	2.72888	*
0.125	8	4833	8	13306	0.0461115	1.33619	2.75316	*
0.126	8	4789	8	13306	0.0449382	1.34738	2.77845	*
0.127	8	4743	8	13306	0.0437593	1.35893	2.8054	*
0.128	8	4699	8	13306	0.0426777	1.3698	2.83167	*
0.129	8	4651	8	13306	0.0415496	1.38143	2.86089	*
0.13	8	4611	8	13306	0.0406514	1.39092	2.88571	*
0.131	8	4569	8	13306	0.0397495	1.40067	2.91223	*
0.132	8	4521	8	13306	0.0387713	1.41149	2.94315	*
0.133	8	4491	8	13306	0.0381885	1.41807	2.96281	*
0.134	8	4437	8	13306	0.0371958	1.42951	2.99887	*
0.135	8	4398	8	13306	0.0365242	1.43742	3.02547	*
0.136	8	4364	8	13306	0.0359701	1.44406	3.04904	*
0.137	8	4325	8	13306	0.0353709	1.45135	3.07653	*
0.138	8	4288	8	13306	0.0348388	1.45794	3.10308	*
0.139	8	4251	8	13306	0.0343424	1.46417	3.13009	*
0.14	8	4199	8	13306	0.0337059	1.47229	3.16885	*
0.141	8	4172	8	13306	0.0334039	1.4762	3.18936	*
0.142	8	4127	8	13306	0.0329444	1.48222	3.22413	*
0.143	8	4086	8	13306	0.032574	1.48713	3.25649	*
0.144	8	4048	8	13306	0.0181071	1.74215	3.28706	*
0.145	8	4011	8	13306	0.0173605	1.76044	3.31738	*
0.146	8	3960	8	13306	0.0163653	1.78607	3.3601	*
0.147	8	3931	8	13306	0.0158169	1.80088	3.38489	*
0.148	8	3890	8	13306	0.0150627	1.8221	3.42057	*
0.149	8	3863	8	13306	0.0145795	1.83626	3.44447	*
0.15	8	3822	8	13306	0.013866	1.85805	3.48142	*
0.151	8	3788	8	13306	0.0132925	1.87639	3.51267	*
0.152	8	3738	8	13306	0.0124789	1.90382	3.55966	*
0.153	8	3696	8	13306	0.0118224	1.9273	3.60011	*
0.154	8	3661	8	13306	0.0112937	1.94716	3.63453	*
0.155	8	3627	8	13306	0.010796	1.96674	3.6686	*
0.156	8	3585	8	13306	0.0102024	1.9913	3.71158	*
0.157	8	3541	8	13306	0.00960534	2.01749	3.7577	**
0.158	7	3512	8	13306	0.0227958	1.64215	3.31513	*
0.159	7	3474	8	13306	0.0217834	1.66188	3.3514	*
0.16	7	3442	8	13306	0.0209535	1.67874	3.38255	*
0.161	7	3414	8	13306	0.0202443	1.6937	3.4103	*
0.162	7	3388	8	13306	0.0195998	1.70775	3.43647	*
0.163	7	3354	8	13306	0.0187772	1.72637	3.4713	*
0.164	7	3316	8	13306	0.0178849	1.74751	3.51108	*
0.165	7	3282	8	13306	0.0171104	1.76674	3.54746	*
0.166	7	3239	8	13306	0.0161629	1.79148	3.59455	*
0.167	7	3218	8	13306	0.0157131	1.80374	3.61801	*
0.168	7	3186	8	13306	0.0150436	1.82265	3.65435	*
0.169	7	3162	8	13306	0.0145542	1.83701	3.68208	*
0.17	7	3127	8	13306	0.0138596	1.85825	3.7233	*
0.171	7	3101	8	13306	0.0133583	1.87425	3.75451	*
0.172	7	3073	8	13306	0.0128322	1.8917	3.78872	*
0.173	7	3040	8	13306	0.0122303	1.91256	3.82985	*
0.174	7	3013	8	13306	0.0117522	1.92988	3.86417	*
0.175	7	2980	8	13306	0.0111854	1.95135	3.90696	*
0.176	7	2940	8	13306	0.0105237	1.97783	3.96012	*
0.177	7	2902	8	13306	0.00992033	2.00347	4.01197	**
0.178	7	2868	8	13306	0.00940104	2.02682	4.05954	**
0.179	7	2835	8	13306	0.00891526	2.04987	4.10679	**
0.18	7	2803	8	13306	0.00846107	2.07257	4.15367	**
0.181	7	2768	8	13306	0.007983	2.09783	4.2062	**
0.182	7	2726	8	13306	0.0074346	2.12874	4.271	**
0.183	7	2702	8	13306	0.00713337	2.14671	4.30894	**
0.184	7	2673	8	13306	0.00678096	2.16871	4.35569	**
0.185	7	2647	8	13306	0.00647559	2.18872	4.39847	**
0.186	7	2613	8	13306	0.00609111	2.2153	4.4557	**
0.187	7	2588	8	13306	0.00581892	2.23516	4.49874	**
0.188	7	2564	8	13306	0.00556588	2.25447	4.54085	**
0.189	7	2536	8	13306	0.00528068	2.27731	4.59099	**
0.19	7	2507	8	13306	0.00499647	2.30134	4.6441	**
0.191	7	2479	8	13306	0.00473263	2.3249	4.69655	**
0.192	7	2456	8	13306	0.00452352	2.34452	4.74053	**
0.193	7	2429	8	13306	0.00428663	2.36788	4.79323	**
0.194	7	2405	8	13306	0.0040837	2.38895	4.84106	**
0.195	7	2380	8	13306	0.00387981	2.41119	4.89191	**
0.196	7	2347	8	13306	0.00362212	2.44104	4.96069	**
0.197	6	2326	8	13306	0.0111416	1.95305	4.29041	*
0.198	6	2307	8	13306	0.01077	1.96779	4.32575	*
0.199	6	2288	8	13306	0.0104067	1.98269	4.36167	*
0.2	6	2259	8	13306	0.00986835	2.00576	4.41766	**
0.201	6	2238	8	13306	0.00949043	2.02271	4.45912	**
0.202	6	2213	8	13306	0.00905345	2.04319	4.50949	**
0.203	6	2196	8	13306	0.00876424	2.05729	4.5444	**
0.204	6	2170	8	13306	0.00833417	2.07914	4.59885	**
0.205	6	2147	8	13306	0.00796594	2.09876	4.64811	**
0.206	6	2119	8	13306	0.00753288	2.12304	4.70953	**
0.207	6	2101	8	13306	0.0072632	2.13887	4.74988	**
0.208	6	2081	8	13306	0.00697143	2.15668	4.79553	**
0.209	6	2049	8	13306	0.00652161	2.18565	4.87042	**
0.21	6	2028	8	13306	0.00623759	2.20498	4.92086	**
0.211	6	2006	8	13306	0.0059494	2.22553	4.97483	**
0.212	6	1976	8	13306	0.00557154	2.25403	5.05035	**
0.213	6	1958	8	13306	0.00535306	2.2714	5.09678	**
0.214	6	1939	8	13306	0.00512903	2.28996	5.14673	**
0.215	6	1914	8	13306	0.00484441	2.31476	5.21395	**
0.216	6	1890	8	13306	0.00458181	2.33896	5.28016	**
0.217	6	1873	8	13306	0.004402	2.35635	5.32808	**
0.218	6	1844	8	13306	0.00410689	2.38649	5.41188	**
0.219	6	1833	8	13306	0.00399872	2.39808	5.44435	**
0.22	6	1816	8	13306	0.00383556	2.41617	5.49532	**
0.221	6	1801	8	13306	0.00369558	2.43232	5.54109	**
0.222	6	1788	8	13306	0.00357725	2.44645	5.58138	**
0.223	6	1771	8	13306	0.00342663	2.46513	5.63495	**
0.224	6	1741	8	13306	0.00317199	2.49867	5.73205	**
0.225	6	1725	8	13306	0.00304189	2.51686	5.78522	**
0.226	6	1709	8	13306	0.00291568	2.53526	5.83938	**
0.227	6	1679	8	13306	0.00268927	2.57037	5.94372	**
0.228	6	1663	8	13306	0.00257386	2.58941	6.0009	**
0.229	6	1653	8	13306	0.00250358	2.60144	6.03721	**
0.23	6	1641	8	13306	0.0024211	2.61599	6.08135	**
0.231	6	1626	8	13306	0.00232079	2.63436	6.13745	**
0.232	6	1616	8	13306	0.00225562	2.64673	6.17543	**
0.233	6	1601	8	13306	0.00216037	2.66547	6.23329	**
0.234	6	1585	8	13306	0.00206205	2.6857	6.29621	**
0.235	6	1565	8	13306	0.0019438	2.71135	6.37668	**
0.236	6	1542	8	13306	0.00181403	2.74135	6.47179	**
0.237	6	1532	8	13306	0.00175964	2.75458	6.51403	**
0.238	6	1517	8	13306	0.00168032	2.77461	6.57844	**
0.239	6	1507	8	13306	0.00162892	2.7881	6.6221	**
0.24	6	1487	8	13306	0.00152961	2.81542	6.71116	**
0.241	6	1469	8	13306	0.00144412	2.8404	6.7934	**
0.242	6	1455	8	13306	0.00138011	2.86009	6.85876	**
0.243	6	1443	8	13306	0.00132694	2.87715	6.9158	**
0.244	6	1435	8	13306	0.00129234	2.88862	6.95436	**
0.245	6	1422	8	13306	0.00123756	2.90743	7.01793	**
0.246	6	1411	8	13306	0.00119257	2.92351	7.07264	**
0.247	6	1394	8	13306	0.00112545	2.94867	7.1589	**
0.248	6	1376	8	13306	0.0010575	2.97572	7.25254	**
0.249	6	1355	8	13306	0.000982137	3.00783	7.36494	***
0.25	6	1339	8	13306	0.000927475	3.0327	7.45295	***
0.251	6	1331	8	13306	0.000901014	3.04527	7.49775	***
0.252	6	1321	8	13306	0.000868739	3.06111	7.5545	***
0.253	6	1304	8	13306	0.000815873	3.08838	7.65299	***
0.254	6	1294	8	13306	0.000785927	3.10462	7.71213	***
0.255	6	1287	8	13306	0.000765462	3.11608	7.75408	***
0.256	6	1275	8	13306	0.000731317	3.13589	7.82706	***
0.257	6	1258	8	13306	0.000684925	3.16436	7.93283	***
0.258	6	1246	8	13306	0.000653541	3.18473	8.00923	***
0.259	6	1239	8	13306	0.000635743	3.19672	8.05448	***
0.26	6	1232	8	13306	0.000618314	3.20879	8.10024	***
0.261	6	1221	8	13306	0.00059166	3.22793	8.17322	***
0.262	6	1202	8	13306	0.000547681	3.26147	8.30241	***
0.263	6	1191	8	13306	0.000523381	3.28118	8.37909	***
0.264	6	1174	8	13306	0.000487448	3.31207	8.50043	***
0.265	6	1155	8	13306	0.000449543	3.34723	8.64026	***
0.266	6	1133	8	13306	0.000408508	3.3888	8.80803	***
0.267	6	1119	8	13306	0.000383926	3.41575	8.91823	***
0.268	5	1106	8	13306	0.00204687	2.68891	7.51921	**
0.269	5	1091	8	13306	0.00193512	2.71329	7.62259	**
0.27	5	1079	8	13306	0.0018489	2.73309	7.70737	**
0.271	5	1068	8	13306	0.00177229	2.75146	7.78675	**
0.272	5	1062	8	13306	0.00173148	2.76158	7.83074	**
0.273	5	1047	8	13306	0.00163239	2.78718	7.94293	**
0.274	5	1038	8	13306	0.00157492	2.80274	8.0118	**
0.275	5	1030	8	13306	0.00152506	2.81671	8.07403	**
0.276	5	1019	8	13306	0.00145837	2.83613	8.16119	**
0.277	5	1008	8	13306	0.00139381	2.8558	8.25025	**
0.278	5	992	8	13306	0.00130359	2.88486	8.38332	**
0.279	5	980	8	13306	0.00123875	2.90702	8.48597	**
0.28	5	967	8	13306	0.00117117	2.93138	8.60005	**
0.281	5	959	8	13306	0.00113093	2.94657	8.67179	**
0.282	5	947	8	13306	0.00107246	2.96962	8.78168	**
0.283	5	937	8	13306	0.00102543	2.98909	8.8754	**
0.284	5	931	8	13306	0.000997942	3.00089	8.9326	***
0.285	4	922	8	13306	0.00576818	2.23896	7.21584	**
0.286	4	910	8	13306	0.00552179	2.25792	7.31099	**
0.287	4	899	8	13306	0.00530202	2.27556	7.40044	**
0.288	4	886	8	13306	0.0050497	2.29673	7.50903	**
0.289	4	875	8	13306	0.00484241	2.31494	7.60343	**
0.29	4	867	8	13306	0.00469519	2.32835	7.67359	**
0.291	4	860	8	13306	0.00456879	2.3402	7.73605	**
0.292	4	851	8	13306	0.00440959	2.3556	7.81786	**
0.293	4	846	8	13306	0.00432273	2.36424	7.86407	**
0.294	4	839	8	13306	0.00420302	2.37644	7.92968	**
0.295	3	829	8	13306	0.0234421	1.63	6.019	*
0.296	3	820	8	13306	0.0228158	1.64176	6.08506	*
0.297	3	808	8	13306	0.0219944	1.65769	6.17543	*
0.298	3	800	8	13306	0.0214556	1.66846	6.23719	*
0.299	3	789	8	13306	0.0207263	1.68348	6.32414	*
0.3	3	778	8	13306	0.0200102	1.69875	6.41356	*
0.301	3	768	8	13306	0.0193709	1.71285	6.49707	*
0.302	3	759	8	13306	0.0188049	1.72573	6.57411	*
0.303	3	749	8	13306	0.0181866	1.74025	6.66188	*
0.304	3	737	8	13306	0.0174593	1.75797	6.77035	*
0.305	3	731	8	13306	0.0171016	1.76696	6.82592	*
0.306	3	718	8	13306	0.0163404	1.78674	6.94951	*
0.307	3	712	8	13306	0.0159954	1.796	7.00808	*
0.308	3	703	8	13306	0.0154854	1.81008	7.0978	*
0.309	3	697	8	13306	0.0151504	1.81957	7.1589	*
0.31	3	686	8	13306	0.0145467	1.83724	7.27369	*
0.311	3	678	8	13306	0.0141161	1.85029	7.35951	*
0.312	3	671	8	13306	0.0137451	1.86185	7.43629	*
0.313	3	661	8	13306	0.0132246	1.87862	7.54879	*
0.314	3	655	8	13306	0.0129176	1.88882	7.61794	*
0.315	3	646	8	13306	0.0124647	1.90432	7.72407	*
0.316	3	635	8	13306	0.0119233	1.9236	7.85787	*
0.317	3	629	8	13306	0.0116336	1.93429	7.93283	*
0.318	3	622	8	13306	0.0113007	1.94689	8.02211	*
0.319	3	610	8	13306	0.0107426	1.96889	8.17992	*
0.32	3	603	8	13306	0.0104244	1.98195	8.27488	*
0.321	3	597	8	13306	0.0101559	1.99328	8.35804	*
0.322	3	591	8	13306	0.00989145	2.00474	8.44289	**
0.323	3	584	8	13306	0.00958786	2.01828	8.54409	**
0.324	3	580	8	13306	0.00941679	2.0261	8.60302	**
0.325	3	572	8	13306	0.00907991	2.04192	8.72334	**
0.326	3	569	8	13306	0.00895538	2.04792	8.76933	**
0.327	3	565	8	13306	0.00879087	2.05597	8.83142	**
0.328	3	558	8	13306	0.00850717	2.07021	8.9422	**
0.329	3	549	8	13306	0.00815023	2.08883	9.0888	**
0.33	3	542	8	13306	0.00787868	2.10355	9.20618	**
0.331	3	536	8	13306	0.00765013	2.11633	9.30924	**
0.332	3	532	8	13306	0.00749991	2.12494	9.37923	**
0.333	2	526	8	13306	0.0533515	1.27285	6.32414
0.334	2	521	8	13306	0.0524801	1.28001	6.38484
0.335	2	515	8	13306	0.0514409	1.28869	6.45922
0.336	2	506	8	13306	0.0498954	1.30194	6.57411	*
0.337	2	504	8	13306	0.0495541	1.30492	6.6002	*
0.338	2	500	8	13306	0.0488741	1.31092	6.653	*
0.339	2	493	8	13306	0.0476918	1.32156	6.74746	*
0.34	2	482	8	13306	0.0458543	1.33862	6.90145	*
0.341	2	472	8	13306	0.044206	1.35452	7.04767	*
0.342	2	468	8	13306	0.0435527	1.36099	7.10791	*
0.343	2	465	8	13306	0.043065	1.36588	7.15376	*
0.344	2	460	8	13306	0.0422565	1.37411	7.23152	*
0.345	2	456	8	13306	0.0416137	1.38076	7.29496	*
0.346	2	453	8	13306	0.0411339	1.3858	7.34327	*
0.347	2	448	8	13306	0.0403387	1.39428	7.42522	*
0.348	2	442	8	13306	0.039392	1.40459	7.52602	*
0.349	2	441	8	13306	0.039235	1.40633	7.54308	*
0.35	2	436	8	13306	0.0384535	1.41506	7.62959	*
0.351	2	433	8	13306	0.0379873	1.42036	7.68245	*
0.352	2	423	8	13306	0.0364488	1.43832	7.86407	*
0.353	2	420	8	13306	0.0359918	1.4438	7.92024	*
0.354	2	411	8	13306	0.0346338	1.4605	8.09367	*
0.355	2	404	8	13306	0.0335912	1.47377	8.23391	*
0.356	2	399	8	13306	0.0328539	1.48341	8.33709	*
0.357	2	393	8	13306	0.0319773	1.49516	8.46438	*
0.358	2	384	8	13306	0.0306795	1.51315	8.66276	*
0.359	2	375	8	13306	0.0294024	1.53162	8.87067	*
0.36	2	375	8	13306	0.0294024	1.53162	8.87067	*
0.361	2	373	8	13306	0.0291215	1.53579	8.91823	*
0.362	2	371	8	13306	0.0288416	1.53998	8.96631	*
0.363	2	368	8	13306	0.0284237	1.54632	9.0394	*
0.364	2	366	8	13306	0.0281464	1.55058	9.0888	*
0.365	2	365	8	13306	0.0280082	1.55271	9.1137	*
0.366	2	359	8	13306	0.0271844	1.56568	9.26602	*
0.367	2	352	8	13306	0.0262355	1.58111	9.45028	*
0.368	1	345	8	13306	0.206237	0.685634	4.82101
0.369	1	340	8	13306	0.203616	0.691187	4.89191
0.37	1	337	8	13306	0.20204	0.694564	4.93546
0.371	1	335	8	13306	0.200986	0.696833	4.96493
0.372	1	333	8	13306	0.199932	0.699118	4.99474
0.373	1	330	8	13306	0.198347	0.702575	5.04015
0.374	1	326	8	13306	0.196228	0.707239	5.10199
0.375	1	325	8	13306	0.195697	0.708415	5.11769
0.376	1	323	8	13306	0.194635	0.71078	5.14938
0.377	1	321	8	13306	0.193571	0.71316	5.18146
0.378	1	319	8	13306	0.192505	0.715558	5.21395
0.379	1	317	8	13306	0.191438	0.717972	5.24685
0.38	1	312	8	13306	0.188763	0.724083	5.33093
0.381	1	310	8	13306	0.18769	0.726558	5.36532
0.382	1	305	8	13306	0.185002	0.732824	5.45328
0.383	1	303	8	13306	0.183924	0.735362	5.48927
0.384	1	301	8	13306	0.182844	0.73792	5.52575
0.385	1	298	8	13306	0.181221	0.741791	5.58138
0.386	1	292	8	13306	0.177965	0.749665	5.69606
0.387	1	290	8	13306	0.176877	0.75233	5.73534
0.388	1	290	8	13306	0.176877	0.75233	5.73534
0.389	1	287	8	13306	0.175241	0.756365	5.7953
0.39	1	280	8	13306	0.17141	0.765964	5.94018
0.391	1	279	8	13306	0.170861	0.767357	5.96147
0.392	1	278	8	13306	0.170312	0.768756	5.98291
0.393	1	276	8	13306	0.169212	0.771569	6.02627
0.394	1	273	8	13306	0.167559	0.775832	6.09249
0.395	1	272	8	13306	0.167007	0.777265	6.11489
0.396	1	269	8	13306	0.16535	0.781597	6.18309
0.397	1	266	8	13306	0.163688	0.785982	6.25282
0.398	1	264	8	13306	0.162579	0.788936	6.30019
0.399	1	262	8	13306	0.161468	0.791915	6.34828
0.4	1	262	8	13306	0.161468	0.791915	6.34828
0.401	1	260	8	13306	0.160355	0.794918	6.39712
0.402	1	255	8	13306	0.157565	0.802539	6.52255
0.403	1	252	8	13306	0.155887	0.80719	6.6002
0.404	1	242	8	13306	0.150265	0.823142	6.87293
0.405	1	239	8	13306	0.14857	0.828068	6.95921
0.406	1	237	8	13306	0.147438	0.83139	7.01793
0.407	1	234	8	13306	0.145737	0.836429	7.10791
0.408	1	231	8	13306	0.144033	0.841539	7.20022
0.409	1	227	8	13306	0.141754	0.848465	7.32709
0.41	1	226	8	13306	0.141183	0.850218	7.35951
0.411	1	223	8	13306	0.139468	0.855525	7.45852
0.412	1	221	8	13306	0.138323	0.859106	7.52602
0.413	1	218	8	13306	0.136602	0.864544	7.62959
0.414	1	216	8	13306	0.135452	0.868214	7.70023
0.415	0	210	8	13306	1	0	0
0.416	0	209	8	13306	1	0	0
0.417	0	208	8	13306	1	0	0
0.418	0	206	8	13306	1	0	0
0.419	0	204	8	13306	1	0	0
0.42	0	199	8	13306	1	0	0
0.421	0	196	8	13306	1	0	0
0.422	0	194	8	13306	1	0	0
0.423	0	193	8	13306	1	0	0
0.424	0	192	8	13306	1	0	0
0.425	0	190	8	13306	1	0	0
0.426	0	188	8	13306	1	0	0
0.427	0	186	8	13306	1	0	0
0.428	0	185	8	13306	1	0	0
0.429	0	184	8	13306	1	0	0
0.43	0	181	8	13306	1	0	0
0.431	0	178	8	13306	1	0	0
0.432	0	177	8	13306	1	0	0
0.433	0	174	8	13306	1	0	0
0.434	0	173	8	13306	1	0	0
0.435	0	171	8	13306	1	0	0
0.436	0	168	8	13306	1	0	0
0.437	0	168	8	13306	1	0	0
0.438	0	166	8	13306	1	0	0
0.439	0	165	8	13306	1	0	0
0.44	0	162	8	13306	1	0	0
0.441	0	162	8	13306	1	0	0
0.442	0	162	8	13306	1	0	0
0.443	0	158	8	13306	1	0	0
0.444	0	157	8	13306	1	0	0
0.445	0	154	8	13306	1	0	0
0.446	0	152	8	13306	1	0	0
0.447	0	151	8	13306	1	0	0
0.448	0	148	8	13306	1	0	0
0.449	0	146	8	13306	1	0	0
0.45	0	146	8	13306	1	0	0
0.451	0	145	8	13306	1	0	0
0.452	0	143	8	13306	1	0	0
0.453	0	142	8	13306	1	0	0
0.454	0	140	8	13306	1	0	0
0.455	0	139	8	13306	1	0	0
0.456	0	138	8	13306	1	0	0
0.457	0	137	8	13306	1	0	0
0.458	0	134	8	13306	1	0	0
0.459	0	131	8	13306	1	0	0
0.46	0	130	8	13306	1	0	0
0.461	0	127	8	13306	1	0	0
0.462	0	124	8	13306	1	0	0
0.463	0	124	8	13306	1	0	0
0.464	0	122	8	13306	1	0	0
0.465	0	122	8	13306	1	0	0
0.466	0	120	8	13306	1	0	0
0.467	0	119	8	13306	1	0	0
0.468	0	117	8	13306	1	0	0
0.469	0	116	8	13306	1	0	0
0.47	0	114	8	13306	1	0	0
0.471	0	112	8	13306	1	0	0
0.472	0	112	8	13306	1	0	0
0.473	0	112	8	13306	1	0	0
0.474	0	112	8	13306	1	0	0
0.475	0	112	8	13306	1	0	0
0.476	0	111	8	13306	1	0	0
0.477	0	110	8	13306	1	0	0
0.478	0	109	8	13306	1	0	0
0.479	0	109	8	13306	1	0	0
0.48	0	109	8	13306	1	0	0
0.481	0	107	8	13306	1	0	0
0.482	0	105	8	13306	1	0	0
0.483	0	105	8	13306	1	0	0
0.484	0	104	8	13306	1	0	0
0.485	0	103	8	13306	1	0	0
0.486	0	103	8	13306	1	0	0
0.487	0	102	8	13306	1	0	0
0.488	0	102	8	13306	1	0	0
0.489	0	101	8	13306	1	0	0
0.49	0	100	8	13306	1	0	0
0.491	0	100	8	13306	1	0	0
0.492	0	100	8	13306	1	0	0
0.493	0	99	8	13306	1	0	0
0.494	0	97	8	13306	1	0	0
0.495	0	97	8	13306	1	0	0
0.496	0	97	8	13306	1	0	0
0.497	0	96	8	13306	1	0	0
0.498	0	96	8	13306	1	0	0
0.499	0	95	8	13306	1	0	0
0.5	0	95	8	13306	1	0	0
0.501	0	92	8	13306	1	0	0
0.502	0	92	8	13306	1	0	0
0.503	0	92	8	13306	1	0	0
0.504	0	90	8	13306	1	0	0
0.505	0	90	8	13306	1	0	0
0.506	0	88	8	13306	1	0	0
0.507	0	88	8	13306	1	0	0
0.508	0	86	8	13306	1	0	0
0.509	0	86	8	13306	1	0	0
0.51	0	86	8	13306	1	0	0
0.511	0	86	8	13306	1	0	0
0.512	0	85	8	13306	1	0	0
0.513	0	84	8	13306	1	0	0
0.514	0	84	8	13306	1	0	0
0.515	0	82	8	13306	1	0	0
0.516	0	80	8	13306	1	0	0
0.517	0	80	8	13306	1	0	0
0.518	0	79	8	13306	1	0	0
0.519	0	78	8	13306	1	0	0
0.52	0	78	8	13306	1	0	0
0.521	0	78	8	13306	1	0	0
0.522	0	78	8	13306	1	0	0
0.523	0	78	8	13306	1	0	0
0.524	0	78	8	13306	1	0	0
0.525	0	77	8	13306	1	0	0
0.526	0	77	8	13306	1	0	0
0.527	0	75	8	13306	1	0	0
0.528	0	75	8	13306	1	0	0
0.529	0	75	8	13306	1	0	0
0.53	0	74	8	13306	1	0	0
0.531	0	74	8	13306	1	0	0
0.532	0	74	8	13306	1	0	0
0.533	0	74	8	13306	1	0	0
0.534	0	71	8	13306	1	0	0
0.535	0	70	8	13306	1	0	0
0.536	0	68	8	13306	1	0	0
0.537	0	67	8	13306	1	0	0
0.538	0	66	8	13306	1	0	0
0.539	0	65	8	13306	1	0	0
0.54	0	64	8	13306	1	0	0
0.541	0	63	8	13306	1	0	0
0.542	0	61	8	13306	1	0	0
0.543	0	61	8	13306	1	0	0
0.544	0	61	8	13306	1	0	0
0.545	0	61	8	13306	1	0	0
0.546	0	60	8	13306	1	0	0
0.547	0	60	8	13306	1	0	0
0.548	0	60	8	13306	1	0	0
0.549	0	58	8	13306	1	0	0
0.55	0	57	8	13306	1	0	0
0.551	0	56	8	13306	1	0	0
0.552	0	55	8	13306	1	0	0
0.553	0	55	8	13306	1	0	0
0.554	0	55	8	13306	1	0	0
0.555	0	55	8	13306	1	0	0
0.556	0	55	8	13306	1	0	0
0.557	0	54	8	13306	1	0	0
0.558	0	54	8	13306	1	0	0
0.559	0	54	8	13306	1	0	0
0.56	0	54	8	13306	1	0	0
0.561	0	54	8	13306	1	0	0
0.562	0	54	8	13306	1	0	0
0.563	0	54	8	13306	1	0	0
0.564	0	53	8	13306	1	0	0
0.565	0	53	8	13306	1	0	0
0.566	0	53	8	13306	1	0	0
0.567	0	53	8	13306	1	0	0
0.568	0	53	8	13306	1	0	0
0.569	0	53	8	13306	1	0	0
0.57	0	52	8	13306	1	0	0
0.571	0	50	8	13306	1	0	0
0.572	0	50	8	13306	1	0	0
0.573	0	50	8	13306	1	0	0
0.574	0	50	8	13306	1	0	0
0.575	0	49	8	13306	1	0	0
0.576	0	49	8	13306	1	0	0
0.577	0	49	8	13306	1	0	0
0.578	0	49	8	13306	1	0	0
0.579	0	48	8	13306	1	0	0
0.58	0	48	8	13306	1	0	0
0.581	0	48	8	13306	1	0	0
0.582	0	47	8	13306	1	0	0
0.583	0	46	8	13306	1	0	0
0.584	0	46	8	13306	1	0	0
0.585	0	45	8	13306	1	0	0
0.586	0	44	8	13306	1	0	0
0.587	0	44	8	13306	1	0	0
0.588	0	44	8	13306	1	0	0
0.589	0	44	8	13306	1	0	0
0.59	0	44	8	13306	1	0	0
0.591	0	44	8	13306	1	0	0
0.592	0	44	8	13306	1	0	0
0.593	0	42	8	13306	1	0	0
0.594	0	41	8	13306	1	0	0
0.595	0	41	8	13306	1	0	0
0.596	0	41	8	13306	1	0	0
0.597	0	39	8	13306	1	0	0
0.598	0	39	8	13306	1	0	0
0.599	0	38	8	13306	1	0	0
0.6	0	37	8	13306	1	0	0
0.601	0	36	8	13306	1	0	0
0.602	0	36	8	13306	1	0	0
0.603	0	35	8	13306	1	0	0
0.604	0	35	8	13306	1	0	0
0.605	0	35	8	13306	1	0	0
0.606	0	34	8	13306	1	0	0
0.607	0	33	8	13306	1	0	0
0.608	0	33	8	13306	1	0	0
0.609	0	33	8	13306	1	0	0
0.61	0	33	8	13306	1	0	0
0.611	0	33	8	13306	1	0	0
0.612	0	33	8	13306	1	0	0
0.613	0	33	8	13306	1	0	0
0.614	0	33	8	13306	1	0	0
0.615	0	33	8	13306	1	0	0
0.616	0	33	8	13306	1	0	0
0.617	0	33	8	13306	1	0	0
0.618	0	32	8	13306	1	0	0
0.619	0	32	8	13306	1	0	0
0.62	0	32	8	13306	1	0	0
0.621	0	32	8	13306	1	0	0
0.622	0	32	8	13306	1	0	0
0.623	0	32	8	13306	1	0	0
0.624	0	32	8	13306	1	0	0
0.625	0	31	8	13306	1	0	0
0.626	0	30	8	13306	1	0	0
0.627	0	30	8	13306	1	0	0
0.628	0	30	8	13306	1	0	0
0.629	0	30	8	13306	1	0	0
0.63	0	30	8	13306	1	0	0
0.631	0	30	8	13306	1	0	0
0.632	0	30	8	13306	1	0	0
0.633	0	30	8	13306	1	0	0
0.634	0	30	8	13306	1	0	0
0.635	0	30	8	13306	1	0	0
0.636	0	30	8	13306	1	0	0
0.637	0	30	8	13306	1	0	0
0.638	0	30	8	13306	1	0	0
0.639	0	29	8	13306	1	0	0
0.64	0	29	8	13306	1	0	0
0.641	0	29	8	13306	1	0	0
0.642	0	29	8	13306	1	0	0
0.643	0	29	8	13306	1	0	0
0.644	0	29	8	13306	1	0	0
0.645	0	28	8	13306	1	0	0
0.646	0	27	8	13306	1	0	0
0.647	0	27	8	13306	1	0	0
0.648	0	27	8	13306	1	0	0
0.649	0	27	8	13306	1	0	0
0.65	0	27	8	13306	1	0	0
0.651	0	27	8	13306	1	0	0
0.652	0	27	8	13306	1	0	0
0.653	0	27	8	13306	1	0	0
0.654	0	27	8	13306	1	0	0
0.655	0	25	8	13306	1	0	0
0.656	0	24	8	13306	1	0	0
0.657	0	24	8	13306	1	0	0
0.658	0	24	8	13306	1	0	0
0.659	0	24	8	13306	1	0	0
0.66	0	23	8	13306	1	0	0
0.661	0	23	8	13306	1	0	0
0.662	0	23	8	13306	1	0	0
0.663	0	23	8	13306	1	0	0
0.664	0	23	8	13306	1	0	0
0.665	0	23	8	13306	1	0	0
0.666	0	22	8	13306	1	0	0
0.667	0	22	8	13306	1	0	0
0.668	0	22	8	13306	1	0	0
0.669	0	22	8	13306	1	0	0
0.67	0	22	8	13306	1	0	0
0.671	0	22	8	13306	1	0	0
0.672	0	20	8	13306	1	0	0
0.673	0	20	8	13306	1	0	0
0.674	0	20	8	13306	1	0	0
0.675	0	20	8	13306	1	0	0
0.676	0	20	8	13306	1	0	0
0.677	0	20	8	13306	1	0	0
0.678	0	20	8	13306	1	0	0
0.679	0	20	8	13306	1	0	0
0.68	0	19	8	13306	1	0	0
0.681	0	19	8	13306	1	0	0
0.682	0	19	8	13306	1	0	0
0.683	0	19	8	13306	1	0	0
0.684	0	19	8	13306	1	0	0
0.685	0	19	8	13306	1	0	0
0.686	0	19	8	13306	1	0	0
0.687	0	18	8	13306	1	0	0
0.688	0	18	8	13306	1	0	0
0.689	0	17	8	13306	1	0	0
0.69	0	17	8	13306	1	0	0
0.691	0	17	8	13306	1	0	0
0.692	0	16	8	13306	1	0	0
0.693	0	16	8	13306	1	0	0
0.694	0	16	8	13306	1	0	0
0.695	0	16	8	13306	1	0	0
0.696	0	16	8	13306	1	0	0
0.697	0	15	8	13306	1	0	0
0.698	0	15	8	13306	1	0	0
0.699	0	15	8	13306	1	0	0
0.7	0	15	8	13306	1	0	0
0.701	0	15	8	13306	1	0	0
0.702	0	15	8	13306	1	0	0
0.703	0	14	8	13306	1	0	0
0.704	0	14	8	13306	1	0	0
0.705	0	14	8	13306	1	0	0
0.706	0	14	8	13306	1	0	0
0.707	0	14	8	13306	1	0	0
0.708	0	14	8	13306	1	0	0
0.709	0	14	8	13306	1	0	0
0.71	0	14	8	13306	1	0	0
0.711	0	14	8	13306	1	0	0
0.712	0	14	8	13306	1	0	0
0.713	0	14	8	13306	1	0	0
0.714	0	14	8	13306	1	0	0
0.715	0	14	8	13306	1	0	0
0.716	0	14	8	13306	1	0	0
0.717	0	14	8	13306	1	0	0
0.718	0	14	8	13306	1	0	0
0.719	0	14	8	13306	1	0	0
0.72	0	14	8	13306	1	0	0
0.721	0	13	8	13306	1	0	0
0.722	0	13	8	13306	1	0	0
0.723	0	13	8	13306	1	0	0
0.724	0	13	8	13306	1	0	0
0.725	0	13	8	13306	1	0	0
0.726	0	13	8	13306	1	0	0
0.727	0	13	8	13306	1	0	0
0.728	0	12	8	13306	1	0	0
0.729	0	12	8	13306	1	0	0
0.73	0	12	8	13306	1	0	0
0.731	0	12	8	13306	1	0	0
0.732	0	12	8	13306	1	0	0
0.733	0	12	8	13306	1	0	0
0.734	0	12	8	13306	1	0	0
0.735	0	12	8	13306	1	0	0
0.736	0	12	8	13306	1	0	0
0.737	0	12	8	13306	1	0	0
0.738	0	12	8	13306	1	0	0
0.739	0	12	8	13306	1	0	0
0.74	0	12	8	13306	1	0	0
0.741	0	11	8	13306	1	0	0
0.742	0	11	8	13306	1	0	0
0.743	0	11	8	13306	1	0	0
0.744	0	10	8	13306	1	0	0
0.745	0	10	8	13306	1	0	0
0.746	0	10	8	13306	1	0	0
0.747	0	10	8	13306	1	0	0
0.748	0	10	8	13306	1	0	0
0.749	0	10	8	13306	1	0	0
0.75	0	10	8	13306	1	0	0
0.751	0	10	8	13306	1	0	0
0.752	0	10	8	13306	1	0	0
0.753	0	9	8	13306	1	0	0
0.754	0	9	8	13306	1	0	0
0.755	0	9	8	13306	1	0	0
0.756	0	9	8	13306	1	0	0
0.757	0	9	8	13306	1	0	0
0.758	0	9	8	13306	1	0	0
0.759	0	9	8	13306	1	0	0
0.76	0	9	8	13306	1	0	0
0.761	0	9	8	13306	1	0	0
0.762	0	9	8	13306	1	0	0
0.763	0	9	8	13306	1	0	0
0.764	0	9	8	13306	1	0	0
0.765	0	9	8	13306	1	0	0
0.766	0	8	8	13306	1	0	0
0.767	0	7	8	13306	1	0	0
0.768	0	6	8	13306	1	0	0
0.769	0	6	8	13306	1	0	0
0.77	0	6	8	13306	1	0	0
0.771	0	6	8	13306	1	0	0
0.772	0	6	8	13306	1	0	0
0.773	0	6	8	13306	1	0	0
0.774	0	6	8	13306	1	0	0
0.775	0	6	8	13306	1	0	0
0.776	0	6	8	13306	1	0	0
0.777	0	6	8	13306	1	0	0
0.778	0	6	8	13306	1	0	0
0.779	0	6	8	13306	1	0	0
0.78	0	6	8	13306	1	0	0
0.781	0	6	8	13306	1	0	0
0.782	0	6	8	13306	1	0	0
0.783	0	6	8	13306	1	0	0
0.784	0	6	8	13306	1	0	0
0.785	0	6	8	13306	1	0	0
0.786	0	6	8	13306	1	0	0
0.787	0	6	8	13306	1	0	0
0.788	0	6	8	13306	1	0	0
0.789	0	6	8	13306	1	0	0
0.79	0	6	8	13306	1	0	0
0.791	0	6	8	13306	1	0	0
0.792	0	6	8	13306	1	0	0
0.793	0	5	8	13306	1	0	0
0.794	0	5	8	13306	1	0	0
0.795	0	5	8	13306	1	0	0
0.796	0	5	8	13306	1	0	0
0.797	0	5	8	13306	1	0	0
0.798	0	5	8	13306	1	0	0
0.799	0	5	8	13306	1	0	0
0.8	0	5	8	13306	1	0	0
0.801	0	5	8	13306	1	0	0
0.802	0	5	8	13306	1	0	0
0.803	0	5	8	13306	1	0	0
0.804	0	5	8	13306	1	0	0
0.805	0	5	8	13306	1	0	0
0.806	0	5	8	13306	1	0	0
0.807	0	5	8	13306	1	0	0
0.808	0	5	8	13306	1	0	0
0.809	0	5	8	13306	1	0	0
0.81	0	5	8	13306	1	0	0
0.811	0	5	8	13306	1	0	0
0.812	0	5	8	13306	1	0	0
0.813	0	5	8	13306	1	0	0
0.814	0	4	8	13306	1	0	0
0.815	0	4	8	13306	1	0	0
0.816	0	4	8	13306	1	0	0
0.817	0	4	8	13306	1	0	0
0.818	0	4	8	13306	1	0	0
0.819	0	4	8	13306	1	0	0
0.82	0	4	8	13306	1	0	0
0.821	0	4	8	13306	1	0	0
0.822	0	4	8	13306	1	0	0
0.823	0	4	8	13306	1	0	0
0.824	0	4	8	13306	1	0	0
0.825	0	4	8	13306	1	0	0
0.826	0	4	8	13306	1	0	0
0.827	0	4	8	13306	1	0	0
0.828	0	4	8	13306	1	0	0
0.829	0	4	8	13306	1	0	0
0.83	0	4	8	13306	1	0	0
0.831	0	4	8	13306	1	0	0
0.832	0	4	8	13306	1	0	0
0.833	0	4	8	13306	1	0	0
0.834	0	4	8	13306	1	0	0
0.835	0	4	8	13306	1	0	0
0.836	0	4	8	13306	1	0	0
0.837	0	4	8	13306	1	0	0
0.838	0	4	8	13306	1	0	0
0.839	0	4	8	13306	1	0	0
0.84	0	4	8	13306	1	0	0
0.841	0	4	8	13306	1	0	0
0.842	0	4	8	13306	1	0	0
0.843	0	4	8	13306	1	0	0
0.844	0	4	8	13306	1	0	0
0.845	0	4	8	13306	1	0	0
0.846	0	4	8	13306	1	0	0
0.847	0	4	8	13306	1	0	0
0.848	0	4	8	13306	1	0	0
0.849	0	4	8	13306	1	0	0
0.85	0	4	8	13306	1	0	0
0.851	0	4	8	13306	1	0	0
0.852	0	4	8	13306	1	0	0
0.853	0	4	8	13306	1	0	0
0.854	0	4	8	13306	1	0	0
0.855	0	4	8	13306	1	0	0
0.856	0	4	8	13306	1	0	0
0.857	0	4	8	13306	1	0	0
0.858	0	4	8	13306	1	0	0
0.859	0	4	8	13306	1	0	0
0.86	0	4	8	13306	1	0	0
0.861	0	4	8	13306	1	0	0
0.862	0	4	8	13306	1	0	0
0.863	0	4	8	13306	1	0	0
0.864	0	4	8	13306	1	0	0
0.865	0	4	8	13306	1	0	0
0.866	0	4	8	13306	1	0	0
0.867	0	4	8	13306	1	0	0
0.868	0	4	8	13306	1	0	0
0.869	0	4	8	13306	1	0	0
0.87	0	4	8	13306	1	0	0
0.871	0	4	8	13306	1	0	0
0.872	0	4	8	13306	1	0	0
0.873	0	4	8	13306	1	0	0
0.874	0	4	8	13306	1	0	0
0.875	0	4	8	13306	1	0	0
0.876	0	4	8	13306	1	0	0
0.877	0	4	8	13306	1	0	0
0.878	0	4	8	13306	1	0	0
0.879	0	4	8	13306	1	0	0
0.88	0	4	8	13306	1	0	0
0.881	0	4	8	13306	1	0	0
0.882	0	4	8	13306	1	0	0
0.883	0	4	8	13306	1	0	0
0.884	0	4	8	13306	1	0	0
0.885	0	4	8	13306	1	0	0
0.886	0	4	8	13306	1	0	0
0.887	0	4	8	13306	1	0	0
0.888	0	4	8	13306	1	0	0
0.889	0	4	8	13306	1	0	0
0.89	0	4	8	13306	1	0	0
0.891	0	4	8	13306	1	0	0
0.892	0	4	8	13306	1	0	0
0.893	0	4	8	13306	1	0	0
0.894	0	4	8	13306	1	0	0
0.895	0	4	8	13306	1	0	0
0.896	0	4	8	13306	1	0	0
0.897	0	4	8	13306	1	0	0
0.898	0	4	8	13306	1	0	0
0.899	0	3	8	13306	1	0	0
0.9	0	3	8	13306	1	0	0
0.901	0	3	8	13306	1	0	0
0.902	0	2	8	13306	1	0	0
0.903	0	2	8	13306	1	0	0
0.904	0	2	8	13306	1	0	0
0.905	0	2	8	13306	1	0	0
0.906	0	2	8	13306	1	0	0
0.907	0	2	8	13306	1	0	0
0.908	0	2	8	13306	1	0	0
0.909	0	2	8	13306	1	0	0
0.91	0	2	8	13306	1	0	0
0.911	0	2	8	13306	1	0	0
0.912	0	2	8	13306	1	0	0
0.913	0	2	8	13306	1	0	0
0.914	0	2	8	13306	1	0	0
0.915	0	2	8	13306	1	0	0
0.916	0	2	8	13306	1	0	0
0.917	0	2	8	13306	1	0	0
0.918	0	2	8	13306	1	0	0
0.919	0	2	8	13306	1	0	0
0.92	0	2	8	13306	1	0	0
0.921	0	2	8	13306	1	0	0
0.922	0	2	8	13306	1	0	0
0.923	0	2	8	13306	1	0	0
0.924	0	2	8	13306	1	0	0
0.925	0	2	8	13306	1	0	0
0.926	0	2	8	13306	1	0	0
0.927	0	2	8	13306	1	0	0
0.928	0	2	8	13306	1	0	0
0.929	0	2	8	13306	1	0	0
0.93	0	2	8	13306	1	0	0
0.931	0	2	8	13306	1	0	0
0.932	0	2	8	13306	1	0	0
0.933	0	2	8	13306	1	0	0
0.934	0	2	8	13306	1	0	0
0.935	0	2	8	13306	1	0	0
0.936	0	2	8	13306	1	0	0
0.937	0	2	8	13306	1	0	0
0.938	0	2	8	13306	1	0	0
0.939	0	2	8	13306	1	0	0
0.94	0	2	8	13306	1	0	0
0.941	0	2	8	13306	1	0	0
0.942	0	2	8	13306	1	0	0
0.943	0	2	8	13306	1	0	0
0.944	0	2	8	13306	1	0	0
0.945	0	2	8	13306	1	0	0
0.946	0	2	8	13306	1	0	0
0.947	0	2	8	13306	1	0	0
0.948	0	2	8	13306	1	0	0
0.949	0	2	8	13306	1	0	0
0.95	0	2	8	13306	1	0	0
0.951	0	2	8	13306	1	0	0
0.952	0	2	8	13306	1	0	0
0.953	0	2	8	13306	1	0	0
0.954	0	2	8	13306	1	0	0
0.955	0	2	8	13306	1	0	0
0.956	0	2	8	13306	1	0	0
0.957	0	2	8	13306	1	0	0
0.958	0	2	8	13306	1	0	0
0.959	0	2	8	13306	1	0	0
0.96	0	2	8	13306	1	0	0
0.961	0	2	8	13306	1	0	0
0.962	0	2	8	13306	1	0	0
0.963	0	2	8	13306	1	0	0
0.964	0	2	8	13306	1	0	0
0.965	0	2	8	13306	1	0	0
0.966	0	2	8	13306	1	0	0
0.967	0	2	8	13306	1	0	0
0.968	0	2	8	13306	1	0	0
0.969	0	2	8	13306	1	0	0
0.97	0	2	8	13306	1	0	0
0.971	0	2	8	13306	1	0	0
0.972	0	2	8	13306	1	0	0
0.973	0	2	8	13306	1	0	0
0.974	0	2	8	13306	1	0	0
0.975	0	2	8	13306	1	0	0
0.976	0	2	8	13306	1	0	0
0.977	0	2	8	13306	1	0	0
0.978	0	2	8	13306	1	0	0
0.979	0	2	8	13306	1	0	0
0.98	0	2	8	13306	1	0	0
0.981	0	2	8	13306	1	0	0
0.982	0	1	8	13306	1	0	0
0.983	0	1	8	13306	1	0	0
0.984	0	1	8	13306	1	0	0
0.985	0	1	8	13306	1	0	0
0.986	0	1	8	13306	1	0	0
0.987	0	1	8	13306	1	0	0
0.988	0	1	8	13306	1	0	0
0.989	0	1	8	13306	1	0	0
0.99	0	1	8	13306	1	0	0
0.991	0	1	8	13306	1	0	0
0.992	0	1	8	13306	1	0	0
0.993	0	1	8	13306	1	0	0
0.994	0	1	8	13306	1	0	0
0.995	0	1	8	13306	1	0	0
0.996	0	1	8	13306	1	0	0
0.997	0	1	8	13306	1	0	0
0.998	0	1	8	13306	1	0	0
0.999	0	1	8	13306	1	0	0
