# Supplementary material for: Bioinformatics Analysis of Transcriptomic Data Reveals Refined Functional Networks for the Self-Renewal of Mouse Spermatogonial Stem Cells
Source: Stem Cells Int. 2018 Jul 8;2018:5842714. doi: 10.1155/2018/5842714 (PMC6079398; doi:10.1155/2018/5842714)
Supplement: Supplementary Materials — Supplementary data 1: detailed list for gene expression and annotation. Supplementary data 2: detailed results of dynamic screening of candidate genes. Supplementary data 3: detailed information for the refined network. Supplementary data 4: detailed results of functional enrichment analyses. [file 5842714.f1.zip › Supplementary data 3.xlsx]

## Sheet: Sheet1
>interaction	#node1	#node2	node1_external_id	node2_external_id	neighborhood_on_chromosome	gene_fusion	phylogenetic_cooccurrence	homology	coexpression	experimentally_determined_interaction	database_annotated	automated_textmining	combined_score	>node 1 information	Gene symbol	Ensembl gene ID	priSG-A	SG-A	Average	Average change percentage	Average percentile rank	Expression index	Fold change	Change trend	MGI ID	Cell proliferation or differentiation	Male fertility association	Canonical markers	>node 2 information	Gene symbol	Ensembl gene ID	priSG-A	SG-A	Average	Average change percentage	Average percentile rank	Expression index	Fold change	Change trend	MGI ID	Cell proliferation or differentiation	Male fertility association	Canonical markers
>interaction	Arpc5	Actr3	10090.ENSMUSP00000076933	10090.ENSMUSP00000027579	0	0	0	0	0.433	0.982	0.941	0.639	0.999	>node 1 information	Arpc5	ENSMUSG00000008475	22.2541	35.4329	28.8435	0.456908	0.809	0.369639	-1.5922	Down	MGI:1915021				>node 2 information	Actr3	ENSMUSG00000026341	31.0107	50.3094	40.66	0.474635	0.899	0.426697	-1.62232	Down	MGI:1921367	cell differentiation
>interaction	Cops2	Cops5	10090.ENSMUSP00000028635	10090.ENSMUSP00000027050	0	0	0	0	0.387	0.965	0.918	0.64	0.999	>node 1 information	Cops2	ENSMUSG00000027206	25.3319	35.7837	30.5578	0.342034	0.826	0.28252	-1.41259	Down	MGI:1330276	cell proliferation;cell differentiation			>node 2 information	Cops5	ENSMUSG00000025917	26.1005	36.3417	31.2211	0.328022	0.832	0.272914	-1.39238	Down	MGI:1349415
>interaction	Arcn1	Copb1	10090.ENSMUSP00000034607	10090.ENSMUSP00000033012	0	0	0	0	0.663	0.956	0.9	0.623	0.999	>node 1 information	Arcn1	ENSMUSG00000032096	36.1421	50.5648	43.3535	0.332677	0.912	0.303402	-1.39906	Down	MGI:2387591				>node 2 information	Copb1	ENSMUSG00000030754	31.331	43.654	37.4925	0.328679	0.88	0.289238	-1.39332	Down	MGI:1917599
>interaction	Usp14	Psmd6	10090.ENSMUSP00000089728	10090.ENSMUSP00000022256	0	0	0	0	0.778	0.964	0.9	0.157	0.999	>node 1 information	Usp14	ENSMUSG00000047879	17.3202	26.1367	21.7284	0.405758	0.728	0.295392	-1.50903	Down	MGI:1928898		abnormal male fertility		>node 2 information	Psmd6	ENSMUSG00000021737	40.3639	54.0615	47.2127	0.290125	0.93	0.269817	-1.33935	Down	MGI:1913663
>interaction	Psmd14	Psmd6	10090.ENSMUSP00000028278	10090.ENSMUSP00000022256	0	0	0	0	0.88	0.965	0.9	0.553	0.999	>node 1 information	Psmd14	ENSMUSG00000026914	35.7514	55.7193	45.7353	0.436597	0.924	0.403415	-1.55852	Down	MGI:1913284				>node 2 information	Psmd6	ENSMUSG00000021737	40.3639	54.0615	47.2127	0.290125	0.93	0.269817	-1.33935	Down	MGI:1913663
>interaction	Impdh1	Gmps	10090.ENSMUSP00000077289	10090.ENSMUSP00000029405	0.493	0	0.327	0	0.956	0.918	0.964	0.586	0.999	>node 1 information	Impdh1	ENSMUSG00000003500	31.429	22.2511	26.8401	0.341948	0.789	0.269797	1.41247	Up	MGI:96567	cell proliferation			>node 2 information	Gmps	ENSMUSG00000027823	30.2407	41.7003	35.9705	0.318583	0.871	0.277486	-1.37895	Down	MGI:2448526
>interaction	Arpc3	Arpc5	10090.ENSMUSP00000099584	10090.ENSMUSP00000076933	0	0	0	0	0.314	0.979	0.95	0.814	0.999	>node 1 information	Arpc3	ENSMUSG00000029465	57.8603	41.9539	49.9071	0.31872	0.939	0.299278	1.37914	Up	MGI:1928375				>node 2 information	Arpc5	ENSMUSG00000008475	22.2541	35.4329	28.8435	0.456908	0.809	0.369639	-1.5922	Down	MGI:1915021
>interaction	Psmd6	Psma6	10090.ENSMUSP00000022256	10090.ENSMUSP00000021412	0	0	0	0	0.815	0.965	0.9	0.125	0.999	>node 1 information	Psmd6	ENSMUSG00000021737	40.3639	54.0615	47.2127	0.290125	0.93	0.269817	-1.33935	Down	MGI:1913663				>node 2 information	Psma6	ENSMUSG00000021024	49.725	69.4944	59.6097	0.331647	0.963	0.319376	-1.39757	Down	MGI:1347006
>interaction	Usp14	Psmd14	10090.ENSMUSP00000089728	10090.ENSMUSP00000028278	0	0	0	0	0.676	0.964	0.9	0.68	0.999	>node 1 information	Usp14	ENSMUSG00000047879	17.3202	26.1367	21.7284	0.405758	0.728	0.295392	-1.50903	Down	MGI:1928898		abnormal male fertility		>node 2 information	Psmd14	ENSMUSG00000026914	35.7514	55.7193	45.7353	0.436597	0.924	0.403415	-1.55852	Down	MGI:1913284
>interaction	Rad21l	Smc1b	10090.ENSMUSP00000094174	10090.ENSMUSP00000023068	0	0	0	0	0.47	0.89	0.9	0.875	0.999	>node 1 information	Rad21l	ENSMUSG00000074704	3.57825	10.297	6.93762	0.968451	0.454	0.439677	-2.87766	Down	MGI:3652039		abnormal male fertility		>node 2 information	Smc1b	ENSMUSG00000022432	31.3255	53.9162	42.6208	0.530039	0.909	0.481805	-1.72116	Down	MGI:2154049		abnormal male fertility
>interaction	Psmd14	Psma6	10090.ENSMUSP00000028278	10090.ENSMUSP00000021412	0	0	0	0	0.629	0.965	0.95	0.145	0.999	>node 1 information	Psmd14	ENSMUSG00000026914	35.7514	55.7193	45.7353	0.436597	0.924	0.403415	-1.55852	Down	MGI:1913284				>node 2 information	Psma6	ENSMUSG00000021024	49.725	69.4944	59.6097	0.331647	0.963	0.319376	-1.39757	Down	MGI:1347006
>interaction	Gmps	Gmpr	10090.ENSMUSP00000029405	10090.ENSMUSP00000000260	0.493	0	0	0	0.956	0.92	0.964	0.546	0.999	>node 1 information	Gmps	ENSMUSG00000027823	30.2407	41.7003	35.9705	0.318583	0.871	0.277486	-1.37895	Down	MGI:2448526				>node 2 information	Gmpr	ENSMUSG00000000253	18.397	11.1919	14.7944	0.487014	0.622	0.302923	1.64378	Up	MGI:1913605
>interaction	Cnot7	Cnot6	10090.ENSMUSP00000034012	10090.ENSMUSP00000020624	0	0	0	0	0.165	0.956	0.9	0.814	0.999	>node 1 information	Cnot7	ENSMUSG00000031601	33.9047	53.7605	43.8326	0.452992	0.915	0.414487	-1.58564	Down	MGI:1298230	cell proliferation	abnormal male fertility		>node 2 information	Cnot6	ENSMUSG00000020362	22.6818	33.5257	28.1038	0.385852	0.803	0.309839	-1.47809	Down	MGI:2144529	cell proliferation
>interaction	Exosc3	Exosc9	10090.ENSMUSP00000030003	10090.ENSMUSP00000029269	0.318	0	0	0	0.301	0.963	0.9	0.685	0.999	>node 1 information	Exosc3	ENSMUSG00000028322	23.8198	38.9875	31.4036	0.482992	0.834	0.402815	-1.63677	Down	MGI:1913612				>node 2 information	Exosc9	ENSMUSG00000027714	15.2009	22.659	18.93	0.393984	0.687	0.270667	-1.49064	Down	MGI:1355319
>interaction	C1qb	C1qc	10090.ENSMUSP00000040246	10090.ENSMUSP00000036747	0	0	0.209	0.903	0.893	0.776	0.95	0.758	0.998	>node 1 information	C1qb	ENSMUSG00000036905	5.65767	1.95619	3.80693	0.972301	0.369	0.358779	2.89219	Up	MGI:88224				>node 2 information	C1qc	ENSMUSG00000036896	4.75087	1.95749	3.35418	0.832806	0.355	0.295646	2.42702	Up	MGI:88225	cell differentiation
>interaction	C1qa	C1qc	10090.ENSMUSP00000048836	10090.ENSMUSP00000036747	0	0	0	0.823	0.902	0.776	0.95	0.63	0.998	>node 1 information	C1qa	ENSMUSG00000036887	5.04134	1.85564	3.44849	0.923796	0.357	0.329795	2.71677	Up	MGI:88223				>node 2 information	C1qc	ENSMUSG00000036896	4.75087	1.95749	3.35418	0.832806	0.355	0.295646	2.42702	Up	MGI:88225	cell differentiation
>interaction	Mcm9	Mcm8	10090.ENSMUSP00000074978	10090.ENSMUSP00000066842	0	0	0.412	0.73	0.871	0.785	0.933	0.86	0.998	>node 1 information	Mcm9	ENSMUSG00000058298	11.5128	4.25857	7.88568	0.919924	0.476	0.437884	2.70344	Up	MGI:1918817				>node 2 information	Mcm8	ENSMUSG00000027353	15.6926	25.9249	20.8087	0.491731	0.716	0.352079	-1.65205	Down	MGI:1913884		abnormal male fertility
>interaction	Smc5	Smc6	10090.ENSMUSP00000084837	10090.ENSMUSP00000020931	0	0	0	0.61	0.727	0.918	0.9	0.964	0.998	>node 1 information	Smc5	ENSMUSG00000024943	16.0463	24.2651	20.1557	0.407766	0.707	0.28829	-1.51219	Down	MGI:2385088				>node 2 information	Smc6	ENSMUSG00000020608	35.9419	50.198	43.0699	0.330999	0.912	0.301871	-1.39664	Down	MGI:1914491
>interaction	C1qa	C1qb	10090.ENSMUSP00000048836	10090.ENSMUSP00000040246	0	0	0	0.838	0.898	0.776	0.95	0.802	0.998	>node 1 information	C1qa	ENSMUSG00000036887	5.04134	1.85564	3.44849	0.923796	0.357	0.329795	2.71677	Up	MGI:88223				>node 2 information	C1qb	ENSMUSG00000036905	5.65767	1.95619	3.80693	0.972301	0.369	0.358779	2.89219	Up	MGI:88224
>interaction	S100a9	S100a8	10090.ENSMUSP00000070842	10090.ENSMUSP00000064385	0	0	0	0.866	0.857	0.783	0.95	0.935	0.998	>node 1 information	S100a9	ENSMUSG00000056071	0.783888	0	0.391944	2	0.162	0.324	0	Up	MGI:1338947	cell differentiation			>node 2 information	S100a8	ENSMUSG00000056054	0.876137	0	0.438069	2	0.172	0.344	0	Up	MGI:88244	cell differentiation
>interaction	Arpc3	Actr3	10090.ENSMUSP00000099584	10090.ENSMUSP00000027579	0	0	0	0	0.163	0.922	0.941	0.61	0.998	>node 1 information	Arpc3	ENSMUSG00000029465	57.8603	41.9539	49.9071	0.31872	0.939	0.299278	1.37914	Up	MGI:1928375				>node 2 information	Actr3	ENSMUSG00000026341	31.0107	50.3094	40.66	0.474635	0.899	0.426697	-1.62232	Down	MGI:1921367	cell differentiation
>interaction	Exosc9	C1d	10090.ENSMUSP00000029269	10090.ENSMUSP00000000594	0	0	0	0	0.094	0.949	0.9	0.452	0.997	>node 1 information	Exosc9	ENSMUSG00000027714	15.2009	22.659	18.93	0.393984	0.687	0.270667	-1.49064	Down	MGI:1355319				>node 2 information	C1d	ENSMUSG00000000581	6.17138	11.2441	8.70774	0.582553	0.494	0.287781	-1.82197	Down	MGI:1927354
>interaction	Vhl	Epas1	10090.ENSMUSP00000039418	10090.ENSMUSP00000024954	0	0	0	0	0	0.578	0.941	0.887	0.997	>node 1 information	Vhl	ENSMUSG00000033933	24.7419	36.1859	30.4639	0.375658	0.824	0.309542	-1.46254	Down	MGI:103223	cell proliferation;cell differentiation	abnormal male fertility		>node 2 information	Epas1	ENSMUSG00000024140	23.1393	33.9955	28.5674	0.380021	0.807	0.306677	-1.46917	Down	MGI:109169	cell differentiation
>interaction	Usp14	Psma6	10090.ENSMUSP00000089728	10090.ENSMUSP00000021412	0	0	0	0	0.462	0.965	0.9	0	0.997	>node 1 information	Usp14	ENSMUSG00000047879	17.3202	26.1367	21.7284	0.405758	0.728	0.295392	-1.50903	Down	MGI:1928898		abnormal male fertility		>node 2 information	Psma6	ENSMUSG00000021024	49.725	69.4944	59.6097	0.331647	0.963	0.319376	-1.39757	Down	MGI:1347006
>interaction	Exosc3	C1d	10090.ENSMUSP00000030003	10090.ENSMUSP00000000594	0	0	0	0	0.212	0.949	0.9	0.442	0.997	>node 1 information	Exosc3	ENSMUSG00000028322	23.8198	38.9875	31.4036	0.482992	0.834	0.402815	-1.63677	Down	MGI:1913612				>node 2 information	C1d	ENSMUSG00000000581	6.17138	11.2441	8.70774	0.582553	0.494	0.287781	-1.82197	Down	MGI:1927354
>interaction	Top2a	Top2b	10090.ENSMUSP00000068896	10090.ENSMUSP00000017629	0.493	0	0	0.977	0.67	0.975	0.54	0.791	0.997	>node 1 information	Top2a	ENSMUSG00000020914	47.0462	64.8343	55.9402	0.317984	0.955	0.303675	-1.3781	Down	MGI:98790	cell differentiation			>node 2 information	Top2b	ENSMUSG00000017485	11.6204	23.5306	17.5755	0.677659	0.667	0.451999	-2.02494	Down	MGI:98791	cell differentiation
>interaction	Rbbp4	Hdac2	10090.ENSMUSP00000099658	10090.ENSMUSP00000019911	0	0	0	0	0.255	0.82	0.935	0.76	0.997	>node 1 information	Rbbp4	ENSMUSG00000057236	103.011	139.545	121.278	0.301242	0.997	0.300338	-1.35466	Down	MGI:1194912				>node 2 information	Hdac2	ENSMUSG00000019777	62.0497	84.1093	73.0795	0.301858	0.981	0.296122	-1.35552	Down	MGI:1097691	cell proliferation;cell differentiation
>interaction	Jun	Mapk9	10090.ENSMUSP00000054270	10090.ENSMUSP00000020634	0	0	0	0	0	0.358	0.95	0.935	0.997	>node 1 information	Jun	ENSMUSG00000052684	51.1912	37.6828	44.437	0.30399	0.917	0.278759	1.35848	Up	MGI:96646	cell proliferation;cell differentiation			>node 2 information	Mapk9	ENSMUSG00000020366	27.7559	40.878	34.3169	0.38238	0.857	0.327699	-1.47277	Down	MGI:1346862	cell differentiation
>interaction	Nde1	Pafah1b1	10090.ENSMUSP00000023359	10090.ENSMUSP00000021091	0	0	0	0	0.049	0.519	0.94	0.873	0.996	>node 1 information	Nde1	ENSMUSG00000022678	31.929	21.2906	26.6098	0.399793	0.786	0.314237	1.49968	Up	MGI:1914453	cell proliferation;cell differentiation			>node 2 information	Pafah1b1	ENSMUSG00000020745	37.7155	55.4333	46.5744	0.380419	0.928	0.353029	-1.46978	Down	MGI:109520	cell proliferation;cell differentiation	abnormal male fertility
>interaction	Srsf6	Srsf2	10090.ENSMUSP00000119065	10090.ENSMUSP00000090059	0	0	0	0	0.371	0.472	0.918	0.886	0.996	>node 1 information	Srsf6	ENSMUSG00000016921	38.555	52.7262	45.6406	0.310495	0.923	0.286587	-1.36756	Down	MGI:1915246	cell proliferation;cell differentiation			>node 2 information	Srsf2	ENSMUSG00000034120	58.934	85.9297	72.4318	0.372705	0.981	0.365623	-1.45807	Down	MGI:98284
>interaction	Skp1a	Fbxo2	10090.ENSMUSP00000038744	10090.ENSMUSP00000037377	0	0	0	0	0	0.829	0.95	0.652	0.996	>node 1 information	Skp1a	ENSMUSG00000036309	50.0088	80.2426	65.1257	0.464238	0.972	0.451239	-1.60457	Down	MGI:103575				>node 2 information	Fbxo2	ENSMUSG00000041556	5.71803	2.21126	3.96464	0.88451	0.374	0.330807	2.58587	Up	MGI:2446216	cell proliferation
>interaction	Atp6v1g1	Atp6v1h	10090.ENSMUSP00000048770	10090.ENSMUSP00000040756	0	0	0	0	0.153	0.796	0.9	0.819	0.996	>node 1 information	Atp6v1g1	ENSMUSG00000039105	26.6606	38.6864	32.6735	0.36806	0.844	0.310642	-1.45107	Down	MGI:1913540				>node 2 information	Atp6v1h	ENSMUSG00000033793	24.4935	40.1146	32.304	0.483565	0.841	0.406678	-1.63777	Down	MGI:1914864
>interaction	Nsmce4a	Smc5	10090.ENSMUSP00000125300	10090.ENSMUSP00000084837	0	0	0	0	0.128	0.909	0.9	0.544	0.995	>node 1 information	Nsmce4a	ENSMUSG00000040331	31.8639	43.3607	37.6123	0.305666	0.881	0.269292	-1.36081	Down	MGI:1915122				>node 2 information	Smc5	ENSMUSG00000024943	16.0463	24.2651	20.1557	0.407766	0.707	0.28829	-1.51219	Down	MGI:2385088
>interaction	Flna	Fblim1	10090.ENSMUSP00000098997	10090.ENSMUSP00000006381	0	0	0	0	0	0.902	0.91	0.535	0.995	>node 1 information	Flna	ENSMUSG00000031328	38.0143	27.343	32.6786	0.326553	0.844	0.27561	1.39028	Up	MGI:95556	cell proliferation;cell differentiation			>node 2 information	Fblim1	ENSMUSG00000006219	5.15086	2.09735	3.62411	0.842556	0.362	0.305005	2.45589	Up	MGI:1921452
>interaction	Nsmce4a	Smc6	10090.ENSMUSP00000125300	10090.ENSMUSP00000020931	0	0	0	0	0.113	0.875	0.9	0.545	0.994	>node 1 information	Nsmce4a	ENSMUSG00000040331	31.8639	43.3607	37.6123	0.305666	0.881	0.269292	-1.36081	Down	MGI:1915122				>node 2 information	Smc6	ENSMUSG00000020608	35.9419	50.198	43.0699	0.330999	0.912	0.301871	-1.39664	Down	MGI:1914491
>interaction	Rbbp4	Suz12	10090.ENSMUSP00000099658	10090.ENSMUSP00000017692	0	0	0	0	0.096	0.636	0.941	0.756	0.994	>node 1 information	Rbbp4	ENSMUSG00000057236	103.011	139.545	121.278	0.301242	0.997	0.300338	-1.35466	Down	MGI:1194912				>node 2 information	Suz12	ENSMUSG00000017548	25.5889	40.6406	33.1148	0.454532	0.848	0.385443	-1.58821	Down	MGI:1261758	cell proliferation;cell differentiation
>interaction	Mcm8	Cdt1	10090.ENSMUSP00000066842	10090.ENSMUSP00000006760	0	0	0	0	0.305	0.729	0.936	0.616	0.994	>node 1 information	Mcm8	ENSMUSG00000027353	15.6926	25.9249	20.8087	0.491731	0.716	0.352079	-1.65205	Down	MGI:1913884		abnormal male fertility		>node 2 information	Cdt1	ENSMUSG00000006585	30.4764	21.5604	26.0184	0.342681	0.781	0.267634	1.41354	Up	MGI:1914427
>interaction	Pdia6	Hsp90b1	10090.ENSMUSP00000052912	10090.ENSMUSP00000020238	0	0	0	0	0.947	0.333	0.72	0.436	0.993	>node 1 information	Pdia6	ENSMUSG00000020571	57.0409	77.7226	67.3817	0.306933	0.975	0.29926	-1.36258	Down	MGI:1919103				>node 2 information	Hsp90b1	ENSMUSG00000020048	91.776	128.922	110.349	0.336623	0.996	0.335276	-1.40475	Down	MGI:98817
>interaction	Mapk10	Jun	10090.ENSMUSP00000108468	10090.ENSMUSP00000054270	0	0	0	0	0	0.358	0.901	0.898	0.993	>node 1 information	Mapk10	ENSMUSG00000046709	14.6367	8.59425	11.6155	0.520207	0.561	0.291836	1.70308	Up	MGI:1346863	cell differentiation			>node 2 information	Jun	ENSMUSG00000052684	51.1912	37.6828	44.437	0.30399	0.917	0.278759	1.35848	Up	MGI:96646	cell proliferation;cell differentiation
>interaction	Ret	Gfra1	10090.ENSMUSP00000032201	10090.ENSMUSP00000026076	0	0	0	0	0	0.545	0.95	0.72	0.993	>node 1 information	Ret	ENSMUSG00000030110	36.526	25.857	31.1915	0.342048	0.832	0.284584	1.41262	Up	MGI:97902	cell differentiation	abnormal male fertility;abnormal spermatogenesis	Ret	>node 2 information	Gfra1	ENSMUSG00000025089	12.6191	6.45463	9.53689	0.646387	0.515	0.332889	1.95505	Up	MGI:1100842	cell differentiation		Gfra1
>interaction	Utp18	Nop58	10090.ENSMUSP00000068103	10090.ENSMUSP00000027174	0	0	0	0	0.764	0.685	0.9	0.191	0.993	>node 1 information	Utp18	ENSMUSG00000054079	19.3802	41.494	30.4371	0.726541	0.824	0.59867	-2.14105	Down	MGI:1923402				>node 2 information	Nop58	ENSMUSG00000026020	38.1776	55.3223	46.7499	0.366732	0.929	0.340694	-1.44908	Down	MGI:1933184
>interaction	Sycp2	Sycp3	10090.ENSMUSP00000079909	10090.ENSMUSP00000020252	0	0	0	0	0.124	0.535	0.9	0.847	0.993	>node 1 information	Sycp2	ENSMUSG00000060445	10.1192	23.1841	16.6517	0.784601	0.653	0.512344	-2.2911	Down	MGI:1933281		abnormal male fertility		>node 2 information	Sycp3	ENSMUSG00000020059	24.6262	56.2319	40.429	0.781757	0.898	0.702018	-2.28342	Down	MGI:109542	cell differentiation	abnormal male fertility
>interaction	Col6a2	Col6a1	10090.ENSMUSP00000001181	10090.ENSMUSP00000001147	0	0	0	0.807	0.851	0.047	0.95	0.841	0.993	>node 1 information	Col6a2	ENSMUSG00000020241	9.87511	3.93759	6.90635	0.859719	0.453	0.389453	2.50791	Up	MGI:88460				>node 2 information	Col6a1	ENSMUSG00000001119	9.71911	2.2577	5.98841	1.24598	0.428	0.533278	4.30487	Up	MGI:88459
>interaction	Top1	Top2b	10090.ENSMUSP00000105094	10090.ENSMUSP00000017629	0	0	0	0	0.221	0.965	0	0.748	0.992	>node 1 information	Top1	ENSMUSG00000070544	36.4619	49.2722	42.867	0.298838	0.911	0.272241	-1.35133	Down	MGI:98788				>node 2 information	Top2b	ENSMUSG00000017485	11.6204	23.5306	17.5755	0.677659	0.667	0.451999	-2.02494	Down	MGI:98791	cell differentiation
>interaction	Dld	Gldc	10090.ENSMUSP00000106481	10090.ENSMUSP00000025778	0.493	0	0	0	0.095	0	0.964	0.614	0.992	>node 1 information	Dld	ENSMUSG00000020664	25.2514	39.3389	32.2951	0.436211	0.841	0.366853	-1.55789	Down	MGI:107450	cell differentiation			>node 2 information	Gldc	ENSMUSG00000024827	25.6281	15.4695	20.5488	0.494365	0.712	0.351988	1.65669	Up	MGI:1341155
>interaction	Nhp2l1	Nop58	10090.ENSMUSP00000091840	10090.ENSMUSP00000027174	0	0	0	0	0.794	0.785	0	0.839	0.992	>node 1 information	Nhp2l1	ENSMUSG00000063480	33.7821	45.8238	39.803	0.302533	0.895	0.270767	-1.35645	Down	MGI:893586				>node 2 information	Nop58	ENSMUSG00000026020	38.1776	55.3223	46.7499	0.366732	0.929	0.340694	-1.44908	Down	MGI:1933184
>interaction	Bub1	Cdk1	10090.ENSMUSP00000028858	10090.ENSMUSP00000020099	0	0	0	0	0.818	0.634	0.528	0.75	0.991	>node 1 information	Bub1	ENSMUSG00000027379	25.1238	36.3607	30.7422	0.36552	0.828	0.30265	-1.44726	Down	MGI:1100510		abnormal male fertility;abnormal spermatogenesis		>node 2 information	Cdk1	ENSMUSG00000019942	57.6102	40.4389	49.0245	0.350259	0.936	0.327843	1.42462	Up	MGI:88351	cell proliferation;cell differentiation
>interaction	Top1	Top2a	10090.ENSMUSP00000105094	10090.ENSMUSP00000068896	0	0	0	0	0.123	0.965	0	0.745	0.991	>node 1 information	Top1	ENSMUSG00000070544	36.4619	49.2722	42.867	0.298838	0.911	0.272241	-1.35133	Down	MGI:98788				>node 2 information	Top2a	ENSMUSG00000020914	47.0462	64.8343	55.9402	0.317984	0.955	0.303675	-1.3781	Down	MGI:98790	cell differentiation
>interaction	Skp1a	Fbxl3	10090.ENSMUSP00000038744	10090.ENSMUSP00000022720	0	0	0	0	0	0.909	0.9	0.175	0.991	>node 1 information	Skp1a	ENSMUSG00000036309	50.0088	80.2426	65.1257	0.464238	0.972	0.451239	-1.60457	Down	MGI:103575				>node 2 information	Fbxl3	ENSMUSG00000022124	19.264	29.4556	24.3598	0.418378	0.763	0.319222	-1.52905	Down	MGI:1354702
>interaction	Pkmyt1	Cdk1	10090.ENSMUSP00000024701	10090.ENSMUSP00000020099	0	0	0	0.702	0.326	0.782	0.925	0.709	0.99	>node 1 information	Pkmyt1	ENSMUSG00000023908	12.409	7.34801	9.87851	0.512323	0.523	0.267945	1.68876	Up	MGI:2137630				>node 2 information	Cdk1	ENSMUSG00000019942	57.6102	40.4389	49.0245	0.350259	0.936	0.327843	1.42462	Up	MGI:88351	cell proliferation;cell differentiation
>interaction	Hsd3b1	Cyp11a1	10090.ENSMUSP00000102630	10090.ENSMUSP00000034874	0.07	0	0	0	0.38	0.115	0.935	0.76	0.99	>node 1 information	Hsd3b1	ENSMUSG00000027871	37.3743	13.6483	25.5113	0.930019	0.775	0.720765	2.73839	Up	MGI:96233				>node 2 information	Cyp11a1	ENSMUSG00000032323	32.2124	13.8869	23.0496	0.795045	0.745	0.592308	2.31962	Up	MGI:88582		abnormal spermatogenesis
>interaction	Nop58	Ddx56	10090.ENSMUSP00000027174	10090.ENSMUSP00000004507	0	0	0	0	0.939	0.806	0	0.139	0.989	>node 1 information	Nop58	ENSMUSG00000026020	38.1776	55.3223	46.7499	0.366732	0.929	0.340694	-1.44908	Down	MGI:1933184				>node 2 information	Ddx56	ENSMUSG00000004393	48.5664	33.3119	40.9391	0.372614	0.901	0.335725	1.45793	Up	MGI:1277172	cell differentiation
>interaction	Pfn2	Vasp	10090.ENSMUSP00000068890	10090.ENSMUSP00000032561	0	0	0	0	0.052	0.766	0.9	0.533	0.988	>node 1 information	Pfn2	ENSMUSG00000027805	25.5363	35.7026	30.6195	0.332021	0.827	0.274581	-1.39811	Down	MGI:97550				>node 2 information	Vasp	ENSMUSG00000030403	28.6723	19.4157	24.044	0.384986	0.758	0.291819	1.47676	Up	MGI:109268	cell differentiation
>interaction	Ube2c	Cdk1	10090.ENSMUSP00000085581	10090.ENSMUSP00000020099	0	0	0	0	0.821	0	0.9	0.389	0.988	>node 1 information	Ube2c	ENSMUSG00000001403	47.8028	33.7011	40.752	0.346037	0.9	0.311434	1.41843	Up	MGI:1915862				>node 2 information	Cdk1	ENSMUSG00000019942	57.6102	40.4389	49.0245	0.350259	0.936	0.327843	1.42462	Up	MGI:88351	cell proliferation;cell differentiation
>interaction	Rbbp4	Smarca5	10090.ENSMUSP00000099658	10090.ENSMUSP00000044361	0	0	0	0	0.313	0.682	0.917	0.427	0.988	>node 1 information	Rbbp4	ENSMUSG00000057236	103.011	139.545	121.278	0.301242	0.997	0.300338	-1.35466	Down	MGI:1194912				>node 2 information	Smarca5	ENSMUSG00000031715	17.5076	26.9327	22.2202	0.424169	0.735	0.311764	-1.53834	Down	MGI:1935129
>interaction	Eps15	Picalm	10090.ENSMUSP00000099790	10090.ENSMUSP00000051092	0	0	0	0	0.115	0.449	0.95	0.561	0.988	>node 1 information	Eps15	ENSMUSG00000028552	34.5706	56.7453	45.6579	0.48567	0.923	0.448273	-1.64143	Down	MGI:104583	cell proliferation			>node 2 information	Picalm	ENSMUSG00000039361	33.0181	46.863	39.9406	0.346638	0.895	0.310241	-1.41931	Down	MGI:2385902	cell proliferation;cell differentiation
>interaction	Orc5	Cdt1	10090.ENSMUSP00000030872	10090.ENSMUSP00000006760	0	0	0	0	0.117	0	0.95	0.748	0.988	>node 1 information	Orc5	ENSMUSG00000029012	32.0778	44.1858	38.1318	0.31753	0.885	0.281014	-1.37746	Down	MGI:1347044				>node 2 information	Cdt1	ENSMUSG00000006585	30.4764	21.5604	26.0184	0.342681	0.781	0.267634	1.41354	Up	MGI:1914427
>interaction	Srsf2	Srsf7	10090.ENSMUSP00000090059	10090.ENSMUSP00000070983	0	0	0	0.69	0.378	0.787	0.9	0.74	0.988	>node 1 information	Srsf2	ENSMUSG00000034120	58.934	85.9297	72.4318	0.372705	0.981	0.365623	-1.45807	Down	MGI:98284				>node 2 information	Srsf7	ENSMUSG00000024097	37.097	50.8106	43.9538	0.312	0.916	0.285792	-1.36967	Down	MGI:1926232
>interaction	Idh2	Aco2	10090.ENSMUSP00000103007	10090.ENSMUSP00000023116	0.318	0	0	0	0.257	0.071	0.946	0.582	0.987	>node 1 information	Idh2	ENSMUSG00000030541	23.7115	6.32501	15.0183	1.15769	0.628	0.72703	3.74885	Up	MGI:96414	cell proliferation;cell differentiation			>node 2 information	Aco2	ENSMUSG00000022477	40.1914	59.2796	49.7355	0.383794	0.939	0.360383	-1.47493	Down	MGI:87880
>interaction	Srsf3	Srsf2	10090.ENSMUSP00000117045	10090.ENSMUSP00000090059	0	0	0	0.712	0.453	0.724	0.9	0.807	0.987	>node 1 information	Srsf3	ENSMUSG00000071172	29.2949	42.2882	35.7916	0.363027	0.871	0.316197	-1.44353	Down	MGI:98285				>node 2 information	Srsf2	ENSMUSG00000034120	58.934	85.9297	72.4318	0.372705	0.981	0.365623	-1.45807	Down	MGI:98284
>interaction	Smc4	Cdk1	10090.ENSMUSP00000047872	10090.ENSMUSP00000020099	0	0	0	0	0.578	0.677	0.9	0.193	0.987	>node 1 information	Smc4	ENSMUSG00000034349	22.8962	42.0519	32.474	0.589877	0.842	0.496677	-1.83663	Down	MGI:1917349				>node 2 information	Cdk1	ENSMUSG00000019942	57.6102	40.4389	49.0245	0.350259	0.936	0.327843	1.42462	Up	MGI:88351	cell proliferation;cell differentiation
>interaction	Rps6kb1	Rheb	10090.ENSMUSP00000119715	10090.ENSMUSP00000030787	0	0	0	0	0	0.21	0.904	0.84	0.986	>node 1 information	Rps6kb1	ENSMUSG00000020516	21.1689	32.9629	27.0659	0.435751	0.792	0.345115	-1.55714	Down	MGI:1270849	cell proliferation;cell differentiation			>node 2 information	Rheb	ENSMUSG00000028945	24.9841	40.1522	32.5682	0.465734	0.843	0.392614	-1.60711	Down	MGI:97912	cell differentiation
>interaction	Gmps	Aprt	10090.ENSMUSP00000029405	10090.ENSMUSP00000006764	0.158	0	0	0	0.48	0.401	0.9	0.574	0.986	>node 1 information	Gmps	ENSMUSG00000027823	30.2407	41.7003	35.9705	0.318583	0.871	0.277486	-1.37895	Down	MGI:2448526				>node 2 information	Aprt	ENSMUSG00000006589	65.9957	46.4001	56.1979	0.348689	0.956	0.333347	1.42232	Up	MGI:88061
>interaction	Hsd3b1	Cyp17a1	10090.ENSMUSP00000102630	10090.ENSMUSP00000026012	0.07	0	0	0	0.125	0.115	0.935	0.719	0.984	>node 1 information	Hsd3b1	ENSMUSG00000027871	37.3743	13.6483	25.5113	0.930019	0.775	0.720765	2.73839	Up	MGI:96233				>node 2 information	Cyp17a1	ENSMUSG00000003555	21.2939	6.61454	13.9542	1.05197	0.607	0.638543	3.21926	Up	MGI:88586		abnormal male fertility
>interaction	Pnmal2	Pgk1	10090.ENSMUSP00000092401	10090.ENSMUSP00000080302	0.318	0	0	0	0.764	0.662	0.484	0.544	0.984	>node 1 information	Pnmal2	ENSMUSG00000070802	3.4033	1.22239	2.31284	0.942956	0.315	0.297031	2.78414	Up	MGI:3645856				>node 2 information	Pgk1	ENSMUSG00000062070	23.5947	34.2451	28.9199	0.368272	0.809	0.297932	-1.45139	Down	MGI:97555
>interaction	Lsm7	Snrpd2	10090.ENSMUSP00000044993	10090.ENSMUSP00000037597	0	0	0	0	0.518	0.902	0	0.691	0.984	>node 1 information	Lsm7	ENSMUSG00000035215	28.9878	8.64007	18.8139	1.08152	0.685	0.740844	3.35504	Up	MGI:1913344				>node 2 information	Snrpd2	ENSMUSG00000040824	48.1126	97.5585	72.8355	0.67887	0.981	0.665972	-2.02771	Down	MGI:98345
>interaction	Srsf5	Srsf2	10090.ENSMUSP00000105981	10090.ENSMUSP00000090059	0	0	0	0	0.18	0.316	0.918	0.684	0.983	>node 1 information	Srsf5	ENSMUSG00000021134	20.2171	30.6718	25.4444	0.410883	0.774	0.318024	-1.51712	Down	MGI:98287				>node 2 information	Srsf2	ENSMUSG00000034120	58.934	85.9297	72.4318	0.372705	0.981	0.365623	-1.45807	Down	MGI:98284
>interaction	Csnk1e	Dvl2	10090.ENSMUSP00000113341	10090.ENSMUSP00000019362	0	0	0	0	0.055	0.553	0.925	0.53	0.983	>node 1 information	Csnk1e	ENSMUSG00000022433	60.3353	41.6457	50.9905	0.366531	0.943	0.345639	1.44878	Up	MGI:1351660				>node 2 information	Dvl2	ENSMUSG00000020888	54.7571	39.3269	47.042	0.328009	0.93	0.305048	1.39236	Up	MGI:106613	cell proliferation
>interaction	Srsf3	Srsf7	10090.ENSMUSP00000117045	10090.ENSMUSP00000070983	0	0	0	0.92	0.646	0.554	0.9	0.747	0.983	>node 1 information	Srsf3	ENSMUSG00000071172	29.2949	42.2882	35.7916	0.363027	0.871	0.316197	-1.44353	Down	MGI:98285				>node 2 information	Srsf7	ENSMUSG00000024097	37.097	50.8106	43.9538	0.312	0.916	0.285792	-1.36967	Down	MGI:1926232
>interaction	Ncor2	Hdac2	10090.ENSMUSP00000083250	10090.ENSMUSP00000019911	0	0	0	0	0.069	0.286	0.941	0.616	0.983	>node 1 information	Ncor2	ENSMUSG00000029478	77.2072	56.488	66.8476	0.309947	0.974	0.301888	1.36679	Up	MGI:1337080	cell proliferation;cell differentiation			>node 2 information	Hdac2	ENSMUSG00000019777	62.0497	84.1093	73.0795	0.301858	0.981	0.296122	-1.35552	Down	MGI:1097691	cell proliferation;cell differentiation
>interaction	Gmps	Hprt	10090.ENSMUSP00000029405	10090.ENSMUSP00000026723	0.493	0	0	0	0.176	0	0.9	0.65	0.983	>node 1 information	Gmps	ENSMUSG00000027823	30.2407	41.7003	35.9705	0.318583	0.871	0.277486	-1.37895	Down	MGI:2448526				>node 2 information	Hprt	ENSMUSG00000025630	29.9106	41.64	35.7753	0.327863	0.87	0.285241	-1.39215	Down	MGI:96217	cell proliferation;cell differentiation
>interaction	Ppp1cc	Cdk1	10090.ENSMUSP00000099587	10090.ENSMUSP00000020099	0	0	0	0	0.094	0.433	0.921	0.606	0.982	>node 1 information	Ppp1cc	ENSMUSG00000004455	31.299	43.4603	37.3796	0.325345	0.88	0.286304	-1.38855	Down	MGI:104872	cell differentiation	abnormal male fertility		>node 2 information	Cdk1	ENSMUSG00000019942	57.6102	40.4389	49.0245	0.350259	0.936	0.327843	1.42462	Up	MGI:88351	cell proliferation;cell differentiation
>interaction	Srsf6	Srsf3	10090.ENSMUSP00000119065	10090.ENSMUSP00000117045	0	0	0	0.768	0.364	0.683	0.9	0.828	0.982	>node 1 information	Srsf6	ENSMUSG00000016921	38.555	52.7262	45.6406	0.310495	0.923	0.286587	-1.36756	Down	MGI:1915246	cell proliferation;cell differentiation			>node 2 information	Srsf3	ENSMUSG00000071172	29.2949	42.2882	35.7916	0.363027	0.871	0.316197	-1.44353	Down	MGI:98285
>interaction	Srsf6	Srsf7	10090.ENSMUSP00000119065	10090.ENSMUSP00000070983	0	0	0	0.694	0.343	0.683	0.9	0.696	0.982	>node 1 information	Srsf6	ENSMUSG00000016921	38.555	52.7262	45.6406	0.310495	0.923	0.286587	-1.36756	Down	MGI:1915246	cell proliferation;cell differentiation			>node 2 information	Srsf7	ENSMUSG00000024097	37.097	50.8106	43.9538	0.312	0.916	0.285792	-1.36967	Down	MGI:1926232
>interaction	Eif1ax	Eif5	10090.ENSMUSP00000084387	10090.ENSMUSP00000061616	0.318	0	0	0	0.245	0.36	0.931	0.34	0.982	>node 1 information	Eif1ax	ENSMUSG00000067194	11.7703	18.7653	15.2678	0.458154	0.631	0.289095	-1.59429	Down	MGI:1913485				>node 2 information	Eif5	ENSMUSG00000021282	38.5019	56.851	47.6765	0.384867	0.932	0.358696	-1.47658	Down	MGI:95309
>interaction	Smarca5	Hdac2	10090.ENSMUSP00000044361	10090.ENSMUSP00000019911	0	0	0	0	0.267	0.392	0.911	0.555	0.98	>node 1 information	Smarca5	ENSMUSG00000031715	17.5076	26.9327	22.2202	0.424169	0.735	0.311764	-1.53834	Down	MGI:1935129				>node 2 information	Hdac2	ENSMUSG00000019777	62.0497	84.1093	73.0795	0.301858	0.981	0.296122	-1.35552	Down	MGI:1097691	cell proliferation;cell differentiation
>interaction	Sycp2	Sycp1	10090.ENSMUSP00000079909	10090.ENSMUSP00000029448	0	0	0	0	0.127	0	0.9	0.795	0.98	>node 1 information	Sycp2	ENSMUSG00000060445	10.1192	23.1841	16.6517	0.784601	0.653	0.512344	-2.2911	Down	MGI:1933281		abnormal male fertility		>node 2 information	Sycp1	ENSMUSG00000027855	19.1842	41.0587	30.1214	0.72621	0.821	0.596218	-2.14024	Down	MGI:105931	cell differentiation	abnormal male fertility
>interaction	Anapc10	Cdk1	10090.ENSMUSP00000048244	10090.ENSMUSP00000020099	0	0	0	0	0.125	0.681	0.9	0.381	0.98	>node 1 information	Anapc10	ENSMUSG00000036977	9.24782	16.1556	12.7017	0.543846	0.583	0.317062	-1.74696	Down	MGI:1916249				>node 2 information	Cdk1	ENSMUSG00000019942	57.6102	40.4389	49.0245	0.350259	0.936	0.327843	1.42462	Up	MGI:88351	cell proliferation;cell differentiation
>interaction	Aldh1a2	Cyp26a1	10090.ENSMUSP00000034723	10090.ENSMUSP00000025946	0	0	0	0	0.049	0.106	0.9	0.796	0.98	>node 1 information	Aldh1a2	ENSMUSG00000013584	27.7565	40.2735	34.015	0.367985	0.855	0.314627	-1.45096	Down	MGI:107928	cell proliferation;cell differentiation			>node 2 information	Cyp26a1	ENSMUSG00000024987	3.11557	7.43845	5.27701	0.819191	0.41	0.335868	-2.38751	Down	MGI:1096359	cell differentiation
>interaction	Ndufa3	Ndufc1	10090.ENSMUSP00000075953	10090.ENSMUSP00000038463	0	0	0	0	0.474	0.488	0.9	0.358	0.98	>node 1 information	Ndufa3	ENSMUSG00000035674	119.371	159.297	139.334	0.286549	0.999	0.286262	-1.33447	Down	MGI:1913341				>node 2 information	Ndufc1	ENSMUSG00000037152	13.8353	23.2951	18.5652	0.509545	0.681	0.347	-1.68374	Down	MGI:1913627
>interaction	Hprt	Adss	10090.ENSMUSP00000026723	10090.ENSMUSP00000016105	0.318	0	0	0	0.17	0	0.946	0.432	0.98	>node 1 information	Hprt	ENSMUSG00000025630	29.9106	41.64	35.7753	0.327863	0.87	0.285241	-1.39215	Down	MGI:96217	cell proliferation;cell differentiation			>node 2 information	Adss	ENSMUSG00000015961	43.4678	60.8084	52.1381	0.33259	0.946	0.31463	-1.39893	Down	MGI:87948
>interaction	Sycp1	Sycp3	10090.ENSMUSP00000029448	10090.ENSMUSP00000020252	0	0	0	0	0.126	0	0.9	0.794	0.98	>node 1 information	Sycp1	ENSMUSG00000027855	19.1842	41.0587	30.1214	0.72621	0.821	0.596218	-2.14024	Down	MGI:105931	cell differentiation	abnormal male fertility		>node 2 information	Sycp3	ENSMUSG00000020059	24.6262	56.2319	40.429	0.781757	0.898	0.702018	-2.28342	Down	MGI:109542	cell differentiation	abnormal male fertility
>interaction	Impdh1	Gmpr	10090.ENSMUSP00000077289	10090.ENSMUSP00000000260	0.2	0	0.285	0.729	0.059	0.674	0.921	0.238	0.98	>node 1 information	Impdh1	ENSMUSG00000003500	31.429	22.2511	26.8401	0.341948	0.789	0.269797	1.41247	Up	MGI:96567	cell proliferation			>node 2 information	Gmpr	ENSMUSG00000000253	18.397	11.1919	14.7944	0.487014	0.622	0.302923	1.64378	Up	MGI:1913605
>interaction	Myh11	Acta2	10090.ENSMUSP00000087756	10090.ENSMUSP00000048218	0	0	0	0	0.403	0.514	0.8	0.706	0.98	>node 1 information	Myh11	ENSMUSG00000018830	3.23215	0.928521	2.08034	1.10734	0.305	0.337737	3.48097	Up	MGI:102643	cell differentiation			>node 2 information	Acta2	ENSMUSG00000035783	12.036	6.76842	9.40221	0.560249	0.512	0.286848	1.77826	Up	MGI:87909
>interaction	Rbbp4	Chaf1b	10090.ENSMUSP00000099658	10090.ENSMUSP00000023666	0	0	0	0	0.16	0.821	0.72	0.567	0.979	>node 1 information	Rbbp4	ENSMUSG00000057236	103.011	139.545	121.278	0.301242	0.997	0.300338	-1.35466	Down	MGI:1194912				>node 2 information	Chaf1b	ENSMUSG00000022945	31.8271	18.2411	25.0341	0.5427	0.77	0.417879	1.7448	Up	MGI:1314881
>interaction	Sirt1	Pparg	10090.ENSMUSP00000020257	10090.ENSMUSP00000000450	0	0	0	0	0	0.537	0.838	0.747	0.979	>node 1 information	Sirt1	ENSMUSG00000020063	19.5441	31.9323	25.7382	0.481316	0.777	0.373982	-1.63386	Down	MGI:2135607	cell proliferation;cell differentiation	abnormal male fertility;abnormal spermatogenesis		>node 2 information	Pparg	ENSMUSG00000000440	0.886802	3.31489	2.10085	1.15577	0.307	0.35482	-3.73803	Down	MGI:97747	cell proliferation;cell differentiation
>interaction	Ube2c	Anapc10	10090.ENSMUSP00000085581	10090.ENSMUSP00000048244	0	0	0	0	0.125	0.742	0.9	0.189	0.979	>node 1 information	Ube2c	ENSMUSG00000001403	47.8028	33.7011	40.752	0.346037	0.9	0.311434	1.41843	Up	MGI:1915862				>node 2 information	Anapc10	ENSMUSG00000036977	9.24782	16.1556	12.7017	0.543846	0.583	0.317062	-1.74696	Down	MGI:1916249
>interaction	Acad8	Hadhb	10090.ENSMUSP00000054370	10090.ENSMUSP00000026841	0.318	0	0	0	0.314	0	0.946	0.238	0.978	>node 1 information	Acad8	ENSMUSG00000031969	10.2233	19.9453	15.0843	0.644511	0.629	0.405398	-1.95096	Down	MGI:1914198				>node 2 information	Hadhb	ENSMUSG00000059447	12.536	21.3069	16.9215	0.51833	0.658	0.341061	-1.69966	Down	MGI:2136381
>interaction	Aldh1a7	Adh1	10090.ENSMUSP00000025656	10090.ENSMUSP00000004232	0.07	0	0	0	0.176	0.113	0.946	0.493	0.978	>node 1 information	Aldh1a7	ENSMUSG00000024747	5.35988	10.4797	7.91979	0.646459	0.476	0.307715	-1.95521	Down	MGI:1347050				>node 2 information	Adh1	ENSMUSG00000074207	28.7479	10.0193	19.3836	0.966209	0.695	0.671515	2.86925	Up	MGI:87921
>interaction	Mcm8	Orc5	10090.ENSMUSP00000066842	10090.ENSMUSP00000030872	0	0	0	0	0.268	0.319	0.936	0.414	0.978	>node 1 information	Mcm8	ENSMUSG00000027353	15.6926	25.9249	20.8087	0.491731	0.716	0.352079	-1.65205	Down	MGI:1913884		abnormal male fertility		>node 2 information	Orc5	ENSMUSG00000029012	32.0778	44.1858	38.1318	0.31753	0.885	0.281014	-1.37746	Down	MGI:1347044
>interaction	Ppp1cc	Ppp1r2	10090.ENSMUSP00000099587	10090.ENSMUSP00000060118	0	0	0	0	0.052	0.937	0.54	0.323	0.978	>node 1 information	Ppp1cc	ENSMUSG00000004455	31.299	43.4603	37.3796	0.325345	0.88	0.286304	-1.38855	Down	MGI:104872	cell differentiation	abnormal male fertility		>node 2 information	Ppp1r2	ENSMUSG00000047714	11.8767	27.8198	19.8483	0.80325	0.702	0.563881	-2.34238	Down	MGI:1914099
>interaction	Top2a	Smc4	10090.ENSMUSP00000068896	10090.ENSMUSP00000047872	0	0	0	0	0.914	0.411	0	0.597	0.977	>node 1 information	Top2a	ENSMUSG00000020914	47.0462	64.8343	55.9402	0.317984	0.955	0.303675	-1.3781	Down	MGI:98790	cell differentiation			>node 2 information	Smc4	ENSMUSG00000034349	22.8962	42.0519	32.474	0.589877	0.842	0.496677	-1.83663	Down	MGI:1917349
>interaction	Npm1	Ncl	10090.ENSMUSP00000075067	10090.ENSMUSP00000027438	0	0	0	0	0.586	0.547	0.528	0.772	0.977	>node 1 information	Npm1	ENSMUSG00000057113	16.4493	24.2	20.3246	0.381345	0.709	0.270373	-1.47119	Down	MGI:106184	cell proliferation			>node 2 information	Ncl	ENSMUSG00000026234	70.1955	101.849	86.0222	0.367969	0.989	0.363921	-1.45093	Down	MGI:97286
>interaction	Esf1	Nop58	10090.ENSMUSP00000036523	10090.ENSMUSP00000027174	0	0	0	0	0.856	0.749	0	0.428	0.977	>node 1 information	Esf1	ENSMUSG00000045624	21.234	33.9415	27.5877	0.460621	0.797	0.367115	-1.59845	Down	MGI:1913830				>node 2 information	Nop58	ENSMUSG00000026020	38.1776	55.3223	46.7499	0.366732	0.929	0.340694	-1.44908	Down	MGI:1933184
>interaction	Msn	Slc9a3r1	10090.ENSMUSP00000113071	10090.ENSMUSP00000021077	0	0	0	0	0	0.825	0.397	0.803	0.977	>node 1 information	Msn	ENSMUSG00000031207	15.1575	7.9161	11.5368	0.627678	0.56	0.3515	1.91477	Up	MGI:97167	cell proliferation;cell differentiation			>node 2 information	Slc9a3r1	ENSMUSG00000020733	26.8785	17.837	22.3577	0.404401	0.737	0.298044	1.5069	Up	MGI:1349482	cell proliferation;cell differentiation
>interaction	Aldh1a2	Adh1	10090.ENSMUSP00000034723	10090.ENSMUSP00000004232	0.07	0	0	0	0.055	0.113	0.946	0.522	0.976	>node 1 information	Aldh1a2	ENSMUSG00000013584	27.7565	40.2735	34.015	0.367985	0.855	0.314627	-1.45096	Down	MGI:107928	cell proliferation;cell differentiation			>node 2 information	Adh1	ENSMUSG00000074207	28.7479	10.0193	19.3836	0.966209	0.695	0.671515	2.86925	Up	MGI:87921
>interaction	Srsf3	Srsf5	10090.ENSMUSP00000117045	10090.ENSMUSP00000105981	0	0	0	0.795	0.168	0.683	0.9	0.676	0.975	>node 1 information	Srsf3	ENSMUSG00000071172	29.2949	42.2882	35.7916	0.363027	0.871	0.316197	-1.44353	Down	MGI:98285				>node 2 information	Srsf5	ENSMUSG00000021134	20.2171	30.6718	25.4444	0.410883	0.774	0.318024	-1.51712	Down	MGI:98287
>interaction	Rnf20	Ube2b	10090.ENSMUSP00000029989	10090.ENSMUSP00000020657	0	0	0	0	0.077	0.786	0.72	0.606	0.975	>node 1 information	Rnf20	ENSMUSG00000028309	24.1913	33.7682	28.9797	0.330469	0.81	0.26768	-1.39588	Down	MGI:1925927				>node 2 information	Ube2b	ENSMUSG00000020390	23.5406	37.2204	30.3805	0.450282	0.823	0.370582	-1.58112	Down	MGI:102944	cell differentiation	abnormal male fertility;abnormal spermatogenesis
>interaction	Picalm	Bin1	10090.ENSMUSP00000051092	10090.ENSMUSP00000025239	0	0	0	0	0	0	0.95	0.529	0.975	>node 1 information	Picalm	ENSMUSG00000039361	33.0181	46.863	39.9406	0.346638	0.895	0.310241	-1.41931	Down	MGI:2385902	cell proliferation;cell differentiation			>node 2 information	Bin1	ENSMUSG00000024381	19.4043	10.6341	15.0192	0.583933	0.628	0.36671	1.82472	Up	MGI:108092	cell differentiation
>interaction	Shfm1	Psmd6	10090.ENSMUSP00000040741	10090.ENSMUSP00000022256	0	0	0	0	0.171	0.956	0.36	0.092	0.975	>node 1 information	Shfm1	ENSMUSG00000042541	43.394	60.2521	51.8231	0.325301	0.945	0.30741	-1.38849	Down	MGI:109238				>node 2 information	Psmd6	ENSMUSG00000021737	40.3639	54.0615	47.2127	0.290125	0.93	0.269817	-1.33935	Down	MGI:1913663
>interaction	Srsf5	Srsf7	10090.ENSMUSP00000105981	10090.ENSMUSP00000070983	0	0	0	0.718	0.173	0.683	0.9	0.505	0.975	>node 1 information	Srsf5	ENSMUSG00000021134	20.2171	30.6718	25.4444	0.410883	0.774	0.318024	-1.51712	Down	MGI:98287				>node 2 information	Srsf7	ENSMUSG00000024097	37.097	50.8106	43.9538	0.312	0.916	0.285792	-1.36967	Down	MGI:1926232
>interaction	Acsl6	Acad8	10090.ENSMUSP00000104532	10090.ENSMUSP00000054370	0.318	0	0	0	0.269	0.102	0.946	0.134	0.975	>node 1 information	Acsl6	ENSMUSG00000020333	1.88931	6.87436	4.38183	1.13766	0.386	0.439138	-3.63856	Down	MGI:894291	cell proliferation;cell differentiation			>node 2 information	Acad8	ENSMUSG00000031969	10.2233	19.9453	15.0843	0.644511	0.629	0.405398	-1.95096	Down	MGI:1914198
>interaction	Mnat1	Cdk1	10090.ENSMUSP00000021523	10090.ENSMUSP00000020099	0	0	0	0	0.054	0.26	0.95	0.358	0.974	>node 1 information	Mnat1	ENSMUSG00000021103	15.9166	6.77796	11.3473	0.80536	0.556	0.44778	2.34829	Up	MGI:106207	cell proliferation	abnormal spermatogenesis		>node 2 information	Cdk1	ENSMUSG00000019942	57.6102	40.4389	49.0245	0.350259	0.936	0.327843	1.42462	Up	MGI:88351	cell proliferation;cell differentiation
>interaction	Srsf2	Hnrnph1	10090.ENSMUSP00000090059	10090.ENSMUSP00000070503	0	0	0	0	0.269	0.26	0.9	0.578	0.974	>node 1 information	Srsf2	ENSMUSG00000034120	58.934	85.9297	72.4318	0.372705	0.981	0.365623	-1.45807	Down	MGI:98284				>node 2 information	Hnrnph1	ENSMUSG00000007850	59.2193	84.1137	71.6665	0.347365	0.98	0.340417	-1.42038	Down	MGI:1891925
>interaction	Jun	Egr2	10090.ENSMUSP00000054270	10090.ENSMUSP00000041053	0	0	0	0	0.121	0.115	0.908	0.683	0.974	>node 1 information	Jun	ENSMUSG00000052684	51.1912	37.6828	44.437	0.30399	0.917	0.278759	1.35848	Up	MGI:96646	cell proliferation;cell differentiation			>node 2 information	Egr2	ENSMUSG00000037868	16.8282	8.77512	12.8017	0.629065	0.585	0.368003	1.91772	Up	MGI:95296	cell differentiation
>interaction	Ppcs	Pank3	10090.ENSMUSP00000030385	10090.ENSMUSP00000018990	0	0	0	0	0.117	0	0.946	0.485	0.973	>node 1 information	Ppcs	ENSMUSG00000028636	8.70406	16.7217	12.7129	0.630671	0.583	0.367681	-1.92114	Down	MGI:1915237				>node 2 information	Pank3	ENSMUSG00000018846	17.2266	32.3919	24.8092	0.611276	0.768	0.46946	-1.88034	Down	MGI:2387464
>interaction	Nop58	Pwp1	10090.ENSMUSP00000027174	10090.ENSMUSP00000001836	0	0	0	0	0.954	0.422	0	0.06	0.973	>node 1 information	Nop58	ENSMUSG00000026020	38.1776	55.3223	46.7499	0.366732	0.929	0.340694	-1.44908	Down	MGI:1933184				>node 2 information	Pwp1	ENSMUSG00000001785	34.152	47.5857	40.8689	0.328703	0.901	0.296161	-1.39335	Down	MGI:1914735	cell differentiation
>interaction	Snrpd2	Phf5a	10090.ENSMUSP00000037597	10090.ENSMUSP00000023117	0	0	0	0	0.409	0.572	0.9	0.047	0.972	>node 1 information	Snrpd2	ENSMUSG00000040824	48.1126	97.5585	72.8355	0.67887	0.981	0.665972	-2.02771	Down	MGI:98345				>node 2 information	Phf5a	ENSMUSG00000061360	48.8673	67.1986	58.0329	0.315877	0.961	0.303558	-1.37512	Down	MGI:2156864
>interaction	Mrpl14	Mrpl40	10090.ENSMUSP00000024734	10090.ENSMUSP00000023391	0	0	0	0	0.438	0.554	0.9	0	0.972	>node 1 information	Mrpl14	ENSMUSG00000023939	65.4754	43.0308	54.2531	0.413702	0.952	0.393844	1.52159	Up	MGI:1333864				>node 2 information	Mrpl40	ENSMUSG00000022706	25.7857	17.1568	21.4713	0.401882	0.725	0.291364	1.50294	Up	MGI:1332635
>interaction	Col1a2	Col6a1	10090.ENSMUSP00000031668	10090.ENSMUSP00000001147	0	0	0	0.618	0.639	0.105	0.9	0.477	0.97	>node 1 information	Col1a2	ENSMUSG00000029661	7.73864	3.26641	5.50253	0.81276	0.416	0.338108	2.36916	Up	MGI:88468				>node 2 information	Col6a1	ENSMUSG00000001119	9.71911	2.2577	5.98841	1.24598	0.428	0.533278	4.30487	Up	MGI:88459
>interaction	Xpo1	Cdk1	10090.ENSMUSP00000020538	10090.ENSMUSP00000020099	0	0	0	0	0.092	0.054	0.95	0.391	0.97	>node 1 information	Xpo1	ENSMUSG00000020290	43.3663	69.5431	56.4547	0.463678	0.957	0.44374	-1.60362	Down	MGI:2144013				>node 2 information	Cdk1	ENSMUSG00000019942	57.6102	40.4389	49.0245	0.350259	0.936	0.327843	1.42462	Up	MGI:88351	cell proliferation;cell differentiation
>interaction	Ccne2	Cdk1	10090.ENSMUSP00000103960	10090.ENSMUSP00000020099	0	0	0	0	0.366	0.788	0.528	0.57	0.969	>node 1 information	Ccne2	ENSMUSG00000028212	9.17713	18.8589	14.018	0.690666	0.609	0.420616	-2.05499	Down	MGI:1329034		abnormal male fertility;abnormal spermatogenesis		>node 2 information	Cdk1	ENSMUSG00000019942	57.6102	40.4389	49.0245	0.350259	0.936	0.327843	1.42462	Up	MGI:88351	cell proliferation;cell differentiation
>interaction	Srsf5	Hnrnph1	10090.ENSMUSP00000105981	10090.ENSMUSP00000070503	0	0	0	0	0.317	0.219	0.9	0.49	0.969	>node 1 information	Srsf5	ENSMUSG00000021134	20.2171	30.6718	25.4444	0.410883	0.774	0.318024	-1.51712	Down	MGI:98287				>node 2 information	Hnrnph1	ENSMUSG00000007850	59.2193	84.1137	71.6665	0.347365	0.98	0.340417	-1.42038	Down	MGI:1891925
>interaction	Col1a2	Col6a2	10090.ENSMUSP00000031668	10090.ENSMUSP00000001181	0	0	0	0.614	0.563	0.047	0.919	0.442	0.969	>node 1 information	Col1a2	ENSMUSG00000029661	7.73864	3.26641	5.50253	0.81276	0.416	0.338108	2.36916	Up	MGI:88468				>node 2 information	Col6a2	ENSMUSG00000020241	9.87511	3.93759	6.90635	0.859719	0.453	0.389453	2.50791	Up	MGI:88460
>interaction	Hsd3b1	Hsd17b3	10090.ENSMUSP00000102630	10090.ENSMUSP00000044217	0	0	0	0	0.125	0	0.9	0.679	0.969	>node 1 information	Hsd3b1	ENSMUSG00000027871	37.3743	13.6483	25.5113	0.930019	0.775	0.720765	2.73839	Up	MGI:96233				>node 2 information	Hsd17b3	ENSMUSG00000033122	54.9509	32.9386	43.9447	0.500909	0.916	0.458832	1.66828	Up	MGI:107177
>interaction	Atp5f1	Atp5k	10090.ENSMUSP00000113022	10090.ENSMUSP00000051222	0	0	0	0	0.232	0.554	0.9	0.223	0.969	>node 1 information	Atp5f1	ENSMUSG00000000563	40.9042	66.2147	53.5594	0.472568	0.95	0.44894	-1.61878	Down	MGI:1100495				>node 2 information	Atp5k	ENSMUSG00000050856	4.35634	29.741	17.0487	1.48895	0.659	0.98122	-6.82706	Down	MGI:106636
>interaction	Gmps	Nmd3	10090.ENSMUSP00000029405	10090.ENSMUSP00000029358	0	0	0	0	0.969	0	0	0	0.969	>node 1 information	Gmps	ENSMUSG00000027823	30.2407	41.7003	35.9705	0.318583	0.871	0.277486	-1.37895	Down	MGI:2448526				>node 2 information	Nmd3	ENSMUSG00000027787	38.0929	51.5293	44.8111	0.299845	0.919	0.275558	-1.35273	Down	MGI:2140103
>interaction	Vamp3	Stx12	10090.ENSMUSP00000030797	10090.ENSMUSP00000030698	0	0	0	0	0.099	0.689	0.72	0.647	0.968	>node 1 information	Vamp3	ENSMUSG00000028955	26.1553	43.0929	34.6241	0.489185	0.86	0.420699	-1.64758	Down	MGI:1321389	cell differentiation			>node 2 information	Stx12	ENSMUSG00000028879	21.6135	35.9713	28.7924	0.498666	0.809	0.403421	-1.6643	Down	MGI:1931027
>interaction	Bmi1	Suz12	10090.ENSMUSP00000028071	10090.ENSMUSP00000017692	0	0	0	0	0.111	0.059	0.9	0.671	0.968	>node 1 information	Bmi1	ENSMUSG00000026739	17.039	25.2217	21.1303	0.387249	0.721	0.279206	-1.48023	Down	MGI:88174	cell proliferation;cell differentiation			>node 2 information	Suz12	ENSMUSG00000017548	25.5889	40.6406	33.1148	0.454532	0.848	0.385443	-1.58821	Down	MGI:1261758	cell proliferation;cell differentiation
>interaction	Srsf6	Hnrnph1	10090.ENSMUSP00000119065	10090.ENSMUSP00000070503	0	0	0	0	0.287	0.219	0.9	0.495	0.968	>node 1 information	Srsf6	ENSMUSG00000016921	38.555	52.7262	45.6406	0.310495	0.923	0.286587	-1.36756	Down	MGI:1915246	cell proliferation;cell differentiation			>node 2 information	Hnrnph1	ENSMUSG00000007850	59.2193	84.1137	71.6665	0.347365	0.98	0.340417	-1.42038	Down	MGI:1891925
>interaction	Eps15	Bin1	10090.ENSMUSP00000099790	10090.ENSMUSP00000025239	0	0	0	0	0	0	0.95	0.388	0.968	>node 1 information	Eps15	ENSMUSG00000028552	34.5706	56.7453	45.6579	0.48567	0.923	0.448273	-1.64143	Down	MGI:104583	cell proliferation			>node 2 information	Bin1	ENSMUSG00000024381	19.4043	10.6341	15.0192	0.583933	0.628	0.36671	1.82472	Up	MGI:108092	cell differentiation
>interaction	Vasp	Fblim1	10090.ENSMUSP00000032561	10090.ENSMUSP00000006381	0	0	0	0	0.055	0.047	0.921	0.605	0.968	>node 1 information	Vasp	ENSMUSG00000030403	28.6723	19.4157	24.044	0.384986	0.758	0.291819	1.47676	Up	MGI:109268	cell differentiation			>node 2 information	Fblim1	ENSMUSG00000006219	5.15086	2.09735	3.62411	0.842556	0.362	0.305005	2.45589	Up	MGI:1921452
>interaction	Hsd17b3	Cyp17a1	10090.ENSMUSP00000044217	10090.ENSMUSP00000026012	0	0	0	0	0.076	0.046	0.9	0.677	0.967	>node 1 information	Hsd17b3	ENSMUSG00000033122	54.9509	32.9386	43.9447	0.500909	0.916	0.458832	1.66828	Up	MGI:107177				>node 2 information	Cyp17a1	ENSMUSG00000003555	21.2939	6.61454	13.9542	1.05197	0.607	0.638543	3.21926	Up	MGI:88586		abnormal male fertility
>interaction	Lama3	Lamb1	10090.ENSMUSP00000089703	10090.ENSMUSP00000002979	0	0	0	0.623	0.227	0.049	0.95	0.475	0.967	>node 1 information	Lama3	ENSMUSG00000024421	14.913	8.62674	11.7699	0.534098	0.565	0.301765	1.72869	Up	MGI:99909				>node 2 information	Lamb1	ENSMUSG00000002900	39.1806	27.4569	33.3188	0.351865	0.85	0.299085	1.42699	Up	MGI:96743	cell differentiation
>interaction	Naa50	Naa15	10090.ENSMUSP00000070140	10090.ENSMUSP00000029303	0	0	0	0	0.383	0.876	0.36	0.408	0.967	>node 1 information	Naa50	ENSMUSG00000022698	12.1031	19.3743	15.7387	0.461995	0.64	0.295677	-1.60077	Down	MGI:1919367				>node 2 information	Naa15	ENSMUSG00000063273	21.5612	31.4926	26.5269	0.37439	0.786	0.29427	-1.46061	Down	MGI:1922088	cell differentiation
>interaction	Ccne2	Skp1a	10090.ENSMUSP00000103960	10090.ENSMUSP00000038744	0	0	0	0	0.05	0.677	0.9	0.055	0.967	>node 1 information	Ccne2	ENSMUSG00000028212	9.17713	18.8589	14.018	0.690666	0.609	0.420616	-2.05499	Down	MGI:1329034		abnormal male fertility;abnormal spermatogenesis		>node 2 information	Skp1a	ENSMUSG00000036309	50.0088	80.2426	65.1257	0.464238	0.972	0.451239	-1.60457	Down	MGI:103575
>interaction	Smc1b	Sycp3	10090.ENSMUSP00000023068	10090.ENSMUSP00000020252	0	0	0	0	0.141	0.102	0.9	0.622	0.967	>node 1 information	Smc1b	ENSMUSG00000022432	31.3255	53.9162	42.6208	0.530039	0.909	0.481805	-1.72116	Down	MGI:2154049		abnormal male fertility		>node 2 information	Sycp3	ENSMUSG00000020059	24.6262	56.2319	40.429	0.781757	0.898	0.702018	-2.28342	Down	MGI:109542	cell differentiation	abnormal male fertility
>interaction	Shfm1	Psma6	10090.ENSMUSP00000040741	10090.ENSMUSP00000021412	0	0	0	0	0.122	0.965	0	0	0.967	>node 1 information	Shfm1	ENSMUSG00000042541	43.394	60.2521	51.8231	0.325301	0.945	0.30741	-1.38849	Down	MGI:109238				>node 2 information	Psma6	ENSMUSG00000021024	49.725	69.4944	59.6097	0.331647	0.963	0.319376	-1.39757	Down	MGI:1347006
>interaction	Canx	Hsp90b1	10090.ENSMUSP00000020637	10090.ENSMUSP00000020238	0	0	0	0	0.772	0.411	0	0.777	0.967	>node 1 information	Canx	ENSMUSG00000020368	40.6854	58.0446	49.365	0.35165	0.938	0.329848	-1.42667	Down	MGI:88261				>node 2 information	Hsp90b1	ENSMUSG00000020048	91.776	128.922	110.349	0.336623	0.996	0.335276	-1.40475	Down	MGI:98817
>interaction	Fxyd2	Atp1b3	10090.ENSMUSP00000035429	10090.ENSMUSP00000034983	0	0	0	0	0	0.68	0.9	0.077	0.967	>node 1 information	Fxyd2	ENSMUSG00000059412	8.92973	3.94529	6.43751	0.774281	0.439	0.339909	2.26339	Up	MGI:1195260				>node 2 information	Atp1b3	ENSMUSG00000032412	43.4348	62.6335	53.0341	0.362006	0.948	0.343182	-1.44201	Down	MGI:107788
>interaction	Srsf7	Hnrnph1	10090.ENSMUSP00000070983	10090.ENSMUSP00000070503	0	0	0	0	0.422	0.11	0.9	0.401	0.965	>node 1 information	Srsf7	ENSMUSG00000024097	37.097	50.8106	43.9538	0.312	0.916	0.285792	-1.36967	Down	MGI:1926232				>node 2 information	Hnrnph1	ENSMUSG00000007850	59.2193	84.1137	71.6665	0.347365	0.98	0.340417	-1.42038	Down	MGI:1891925
>interaction	Arpc5	Nckap1	10090.ENSMUSP00000076933	10090.ENSMUSP00000028386	0	0	0	0	0	0	0.95	0.329	0.965	>node 1 information	Arpc5	ENSMUSG00000008475	22.2541	35.4329	28.8435	0.456908	0.809	0.369639	-1.5922	Down	MGI:1915021				>node 2 information	Nckap1	ENSMUSG00000027002	39.1061	57.3872	48.2467	0.378909	0.934	0.353901	-1.46747	Down	MGI:1355333
>interaction	Sycp1	Smc1b	10090.ENSMUSP00000029448	10090.ENSMUSP00000023068	0	0	0	0	0.129	0	0.9	0.62	0.964	>node 1 information	Sycp1	ENSMUSG00000027855	19.1842	41.0587	30.1214	0.72621	0.821	0.596218	-2.14024	Down	MGI:105931	cell differentiation	abnormal male fertility		>node 2 information	Smc1b	ENSMUSG00000022432	31.3255	53.9162	42.6208	0.530039	0.909	0.481805	-1.72116	Down	MGI:2154049		abnormal male fertility
>interaction	Polr3g	Polr3h	10090.ENSMUSP00000035289	10090.ENSMUSP00000023113	0	0	0	0	0.059	0.554	0.9	0.248	0.964	>node 1 information	Polr3g	ENSMUSG00000035834	38.4899	53.5582	46.0241	0.327401	0.925	0.302846	-1.39149	Down	MGI:1914736	cell proliferation			>node 2 information	Polr3h	ENSMUSG00000022476	38.2416	15.83	27.0358	0.82896	0.791	0.655707	2.41577	Up	MGI:1926179
>interaction	Mphosph8	H3f3b	10090.ENSMUSP00000112170	10090.ENSMUSP00000016703	0	0	0	0	0.053	0.795	0.72	0.416	0.964	>node 1 information	Mphosph8	ENSMUSG00000079184	21.6034	35.63	28.6167	0.490154	0.807	0.395555	-1.64928	Down	MGI:1922589				>node 2 information	H3f3b	ENSMUSG00000016559	60.638	81.5386	71.0883	0.294009	0.979	0.287835	-1.34468	Down	MGI:1101768	cell proliferation;cell differentiation	abnormal male fertility
>interaction	Ret	Grb7	10090.ENSMUSP00000032201	10090.ENSMUSP00000019456	0	0	0	0	0	0.111	0.95	0.239	0.963	>node 1 information	Ret	ENSMUSG00000030110	36.526	25.857	31.1915	0.342048	0.832	0.284584	1.41262	Up	MGI:97902	cell differentiation	abnormal male fertility;abnormal spermatogenesis	Ret	>node 2 information	Grb7	ENSMUSG00000019312	43.0385	30.7184	36.8785	0.334073	0.877	0.292982	1.40107	Up	MGI:102683
>interaction	Gmps	Pwp1	10090.ENSMUSP00000029405	10090.ENSMUSP00000001836	0	0	0	0	0.963	0	0	0	0.963	>node 1 information	Gmps	ENSMUSG00000027823	30.2407	41.7003	35.9705	0.318583	0.871	0.277486	-1.37895	Down	MGI:2448526				>node 2 information	Pwp1	ENSMUSG00000001785	34.152	47.5857	40.8689	0.328703	0.901	0.296161	-1.39335	Down	MGI:1914735	cell differentiation
>interaction	Rab11a	Arf4	10090.ENSMUSP00000129163	10090.ENSMUSP00000022429	0	0	0	0	0.123	0.378	0.9	0.413	0.963	>node 1 information	Rab11a	ENSMUSG00000004771	33.5683	56.4305	44.9994	0.508056	0.92	0.467411	-1.68107	Down	MGI:1858202	cell differentiation			>node 2 information	Arf4	ENSMUSG00000021877	29.5103	47.5103	38.5103	0.467407	0.887	0.41459	-1.60996	Down	MGI:99433
>interaction	Med13	Med21	10090.ENSMUSP00000044268	10090.ENSMUSP00000032429	0	0	0	0	0.05	0.554	0.9	0.25	0.963	>node 1 information	Med13	ENSMUSG00000034297	21.4982	31.1558	26.327	0.366833	0.783	0.28723	-1.44923	Down	MGI:3029632				>node 2 information	Med21	ENSMUSG00000030291	33.4806	53.5695	43.5251	0.461548	0.913	0.421393	-1.60002	Down	MGI:1347064
>interaction	Nphp4	Iqcb1	10090.ENSMUSP00000049920	10090.ENSMUSP00000023535	0	0	0	0	0.069	0.061	0.9	0.627	0.963	>node 1 information	Nphp4	ENSMUSG00000039577	15.0623	9.15151	12.1069	0.488216	0.572	0.27926	1.64588	Up	MGI:2384210	cell differentiation	abnormal male fertility		>node 2 information	Iqcb1	ENSMUSG00000022837	19.621	31.442	25.5315	0.462997	0.775	0.358822	-1.60247	Down	MGI:2443764	cell differentiation
>interaction	Rab11a	Exoc5	10090.ENSMUSP00000129163	10090.ENSMUSP00000125434	0	0	0	0	0	0.115	0.916	0.545	0.963	>node 1 information	Rab11a	ENSMUSG00000004771	33.5683	56.4305	44.9994	0.508056	0.92	0.467411	-1.68107	Down	MGI:1858202	cell differentiation			>node 2 information	Exoc5	ENSMUSG00000061244	7.66296	17.1815	12.4222	0.766251	0.577	0.442127	-2.24215	Down	MGI:2145645
>interaction	Parvb	Actn1	10090.ENSMUSP00000023072	10090.ENSMUSP00000021554	0	0	0	0	0.053	0	0.95	0.288	0.963	>node 1 information	Parvb	ENSMUSG00000022438	6.85027	12.6497	9.74999	0.594814	0.52	0.309303	-1.8466	Down	MGI:2153063				>node 2 information	Actn1	ENSMUSG00000015143	14.1553	7.81392	10.9846	0.577297	0.547	0.315781	1.81155	Up	MGI:2137706	cell differentiation
>interaction	Dld	Lipt1	10090.ENSMUSP00000106481	10090.ENSMUSP00000038739	0.318	0	0.257	0	0.069	0.043	0.9	0.325	0.962	>node 1 information	Dld	ENSMUSG00000020664	25.2514	39.3389	32.2951	0.436211	0.841	0.366853	-1.55789	Down	MGI:107450	cell differentiation			>node 2 information	Lipt1	ENSMUSG00000037216	0.646093	2.56839	1.60724	1.19602	0.28	0.334886	-3.97526	Down	MGI:3645211
>interaction	Rad9b	Tipin	10090.ENSMUSP00000036177	10090.ENSMUSP00000034964	0	0	0	0	0.08	0.048	0.938	0.395	0.962	>node 1 information	Rad9b	ENSMUSG00000038569	18.5285	27.3698	22.9491	0.385256	0.743	0.286245	-1.47717	Down	MGI:2385231				>node 2 information	Tipin	ENSMUSG00000032397	48.695	79.1464	63.9207	0.476393	0.969	0.461625	-1.62535	Down	MGI:1921571	cell proliferation
>interaction	Cul3	Skp1a	10090.ENSMUSP00000130738	10090.ENSMUSP00000038744	0	0	0	0	0.128	0.763	0.259	0.782	0.962	>node 1 information	Cul3	ENSMUSG00000004364	46.4411	68.4015	57.4213	0.382443	0.959	0.366763	-1.47287	Down	MGI:1347360	cell differentiation			>node 2 information	Skp1a	ENSMUSG00000036309	50.0088	80.2426	65.1257	0.464238	0.972	0.451239	-1.60457	Down	MGI:103575
>interaction	Sycp2	Smc1b	10090.ENSMUSP00000079909	10090.ENSMUSP00000023068	0	0	0	0	0.107	0	0.9	0.608	0.962	>node 1 information	Sycp2	ENSMUSG00000060445	10.1192	23.1841	16.6517	0.784601	0.653	0.512344	-2.2911	Down	MGI:1933281		abnormal male fertility		>node 2 information	Smc1b	ENSMUSG00000022432	31.3255	53.9162	42.6208	0.530039	0.909	0.481805	-1.72116	Down	MGI:2154049		abnormal male fertility
>interaction	Mrps14	Rpl19	10090.ENSMUSP00000120075	10090.ENSMUSP00000017548	0.318	0	0	0	0.813	0.692	0	0.123	0.961	>node 1 information	Mrps14	ENSMUSG00000058267	9.76211	16.5502	13.1562	0.515963	0.591	0.304934	-1.69535	Down	MGI:1928141				>node 2 information	Rpl19	ENSMUSG00000017404	16.2771	4.48338	10.3802	1.13617	0.534	0.606715	3.63054	Up	MGI:98020
>interaction	Cul3	Dvl2	10090.ENSMUSP00000130738	10090.ENSMUSP00000019362	0	0	0	0	0.052	0.111	0.95	0.184	0.961	>node 1 information	Cul3	ENSMUSG00000004364	46.4411	68.4015	57.4213	0.382443	0.959	0.366763	-1.47287	Down	MGI:1347360	cell differentiation			>node 2 information	Dvl2	ENSMUSG00000020888	54.7571	39.3269	47.042	0.328009	0.93	0.305048	1.39236	Up	MGI:106613	cell proliferation
>interaction	Hprt	Aprt	10090.ENSMUSP00000026723	10090.ENSMUSP00000006764	0.071	0	0	0	0.115	0.167	0.8	0.76	0.961	>node 1 information	Hprt	ENSMUSG00000025630	29.9106	41.64	35.7753	0.327863	0.87	0.285241	-1.39215	Down	MGI:96217	cell proliferation;cell differentiation			>node 2 information	Aprt	ENSMUSG00000006589	65.9957	46.4001	56.1979	0.348689	0.956	0.333347	1.42232	Up	MGI:88061
>interaction	Chmp5	Chmp2b	10090.ENSMUSP00000030128	10090.ENSMUSP00000004965	0	0	0	0	0.143	0.386	0.9	0.352	0.961	>node 1 information	Chmp5	ENSMUSG00000028419	21.2224	33.9507	27.5865	0.461395	0.797	0.367732	-1.59976	Down	MGI:1924209				>node 2 information	Chmp2b	ENSMUSG00000004843	13.8497	25.4036	19.6267	0.588684	0.699	0.41149	-1.83423	Down	MGI:1916192
>interaction	Srsf3	Hnrnph1	10090.ENSMUSP00000117045	10090.ENSMUSP00000070503	0	0	0	0	0.29	0.102	0.9	0.465	0.961	>node 1 information	Srsf3	ENSMUSG00000071172	29.2949	42.2882	35.7916	0.363027	0.871	0.316197	-1.44353	Down	MGI:98285				>node 2 information	Hnrnph1	ENSMUSG00000007850	59.2193	84.1137	71.6665	0.347365	0.98	0.340417	-1.42038	Down	MGI:1891925
>interaction	Arpc3	Nckap1	10090.ENSMUSP00000099584	10090.ENSMUSP00000028386	0	0	0	0	0.049	0	0.95	0.226	0.96	>node 1 information	Arpc3	ENSMUSG00000029465	57.8603	41.9539	49.9071	0.31872	0.939	0.299278	1.37914	Up	MGI:1928375				>node 2 information	Nckap1	ENSMUSG00000027002	39.1061	57.3872	48.2467	0.378909	0.934	0.353901	-1.46747	Down	MGI:1355333
>interaction	Sct	Adcyap1r1	10090.ENSMUSP00000128729	10090.ENSMUSP00000063784	0	0	0	0	0	0.077	0.9	0.607	0.96	>node 1 information	Sct	ENSMUSG00000038580	3.12958	0.172299	1.65094	1.79127	0.282	0.505139	18.1637	Up	MGI:99466				>node 2 information	Adcyap1r1	ENSMUSG00000029778	8.31049	3.88397	6.09723	0.725989	0.431	0.312901	2.13969	Up	MGI:108449	cell differentiation
>interaction	Ddx56	Pwp1	10090.ENSMUSP00000004507	10090.ENSMUSP00000001836	0	0	0	0	0.96	0	0	0	0.96	>node 1 information	Ddx56	ENSMUSG00000004393	48.5664	33.3119	40.9391	0.372614	0.901	0.335725	1.45793	Up	MGI:1277172	cell differentiation			>node 2 information	Pwp1	ENSMUSG00000001785	34.152	47.5857	40.8689	0.328703	0.901	0.296161	-1.39335	Down	MGI:1914735	cell differentiation
>interaction	Serpinh1	Col1a2	10090.ENSMUSP00000091706	10090.ENSMUSP00000031668	0	0	0	0	0.451	0	0.9	0.331	0.96	>node 1 information	Serpinh1	ENSMUSG00000070436	44.0546	21.6151	32.8349	0.683405	0.846	0.578161	2.03814	Up	MGI:88283	cell differentiation			>node 2 information	Col1a2	ENSMUSG00000029661	7.73864	3.26641	5.50253	0.81276	0.416	0.338108	2.36916	Up	MGI:88468
>interaction	Nckap1	Actr3	10090.ENSMUSP00000028386	10090.ENSMUSP00000027579	0	0	0	0	0.051	0.115	0.941	0.295	0.96	>node 1 information	Nckap1	ENSMUSG00000027002	39.1061	57.3872	48.2467	0.378909	0.934	0.353901	-1.46747	Down	MGI:1355333				>node 2 information	Actr3	ENSMUSG00000026341	31.0107	50.3094	40.66	0.474635	0.899	0.426697	-1.62232	Down	MGI:1921367	cell differentiation
>interaction	Yes1	Epha2	10090.ENSMUSP00000072154	10090.ENSMUSP00000006614	0	0	0	0.777	0.071	0.167	0.95	0.119	0.959	>node 1 information	Yes1	ENSMUSG00000014932	11.5126	19.1687	15.3407	0.499073	0.633	0.315913	-1.66502	Down	MGI:99147	cell proliferation;cell differentiation			>node 2 information	Epha2	ENSMUSG00000006445	22.9391	11.3933	17.1662	0.672589	0.661	0.444581	2.01339	Up	MGI:95278	cell proliferation;cell differentiation
>interaction	Naa30	Naa15	10090.ENSMUSP00000041450	10090.ENSMUSP00000029303	0	0	0	0	0.206	0.657	0.72	0.526	0.959	>node 1 information	Naa30	ENSMUSG00000036282	13.8953	22.1286	18.0119	0.457102	0.673	0.30763	-1.59252	Down	MGI:1922259				>node 2 information	Naa15	ENSMUSG00000063273	21.5612	31.4926	26.5269	0.37439	0.786	0.29427	-1.46061	Down	MGI:1922088	cell differentiation
>interaction	H3f3b	Asf1b	10090.ENSMUSP00000016703	10090.ENSMUSP00000005607	0	0	0	0	0.097	0.884	0	0.64	0.959	>node 1 information	H3f3b	ENSMUSG00000016559	60.638	81.5386	71.0883	0.294009	0.979	0.287835	-1.34468	Down	MGI:1101768	cell proliferation;cell differentiation	abnormal male fertility		>node 2 information	Asf1b	ENSMUSG00000005470	72.1413	101.487	86.8141	0.338029	0.99	0.334649	-1.40678	Down	MGI:1914179
>interaction	Aprt	Gmpr	10090.ENSMUSP00000006764	10090.ENSMUSP00000000260	0	0	0	0	0.104	0	0.944	0.238	0.959	>node 1 information	Aprt	ENSMUSG00000006589	65.9957	46.4001	56.1979	0.348689	0.956	0.333347	1.42232	Up	MGI:88061				>node 2 information	Gmpr	ENSMUSG00000000253	18.397	11.1919	14.7944	0.487014	0.622	0.302923	1.64378	Up	MGI:1913605
>interaction	Rbbp4	Ncor2	10090.ENSMUSP00000099658	10090.ENSMUSP00000083250	0	0	0	0	0	0.115	0.928	0.399	0.958	>node 1 information	Rbbp4	ENSMUSG00000057236	103.011	139.545	121.278	0.301242	0.997	0.300338	-1.35466	Down	MGI:1194912				>node 2 information	Ncor2	ENSMUSG00000029478	77.2072	56.488	66.8476	0.309947	0.974	0.301888	1.36679	Up	MGI:1337080	cell proliferation;cell differentiation
>interaction	Cenpk	Cdk1	10090.ENSMUSP00000022227	10090.ENSMUSP00000020099	0	0	0	0	0.582	0	0.9	0.094	0.958	>node 1 information	Cenpk	ENSMUSG00000021714	9.95195	16.0237	12.9878	0.467496	0.588	0.274887	-1.61011	Down	MGI:1926210				>node 2 information	Cdk1	ENSMUSG00000019942	57.6102	40.4389	49.0245	0.350259	0.936	0.327843	1.42462	Up	MGI:88351	cell proliferation;cell differentiation
>interaction	Pdlim7	Ret	10090.ENSMUSP00000047173	10090.ENSMUSP00000032201	0	0	0	0	0	0.111	0.95	0.121	0.958	>node 1 information	Pdlim7	ENSMUSG00000021493	25.7708	16.1852	20.978	0.456936	0.719	0.328537	1.59224	Up	MGI:1914649	cell differentiation			>node 2 information	Ret	ENSMUSG00000030110	36.526	25.857	31.1915	0.342048	0.832	0.284584	1.41262	Up	MGI:97902	cell differentiation	abnormal male fertility;abnormal spermatogenesis	Ret
>interaction	Chaf1b	Asf1b	10090.ENSMUSP00000023666	10090.ENSMUSP00000005607	0	0	0	0	0.526	0.78	0	0.631	0.958	>node 1 information	Chaf1b	ENSMUSG00000022945	31.8271	18.2411	25.0341	0.5427	0.77	0.417879	1.7448	Up	MGI:1314881				>node 2 information	Asf1b	ENSMUSG00000005470	72.1413	101.487	86.8141	0.338029	0.99	0.334649	-1.40678	Down	MGI:1914179
>interaction	Skp1a	Psmd14	10090.ENSMUSP00000038744	10090.ENSMUSP00000028278	0	0	0	0	0.257	0.387	0.9	0.191	0.958	>node 1 information	Skp1a	ENSMUSG00000036309	50.0088	80.2426	65.1257	0.464238	0.972	0.451239	-1.60457	Down	MGI:103575				>node 2 information	Psmd14	ENSMUSG00000026914	35.7514	55.7193	45.7353	0.436597	0.924	0.403415	-1.55852	Down	MGI:1913284
>interaction	Ptgis	Ptgds	10090.ENSMUSP00000018113	10090.ENSMUSP00000015234	0	0	0	0	0	0	0.9	0.602	0.958	>node 1 information	Ptgis	ENSMUSG00000017969	1.55739	0.429196	0.993293	1.13581	0.24	0.272595	3.62862	Up	MGI:1097156				>node 2 information	Ptgds	ENSMUSG00000015090	13.7776	5.47231	9.62495	0.862891	0.517	0.446115	2.51769	Up	MGI:99261	cell proliferation
>interaction	Smc4	Top2b	10090.ENSMUSP00000047872	10090.ENSMUSP00000017629	0	0	0	0	0.852	0.411	0	0.546	0.957	>node 1 information	Smc4	ENSMUSG00000034349	22.8962	42.0519	32.474	0.589877	0.842	0.496677	-1.83663	Down	MGI:1917349				>node 2 information	Top2b	ENSMUSG00000017485	11.6204	23.5306	17.5755	0.677659	0.667	0.451999	-2.02494	Down	MGI:98791	cell differentiation
>interaction	Ccny	Cdk14	10090.ENSMUSP00000050001	10090.ENSMUSP00000030763	0	0	0	0	0.052	0.653	0.72	0.589	0.957	>node 1 information	Ccny	ENSMUSG00000024286	36.4066	61.7216	49.0641	0.515958	0.937	0.483452	-1.69534	Down	MGI:1915224				>node 2 information	Cdk14	ENSMUSG00000028926	13.3817	8.02872	10.7052	0.500035	0.541	0.270519	1.66673	Up	MGI:894318
>interaction	Adss	Gmpr	10090.ENSMUSP00000016105	10090.ENSMUSP00000000260	0.318	0	0	0	0.225	0	0.9	0.271	0.956	>node 1 information	Adss	ENSMUSG00000015961	43.4678	60.8084	52.1381	0.33259	0.946	0.31463	-1.39893	Down	MGI:87948				>node 2 information	Gmpr	ENSMUSG00000000253	18.397	11.1919	14.7944	0.487014	0.622	0.302923	1.64378	Up	MGI:1913605
>interaction	Cul3	Psmd14	10090.ENSMUSP00000130738	10090.ENSMUSP00000028278	0	0	0	0	0.193	0.413	0.9	0.184	0.956	>node 1 information	Cul3	ENSMUSG00000004364	46.4411	68.4015	57.4213	0.382443	0.959	0.366763	-1.47287	Down	MGI:1347360	cell differentiation			>node 2 information	Psmd14	ENSMUSG00000026914	35.7514	55.7193	45.7353	0.436597	0.924	0.403415	-1.55852	Down	MGI:1913284
>interaction	Cops2	Psmd6	10090.ENSMUSP00000028635	10090.ENSMUSP00000022256	0	0	0	0	0.73	0.822	0	0.158	0.956	>node 1 information	Cops2	ENSMUSG00000027206	25.3319	35.7837	30.5578	0.342034	0.826	0.28252	-1.41259	Down	MGI:1330276	cell proliferation;cell differentiation			>node 2 information	Psmd6	ENSMUSG00000021737	40.3639	54.0615	47.2127	0.290125	0.93	0.269817	-1.33935	Down	MGI:1913663
>interaction	Rbbp4	Smarca1	10090.ENSMUSP00000099658	10090.ENSMUSP00000076769	0	0	0	0	0.27	0.682	0.769	0.276	0.956	>node 1 information	Rbbp4	ENSMUSG00000057236	103.011	139.545	121.278	0.301242	0.997	0.300338	-1.35466	Down	MGI:1194912				>node 2 information	Smarca1	ENSMUSG00000031099	13.2549	22.5757	17.9153	0.52027	0.672	0.349622	-1.7032	Down	MGI:1935127	cell proliferation;cell differentiation
>interaction	Esf1	Ddx56	10090.ENSMUSP00000036523	10090.ENSMUSP00000004507	0	0	0	0	0.956	0.047	0	0	0.956	>node 1 information	Esf1	ENSMUSG00000045624	21.234	33.9415	27.5877	0.460621	0.797	0.367115	-1.59845	Down	MGI:1913830				>node 2 information	Ddx56	ENSMUSG00000004393	48.5664	33.3119	40.9391	0.372614	0.901	0.335725	1.45793	Up	MGI:1277172	cell differentiation
>interaction	Top2a	Pias4	10090.ENSMUSP00000068896	10090.ENSMUSP00000005064	0	0	0	0	0.126	0.377	0.9	0.287	0.956	>node 1 information	Top2a	ENSMUSG00000020914	47.0462	64.8343	55.9402	0.317984	0.955	0.303675	-1.3781	Down	MGI:98790	cell differentiation			>node 2 information	Pias4	ENSMUSG00000004934	57.8228	41.5405	49.6816	0.327733	0.939	0.307741	1.39196	Up	MGI:2136940
>interaction	Pgm3	Nagk	10090.ENSMUSP00000070871	10090.ENSMUSP00000042026	0	0	0	0	0.11	0	0.942	0.212	0.955	>node 1 information	Pgm3	ENSMUSG00000056131	6.641	12.2347	9.43785	0.592688	0.513	0.304049	-1.8423	Down	MGI:97566		abnormal male fertility;abnormal spermatogenesis		>node 2 information	Nagk	ENSMUSG00000034744	12.9048	28.9712	20.938	0.767332	0.718	0.550944	-2.24499	Down	MGI:1860418
>interaction	Sall1	Hdac2	10090.ENSMUSP00000034090	10090.ENSMUSP00000019911	0	0	0	0	0	0.537	0.9	0.114	0.955	>node 1 information	Sall1	ENSMUSG00000031665	17.6123	9.3015	13.4569	0.617587	0.597	0.368699	1.89349	Up	MGI:1889585	cell proliferation;cell differentiation			>node 2 information	Hdac2	ENSMUSG00000019777	62.0497	84.1093	73.0795	0.301858	0.981	0.296122	-1.35552	Down	MGI:1097691	cell proliferation;cell differentiation
>interaction	Impdh1	Hprt	10090.ENSMUSP00000077289	10090.ENSMUSP00000026723	0.065	0	0	0	0.06	0	0.946	0.171	0.955	>node 1 information	Impdh1	ENSMUSG00000003500	31.429	22.2511	26.8401	0.341948	0.789	0.269797	1.41247	Up	MGI:96567	cell proliferation			>node 2 information	Hprt	ENSMUSG00000025630	29.9106	41.64	35.7753	0.327863	0.87	0.285241	-1.39215	Down	MGI:96217	cell proliferation;cell differentiation
>interaction	Stx18	Nbas	10090.ENSMUSP00000109761	10090.ENSMUSP00000036082	0	0	0	0	0.052	0.554	0.9	0.069	0.955	>node 1 information	Stx18	ENSMUSG00000029125	14.129	7.79985	10.9644	0.577244	0.547	0.315753	1.81145	Up	MGI:1918366				>node 2 information	Nbas	ENSMUSG00000020576	11.911	22.7241	17.3176	0.624401	0.664	0.414602	-1.90782	Down	MGI:1918419
>interaction	Asf1a	H3f3b	10090.ENSMUSP00000020004	10090.ENSMUSP00000016703	0	0	0	0	0.135	0.847	0	0.689	0.955	>node 1 information	Asf1a	ENSMUSG00000019857	17.906	39.0871	28.4965	0.743286	0.806	0.599089	-2.18291	Down	MGI:1913653	cell differentiation			>node 2 information	H3f3b	ENSMUSG00000016559	60.638	81.5386	71.0883	0.294009	0.979	0.287835	-1.34468	Down	MGI:1101768	cell proliferation;cell differentiation	abnormal male fertility
>interaction	Hprt	Gmpr	10090.ENSMUSP00000026723	10090.ENSMUSP00000000260	0	0	0	0	0.083	0	0.946	0.177	0.955	>node 1 information	Hprt	ENSMUSG00000025630	29.9106	41.64	35.7753	0.327863	0.87	0.285241	-1.39215	Down	MGI:96217	cell proliferation;cell differentiation			>node 2 information	Gmpr	ENSMUSG00000000253	18.397	11.1919	14.7944	0.487014	0.622	0.302923	1.64378	Up	MGI:1913605
>interaction	Smc6	Top2b	10090.ENSMUSP00000020931	10090.ENSMUSP00000017629	0	0	0	0	0.835	0.411	0	0.58	0.955	>node 1 information	Smc6	ENSMUSG00000020608	35.9419	50.198	43.0699	0.330999	0.912	0.301871	-1.39664	Down	MGI:1914491				>node 2 information	Top2b	ENSMUSG00000017485	11.6204	23.5306	17.5755	0.677659	0.667	0.451999	-2.02494	Down	MGI:98791	cell differentiation
>interaction	Sirt1	Hdac2	10090.ENSMUSP00000020257	10090.ENSMUSP00000019911	0	0	0	0	0.07	0.288	0.765	0.739	0.954	>node 1 information	Sirt1	ENSMUSG00000020063	19.5441	31.9323	25.7382	0.481316	0.777	0.373982	-1.63386	Down	MGI:2135607	cell proliferation;cell differentiation	abnormal male fertility;abnormal spermatogenesis		>node 2 information	Hdac2	ENSMUSG00000019777	62.0497	84.1093	73.0795	0.301858	0.981	0.296122	-1.35552	Down	MGI:1097691	cell proliferation;cell differentiation
>interaction	Rbbp4	Lin37	10090.ENSMUSP00000099658	10090.ENSMUSP00000048557	0	0	0	0	0.055	0.143	0.9	0.505	0.954	>node 1 information	Rbbp4	ENSMUSG00000057236	103.011	139.545	121.278	0.301242	0.997	0.300338	-1.35466	Down	MGI:1194912				>node 2 information	Lin37	ENSMUSG00000036845	10.1795	4.87895	7.52923	0.703997	0.468	0.32947	2.08641	Up	MGI:1922910
>interaction	Serpinh1	Col4a1	10090.ENSMUSP00000091706	10090.ENSMUSP00000033898	0	0	0	0	0.513	0	0.9	0.141	0.954	>node 1 information	Serpinh1	ENSMUSG00000070436	44.0546	21.6151	32.8349	0.683405	0.846	0.578161	2.03814	Up	MGI:88283	cell differentiation			>node 2 information	Col4a1	ENSMUSG00000031502	27.9753	18.7343	23.3548	0.395679	0.749	0.296363	1.49327	Up	MGI:88454
>interaction	Tubg1	Cdk1	10090.ENSMUSP00000048036	10090.ENSMUSP00000020099	0	0	0	0	0.201	0.128	0.9	0.404	0.952	>node 1 information	Tubg1	ENSMUSG00000035198	60.2912	42.6845	51.4879	0.341958	0.945	0.323151	1.41248	Up	MGI:101834				>node 2 information	Cdk1	ENSMUSG00000019942	57.6102	40.4389	49.0245	0.350259	0.936	0.327843	1.42462	Up	MGI:88351	cell proliferation;cell differentiation
>interaction	Smc5	Smc4	10090.ENSMUSP00000084837	10090.ENSMUSP00000047872	0	0	0	0	0.824	0	0	0.737	0.951	>node 1 information	Smc5	ENSMUSG00000024943	16.0463	24.2651	20.1557	0.407766	0.707	0.28829	-1.51219	Down	MGI:2385088				>node 2 information	Smc4	ENSMUSG00000034349	22.8962	42.0519	32.474	0.589877	0.842	0.496677	-1.83663	Down	MGI:1917349
>interaction	Smc5	Top2b	10090.ENSMUSP00000084837	10090.ENSMUSP00000017629	0	0	0	0	0.823	0.411	0	0.573	0.951	>node 1 information	Smc5	ENSMUSG00000024943	16.0463	24.2651	20.1557	0.407766	0.707	0.28829	-1.51219	Down	MGI:2385088				>node 2 information	Top2b	ENSMUSG00000017485	11.6204	23.5306	17.5755	0.677659	0.667	0.451999	-2.02494	Down	MGI:98791	cell differentiation
>interaction	Gfra1	Grb7	10090.ENSMUSP00000026076	10090.ENSMUSP00000019456	0	0	0	0	0	0	0.95	0.054	0.951	>node 1 information	Gfra1	ENSMUSG00000025089	12.6191	6.45463	9.53689	0.646387	0.515	0.332889	1.95505	Up	MGI:1100842	cell differentiation		Gfra1	>node 2 information	Grb7	ENSMUSG00000019312	43.0385	30.7184	36.8785	0.334073	0.877	0.292982	1.40107	Up	MGI:102683
>interaction	C1qa	Serping1	10090.ENSMUSP00000048836	10090.ENSMUSP00000023994	0	0	0	0	0.334	0	0.8	0.664	0.951	>node 1 information	C1qa	ENSMUSG00000036887	5.04134	1.85564	3.44849	0.923796	0.357	0.329795	2.71677	Up	MGI:88223				>node 2 information	Serping1	ENSMUSG00000023224	2.76028	0.941322	1.8508	0.982795	0.294	0.288942	2.93234	Up	MGI:894696
>interaction	Atr	Cdk1	10090.ENSMUSP00000034980	10090.ENSMUSP00000020099	0	0	0	0	0.067	0.801	0.384	0.629	0.951	>node 1 information	Atr	ENSMUSG00000032409	23.1463	41.1559	32.1511	0.560155	0.84	0.47053	-1.77808	Down	MGI:108028				>node 2 information	Cdk1	ENSMUSG00000019942	57.6102	40.4389	49.0245	0.350259	0.936	0.327843	1.42462	Up	MGI:88351	cell proliferation;cell differentiation
>interaction	Gadd45a	Cdk1	10090.ENSMUSP00000044034	10090.ENSMUSP00000020099	0	0	0	0	0	0.111	0.901	0.487	0.951	>node 1 information	Gadd45a	ENSMUSG00000036390	15.0341	22.3984	18.7162	0.393471	0.683	0.268741	-1.48984	Down	MGI:107799				>node 2 information	Cdk1	ENSMUSG00000019942	57.6102	40.4389	49.0245	0.350259	0.936	0.327843	1.42462	Up	MGI:88351	cell proliferation;cell differentiation
>interaction	Pdlim7	Gfra1	10090.ENSMUSP00000047173	10090.ENSMUSP00000026076	0	0	0	0	0	0	0.95	0	0.95	>node 1 information	Pdlim7	ENSMUSG00000021493	25.7708	16.1852	20.978	0.456936	0.719	0.328537	1.59224	Up	MGI:1914649	cell differentiation			>node 2 information	Gfra1	ENSMUSG00000025089	12.6191	6.45463	9.53689	0.646387	0.515	0.332889	1.95505	Up	MGI:1100842	cell differentiation		Gfra1
>interaction	Skp1a	Uba6	10090.ENSMUSP00000038744	10090.ENSMUSP00000035328	0	0	0	0	0.054	0.115	0.92	0.346	0.95	>node 1 information	Skp1a	ENSMUSG00000036309	50.0088	80.2426	65.1257	0.464238	0.972	0.451239	-1.60457	Down	MGI:103575				>node 2 information	Uba6	ENSMUSG00000035898	16.5199	28.092	22.3059	0.51879	0.736	0.381829	-1.70049	Down	MGI:1913894
>interaction	Hspb11	Ift74	10090.ENSMUSP00000048810	10090.ENSMUSP00000030311	0	0	0	0	0.101	0.062	0.9	0.48	0.95	>node 1 information	Hspb11	ENSMUSG00000063172	21.3837	11.1239	16.2538	0.631225	0.647	0.408402	1.92232	Up	MGI:1920188				>node 2 information	Ift74	ENSMUSG00000028576	22.3663	40.5022	31.4342	0.576947	0.834	0.481174	-1.81086	Down	MGI:1914944	cell proliferation;cell differentiation
>interaction	Ssb	Esf1	10090.ENSMUSP00000088365	10090.ENSMUSP00000036523	0	0	0	0	0.949	0.062	0	0	0.95	>node 1 information	Ssb	ENSMUSG00000068882	48.4089	70.3089	59.3589	0.368942	0.963	0.355291	-1.4524	Down	MGI:98423				>node 2 information	Esf1	ENSMUSG00000045624	21.234	33.9415	27.5877	0.460621	0.797	0.367115	-1.59845	Down	MGI:1913830
>interaction	Dusp1	Mapk9	10090.ENSMUSP00000025025	10090.ENSMUSP00000020634	0	0	0	0	0.051	0.297	0.867	0.503	0.95	>node 1 information	Dusp1	ENSMUSG00000024190	14.3345	7.7548	11.0447	0.595736	0.549	0.327059	1.84847	Up	MGI:105120				>node 2 information	Mapk9	ENSMUSG00000020366	27.7559	40.878	34.3169	0.38238	0.857	0.327699	-1.47277	Down	MGI:1346862	cell differentiation
>interaction	Nt5e	Gmpr	10090.ENSMUSP00000034992	10090.ENSMUSP00000000260	0.062	0	0	0	0.049	0	0.946	0.071	0.949	>node 1 information	Nt5e	ENSMUSG00000032420	24.2773	34.4179	29.3476	0.345534	0.814	0.281265	-1.4177	Down	MGI:99782				>node 2 information	Gmpr	ENSMUSG00000000253	18.397	11.1919	14.7944	0.487014	0.622	0.302923	1.64378	Up	MGI:1913605
>interaction	Kitl	Mmp9	10090.ENSMUSP00000100920	10090.ENSMUSP00000017881	0	0	0	0	0	0	0.9	0.512	0.949	>node 1 information	Kitl	ENSMUSG00000019966	29.851	43.7382	36.7946	0.377425	0.876	0.330624	-1.46522	Down	MGI:96974	cell proliferation;cell differentiation	abnormal male fertility;abnormal spermatogenesis		>node 2 information	Mmp9	ENSMUSG00000017737	8.08981	4.25239	6.1711	0.621837	0.433	0.269256	1.90241	Up	MGI:97011	cell proliferation
>interaction	Impdh1	Nt5e	10090.ENSMUSP00000077289	10090.ENSMUSP00000034992	0	0	0	0	0	0	0.946	0.08	0.948	>node 1 information	Impdh1	ENSMUSG00000003500	31.429	22.2511	26.8401	0.341948	0.789	0.269797	1.41247	Up	MGI:96567	cell proliferation			>node 2 information	Nt5e	ENSMUSG00000032420	24.2773	34.4179	29.3476	0.345534	0.814	0.281265	-1.4177	Down	MGI:99782
>interaction	Hist1h2af	Hdac2	10090.ENSMUSP00000072989	10090.ENSMUSP00000019911	0	0	0	0	0.049	0.178	0.9	0.417	0.948	>node 1 information	Hist1h2af	ENSMUSG00000061991	3.23177	0.591375	1.91157	1.38127	0.297	0.410237	5.46484	Up	MGI:2448309				>node 2 information	Hdac2	ENSMUSG00000019777	62.0497	84.1093	73.0795	0.301858	0.981	0.296122	-1.35552	Down	MGI:1097691	cell proliferation;cell differentiation
>interaction	Kitl	Grb7	10090.ENSMUSP00000100920	10090.ENSMUSP00000019456	0	0	0	0	0	0	0.94	0.176	0.948	>node 1 information	Kitl	ENSMUSG00000019966	29.851	43.7382	36.7946	0.377425	0.876	0.330624	-1.46522	Down	MGI:96974	cell proliferation;cell differentiation	abnormal male fertility;abnormal spermatogenesis		>node 2 information	Grb7	ENSMUSG00000019312	43.0385	30.7184	36.8785	0.334073	0.877	0.292982	1.40107	Up	MGI:102683
>interaction	Rab11a	Iqcb1	10090.ENSMUSP00000129163	10090.ENSMUSP00000023535	0	0	0	0	0.054	0.415	0.903	0.13	0.947	>node 1 information	Rab11a	ENSMUSG00000004771	33.5683	56.4305	44.9994	0.508056	0.92	0.467411	-1.68107	Down	MGI:1858202	cell differentiation			>node 2 information	Iqcb1	ENSMUSG00000022837	19.621	31.442	25.5315	0.462997	0.775	0.358822	-1.60247	Down	MGI:2443764	cell differentiation
>interaction	Smc5	Top2a	10090.ENSMUSP00000084837	10090.ENSMUSP00000068896	0	0	0	0	0.811	0.411	0	0.561	0.947	>node 1 information	Smc5	ENSMUSG00000024943	16.0463	24.2651	20.1557	0.407766	0.707	0.28829	-1.51219	Down	MGI:2385088				>node 2 information	Top2a	ENSMUSG00000020914	47.0462	64.8343	55.9402	0.317984	0.955	0.303675	-1.3781	Down	MGI:98790	cell differentiation
>interaction	Col4a1	Col6a1	10090.ENSMUSP00000033898	10090.ENSMUSP00000001147	0	0	0	0.617	0.405	0.082	0.9	0.349	0.947	>node 1 information	Col4a1	ENSMUSG00000031502	27.9753	18.7343	23.3548	0.395679	0.749	0.296363	1.49327	Up	MGI:88454				>node 2 information	Col6a1	ENSMUSG00000001119	9.71911	2.2577	5.98841	1.24598	0.428	0.533278	4.30487	Up	MGI:88459
>interaction	Tubg2	Cdk1	10090.ENSMUSP00000045901	10090.ENSMUSP00000020099	0	0	0	0	0.117	0.128	0.9	0.398	0.947	>node 1 information	Tubg2	ENSMUSG00000045007	8.58332	3.79528	6.1893	0.7736	0.433	0.334969	2.26158	Up	MGI:2144208				>node 2 information	Cdk1	ENSMUSG00000019942	57.6102	40.4389	49.0245	0.350259	0.936	0.327843	1.42462	Up	MGI:88351	cell proliferation;cell differentiation
>interaction	Top2a	Smc6	10090.ENSMUSP00000068896	10090.ENSMUSP00000020931	0	0	0	0	0.809	0.411	0	0.566	0.947	>node 1 information	Top2a	ENSMUSG00000020914	47.0462	64.8343	55.9402	0.317984	0.955	0.303675	-1.3781	Down	MGI:98790	cell differentiation			>node 2 information	Smc6	ENSMUSG00000020608	35.9419	50.198	43.0699	0.330999	0.912	0.301871	-1.39664	Down	MGI:1914491
>interaction	Copb1	Arf4	10090.ENSMUSP00000033012	10090.ENSMUSP00000022429	0	0	0	0	0.195	0.313	0.9	0.141	0.946	>node 1 information	Copb1	ENSMUSG00000030754	31.331	43.654	37.4925	0.328679	0.88	0.289238	-1.39332	Down	MGI:1917599				>node 2 information	Arf4	ENSMUSG00000021877	29.5103	47.5103	38.5103	0.467407	0.887	0.41459	-1.60996	Down	MGI:99433
>interaction	Nde1	Cdk1	10090.ENSMUSP00000023359	10090.ENSMUSP00000020099	0	0	0	0	0.141	0.111	0.923	0.173	0.945	>node 1 information	Nde1	ENSMUSG00000022678	31.929	21.2906	26.6098	0.399793	0.786	0.314237	1.49968	Up	MGI:1914453	cell proliferation;cell differentiation			>node 2 information	Cdk1	ENSMUSG00000019942	57.6102	40.4389	49.0245	0.350259	0.936	0.327843	1.42462	Up	MGI:88351	cell proliferation;cell differentiation
>interaction	H2-T23	Tap2	10090.ENSMUSP00000099739	10090.ENSMUSP00000025197	0	0	0	0	0.196	0.101	0.9	0.33	0.945	>node 1 information	H2-T23	ENSMUSG00000067212	0.189335	1.37218	0.780757	1.515	0.219	0.331784	-7.24737	Down	MGI:95957	cell proliferation			>node 2 information	Tap2	ENSMUSG00000024339	4.4707	9.98541	7.22805	0.76296	0.461	0.351724	-2.23352	Down	MGI:98484
>interaction	Col4a1	Col1a2	10090.ENSMUSP00000033898	10090.ENSMUSP00000031668	0	0	0	0.68	0.39	0	0.9	0.421	0.944	>node 1 information	Col4a1	ENSMUSG00000031502	27.9753	18.7343	23.3548	0.395679	0.749	0.296363	1.49327	Up	MGI:88454				>node 2 information	Col1a2	ENSMUSG00000029661	7.73864	3.26641	5.50253	0.81276	0.416	0.338108	2.36916	Up	MGI:88468
>interaction	Serpinh1	Col6a1	10090.ENSMUSP00000091706	10090.ENSMUSP00000001147	0	0	0	0	0.407	0	0.9	0.142	0.944	>node 1 information	Serpinh1	ENSMUSG00000070436	44.0546	21.6151	32.8349	0.683405	0.846	0.578161	2.03814	Up	MGI:88283	cell differentiation			>node 2 information	Col6a1	ENSMUSG00000001119	9.71911	2.2577	5.98841	1.24598	0.428	0.533278	4.30487	Up	MGI:88459
>interaction	Srsf5	Phf5a	10090.ENSMUSP00000105981	10090.ENSMUSP00000023117	0	0	0	0	0.046	0.415	0.9	0.129	0.944	>node 1 information	Srsf5	ENSMUSG00000021134	20.2171	30.6718	25.4444	0.410883	0.774	0.318024	-1.51712	Down	MGI:98287				>node 2 information	Phf5a	ENSMUSG00000061360	48.8673	67.1986	58.0329	0.315877	0.961	0.303558	-1.37512	Down	MGI:2156864
>interaction	Hist1h2af	Smarca5	10090.ENSMUSP00000072989	10090.ENSMUSP00000044361	0	0	0	0	0	0.267	0.9	0.306	0.944	>node 1 information	Hist1h2af	ENSMUSG00000061991	3.23177	0.591375	1.91157	1.38127	0.297	0.410237	5.46484	Up	MGI:2448309				>node 2 information	Smarca5	ENSMUSG00000031715	17.5076	26.9327	22.2202	0.424169	0.735	0.311764	-1.53834	Down	MGI:1935129
>interaction	Srsf6	Phf5a	10090.ENSMUSP00000119065	10090.ENSMUSP00000023117	0	0	0	0	0.103	0.415	0.9	0.071	0.944	>node 1 information	Srsf6	ENSMUSG00000016921	38.555	52.7262	45.6406	0.310495	0.923	0.286587	-1.36756	Down	MGI:1915246	cell proliferation;cell differentiation			>node 2 information	Phf5a	ENSMUSG00000061360	48.8673	67.1986	58.0329	0.315877	0.961	0.303558	-1.37512	Down	MGI:2156864
>interaction	Col4a1	Col6a2	10090.ENSMUSP00000033898	10090.ENSMUSP00000001181	0	0	0	0.615	0.244	0.047	0.919	0.36	0.944	>node 1 information	Col4a1	ENSMUSG00000031502	27.9753	18.7343	23.3548	0.395679	0.749	0.296363	1.49327	Up	MGI:88454				>node 2 information	Col6a2	ENSMUSG00000020241	9.87511	3.93759	6.90635	0.859719	0.453	0.389453	2.50791	Up	MGI:88460
>interaction	Smc1b	Top2b	10090.ENSMUSP00000023068	10090.ENSMUSP00000017629	0	0	0	0	0.804	0.411	0	0.546	0.943	>node 1 information	Smc1b	ENSMUSG00000022432	31.3255	53.9162	42.6208	0.530039	0.909	0.481805	-1.72116	Down	MGI:2154049		abnormal male fertility		>node 2 information	Top2b	ENSMUSG00000017485	11.6204	23.5306	17.5755	0.677659	0.667	0.451999	-2.02494	Down	MGI:98791	cell differentiation
>interaction	Sycp2	Tex11	10090.ENSMUSP00000079909	10090.ENSMUSP00000009814	0	0	0	0	0.055	0.535	0	0.881	0.943	>node 1 information	Sycp2	ENSMUSG00000060445	10.1192	23.1841	16.6517	0.784601	0.653	0.512344	-2.2911	Down	MGI:1933281		abnormal male fertility		>node 2 information	Tex11	ENSMUSG00000009670	26.6238	48.6657	37.6448	0.585524	0.881	0.515847	-1.8279	Down	MGI:1933237		abnormal male fertility;abnormal spermatogenesis
>interaction	Top2a	Smc1b	10090.ENSMUSP00000068896	10090.ENSMUSP00000023068	0	0	0	0	0.804	0.411	0	0.546	0.943	>node 1 information	Top2a	ENSMUSG00000020914	47.0462	64.8343	55.9402	0.317984	0.955	0.303675	-1.3781	Down	MGI:98790	cell differentiation			>node 2 information	Smc1b	ENSMUSG00000022432	31.3255	53.9162	42.6208	0.530039	0.909	0.481805	-1.72116	Down	MGI:2154049		abnormal male fertility
>interaction	Birc2	Tax1bp1	10090.ENSMUSP00000091422	10090.ENSMUSP00000079548	0	0	0	0	0.134	0	0.9	0.4	0.943	>node 1 information	Birc2	ENSMUSG00000057367	26.647	38.5157	32.5814	0.364279	0.844	0.307451	-1.4454	Down	MGI:1197009				>node 2 information	Tax1bp1	ENSMUSG00000004535	44.2656	60.0532	52.1594	0.30268	0.946	0.286335	-1.35666	Down	MGI:1289308
>interaction	Tubg1	Pafah1b1	10090.ENSMUSP00000048036	10090.ENSMUSP00000021091	0	0	0	0	0.053	0.099	0.9	0.406	0.942	>node 1 information	Tubg1	ENSMUSG00000035198	60.2912	42.6845	51.4879	0.341958	0.945	0.323151	1.41248	Up	MGI:101834				>node 2 information	Pafah1b1	ENSMUSG00000020745	37.7155	55.4333	46.5744	0.380419	0.928	0.353029	-1.46978	Down	MGI:109520	cell proliferation;cell differentiation	abnormal male fertility
>interaction	Mapk10	Dusp1	10090.ENSMUSP00000108468	10090.ENSMUSP00000025025	0	0	0	0	0.051	0.297	0.867	0.427	0.942	>node 1 information	Mapk10	ENSMUSG00000046709	14.6367	8.59425	11.6155	0.520207	0.561	0.291836	1.70308	Up	MGI:1346863	cell differentiation			>node 2 information	Dusp1	ENSMUSG00000024190	14.3345	7.7548	11.0447	0.595736	0.549	0.327059	1.84847	Up	MGI:105120
>interaction	Utp18	Exosc3	10090.ENSMUSP00000068103	10090.ENSMUSP00000030003	0	0	0	0	0.444	0	0.9	0	0.942	>node 1 information	Utp18	ENSMUSG00000054079	19.3802	41.494	30.4371	0.726541	0.824	0.59867	-2.14105	Down	MGI:1923402				>node 2 information	Exosc3	ENSMUSG00000028322	23.8198	38.9875	31.4036	0.482992	0.834	0.402815	-1.63677	Down	MGI:1913612
>interaction	Nhp2l1	Snrpd2	10090.ENSMUSP00000091840	10090.ENSMUSP00000037597	0	0	0	0	0.353	0.901	0	0.154	0.941	>node 1 information	Nhp2l1	ENSMUSG00000063480	33.7821	45.8238	39.803	0.302533	0.895	0.270767	-1.35645	Down	MGI:893586				>node 2 information	Snrpd2	ENSMUSG00000040824	48.1126	97.5585	72.8355	0.67887	0.981	0.665972	-2.02771	Down	MGI:98345
>interaction	Impdh1	Adss	10090.ENSMUSP00000077289	10090.ENSMUSP00000016105	0.08	0	0	0	0.091	0	0.9	0.377	0.941	>node 1 information	Impdh1	ENSMUSG00000003500	31.429	22.2511	26.8401	0.341948	0.789	0.269797	1.41247	Up	MGI:96567	cell proliferation			>node 2 information	Adss	ENSMUSG00000015961	43.4678	60.8084	52.1381	0.33259	0.946	0.31463	-1.39893	Down	MGI:87948
>interaction	Srsf6	Snrpd2	10090.ENSMUSP00000119065	10090.ENSMUSP00000037597	0	0	0	0	0.054	0.371	0.9	0.123	0.94	>node 1 information	Srsf6	ENSMUSG00000016921	38.555	52.7262	45.6406	0.310495	0.923	0.286587	-1.36756	Down	MGI:1915246	cell proliferation;cell differentiation			>node 2 information	Snrpd2	ENSMUSG00000040824	48.1126	97.5585	72.8355	0.67887	0.981	0.665972	-2.02771	Down	MGI:98345
>interaction	Chaf1b	Asf1a	10090.ENSMUSP00000023666	10090.ENSMUSP00000020004	0	0	0	0	0.399	0.78	0	0.584	0.94	>node 1 information	Chaf1b	ENSMUSG00000022945	31.8271	18.2411	25.0341	0.5427	0.77	0.417879	1.7448	Up	MGI:1314881				>node 2 information	Asf1a	ENSMUSG00000019857	17.906	39.0871	28.4965	0.743286	0.806	0.599089	-2.18291	Down	MGI:1913653	cell differentiation
>interaction	Srsf5	Snrpd2	10090.ENSMUSP00000105981	10090.ENSMUSP00000037597	0	0	0	0	0.054	0.371	0.9	0.122	0.94	>node 1 information	Srsf5	ENSMUSG00000021134	20.2171	30.6718	25.4444	0.410883	0.774	0.318024	-1.51712	Down	MGI:98287				>node 2 information	Snrpd2	ENSMUSG00000040824	48.1126	97.5585	72.8355	0.67887	0.981	0.665972	-2.02771	Down	MGI:98345
>interaction	Atr	Smc1b	10090.ENSMUSP00000034980	10090.ENSMUSP00000023068	0	0	0	0	0.137	0.167	0.9	0.271	0.94	>node 1 information	Atr	ENSMUSG00000032409	23.1463	41.1559	32.1511	0.560155	0.84	0.47053	-1.77808	Down	MGI:108028				>node 2 information	Smc1b	ENSMUSG00000022432	31.3255	53.9162	42.6208	0.530039	0.909	0.481805	-1.72116	Down	MGI:2154049		abnormal male fertility
>interaction	Tubg2	Pafah1b1	10090.ENSMUSP00000045901	10090.ENSMUSP00000021091	0	0	0	0	0.053	0.099	0.9	0.372	0.939	>node 1 information	Tubg2	ENSMUSG00000045007	8.58332	3.79528	6.1893	0.7736	0.433	0.334969	2.26158	Up	MGI:2144208				>node 2 information	Pafah1b1	ENSMUSG00000020745	37.7155	55.4333	46.5744	0.380419	0.928	0.353029	-1.46978	Down	MGI:109520	cell proliferation;cell differentiation	abnormal male fertility
>interaction	Anapc10	Ube2e1	10090.ENSMUSP00000048244	10090.ENSMUSP00000022296	0	0	0	0	0	0.394	0.9	0.088	0.939	>node 1 information	Anapc10	ENSMUSG00000036977	9.24782	16.1556	12.7017	0.543846	0.583	0.317062	-1.74696	Down	MGI:1916249				>node 2 information	Ube2e1	ENSMUSG00000021774	30.807	46.123	38.465	0.39818	0.887	0.353186	-1.49716	Down	MGI:107411
>interaction	Cog5	Copb1	10090.ENSMUSP00000044797	10090.ENSMUSP00000033012	0	0	0	0	0.233	0	0.9	0.269	0.939	>node 1 information	Cog5	ENSMUSG00000035933	15.5768	24.5444	20.0606	0.447026	0.705	0.315153	-1.5757	Down	MGI:2145130				>node 2 information	Copb1	ENSMUSG00000030754	31.331	43.654	37.4925	0.328679	0.88	0.289238	-1.39332	Down	MGI:1917599
>interaction	Psmd6	Cdk1	10090.ENSMUSP00000022256	10090.ENSMUSP00000020099	0	0	0	0	0.118	0.372	0.9	0	0.939	>node 1 information	Psmd6	ENSMUSG00000021737	40.3639	54.0615	47.2127	0.290125	0.93	0.269817	-1.33935	Down	MGI:1913663				>node 2 information	Cdk1	ENSMUSG00000019942	57.6102	40.4389	49.0245	0.350259	0.936	0.327843	1.42462	Up	MGI:88351	cell proliferation;cell differentiation
>interaction	Rragb	Rheb	10090.ENSMUSP00000039013	10090.ENSMUSP00000030787	0	0	0	0	0.113	0.047	0.9	0.359	0.938	>node 1 information	Rragb	ENSMUSG00000041658	11.2252	21.2916	16.2584	0.619151	0.647	0.400591	-1.89677	Down	MGI:3038613				>node 2 information	Rheb	ENSMUSG00000028945	24.9841	40.1522	32.5682	0.465734	0.843	0.392614	-1.60711	Down	MGI:97912	cell differentiation
>interaction	Hmox1	Blvra	10090.ENSMUSP00000005548	10090.ENSMUSP00000002064	0	0	0	0	0	0	0.9	0.414	0.938	>node 1 information	Hmox1	ENSMUSG00000005413	44.5088	31.5777	38.0433	0.339905	0.884	0.300476	1.4095	Up	MGI:96163	cell proliferation			>node 2 information	Blvra	ENSMUSG00000001999	5.19848	13.0141	9.1063	0.858267	0.504	0.432567	-2.50345	Down	MGI:88170
>interaction	Utp18	Pwp1	10090.ENSMUSP00000068103	10090.ENSMUSP00000001836	0	0	0	0	0.922	0	0	0.241	0.938	>node 1 information	Utp18	ENSMUSG00000054079	19.3802	41.494	30.4371	0.726541	0.824	0.59867	-2.14105	Down	MGI:1923402				>node 2 information	Pwp1	ENSMUSG00000001785	34.152	47.5857	40.8689	0.328703	0.901	0.296161	-1.39335	Down	MGI:1914735	cell differentiation
>interaction	Kitl	Yes1	10090.ENSMUSP00000100920	10090.ENSMUSP00000072154	0	0	0	0	0.147	0.062	0.92	0.13	0.937	>node 1 information	Kitl	ENSMUSG00000019966	29.851	43.7382	36.7946	0.377425	0.876	0.330624	-1.46522	Down	MGI:96974	cell proliferation;cell differentiation	abnormal male fertility;abnormal spermatogenesis		>node 2 information	Yes1	ENSMUSG00000014932	11.5126	19.1687	15.3407	0.499073	0.633	0.315913	-1.66502	Down	MGI:99147	cell proliferation;cell differentiation
>interaction	Cdk1	Cdt1	10090.ENSMUSP00000020099	10090.ENSMUSP00000006760	0	0	0	0	0.555	0.554	0.384	0.546	0.937	>node 1 information	Cdk1	ENSMUSG00000019942	57.6102	40.4389	49.0245	0.350259	0.936	0.327843	1.42462	Up	MGI:88351	cell proliferation;cell differentiation			>node 2 information	Cdt1	ENSMUSG00000006585	30.4764	21.5604	26.0184	0.342681	0.781	0.267634	1.41354	Up	MGI:1914427
>interaction	Mcm9	Orc5	10090.ENSMUSP00000074978	10090.ENSMUSP00000030872	0	0	0	0	0.268	0.741	0.39	0.526	0.937	>node 1 information	Mcm9	ENSMUSG00000058298	11.5128	4.25857	7.88568	0.919924	0.476	0.437884	2.70344	Up	MGI:1918817				>node 2 information	Orc5	ENSMUSG00000029012	32.0778	44.1858	38.1318	0.31753	0.885	0.281014	-1.37746	Down	MGI:1347044
>interaction	Rbbp4	Top2a	10090.ENSMUSP00000099658	10090.ENSMUSP00000068896	0	0	0	0	0.299	0	0.9	0.164	0.936	>node 1 information	Rbbp4	ENSMUSG00000057236	103.011	139.545	121.278	0.301242	0.997	0.300338	-1.35466	Down	MGI:1194912				>node 2 information	Top2a	ENSMUSG00000020914	47.0462	64.8343	55.9402	0.317984	0.955	0.303675	-1.3781	Down	MGI:98790	cell differentiation
>interaction	Ash1l	Hdac2	10090.ENSMUSP00000088451	10090.ENSMUSP00000019911	0.071	0	0	0	0.089	0.727	0.289	0.671	0.936	>node 1 information	Ash1l	ENSMUSG00000028053	20.181	29.1935	24.6872	0.365067	0.766	0.279641	-1.44658	Down	MGI:2183158		abnormal male fertility		>node 2 information	Hdac2	ENSMUSG00000019777	62.0497	84.1093	73.0795	0.301858	0.981	0.296122	-1.35552	Down	MGI:1097691	cell proliferation;cell differentiation
>interaction	Pik3c2a	Mtmr1	10090.ENSMUSP00000126092	10090.ENSMUSP00000015358	0	0	0	0	0.054	0.059	0.9	0.374	0.936	>node 1 information	Pik3c2a	ENSMUSG00000030660	12.3005	21.456	16.8783	0.542444	0.657	0.356385	-1.74432	Down	MGI:1203729				>node 2 information	Mtmr1	ENSMUSG00000015214	6.64978	11.8541	9.25194	0.562511	0.508	0.285756	-1.78263	Down	MGI:1858271
>interaction	Csnk1e	Cdk1	10090.ENSMUSP00000113341	10090.ENSMUSP00000020099	0	0	0	0.638	0.111	0.101	0.918	0.316	0.936	>node 1 information	Csnk1e	ENSMUSG00000022433	60.3353	41.6457	50.9905	0.366531	0.943	0.345639	1.44878	Up	MGI:1351660				>node 2 information	Cdk1	ENSMUSG00000019942	57.6102	40.4389	49.0245	0.350259	0.936	0.327843	1.42462	Up	MGI:88351	cell proliferation;cell differentiation
>interaction	Cyp11a1	Cyp17a1	10090.ENSMUSP00000034874	10090.ENSMUSP00000026012	0	0	0	0.633	0.07	0	0.9	0.943	0.936	>node 1 information	Cyp11a1	ENSMUSG00000032323	32.2124	13.8869	23.0496	0.795045	0.745	0.592308	2.31962	Up	MGI:88582		abnormal spermatogenesis		>node 2 information	Cyp17a1	ENSMUSG00000003555	21.2939	6.61454	13.9542	1.05197	0.607	0.638543	3.21926	Up	MGI:88586		abnormal male fertility
>interaction	Oxtr	Cck	10090.ENSMUSP00000051132	10090.ENSMUSP00000035120	0	0	0	0	0	0.062	0.9	0.382	0.936	>node 1 information	Oxtr	ENSMUSG00000049112	2.47201	0.865303	1.66866	0.962875	0.284	0.273456	2.85681	Up	MGI:109147				>node 2 information	Cck	ENSMUSG00000032532	0.378231	3.23965	1.80894	1.58182	0.291	0.46031	-8.56527	Down	MGI:88297	cell proliferation;cell differentiation
>interaction	Ddb2	Ercc1	10090.ENSMUSP00000028696	10090.ENSMUSP00000003645	0	0	0	0	0	0	0.9	0.387	0.936	>node 1 information	Ddb2	ENSMUSG00000002109	8.51632	14.176	11.3462	0.498819	0.556	0.277343	-1.66457	Down	MGI:1355314				>node 2 information	Ercc1	ENSMUSG00000003549	33.0386	22.7417	27.8901	0.369195	0.8	0.295356	1.45278	Up	MGI:95412	cell proliferation;cell differentiation	abnormal male fertility;abnormal spermatogenesis
>interaction	Gnai1	Pf4	10090.ENSMUSP00000074259	10090.ENSMUSP00000031320	0	0	0	0	0	0	0.935	0	0.935	>node 1 information	Gnai1	ENSMUSG00000057614	8.8623	19.5502	14.2063	0.752338	0.612	0.460431	-2.206	Down	MGI:95771				>node 2 information	Pf4	ENSMUSG00000029373	5.26837	1.96588	3.61713	0.913015	0.362	0.330511	2.6799	Up	MGI:1888711	cell proliferation;cell differentiation
>interaction	Taf13	Taf7l	10090.ENSMUSP00000121346	10090.ENSMUSP00000009740	0	0	0	0	0.054	0.771	0.54	0.433	0.935	>node 1 information	Taf13	ENSMUSG00000048100	13.9607	21.1654	17.5631	0.410219	0.667	0.273616	-1.51607	Down	MGI:1913500				>node 2 information	Taf7l	ENSMUSG00000009596	68.47	97.0847	82.7773	0.345683	0.988	0.341535	-1.41792	Down	MGI:1921719	cell differentiation	abnormal male fertility
>interaction	Top2a	Cdk1	10090.ENSMUSP00000068896	10090.ENSMUSP00000020099	0	0	0	0	0.861	0.111	0	0.518	0.935	>node 1 information	Top2a	ENSMUSG00000020914	47.0462	64.8343	55.9402	0.317984	0.955	0.303675	-1.3781	Down	MGI:98790	cell differentiation			>node 2 information	Cdk1	ENSMUSG00000019942	57.6102	40.4389	49.0245	0.350259	0.936	0.327843	1.42462	Up	MGI:88351	cell proliferation;cell differentiation
>interaction	Ube2t	Ercc1	10090.ENSMUSP00000027687	10090.ENSMUSP00000003645	0	0	0	0	0	0.046	0.921	0.206	0.935	>node 1 information	Ube2t	ENSMUSG00000026429	23.2075	33.5272	28.3673	0.363788	0.804	0.292486	-1.44467	Down	MGI:1914446				>node 2 information	Ercc1	ENSMUSG00000003549	33.0386	22.7417	27.8901	0.369195	0.8	0.295356	1.45278	Up	MGI:95412	cell proliferation;cell differentiation	abnormal male fertility;abnormal spermatogenesis
>interaction	Picalm	Vamp3	10090.ENSMUSP00000051092	10090.ENSMUSP00000030797	0	0	0	0	0.079	0.044	0.9	0.356	0.935	>node 1 information	Picalm	ENSMUSG00000039361	33.0181	46.863	39.9406	0.346638	0.895	0.310241	-1.41931	Down	MGI:2385902	cell proliferation;cell differentiation			>node 2 information	Vamp3	ENSMUSG00000028955	26.1553	43.0929	34.6241	0.489185	0.86	0.420699	-1.64758	Down	MGI:1321389	cell differentiation
>interaction	Hdac2	Suz12	10090.ENSMUSP00000019911	10090.ENSMUSP00000017692	0	0	0	0	0.111	0.392	0.836	0.349	0.934	>node 1 information	Hdac2	ENSMUSG00000019777	62.0497	84.1093	73.0795	0.301858	0.981	0.296122	-1.35552	Down	MGI:1097691	cell proliferation;cell differentiation			>node 2 information	Suz12	ENSMUSG00000017548	25.5889	40.6406	33.1148	0.454532	0.848	0.385443	-1.58821	Down	MGI:1261758	cell proliferation;cell differentiation
>interaction	Mapk9	Ralb	10090.ENSMUSP00000020634	10090.ENSMUSP00000004565	0	0	0	0	0.079	0.303	0.901	0.066	0.933	>node 1 information	Mapk9	ENSMUSG00000020366	27.7559	40.878	34.3169	0.38238	0.857	0.327699	-1.47277	Down	MGI:1346862	cell differentiation			>node 2 information	Ralb	ENSMUSG00000004451	28.0115	38.5071	33.2593	0.315569	0.85	0.268234	-1.37469	Down	MGI:1927244
>interaction	Mapk10	Ralb	10090.ENSMUSP00000108468	10090.ENSMUSP00000004565	0	0	0	0	0.079	0.303	0.901	0.066	0.933	>node 1 information	Mapk10	ENSMUSG00000046709	14.6367	8.59425	11.6155	0.520207	0.561	0.291836	1.70308	Up	MGI:1346863	cell differentiation			>node 2 information	Ralb	ENSMUSG00000004451	28.0115	38.5071	33.2593	0.315569	0.85	0.268234	-1.37469	Down	MGI:1927244
>interaction	Cyld	Birc2	10090.ENSMUSP00000096119	10090.ENSMUSP00000091422	0	0	0	0	0.123	0	0.9	0.298	0.933	>node 1 information	Cyld	ENSMUSG00000036712	7.1934	12.9117	10.0526	0.568841	0.528	0.300348	-1.79494	Down	MGI:1921506	cell differentiation			>node 2 information	Birc2	ENSMUSG00000057367	26.647	38.5157	32.5814	0.364279	0.844	0.307451	-1.4454	Down	MGI:1197009
>interaction	Serpinh1	Col6a2	10090.ENSMUSP00000091706	10090.ENSMUSP00000001181	0	0	0	0	0.292	0	0.9	0.129	0.933	>node 1 information	Serpinh1	ENSMUSG00000070436	44.0546	21.6151	32.8349	0.683405	0.846	0.578161	2.03814	Up	MGI:88283	cell differentiation			>node 2 information	Col6a2	ENSMUSG00000020241	9.87511	3.93759	6.90635	0.859719	0.453	0.389453	2.50791	Up	MGI:88460
>interaction	Gsta4	Mgst1	10090.ENSMUSP00000034903	10090.ENSMUSP00000008684	0	0	0	0	0	0	0.9	0.349	0.932	>node 1 information	Gsta4	ENSMUSG00000032348	74.9758	99.7241	87.35	0.283324	0.99	0.28049	-1.33008	Down	MGI:1309515				>node 2 information	Mgst1	ENSMUSG00000008540	35.8576	54.8446	45.3511	0.418667	0.921	0.385592	-1.52951	Down	MGI:1913850
>interaction	Skp1a	Psmd6	10090.ENSMUSP00000038744	10090.ENSMUSP00000022256	0	0	0	0	0.34	0	0.9	0.059	0.932	>node 1 information	Skp1a	ENSMUSG00000036309	50.0088	80.2426	65.1257	0.464238	0.972	0.451239	-1.60457	Down	MGI:103575				>node 2 information	Psmd6	ENSMUSG00000021737	40.3639	54.0615	47.2127	0.290125	0.93	0.269817	-1.33935	Down	MGI:1913663
>interaction	Arcn1	Arf4	10090.ENSMUSP00000034607	10090.ENSMUSP00000022429	0	0	0	0	0.168	0.169	0.9	0.136	0.932	>node 1 information	Arcn1	ENSMUSG00000032096	36.1421	50.5648	43.3535	0.332677	0.912	0.303402	-1.39906	Down	MGI:2387591				>node 2 information	Arf4	ENSMUSG00000021877	29.5103	47.5103	38.5103	0.467407	0.887	0.41459	-1.60996	Down	MGI:99433
>interaction	Rab11a	Cdk1	10090.ENSMUSP00000129163	10090.ENSMUSP00000020099	0	0	0	0	0.085	0.112	0.909	0.188	0.932	>node 1 information	Rab11a	ENSMUSG00000004771	33.5683	56.4305	44.9994	0.508056	0.92	0.467411	-1.68107	Down	MGI:1858202	cell differentiation			>node 2 information	Cdk1	ENSMUSG00000019942	57.6102	40.4389	49.0245	0.350259	0.936	0.327843	1.42462	Up	MGI:88351	cell proliferation;cell differentiation
>interaction	Pafah1b1	Taok1	10090.ENSMUSP00000021091	10090.ENSMUSP00000017435	0	0	0	0	0.338	0	0.9	0.05	0.931	>node 1 information	Pafah1b1	ENSMUSG00000020745	37.7155	55.4333	46.5744	0.380419	0.928	0.353029	-1.46978	Down	MGI:109520	cell proliferation;cell differentiation	abnormal male fertility		>node 2 information	Taok1	ENSMUSG00000017291	17.0409	26.5511	21.796	0.436328	0.729	0.318083	-1.55808	Down	MGI:1914490
>interaction	Cacng5	Cacnb1	10090.ENSMUSP00000047888	10090.ENSMUSP00000017552	0	0	0	0	0.079	0	0.9	0.319	0.931	>node 1 information	Cacng5	ENSMUSG00000040373	2.08558	9.50261	5.7941	1.2801	0.423	0.541483	-4.55634	Down	MGI:2157946				>node 2 information	Cacnb1	ENSMUSG00000020882	1.73029	9.5573	5.64379	1.38683	0.42	0.582471	-5.52352	Down	MGI:102522
>interaction	Gal3st1	Ugt8a	10090.ENSMUSP00000058348	10090.ENSMUSP00000050852	0	0	0	0	0.054	0	0.9	0.332	0.931	>node 1 information	Gal3st1	ENSMUSG00000049721	1.08325	3.05125	2.06725	0.951988	0.305	0.290356	-2.81675	Down	MGI:1858277		abnormal male fertility		>node 2 information	Ugt8a	ENSMUSG00000032854	4.66549	13.1942	8.92985	0.955079	0.5	0.47754	-2.82804	Down	MGI:109522	cell differentiation
>interaction	Psmd14	Ube2e1	10090.ENSMUSP00000028278	10090.ENSMUSP00000022296	0	0	0	0	0.194	0.191	0.9	0.071	0.931	>node 1 information	Psmd14	ENSMUSG00000026914	35.7514	55.7193	45.7353	0.436597	0.924	0.403415	-1.55852	Down	MGI:1913284				>node 2 information	Ube2e1	ENSMUSG00000021774	30.807	46.123	38.465	0.39818	0.887	0.353186	-1.49716	Down	MGI:107411
>interaction	Hist1h2aa	H3f3b	10090.ENSMUSP00000072227	10090.ENSMUSP00000016703	0	0	0	0	0.671	0.511	0	0.605	0.931	>node 1 information	Hist1h2aa	ENSMUSG00000060081	0.22077	1.48228	0.851525	1.48147	0.226	0.334813	-6.71414	Down	MGI:2448285				>node 2 information	H3f3b	ENSMUSG00000016559	60.638	81.5386	71.0883	0.294009	0.979	0.287835	-1.34468	Down	MGI:1101768	cell proliferation;cell differentiation	abnormal male fertility
>interaction	Utp18	Exosc9	10090.ENSMUSP00000068103	10090.ENSMUSP00000029269	0	0	0	0	0.343	0	0.9	0	0.931	>node 1 information	Utp18	ENSMUSG00000054079	19.3802	41.494	30.4371	0.726541	0.824	0.59867	-2.14105	Down	MGI:1923402				>node 2 information	Exosc9	ENSMUSG00000027714	15.2009	22.659	18.93	0.393984	0.687	0.270667	-1.49064	Down	MGI:1355319
>interaction	Nop58	C1d	10090.ENSMUSP00000027174	10090.ENSMUSP00000000594	0	0	0	0	0.1	0.263	0.9	0.082	0.93	>node 1 information	Nop58	ENSMUSG00000026020	38.1776	55.3223	46.7499	0.366732	0.929	0.340694	-1.44908	Down	MGI:1933184				>node 2 information	C1d	ENSMUSG00000000581	6.17138	11.2441	8.70774	0.582553	0.494	0.287781	-1.82197	Down	MGI:1927354
>interaction	Jun	Mmp9	10090.ENSMUSP00000054270	10090.ENSMUSP00000017881	0	0	0	0	0.051	0.107	0.528	0.846	0.93	>node 1 information	Jun	ENSMUSG00000052684	51.1912	37.6828	44.437	0.30399	0.917	0.278759	1.35848	Up	MGI:96646	cell proliferation;cell differentiation			>node 2 information	Mmp9	ENSMUSG00000017737	8.08981	4.25239	6.1711	0.621837	0.433	0.269256	1.90241	Up	MGI:97011	cell proliferation
>interaction	Rbbp4	Hist1h2af	10090.ENSMUSP00000099658	10090.ENSMUSP00000072989	0	0	0	0	0.056	0.115	0.9	0.267	0.93	>node 1 information	Rbbp4	ENSMUSG00000057236	103.011	139.545	121.278	0.301242	0.997	0.300338	-1.35466	Down	MGI:1194912				>node 2 information	Hist1h2af	ENSMUSG00000061991	3.23177	0.591375	1.91157	1.38127	0.297	0.410237	5.46484	Up	MGI:2448309
>interaction	Sipa1	Rap1b	10090.ENSMUSP00000073618	10090.ENSMUSP00000066238	0	0	0	0	0	0.308	0.901	0.064	0.93	>node 1 information	Sipa1	ENSMUSG00000056917	48.8114	32.5859	40.6987	0.398674	0.9	0.358807	1.49793	Up	MGI:107576				>node 2 information	Rap1b	ENSMUSG00000052681	55.3166	73.0087	64.1626	0.275738	0.97	0.267466	-1.31983	Down	MGI:894315	cell proliferation;cell differentiation
>interaction	Smc4	Smc1b	10090.ENSMUSP00000047872	10090.ENSMUSP00000023068	0	0	0	0.644	0.52	0.827	0	0.579	0.93	>node 1 information	Smc4	ENSMUSG00000034349	22.8962	42.0519	32.474	0.589877	0.842	0.496677	-1.83663	Down	MGI:1917349				>node 2 information	Smc1b	ENSMUSG00000022432	31.3255	53.9162	42.6208	0.530039	0.909	0.481805	-1.72116	Down	MGI:2154049		abnormal male fertility
>interaction	Fbxl5	Skp1a	10090.ENSMUSP00000045792	10090.ENSMUSP00000038744	0	0	0	0	0.052	0.111	0.9	0.277	0.93	>node 1 information	Fbxl5	ENSMUSG00000039753	34.0093	48.3285	41.1689	0.347816	0.902	0.31373	-1.42104	Down	MGI:2152883				>node 2 information	Skp1a	ENSMUSG00000036309	50.0088	80.2426	65.1257	0.464238	0.972	0.451239	-1.60457	Down	MGI:103575
>interaction	Rab11a	Pafah1b1	10090.ENSMUSP00000129163	10090.ENSMUSP00000021091	0	0	0	0	0.117	0.042	0.91	0.189	0.93	>node 1 information	Rab11a	ENSMUSG00000004771	33.5683	56.4305	44.9994	0.508056	0.92	0.467411	-1.68107	Down	MGI:1858202	cell differentiation			>node 2 information	Pafah1b1	ENSMUSG00000020745	37.7155	55.4333	46.5744	0.380419	0.928	0.353029	-1.46978	Down	MGI:109520	cell proliferation;cell differentiation	abnormal male fertility
>interaction	Ptges3	Hsp90b1	10090.ENSMUSP00000050292	10090.ENSMUSP00000020238	0	0	0	0	0.556	0.502	0.373	0.559	0.93	>node 1 information	Ptges3	ENSMUSG00000071072	30.8772	44.3899	37.6335	0.35906	0.881	0.316332	-1.43763	Down	MGI:1929282	cell proliferation			>node 2 information	Hsp90b1	ENSMUSG00000020048	91.776	128.922	110.349	0.336623	0.996	0.335276	-1.40475	Down	MGI:98817
>interaction	Sct	Ramp1	10090.ENSMUSP00000128729	10090.ENSMUSP00000095253	0	0	0	0	0	0	0.9	0.324	0.929	>node 1 information	Sct	ENSMUSG00000038580	3.12958	0.172299	1.65094	1.79127	0.282	0.505139	18.1637	Up	MGI:99466				>node 2 information	Ramp1	ENSMUSG00000034353	6.54412	2.92343	4.73377	0.764863	0.396	0.302886	2.23851	Up	MGI:1858418
>interaction	Exoc5	Rab14	10090.ENSMUSP00000125434	10090.ENSMUSP00000028238	0	0	0	0	0.083	0.111	0.916	0.084	0.929	>node 1 information	Exoc5	ENSMUSG00000061244	7.66296	17.1815	12.4222	0.766251	0.577	0.442127	-2.24215	Down	MGI:2145645				>node 2 information	Rab14	ENSMUSG00000026878	63.9477	93.8565	78.9021	0.379062	0.986	0.373755	-1.46771	Down	MGI:1915615
>interaction	Mpp6	Lin7c	10090.ENSMUSP00000038772	10090.ENSMUSP00000028583	0	0	0	0	0.054	0.785	0	0.68	0.929	>node 1 information	Mpp6	ENSMUSG00000038388	22.641	32.8951	27.768	0.369277	0.799	0.295052	-1.4529	Down	MGI:1927340				>node 2 information	Lin7c	ENSMUSG00000027162	14.8492	22.5479	18.6986	0.411727	0.683	0.28121	-1.51846	Down	MGI:1330839
>interaction	Ube2c	Ube2e1	10090.ENSMUSP00000085581	10090.ENSMUSP00000022296	0	0	0	0.833	0.094	0.239	0.9	0.376	0.929	>node 1 information	Ube2c	ENSMUSG00000001403	47.8028	33.7011	40.752	0.346037	0.9	0.311434	1.41843	Up	MGI:1915862				>node 2 information	Ube2e1	ENSMUSG00000021774	30.807	46.123	38.465	0.39818	0.887	0.353186	-1.49716	Down	MGI:107411
>interaction	Cul3	Cops5	10090.ENSMUSP00000130738	10090.ENSMUSP00000027050	0	0	0	0	0.133	0.814	0	0.59	0.928	>node 1 information	Cul3	ENSMUSG00000004364	46.4411	68.4015	57.4213	0.382443	0.959	0.366763	-1.47287	Down	MGI:1347360	cell differentiation			>node 2 information	Cops5	ENSMUSG00000025917	26.1005	36.3417	31.2211	0.328022	0.832	0.272914	-1.39238	Down	MGI:1349415
>interaction	Ywhaq	Rab14	10090.ENSMUSP00000100067	10090.ENSMUSP00000028238	0	0	0	0	0.052	0.19	0.909	0.091	0.928	>node 1 information	Ywhaq	ENSMUSG00000076432	27.626	38.7961	33.2111	0.336334	0.849	0.285547	-1.40433	Down	MGI:891963				>node 2 information	Rab14	ENSMUSG00000026878	63.9477	93.8565	78.9021	0.379062	0.986	0.373755	-1.46771	Down	MGI:1915615
>interaction	Arih1	Ube2e1	10090.ENSMUSP00000126531	10090.ENSMUSP00000022296	0	0	0	0	0.053	0.182	0.9	0.178	0.927	>node 1 information	Arih1	ENSMUSG00000025234	34.6992	50.549	42.6241	0.371851	0.909	0.338012	-1.45678	Down	MGI:1344363				>node 2 information	Ube2e1	ENSMUSG00000021774	30.807	46.123	38.465	0.39818	0.887	0.353186	-1.49716	Down	MGI:107411
>interaction	Mapk9	Dusp6	10090.ENSMUSP00000020634	10090.ENSMUSP00000020118	0	0	0	0	0.051	0.275	0.867	0.285	0.926	>node 1 information	Mapk9	ENSMUSG00000020366	27.7559	40.878	34.3169	0.38238	0.857	0.327699	-1.47277	Down	MGI:1346862	cell differentiation			>node 2 information	Dusp6	ENSMUSG00000019960	23.0052	14.7756	18.8904	0.43565	0.687	0.299291	1.55697	Up	MGI:1914853	cell differentiation
>interaction	Col13a1	Col6a2	10090.ENSMUSP00000101094	10090.ENSMUSP00000001181	0	0	0	0.627	0	0.047	0.919	0.263	0.926	>node 1 information	Col13a1	ENSMUSG00000058806	4.2817	1.52327	2.90248	0.950368	0.338	0.321225	2.81086	Up	MGI:1277201	cell differentiation			>node 2 information	Col6a2	ENSMUSG00000020241	9.87511	3.93759	6.90635	0.859719	0.453	0.389453	2.50791	Up	MGI:88460
>interaction	Srsf6	Srsf5	10090.ENSMUSP00000119065	10090.ENSMUSP00000105981	0	0	0	0.932	0.263	0	0.9	0.673	0.926	>node 1 information	Srsf6	ENSMUSG00000016921	38.555	52.7262	45.6406	0.310495	0.923	0.286587	-1.36756	Down	MGI:1915246	cell proliferation;cell differentiation			>node 2 information	Srsf5	ENSMUSG00000021134	20.2171	30.6718	25.4444	0.410883	0.774	0.318024	-1.51712	Down	MGI:98287
>interaction	Mapk10	Dusp6	10090.ENSMUSP00000108468	10090.ENSMUSP00000020118	0	0	0	0	0.051	0.275	0.867	0.292	0.926	>node 1 information	Mapk10	ENSMUSG00000046709	14.6367	8.59425	11.6155	0.520207	0.561	0.291836	1.70308	Up	MGI:1346863	cell differentiation			>node 2 information	Dusp6	ENSMUSG00000019960	23.0052	14.7756	18.8904	0.43565	0.687	0.299291	1.55697	Up	MGI:1914853	cell differentiation
>interaction	Srsf3	Nudt21	10090.ENSMUSP00000117045	10090.ENSMUSP00000034204	0	0	0	0	0.19	0	0.9	0.163	0.926	>node 1 information	Srsf3	ENSMUSG00000071172	29.2949	42.2882	35.7916	0.363027	0.871	0.316197	-1.44353	Down	MGI:98285				>node 2 information	Nudt21	ENSMUSG00000031754	3.47487	8.94399	6.20943	0.880776	0.434	0.382257	-2.57391	Down	MGI:1915469
>interaction	Eif5	Eif3m	10090.ENSMUSP00000061616	10090.ENSMUSP00000028592	0	0	0	0	0.14	0	0.9	0.2	0.925	>node 1 information	Eif5	ENSMUSG00000021282	38.5019	56.851	47.6765	0.384867	0.932	0.358696	-1.47658	Down	MGI:95309				>node 2 information	Eif3m	ENSMUSG00000027170	4.91709	9.44787	7.18248	0.63081	0.46	0.290173	-1.92144	Down	MGI:1351744
>interaction	Mrps14	Mrpl14	10090.ENSMUSP00000120075	10090.ENSMUSP00000024734	0	0	0	0	0.172	0.167	0.9	0.045	0.925	>node 1 information	Mrps14	ENSMUSG00000058267	9.76211	16.5502	13.1562	0.515963	0.591	0.304934	-1.69535	Down	MGI:1928141				>node 2 information	Mrpl14	ENSMUSG00000023939	65.4754	43.0308	54.2531	0.413702	0.952	0.393844	1.52159	Up	MGI:1333864
>interaction	Adam10	Epha2	10090.ENSMUSP00000063839	10090.ENSMUSP00000006614	0	0	0	0	0.056	0.097	0.9	0.23	0.925	>node 1 information	Adam10	ENSMUSG00000054693	36.3284	53.6473	44.9879	0.384968	0.92	0.354171	-1.47673	Down	MGI:109548	cell proliferation			>node 2 information	Epha2	ENSMUSG00000006445	22.9391	11.3933	17.1662	0.672589	0.661	0.444581	2.01339	Up	MGI:95278	cell proliferation;cell differentiation
>interaction	Tfrc	M6pr	10090.ENSMUSP00000023486	10090.ENSMUSP00000007602	0	0	0	0	0	0	0.9	0.286	0.925	>node 1 information	Tfrc	ENSMUSG00000022797	25.1625	45.0408	35.1016	0.566307	0.865	0.489855	-1.79	Down	MGI:98822	cell proliferation;cell differentiation			>node 2 information	M6pr	ENSMUSG00000007458	16.8481	34.6051	25.7266	0.690219	0.777	0.536301	-2.05395	Down	MGI:96904
>interaction	Pdia6	Ero1l	10090.ENSMUSP00000052912	10090.ENSMUSP00000022378	0	0	0	0	0.055	0.117	0.8	0.607	0.925	>node 1 information	Pdia6	ENSMUSG00000020571	57.0409	77.7226	67.3817	0.306933	0.975	0.29926	-1.36258	Down	MGI:1919103				>node 2 information	Ero1l	ENSMUSG00000021831	18.7438	27.6887	23.2162	0.385286	0.747	0.287809	-1.47722	Down	MGI:1354385	cell differentiation
>interaction	Snrpd2	Nudt21	10090.ENSMUSP00000037597	10090.ENSMUSP00000034204	0	0	0	0	0.209	0	0.9	0.132	0.925	>node 1 information	Snrpd2	ENSMUSG00000040824	48.1126	97.5585	72.8355	0.67887	0.981	0.665972	-2.02771	Down	MGI:98345				>node 2 information	Nudt21	ENSMUSG00000031754	3.47487	8.94399	6.20943	0.880776	0.434	0.382257	-2.57391	Down	MGI:1915469
>interaction	Ephx1	Gsta4	10090.ENSMUSP00000047551	10090.ENSMUSP00000034903	0	0	0	0	0.093	0	0.9	0.239	0.925	>node 1 information	Ephx1	ENSMUSG00000038776	12.6996	4.17423	8.43692	1.01048	0.488	0.493116	3.04238	Up	MGI:95405				>node 2 information	Gsta4	ENSMUSG00000032348	74.9758	99.7241	87.35	0.283324	0.99	0.28049	-1.33008	Down	MGI:1309515
>interaction	Psmd14	Cdk1	10090.ENSMUSP00000028278	10090.ENSMUSP00000020099	0	0	0	0	0.119	0.168	0.9	0.104	0.925	>node 1 information	Psmd14	ENSMUSG00000026914	35.7514	55.7193	45.7353	0.436597	0.924	0.403415	-1.55852	Down	MGI:1913284				>node 2 information	Cdk1	ENSMUSG00000019942	57.6102	40.4389	49.0245	0.350259	0.936	0.327843	1.42462	Up	MGI:88351	cell proliferation;cell differentiation
>interaction	Cyp26a1	Adh1	10090.ENSMUSP00000025946	10090.ENSMUSP00000004232	0.054	0	0	0	0	0	0.9	0.268	0.924	>node 1 information	Cyp26a1	ENSMUSG00000024987	3.11557	7.43845	5.27701	0.819191	0.41	0.335868	-2.38751	Down	MGI:1096359	cell differentiation			>node 2 information	Adh1	ENSMUSG00000074207	28.7479	10.0193	19.3836	0.966209	0.695	0.671515	2.86925	Up	MGI:87921
>interaction	Exosc9	Nop58	10090.ENSMUSP00000029269	10090.ENSMUSP00000027174	0	0	0	0	0.268	0.048	0.9	0.048	0.924	>node 1 information	Exosc9	ENSMUSG00000027714	15.2009	22.659	18.93	0.393984	0.687	0.270667	-1.49064	Down	MGI:1355319				>node 2 information	Nop58	ENSMUSG00000026020	38.1776	55.3223	46.7499	0.366732	0.929	0.340694	-1.44908	Down	MGI:1933184
>interaction	Rab11a	Tubg1	10090.ENSMUSP00000129163	10090.ENSMUSP00000048036	0	0	0	0	0.068	0.17	0.9	0.135	0.924	>node 1 information	Rab11a	ENSMUSG00000004771	33.5683	56.4305	44.9994	0.508056	0.92	0.467411	-1.68107	Down	MGI:1858202	cell differentiation			>node 2 information	Tubg1	ENSMUSG00000035198	60.2912	42.6845	51.4879	0.341958	0.945	0.323151	1.41248	Up	MGI:101834
>interaction	Ppp1cc	Xpo1	10090.ENSMUSP00000099587	10090.ENSMUSP00000020538	0	0	0	0	0.213	0.057	0.9	0.103	0.924	>node 1 information	Ppp1cc	ENSMUSG00000004455	31.299	43.4603	37.3796	0.325345	0.88	0.286304	-1.38855	Down	MGI:104872	cell differentiation	abnormal male fertility		>node 2 information	Xpo1	ENSMUSG00000020290	43.3663	69.5431	56.4547	0.463678	0.957	0.44374	-1.60362	Down	MGI:2144013
>interaction	Rbbp4	Bmi1	10090.ENSMUSP00000099658	10090.ENSMUSP00000028071	0	0	0	0	0.054	0	0.9	0.26	0.923	>node 1 information	Rbbp4	ENSMUSG00000057236	103.011	139.545	121.278	0.301242	0.997	0.300338	-1.35466	Down	MGI:1194912				>node 2 information	Bmi1	ENSMUSG00000026739	17.039	25.2217	21.1303	0.387249	0.721	0.279206	-1.48023	Down	MGI:88174	cell proliferation;cell differentiation
>interaction	Srsf3	Thoc2	10090.ENSMUSP00000117045	10090.ENSMUSP00000044677	0	0	0	0	0.102	0	0.9	0.215	0.923	>node 1 information	Srsf3	ENSMUSG00000071172	29.2949	42.2882	35.7916	0.363027	0.871	0.316197	-1.44353	Down	MGI:98285				>node 2 information	Thoc2	ENSMUSG00000037475	14.1102	22.1095	18.1099	0.44171	0.674	0.297712	-1.56692	Down	MGI:2442413	cell differentiation
>interaction	Cul3	Psmd6	10090.ENSMUSP00000130738	10090.ENSMUSP00000022256	0	0	0	0	0.215	0	0.9	0.107	0.923	>node 1 information	Cul3	ENSMUSG00000004364	46.4411	68.4015	57.4213	0.382443	0.959	0.366763	-1.47287	Down	MGI:1347360	cell differentiation			>node 2 information	Psmd6	ENSMUSG00000021737	40.3639	54.0615	47.2127	0.290125	0.93	0.269817	-1.33935	Down	MGI:1913663
>interaction	Tnks2	Psmd6	10090.ENSMUSP00000025729	10090.ENSMUSP00000022256	0	0	0	0	0.052	0.238	0.9	0.057	0.922	>node 1 information	Tnks2	ENSMUSG00000024811	20.2129	30.4729	25.3429	0.404846	0.773	0.312946	-1.5076	Down	MGI:1921743				>node 2 information	Psmd6	ENSMUSG00000021737	40.3639	54.0615	47.2127	0.290125	0.93	0.269817	-1.33935	Down	MGI:1913663
>interaction	Csnk1e	Fbxl3	10090.ENSMUSP00000113341	10090.ENSMUSP00000022720	0	0	0	0	0	0	0.9	0.257	0.922	>node 1 information	Csnk1e	ENSMUSG00000022433	60.3353	41.6457	50.9905	0.366531	0.943	0.345639	1.44878	Up	MGI:1351660				>node 2 information	Fbxl3	ENSMUSG00000022124	19.264	29.4556	24.3598	0.418378	0.763	0.319222	-1.52905	Down	MGI:1354702
>interaction	Rlim	Uba6	10090.ENSMUSP00000070662	10090.ENSMUSP00000035328	0	0	0	0	0.24	0.062	0.9	0	0.922	>node 1 information	Rlim	ENSMUSG00000056537	18.0654	30.5123	24.2889	0.512453	0.761	0.389977	-1.68899	Down	MGI:1342291				>node 2 information	Uba6	ENSMUSG00000035898	16.5199	28.092	22.3059	0.51879	0.736	0.381829	-1.70049	Down	MGI:1913894
>interaction	Srsf3	Snrpd2	10090.ENSMUSP00000117045	10090.ENSMUSP00000037597	0	0	0	0	0.2	0	0.9	0.105	0.922	>node 1 information	Srsf3	ENSMUSG00000071172	29.2949	42.2882	35.7916	0.363027	0.871	0.316197	-1.44353	Down	MGI:98285				>node 2 information	Snrpd2	ENSMUSG00000040824	48.1126	97.5585	72.8355	0.67887	0.981	0.665972	-2.02771	Down	MGI:98345
>interaction	Ube2d3	Epas1	10090.ENSMUSP00000101898	10090.ENSMUSP00000024954	0	0	0	0	0	0.089	0.913	0.094	0.922	>node 1 information	Ube2d3	ENSMUSG00000078578	18.9692	28.5682	23.7687	0.40385	0.754	0.304503	-1.50603	Down	MGI:1913355				>node 2 information	Epas1	ENSMUSG00000024140	23.1393	33.9955	28.5674	0.380021	0.807	0.306677	-1.46917	Down	MGI:109169	cell differentiation
>interaction	Cog5	Arcn1	10090.ENSMUSP00000044797	10090.ENSMUSP00000034607	0	0	0	0	0.141	0	0.9	0.171	0.922	>node 1 information	Cog5	ENSMUSG00000035933	15.5768	24.5444	20.0606	0.447026	0.705	0.315153	-1.5757	Down	MGI:2145130				>node 2 information	Arcn1	ENSMUSG00000032096	36.1421	50.5648	43.3535	0.332677	0.912	0.303402	-1.39906	Down	MGI:2387591
>interaction	Gnai1	Lpar3	10090.ENSMUSP00000074259	10090.ENSMUSP00000037712	0	0	0	0	0	0.15	0.906	0.1	0.922	>node 1 information	Gnai1	ENSMUSG00000057614	8.8623	19.5502	14.2063	0.752338	0.612	0.460431	-2.206	Down	MGI:95771				>node 2 information	Lpar3	ENSMUSG00000036832	16.1782	34.0462	25.1122	0.711527	0.771	0.548587	-2.10445	Down	MGI:1929469	cell differentiation
>interaction	Cnot7	Paip1	10090.ENSMUSP00000034012	10090.ENSMUSP00000026520	0	0	0	0	0.094	0	0.9	0.218	0.922	>node 1 information	Cnot7	ENSMUSG00000031601	33.9047	53.7605	43.8326	0.452992	0.915	0.414487	-1.58564	Down	MGI:1298230	cell proliferation	abnormal male fertility		>node 2 information	Paip1	ENSMUSG00000025451	25.2871	41.7648	33.526	0.491491	0.851	0.418259	-1.65162	Down	MGI:2384993
>interaction	Top2a	Bub1	10090.ENSMUSP00000068896	10090.ENSMUSP00000028858	0	0	0	0	0.871	0.047	0	0.416	0.922	>node 1 information	Top2a	ENSMUSG00000020914	47.0462	64.8343	55.9402	0.317984	0.955	0.303675	-1.3781	Down	MGI:98790	cell differentiation			>node 2 information	Bub1	ENSMUSG00000027379	25.1238	36.3607	30.7422	0.36552	0.828	0.30265	-1.44726	Down	MGI:1100510		abnormal male fertility;abnormal spermatogenesis
>interaction	Asf1a	Asf1b	10090.ENSMUSP00000020004	10090.ENSMUSP00000005607	0	0	0	0.978	0.075	0.918	0	0.787	0.922	>node 1 information	Asf1a	ENSMUSG00000019857	17.906	39.0871	28.4965	0.743286	0.806	0.599089	-2.18291	Down	MGI:1913653	cell differentiation			>node 2 information	Asf1b	ENSMUSG00000005470	72.1413	101.487	86.8141	0.338029	0.99	0.334649	-1.40678	Down	MGI:1914179
>interaction	Eps15	Vamp3	10090.ENSMUSP00000099790	10090.ENSMUSP00000030797	0	0	0	0	0.05	0.046	0.9	0.248	0.922	>node 1 information	Eps15	ENSMUSG00000028552	34.5706	56.7453	45.6579	0.48567	0.923	0.448273	-1.64143	Down	MGI:104583	cell proliferation			>node 2 information	Vamp3	ENSMUSG00000028955	26.1553	43.0929	34.6241	0.489185	0.86	0.420699	-1.64758	Down	MGI:1321389	cell differentiation
>interaction	Mgst1	Adh1	10090.ENSMUSP00000008684	10090.ENSMUSP00000004232	0	0	0	0	0.16	0	0.9	0.152	0.922	>node 1 information	Mgst1	ENSMUSG00000008540	35.8576	54.8446	45.3511	0.418667	0.921	0.385592	-1.52951	Down	MGI:1913850				>node 2 information	Adh1	ENSMUSG00000074207	28.7479	10.0193	19.3836	0.966209	0.695	0.671515	2.86925	Up	MGI:87921
>interaction	Eps15	Tfrc	10090.ENSMUSP00000099790	10090.ENSMUSP00000023486	0	0	0	0	0.054	0.111	0.9	0.188	0.922	>node 1 information	Eps15	ENSMUSG00000028552	34.5706	56.7453	45.6579	0.48567	0.923	0.448273	-1.64143	Down	MGI:104583	cell proliferation			>node 2 information	Tfrc	ENSMUSG00000022797	25.1625	45.0408	35.1016	0.566307	0.865	0.489855	-1.79	Down	MGI:98822	cell proliferation;cell differentiation
>interaction	Ube2d3	Vhl	10090.ENSMUSP00000101898	10090.ENSMUSP00000039418	0	0	0	0	0	0.102	0.915	0.043	0.921	>node 1 information	Ube2d3	ENSMUSG00000078578	18.9692	28.5682	23.7687	0.40385	0.754	0.304503	-1.50603	Down	MGI:1913355				>node 2 information	Vhl	ENSMUSG00000033933	24.7419	36.1859	30.4639	0.375658	0.824	0.309542	-1.46254	Down	MGI:103223	cell proliferation;cell differentiation	abnormal male fertility
>interaction	Pafah1b1	Cdk1	10090.ENSMUSP00000021091	10090.ENSMUSP00000020099	0	0	0	0	0.053	0.053	0.9	0.229	0.921	>node 1 information	Pafah1b1	ENSMUSG00000020745	37.7155	55.4333	46.5744	0.380419	0.928	0.353029	-1.46978	Down	MGI:109520	cell proliferation;cell differentiation	abnormal male fertility		>node 2 information	Cdk1	ENSMUSG00000019942	57.6102	40.4389	49.0245	0.350259	0.936	0.327843	1.42462	Up	MGI:88351	cell proliferation;cell differentiation
>interaction	Ube2e1	Psmd6	10090.ENSMUSP00000022296	10090.ENSMUSP00000022256	0	0	0	0	0.242	0.047	0.9	0	0.921	>node 1 information	Ube2e1	ENSMUSG00000021774	30.807	46.123	38.465	0.39818	0.887	0.353186	-1.49716	Down	MGI:107411				>node 2 information	Psmd6	ENSMUSG00000021737	40.3639	54.0615	47.2127	0.290125	0.93	0.269817	-1.33935	Down	MGI:1913663
>interaction	Hist1h2af	Smc1b	10090.ENSMUSP00000072989	10090.ENSMUSP00000023068	0	0	0	0	0.05	0.111	0.911	0.083	0.921	>node 1 information	Hist1h2af	ENSMUSG00000061991	3.23177	0.591375	1.91157	1.38127	0.297	0.410237	5.46484	Up	MGI:2448309				>node 2 information	Smc1b	ENSMUSG00000022432	31.3255	53.9162	42.6208	0.530039	0.909	0.481805	-1.72116	Down	MGI:2154049		abnormal male fertility
>interaction	H2-T23	Canx	10090.ENSMUSP00000099739	10090.ENSMUSP00000020637	0	0	0	0	0	0.101	0.9	0.202	0.921	>node 1 information	H2-T23	ENSMUSG00000067212	0.189335	1.37218	0.780757	1.515	0.219	0.331784	-7.24737	Down	MGI:95957	cell proliferation			>node 2 information	Canx	ENSMUSG00000020368	40.6854	58.0446	49.365	0.35165	0.938	0.329848	-1.42667	Down	MGI:88261
>interaction	Paip1	Cnot6	10090.ENSMUSP00000026520	10090.ENSMUSP00000020624	0	0	0	0	0.053	0	0.9	0.233	0.921	>node 1 information	Paip1	ENSMUSG00000025451	25.2871	41.7648	33.526	0.491491	0.851	0.418259	-1.65162	Down	MGI:2384993				>node 2 information	Cnot6	ENSMUSG00000020362	22.6818	33.5257	28.1038	0.385852	0.803	0.309839	-1.47809	Down	MGI:2144529	cell proliferation
>interaction	Sct	Lhcgr	10090.ENSMUSP00000128729	10090.ENSMUSP00000024916	0	0	0	0	0	0	0.9	0.243	0.921	>node 1 information	Sct	ENSMUSG00000038580	3.12958	0.172299	1.65094	1.79127	0.282	0.505139	18.1637	Up	MGI:99466				>node 2 information	Lhcgr	ENSMUSG00000024107	3.84609	0.8625	2.3543	1.2673	0.317	0.401733	4.45923	Up	MGI:96783	cell differentiation	abnormal male fertility
>interaction	Skp1a	Cops5	10090.ENSMUSP00000038744	10090.ENSMUSP00000027050	0	0	0	0	0.215	0.778	0	0.585	0.921	>node 1 information	Skp1a	ENSMUSG00000036309	50.0088	80.2426	65.1257	0.464238	0.972	0.451239	-1.60457	Down	MGI:103575				>node 2 information	Cops5	ENSMUSG00000025917	26.1005	36.3417	31.2211	0.328022	0.832	0.272914	-1.39238	Down	MGI:1349415
>interaction	Srsf7	Nudt21	10090.ENSMUSP00000070983	10090.ENSMUSP00000034204	0	0	0	0	0.188	0	0.9	0.113	0.921	>node 1 information	Srsf7	ENSMUSG00000024097	37.097	50.8106	43.9538	0.312	0.916	0.285792	-1.36967	Down	MGI:1926232				>node 2 information	Nudt21	ENSMUSG00000031754	3.47487	8.94399	6.20943	0.880776	0.434	0.382257	-2.57391	Down	MGI:1915469
>interaction	Tap2	Canx	10090.ENSMUSP00000025197	10090.ENSMUSP00000020637	0	0	0	0	0.049	0.099	0.9	0.194	0.921	>node 1 information	Tap2	ENSMUSG00000024339	4.4707	9.98541	7.22805	0.76296	0.461	0.351724	-2.23352	Down	MGI:98484				>node 2 information	Canx	ENSMUSG00000020368	40.6854	58.0446	49.365	0.35165	0.938	0.329848	-1.42667	Down	MGI:88261
>interaction	Exosc3	Nop58	10090.ENSMUSP00000030003	10090.ENSMUSP00000027174	0	0	0	0	0.223	0.044	0.9	0.064	0.921	>node 1 information	Exosc3	ENSMUSG00000028322	23.8198	38.9875	31.4036	0.482992	0.834	0.402815	-1.63677	Down	MGI:1913612				>node 2 information	Nop58	ENSMUSG00000026020	38.1776	55.3223	46.7499	0.366732	0.929	0.340694	-1.44908	Down	MGI:1933184
>interaction	Hist1h2af	Jun	10090.ENSMUSP00000072989	10090.ENSMUSP00000054270	0	0	0	0	0	0.046	0.917	0.065	0.92	>node 1 information	Hist1h2af	ENSMUSG00000061991	3.23177	0.591375	1.91157	1.38127	0.297	0.410237	5.46484	Up	MGI:2448309				>node 2 information	Jun	ENSMUSG00000052684	51.1912	37.6828	44.437	0.30399	0.917	0.278759	1.35848	Up	MGI:96646	cell proliferation;cell differentiation
>interaction	Ncor2	Ar	10090.ENSMUSP00000083250	10090.ENSMUSP00000052648	0	0	0	0	0	0.586	0.209	0.775	0.92	>node 1 information	Ncor2	ENSMUSG00000029478	77.2072	56.488	66.8476	0.309947	0.974	0.301888	1.36679	Up	MGI:1337080	cell proliferation;cell differentiation			>node 2 information	Ar	ENSMUSG00000046532	4.1779	8.24055	6.20922	0.654293	0.434	0.283963	-1.97241	Down	MGI:88064	cell proliferation;cell differentiation	abnormal male fertility;abnormal spermatogenesis
>interaction	Ndufa3	Ndufaf3	10090.ENSMUSP00000075953	10090.ENSMUSP00000073832	0	0	0	0	0.146	0	0.9	0.143	0.92	>node 1 information	Ndufa3	ENSMUSG00000035674	119.371	159.297	139.334	0.286549	0.999	0.286262	-1.33447	Down	MGI:1913341				>node 2 information	Ndufaf3	ENSMUSG00000070283	1.95761	6.09648	4.02705	1.02777	0.375	0.385413	-3.11425	Down	MGI:1913956
>interaction	Hist1h3c	Hist1h2aa	10090.ENSMUSP00000089346	10090.ENSMUSP00000072227	0	0	0	0	0.671	0.511	0	0.544	0.92	>node 1 information	Hist1h3c	ENSMUSG00000069310	2.0088	0.542508	1.27565	1.14944	0.26	0.298855	3.7028	Up	MGI:2448320				>node 2 information	Hist1h2aa	ENSMUSG00000060081	0.22077	1.48228	0.851525	1.48147	0.226	0.334813	-6.71414	Down	MGI:2448285
>interaction	Fbxo2	Uba6	10090.ENSMUSP00000037377	10090.ENSMUSP00000035328	0	0	0	0	0	0	0.917	0.08	0.92	>node 1 information	Fbxo2	ENSMUSG00000041556	5.71803	2.21126	3.96464	0.88451	0.374	0.330807	2.58587	Up	MGI:2446216	cell proliferation			>node 2 information	Uba6	ENSMUSG00000035898	16.5199	28.092	22.3059	0.51879	0.736	0.381829	-1.70049	Down	MGI:1913894
>interaction	Msn	Rock2	10090.ENSMUSP00000113071	10090.ENSMUSP00000020904	0	0	0	0	0.08	0.1	0.528	0.82	0.92	>node 1 information	Msn	ENSMUSG00000031207	15.1575	7.9161	11.5368	0.627678	0.56	0.3515	1.91477	Up	MGI:97167	cell proliferation;cell differentiation			>node 2 information	Rock2	ENSMUSG00000020580	19.4463	28.964	24.2051	0.39321	0.76	0.298839	-1.48944	Down	MGI:107926	cell differentiation
>interaction	Ephx1	Mgst1	10090.ENSMUSP00000047551	10090.ENSMUSP00000008684	0	0	0	0	0.098	0	0.9	0.177	0.919	>node 1 information	Ephx1	ENSMUSG00000038776	12.6996	4.17423	8.43692	1.01048	0.488	0.493116	3.04238	Up	MGI:95405				>node 2 information	Mgst1	ENSMUSG00000008540	35.8576	54.8446	45.3511	0.418667	0.921	0.385592	-1.52951	Down	MGI:1913850
>interaction	Hist1h2aa	Tada2b	10090.ENSMUSP00000072227	10090.ENSMUSP00000031097	0	0	0	0	0.051	0.143	0.9	0.129	0.919	>node 1 information	Hist1h2aa	ENSMUSG00000060081	0.22077	1.48228	0.851525	1.48147	0.226	0.334813	-6.71414	Down	MGI:2448285				>node 2 information	Tada2b	ENSMUSG00000029196	6.34942	11.2812	8.81531	0.559456	0.497	0.27805	-1.77673	Down	MGI:3035274
>interaction	Eif1ax	Eif3m	10090.ENSMUSP00000084387	10090.ENSMUSP00000028592	0	0	0	0	0.227	0	0.9	0	0.919	>node 1 information	Eif1ax	ENSMUSG00000067194	11.7703	18.7653	15.2678	0.458154	0.631	0.289095	-1.59429	Down	MGI:1913485				>node 2 information	Eif3m	ENSMUSG00000027170	4.91709	9.44787	7.18248	0.63081	0.46	0.290173	-1.92144	Down	MGI:1351744
>interaction	Eif1ax	Rpl19	10090.ENSMUSP00000084387	10090.ENSMUSP00000017548	0	0	0	0	0.186	0	0.9	0.089	0.919	>node 1 information	Eif1ax	ENSMUSG00000067194	11.7703	18.7653	15.2678	0.458154	0.631	0.289095	-1.59429	Down	MGI:1913485				>node 2 information	Rpl19	ENSMUSG00000017404	16.2771	4.48338	10.3802	1.13617	0.534	0.606715	3.63054	Up	MGI:98020
>interaction	Eps15	Actr3	10090.ENSMUSP00000099790	10090.ENSMUSP00000027579	0	0	0	0	0.116	0.104	0.9	0.104	0.919	>node 1 information	Eps15	ENSMUSG00000028552	34.5706	56.7453	45.6579	0.48567	0.923	0.448273	-1.64143	Down	MGI:104583	cell proliferation			>node 2 information	Actr3	ENSMUSG00000026341	31.0107	50.3094	40.66	0.474635	0.899	0.426697	-1.62232	Down	MGI:1921367	cell differentiation
>interaction	Psma6	Cdk1	10090.ENSMUSP00000021412	10090.ENSMUSP00000020099	0	0	0	0	0.124	0.11	0.9	0.077	0.918	>node 1 information	Psma6	ENSMUSG00000021024	49.725	69.4944	59.6097	0.331647	0.963	0.319376	-1.39757	Down	MGI:1347006				>node 2 information	Cdk1	ENSMUSG00000019942	57.6102	40.4389	49.0245	0.350259	0.936	0.327843	1.42462	Up	MGI:88351	cell proliferation;cell differentiation
>interaction	Gsta4	Gpx7	10090.ENSMUSP00000034903	10090.ENSMUSP00000030332	0	0	0	0	0	0	0.9	0.219	0.918	>node 1 information	Gsta4	ENSMUSG00000032348	74.9758	99.7241	87.35	0.283324	0.99	0.28049	-1.33008	Down	MGI:1309515				>node 2 information	Gpx7	ENSMUSG00000028597	12.2784	6.4797	9.37905	0.618261	0.511	0.315931	1.8949	Up	MGI:1914555
>interaction	Gnai1	Drd4	10090.ENSMUSP00000074259	10090.ENSMUSP00000026569	0	0	0	0	0	0.15	0.906	0.056	0.918	>node 1 information	Gnai1	ENSMUSG00000057614	8.8623	19.5502	14.2063	0.752338	0.612	0.460431	-2.206	Down	MGI:95771				>node 2 information	Drd4	ENSMUSG00000025496	9.8926	26.0747	17.9837	0.899823	0.673	0.605581	-2.63578	Down	MGI:94926
>interaction	Plxnb1	Rock1	10090.ENSMUSP00000071966	10090.ENSMUSP00000069549	0	0	0	0	0.09	0	0.9	0.17	0.917	>node 1 information	Plxnb1	ENSMUSG00000053646	20.5995	12.6531	16.6263	0.477942	0.652	0.311618	1.62802	Up	MGI:2154238	cell proliferation;cell differentiation			>node 2 information	Rock1	ENSMUSG00000024290	18.0534	29.2585	23.656	0.473669	0.752	0.356199	-1.62066	Down	MGI:107927	cell differentiation
>interaction	Egr2	Suz12	10090.ENSMUSP00000041053	10090.ENSMUSP00000017692	0	0	0	0	0	0.07	0.91	0.086	0.917	>node 1 information	Egr2	ENSMUSG00000037868	16.8282	8.77512	12.8017	0.629065	0.585	0.368003	1.91772	Up	MGI:95296	cell differentiation			>node 2 information	Suz12	ENSMUSG00000017548	25.5889	40.6406	33.1148	0.454532	0.848	0.385443	-1.58821	Down	MGI:1261758	cell proliferation;cell differentiation
>interaction	Srsf7	Snrpd2	10090.ENSMUSP00000070983	10090.ENSMUSP00000037597	0	0	0	0	0.207	0	0.9	0	0.917	>node 1 information	Srsf7	ENSMUSG00000024097	37.097	50.8106	43.9538	0.312	0.916	0.285792	-1.36967	Down	MGI:1926232				>node 2 information	Snrpd2	ENSMUSG00000040824	48.1126	97.5585	72.8355	0.67887	0.981	0.665972	-2.02771	Down	MGI:98345
>interaction	Skp1a	Psma6	10090.ENSMUSP00000038744	10090.ENSMUSP00000021412	0	0	0	0	0.193	0.06	0.9	0	0.917	>node 1 information	Skp1a	ENSMUSG00000036309	50.0088	80.2426	65.1257	0.464238	0.972	0.451239	-1.60457	Down	MGI:103575				>node 2 information	Psma6	ENSMUSG00000021024	49.725	69.4944	59.6097	0.331647	0.963	0.319376	-1.39757	Down	MGI:1347006
>interaction	Csnk1e	Tubg1	10090.ENSMUSP00000113341	10090.ENSMUSP00000048036	0	0	0	0	0.098	0.115	0.9	0.084	0.917	>node 1 information	Csnk1e	ENSMUSG00000022433	60.3353	41.6457	50.9905	0.366531	0.943	0.345639	1.44878	Up	MGI:1351660				>node 2 information	Tubg1	ENSMUSG00000035198	60.2912	42.6845	51.4879	0.341958	0.945	0.323151	1.41248	Up	MGI:101834
>interaction	Gpx7	Ggt7	10090.ENSMUSP00000030332	10090.ENSMUSP00000029131	0	0	0	0	0.073	0	0.9	0.185	0.917	>node 1 information	Gpx7	ENSMUSG00000028597	12.2784	6.4797	9.37905	0.618261	0.511	0.315931	1.8949	Up	MGI:1914555				>node 2 information	Ggt7	ENSMUSG00000027603	8.76308	4.19023	6.47666	0.706051	0.44	0.310663	2.09131	Up	MGI:1913385
>interaction	Amd1	Mat2b	10090.ENSMUSP00000097528	10090.ENSMUSP00000048222	0	0	0	0	0.052	0	0.9	0.202	0.917	>node 1 information	Amd1	ENSMUSG00000075232	26.57	39.2758	32.9229	0.385926	0.847	0.326879	-1.4782	Down	MGI:88004				>node 2 information	Mat2b	ENSMUSG00000042032	39.1255	53.144	46.1347	0.30386	0.926	0.281374	-1.3583	Down	MGI:1913667
>interaction	Srsf2	Thoc2	10090.ENSMUSP00000090059	10090.ENSMUSP00000044677	0	0	0	0	0	0	0.9	0.202	0.916	>node 1 information	Srsf2	ENSMUSG00000034120	58.934	85.9297	72.4318	0.372705	0.981	0.365623	-1.45807	Down	MGI:98284				>node 2 information	Thoc2	ENSMUSG00000037475	14.1102	22.1095	18.1099	0.44171	0.674	0.297712	-1.56692	Down	MGI:2442413	cell differentiation
>interaction	Smc4	Smc6	10090.ENSMUSP00000047872	10090.ENSMUSP00000020931	0	0	0	0	0.701	0	0	0.731	0.916	>node 1 information	Smc4	ENSMUSG00000034349	22.8962	42.0519	32.474	0.589877	0.842	0.496677	-1.83663	Down	MGI:1917349				>node 2 information	Smc6	ENSMUSG00000020608	35.9419	50.198	43.0699	0.330999	0.912	0.301871	-1.39664	Down	MGI:1914491
>interaction	Pf4	Serping1	10090.ENSMUSP00000031320	10090.ENSMUSP00000023994	0	0	0	0	0	0	0.9	0.202	0.916	>node 1 information	Pf4	ENSMUSG00000029373	5.26837	1.96588	3.61713	0.913015	0.362	0.330511	2.6799	Up	MGI:1888711	cell proliferation;cell differentiation			>node 2 information	Serping1	ENSMUSG00000023224	2.76028	0.941322	1.8508	0.982795	0.294	0.288942	2.93234	Up	MGI:894696
>interaction	Stx18	Stx12	10090.ENSMUSP00000109761	10090.ENSMUSP00000030698	0	0	0	0	0.076	0.729	0.54	0.359	0.916	>node 1 information	Stx18	ENSMUSG00000029125	14.129	7.79985	10.9644	0.577244	0.547	0.315753	1.81145	Up	MGI:1918366				>node 2 information	Stx12	ENSMUSG00000028879	21.6135	35.9713	28.7924	0.498666	0.809	0.403421	-1.6643	Down	MGI:1931027
>interaction	Rbbp4	Sall1	10090.ENSMUSP00000099658	10090.ENSMUSP00000034090	0	0	0	0	0.069	0.062	0.9	0.154	0.916	>node 1 information	Rbbp4	ENSMUSG00000057236	103.011	139.545	121.278	0.301242	0.997	0.300338	-1.35466	Down	MGI:1194912				>node 2 information	Sall1	ENSMUSG00000031665	17.6123	9.3015	13.4569	0.617587	0.597	0.368699	1.89349	Up	MGI:1889585	cell proliferation;cell differentiation
>interaction	Pmf1	Cdk1	10090.ENSMUSP00000062420	10090.ENSMUSP00000020099	0	0	0	0	0.201	0	0.9	0	0.916	>node 1 information	Pmf1	ENSMUSG00000028066	64.6266	45.8186	55.2226	0.340585	0.954	0.324918	1.41049	Up	MGI:1914287				>node 2 information	Cdk1	ENSMUSG00000019942	57.6102	40.4389	49.0245	0.350259	0.936	0.327843	1.42462	Up	MGI:88351	cell proliferation;cell differentiation
>interaction	Srsf6	Nudt21	10090.ENSMUSP00000119065	10090.ENSMUSP00000034204	0	0	0	0	0.108	0.1	0.9	0.084	0.916	>node 1 information	Srsf6	ENSMUSG00000016921	38.555	52.7262	45.6406	0.310495	0.923	0.286587	-1.36756	Down	MGI:1915246	cell proliferation;cell differentiation			>node 2 information	Nudt21	ENSMUSG00000031754	3.47487	8.94399	6.20943	0.880776	0.434	0.382257	-2.57391	Down	MGI:1915469
>interaction	Ube2c	Psmd14	10090.ENSMUSP00000085581	10090.ENSMUSP00000028278	0	0	0	0	0.126	0	0.9	0.115	0.916	>node 1 information	Ube2c	ENSMUSG00000001403	47.8028	33.7011	40.752	0.346037	0.9	0.311434	1.41843	Up	MGI:1915862				>node 2 information	Psmd14	ENSMUSG00000026914	35.7514	55.7193	45.7353	0.436597	0.924	0.403415	-1.55852	Down	MGI:1913284
>interaction	Usp47	Gmps	10090.ENSMUSP00000102264	10090.ENSMUSP00000029405	0	0	0	0	0.207	0.894	0	0.09	0.916	>node 1 information	Usp47	ENSMUSG00000059263	33.1431	44.9594	39.0513	0.302584	0.89	0.2693	-1.35652	Down	MGI:1922246				>node 2 information	Gmps	ENSMUSG00000027823	30.2407	41.7003	35.9705	0.318583	0.871	0.277486	-1.37895	Down	MGI:2448526
>interaction	Cops2	Psma6	10090.ENSMUSP00000028635	10090.ENSMUSP00000021412	0	0	0	0	0.328	0.822	0.344	0.063	0.916	>node 1 information	Cops2	ENSMUSG00000027206	25.3319	35.7837	30.5578	0.342034	0.826	0.28252	-1.41259	Down	MGI:1330276	cell proliferation;cell differentiation			>node 2 information	Psma6	ENSMUSG00000021024	49.725	69.4944	59.6097	0.331647	0.963	0.319376	-1.39757	Down	MGI:1347006
>interaction	Mrps14	Mrpl40	10090.ENSMUSP00000120075	10090.ENSMUSP00000023391	0	0	0	0	0.195	0	0.9	0	0.916	>node 1 information	Mrps14	ENSMUSG00000058267	9.76211	16.5502	13.1562	0.515963	0.591	0.304934	-1.69535	Down	MGI:1928141				>node 2 information	Mrpl40	ENSMUSG00000022706	25.7857	17.1568	21.4713	0.401882	0.725	0.291364	1.50294	Up	MGI:1332635
>interaction	Picalm	Actr3	10090.ENSMUSP00000051092	10090.ENSMUSP00000027579	0	0	0	0	0.158	0	0.9	0.08	0.915	>node 1 information	Picalm	ENSMUSG00000039361	33.0181	46.863	39.9406	0.346638	0.895	0.310241	-1.41931	Down	MGI:2385902	cell proliferation;cell differentiation			>node 2 information	Actr3	ENSMUSG00000026341	31.0107	50.3094	40.66	0.474635	0.899	0.426697	-1.62232	Down	MGI:1921367	cell differentiation
>interaction	Ube2e1	Cdk1	10090.ENSMUSP00000022296	10090.ENSMUSP00000020099	0	0	0	0	0.06	0.115	0.9	0.099	0.915	>node 1 information	Ube2e1	ENSMUSG00000021774	30.807	46.123	38.465	0.39818	0.887	0.353186	-1.49716	Down	MGI:107411				>node 2 information	Cdk1	ENSMUSG00000019942	57.6102	40.4389	49.0245	0.350259	0.936	0.327843	1.42462	Up	MGI:88351	cell proliferation;cell differentiation
>interaction	Vamp3	Tfrc	10090.ENSMUSP00000030797	10090.ENSMUSP00000023486	0	0	0	0	0.051	0	0.9	0.179	0.915	>node 1 information	Vamp3	ENSMUSG00000028955	26.1553	43.0929	34.6241	0.489185	0.86	0.420699	-1.64758	Down	MGI:1321389	cell differentiation			>node 2 information	Tfrc	ENSMUSG00000022797	25.1625	45.0408	35.1016	0.566307	0.865	0.489855	-1.79	Down	MGI:98822	cell proliferation;cell differentiation
>interaction	Tubg1	Nde1	10090.ENSMUSP00000048036	10090.ENSMUSP00000023359	0	0	0	0	0.112	0.107	0.9	0.064	0.915	>node 1 information	Tubg1	ENSMUSG00000035198	60.2912	42.6845	51.4879	0.341958	0.945	0.323151	1.41248	Up	MGI:101834				>node 2 information	Nde1	ENSMUSG00000022678	31.929	21.2906	26.6098	0.399793	0.786	0.314237	1.49968	Up	MGI:1914453	cell proliferation;cell differentiation
>interaction	Ppp1cc	Ppp1cb	10090.ENSMUSP00000099587	10090.ENSMUSP00000015100	0	0	0.527	0.987	0.112	0.554	0.8	0.555	0.915	>node 1 information	Ppp1cc	ENSMUSG00000004455	31.299	43.4603	37.3796	0.325345	0.88	0.286304	-1.38855	Down	MGI:104872	cell differentiation	abnormal male fertility		>node 2 information	Ppp1cb	ENSMUSG00000014956	33.4212	51.1162	42.2687	0.418631	0.907	0.379699	-1.52945	Down	MGI:104871
>interaction	Kif22	Arf4	10090.ENSMUSP00000032915	10090.ENSMUSP00000022429	0	0	0	0	0.053	0.109	0.902	0.097	0.915	>node 1 information	Kif22	ENSMUSG00000030677	20.6472	30.3917	25.5194	0.381846	0.775	0.295931	-1.47195	Down	MGI:109233				>node 2 information	Arf4	ENSMUSG00000021877	29.5103	47.5103	38.5103	0.467407	0.887	0.41459	-1.60996	Down	MGI:99433
>interaction	Ppp1cc	Pafah1b1	10090.ENSMUSP00000099587	10090.ENSMUSP00000021091	0	0	0	0	0.09	0.115	0.9	0.066	0.914	>node 1 information	Ppp1cc	ENSMUSG00000004455	31.299	43.4603	37.3796	0.325345	0.88	0.286304	-1.38855	Down	MGI:104872	cell differentiation	abnormal male fertility		>node 2 information	Pafah1b1	ENSMUSG00000020745	37.7155	55.4333	46.5744	0.380419	0.928	0.353029	-1.46978	Down	MGI:109520	cell proliferation;cell differentiation	abnormal male fertility
>interaction	Nphp4	Nde1	10090.ENSMUSP00000049920	10090.ENSMUSP00000023359	0	0	0	0	0.051	0	0.9	0.176	0.914	>node 1 information	Nphp4	ENSMUSG00000039577	15.0623	9.15151	12.1069	0.488216	0.572	0.27926	1.64588	Up	MGI:2384210	cell differentiation	abnormal male fertility		>node 2 information	Nde1	ENSMUSG00000022678	31.929	21.2906	26.6098	0.399793	0.786	0.314237	1.49968	Up	MGI:1914453	cell proliferation;cell differentiation
>interaction	Usp9x	Gmps	10090.ENSMUSP00000086716	10090.ENSMUSP00000029405	0	0	0	0	0.18	0.894	0	0.09	0.914	>node 1 information	Usp9x	ENSMUSG00000031010	25.335	42.167	33.751	0.498711	0.853	0.425401	-1.66438	Down	MGI:894681	cell differentiation			>node 2 information	Gmps	ENSMUSG00000027823	30.2407	41.7003	35.9705	0.318583	0.871	0.277486	-1.37895	Down	MGI:2448526
>interaction	Exoc5	Myh9	10090.ENSMUSP00000125434	10090.ENSMUSP00000016771	0	0	0	0	0.054	0.078	0.9	0.132	0.914	>node 1 information	Exoc5	ENSMUSG00000061244	7.66296	17.1815	12.4222	0.766251	0.577	0.442127	-2.24215	Down	MGI:2145645				>node 2 information	Myh9	ENSMUSG00000022443	52.4866	38.5127	45.4997	0.307121	0.922	0.283166	1.36284	Up	MGI:107717	cell differentiation
>interaction	Hnrnph1	Nudt21	10090.ENSMUSP00000070503	10090.ENSMUSP00000034204	0	0	0	0	0.152	0	0.9	0.072	0.914	>node 1 information	Hnrnph1	ENSMUSG00000007850	59.2193	84.1137	71.6665	0.347365	0.98	0.340417	-1.42038	Down	MGI:1891925				>node 2 information	Nudt21	ENSMUSG00000031754	3.47487	8.94399	6.20943	0.880776	0.434	0.382257	-2.57391	Down	MGI:1915469
>interaction	Ccne2	Pkmyt1	10090.ENSMUSP00000103960	10090.ENSMUSP00000024701	0	0	0	0	0.125	0	0.9	0.105	0.914	>node 1 information	Ccne2	ENSMUSG00000028212	9.17713	18.8589	14.018	0.690666	0.609	0.420616	-2.05499	Down	MGI:1329034		abnormal male fertility;abnormal spermatogenesis		>node 2 information	Pkmyt1	ENSMUSG00000023908	12.409	7.34801	9.87851	0.512323	0.523	0.267945	1.68876	Up	MGI:2137630
>interaction	Arl1	Cog5	10090.ENSMUSP00000111942	10090.ENSMUSP00000044797	0	0	0	0	0.07	0	0.9	0.155	0.914	>node 1 information	Arl1	ENSMUSG00000060904	45.25	63.14	54.195	0.330104	0.952	0.314259	-1.39536	Down	MGI:99436				>node 2 information	Cog5	ENSMUSG00000035933	15.5768	24.5444	20.0606	0.447026	0.705	0.315153	-1.5757	Down	MGI:2145130
>interaction	Nphp4	Pafah1b1	10090.ENSMUSP00000049920	10090.ENSMUSP00000021091	0	0	0	0	0.097	0	0.9	0.117	0.913	>node 1 information	Nphp4	ENSMUSG00000039577	15.0623	9.15151	12.1069	0.488216	0.572	0.27926	1.64588	Up	MGI:2384210	cell differentiation	abnormal male fertility		>node 2 information	Pafah1b1	ENSMUSG00000020745	37.7155	55.4333	46.5744	0.380419	0.928	0.353029	-1.46978	Down	MGI:109520	cell proliferation;cell differentiation	abnormal male fertility
>interaction	Rps6kb1	Rragb	10090.ENSMUSP00000119715	10090.ENSMUSP00000039013	0	0	0	0	0.053	0.073	0.9	0.13	0.913	>node 1 information	Rps6kb1	ENSMUSG00000020516	21.1689	32.9629	27.0659	0.435751	0.792	0.345115	-1.55714	Down	MGI:1270849	cell proliferation;cell differentiation			>node 2 information	Rragb	ENSMUSG00000041658	11.2252	21.2916	16.2584	0.619151	0.647	0.400591	-1.89677	Down	MGI:3038613
>interaction	Nhp2l1	Rpl19	10090.ENSMUSP00000091840	10090.ENSMUSP00000017548	0	0	0	0	0.703	0.647	0	0.239	0.913	>node 1 information	Nhp2l1	ENSMUSG00000063480	33.7821	45.8238	39.803	0.302533	0.895	0.270767	-1.35645	Down	MGI:893586				>node 2 information	Rpl19	ENSMUSG00000017404	16.2771	4.48338	10.3802	1.13617	0.534	0.606715	3.63054	Up	MGI:98020
>interaction	Mfap4	Fbln2	10090.ENSMUSP00000070848	10090.ENSMUSP00000048334	0	0	0	0	0.055	0.07	0.9	0.128	0.913	>node 1 information	Mfap4	ENSMUSG00000042436	5.73793	2.01819	3.87806	0.959175	0.371	0.355854	2.84311	Up	MGI:1342276				>node 2 information	Fbln2	ENSMUSG00000064080	23.3006	11.9597	17.6302	0.643267	0.667	0.429059	1.94826	Up	MGI:95488
>interaction	Ppp1r2	Ppp1cb	10090.ENSMUSP00000060118	10090.ENSMUSP00000015100	0	0	0	0	0.117	0.773	0.54	0.172	0.913	>node 1 information	Ppp1r2	ENSMUSG00000047714	11.8767	27.8198	19.8483	0.80325	0.702	0.563881	-2.34238	Down	MGI:1914099				>node 2 information	Ppp1cb	ENSMUSG00000014956	33.4212	51.1162	42.2687	0.418631	0.907	0.379699	-1.52945	Down	MGI:104871
>interaction	Tubg1	Iqcb1	10090.ENSMUSP00000048036	10090.ENSMUSP00000023535	0	0	0	0	0.054	0.075	0.9	0.131	0.913	>node 1 information	Tubg1	ENSMUSG00000035198	60.2912	42.6845	51.4879	0.341958	0.945	0.323151	1.41248	Up	MGI:101834				>node 2 information	Iqcb1	ENSMUSG00000022837	19.621	31.442	25.5315	0.462997	0.775	0.358822	-1.60247	Down	MGI:2443764	cell differentiation
>interaction	Eif3m	Rpl19	10090.ENSMUSP00000028592	10090.ENSMUSP00000017548	0	0	0	0	0.168	0	0.9	0	0.913	>node 1 information	Eif3m	ENSMUSG00000027170	4.91709	9.44787	7.18248	0.63081	0.46	0.290173	-1.92144	Down	MGI:1351744				>node 2 information	Rpl19	ENSMUSG00000017404	16.2771	4.48338	10.3802	1.13617	0.534	0.606715	3.63054	Up	MGI:98020
>interaction	Cyp26a1	Aldh1a7	10090.ENSMUSP00000025946	10090.ENSMUSP00000025656	0	0	0	0	0.049	0.106	0.9	0.107	0.913	>node 1 information	Cyp26a1	ENSMUSG00000024987	3.11557	7.43845	5.27701	0.819191	0.41	0.335868	-2.38751	Down	MGI:1096359	cell differentiation			>node 2 information	Aldh1a7	ENSMUSG00000024747	5.35988	10.4797	7.91979	0.646459	0.476	0.307715	-1.95521	Down	MGI:1347050
>interaction	Rab11a	Csnk1e	10090.ENSMUSP00000129163	10090.ENSMUSP00000113341	0	0	0	0	0.055	0.049	0.909	0.06	0.913	>node 1 information	Rab11a	ENSMUSG00000004771	33.5683	56.4305	44.9994	0.508056	0.92	0.467411	-1.68107	Down	MGI:1858202	cell differentiation			>node 2 information	Csnk1e	ENSMUSG00000022433	60.3353	41.6457	50.9905	0.366531	0.943	0.345639	1.44878	Up	MGI:1351660
>interaction	Flnb	Fblim1	10090.ENSMUSP00000052020	10090.ENSMUSP00000006381	0	0	0	0	0	0.78	0.146	0.579	0.913	>node 1 information	Flnb	ENSMUSG00000025278	21.4391	12.8181	17.1286	0.50331	0.66	0.332185	1.67256	Up	MGI:2446089	cell differentiation			>node 2 information	Fblim1	ENSMUSG00000006219	5.15086	2.09735	3.62411	0.842556	0.362	0.305005	2.45589	Up	MGI:1921452
>interaction	Gpx7	Ero1l	10090.ENSMUSP00000030332	10090.ENSMUSP00000022378	0	0	0	0	0.054	0.11	0.9	0.093	0.913	>node 1 information	Gpx7	ENSMUSG00000028597	12.2784	6.4797	9.37905	0.618261	0.511	0.315931	1.8949	Up	MGI:1914555				>node 2 information	Ero1l	ENSMUSG00000021831	18.7438	27.6887	23.2162	0.385286	0.747	0.287809	-1.47722	Down	MGI:1354385	cell differentiation
>interaction	Flna	Flnb	10090.ENSMUSP00000098997	10090.ENSMUSP00000052020	0	0	0	0.98	0.092	0.554	0.8	0.783	0.913	>node 1 information	Flna	ENSMUSG00000031328	38.0143	27.343	32.6786	0.326553	0.844	0.27561	1.39028	Up	MGI:95556	cell proliferation;cell differentiation			>node 2 information	Flnb	ENSMUSG00000025278	21.4391	12.8181	17.1286	0.50331	0.66	0.332185	1.67256	Up	MGI:2446089	cell differentiation
>interaction	Srsf3	Phf5a	10090.ENSMUSP00000117045	10090.ENSMUSP00000023117	0	0	0	0	0.144	0	0.9	0.059	0.912	>node 1 information	Srsf3	ENSMUSG00000071172	29.2949	42.2882	35.7916	0.363027	0.871	0.316197	-1.44353	Down	MGI:98285				>node 2 information	Phf5a	ENSMUSG00000061360	48.8673	67.1986	58.0329	0.315877	0.961	0.303558	-1.37512	Down	MGI:2156864
>interaction	Csnk1e	Tubg2	10090.ENSMUSP00000113341	10090.ENSMUSP00000045901	0	0	0	0	0.053	0.115	0.9	0.084	0.912	>node 1 information	Csnk1e	ENSMUSG00000022433	60.3353	41.6457	50.9905	0.366531	0.943	0.345639	1.44878	Up	MGI:1351660				>node 2 information	Tubg2	ENSMUSG00000045007	8.58332	3.79528	6.1893	0.7736	0.433	0.334969	2.26158	Up	MGI:2144208
>interaction	Ramp1	Adcyap1r1	10090.ENSMUSP00000095253	10090.ENSMUSP00000063784	0	0	0	0	0	0.077	0.9	0.126	0.912	>node 1 information	Ramp1	ENSMUSG00000034353	6.54412	2.92343	4.73377	0.764863	0.396	0.302886	2.23851	Up	MGI:1858418				>node 2 information	Adcyap1r1	ENSMUSG00000029778	8.31049	3.88397	6.09723	0.725989	0.431	0.312901	2.13969	Up	MGI:108449	cell differentiation
>interaction	Nt5e	Hprt	10090.ENSMUSP00000034992	10090.ENSMUSP00000026723	0	0	0	0	0	0	0.9	0.162	0.912	>node 1 information	Nt5e	ENSMUSG00000032420	24.2773	34.4179	29.3476	0.345534	0.814	0.281265	-1.4177	Down	MGI:99782				>node 2 information	Hprt	ENSMUSG00000025630	29.9106	41.64	35.7753	0.327863	0.87	0.285241	-1.39215	Down	MGI:96217	cell proliferation;cell differentiation
>interaction	Eps15	Arpc5	10090.ENSMUSP00000099790	10090.ENSMUSP00000076933	0	0	0	0	0	0	0.9	0.156	0.912	>node 1 information	Eps15	ENSMUSG00000028552	34.5706	56.7453	45.6579	0.48567	0.923	0.448273	-1.64143	Down	MGI:104583	cell proliferation			>node 2 information	Arpc5	ENSMUSG00000008475	22.2541	35.4329	28.8435	0.456908	0.809	0.369639	-1.5922	Down	MGI:1915021
>interaction	Psmd14	Tnks2	10090.ENSMUSP00000028278	10090.ENSMUSP00000025729	0	0	0	0	0.052	0.115	0.9	0.081	0.912	>node 1 information	Psmd14	ENSMUSG00000026914	35.7514	55.7193	45.7353	0.436597	0.924	0.403415	-1.55852	Down	MGI:1913284				>node 2 information	Tnks2	ENSMUSG00000024811	20.2129	30.4729	25.3429	0.404846	0.773	0.312946	-1.5076	Down	MGI:1921743
>interaction	Rbbp4	Egr2	10090.ENSMUSP00000099658	10090.ENSMUSP00000041053	0	0	0	0	0.053	0.062	0.908	0.06	0.912	>node 1 information	Rbbp4	ENSMUSG00000057236	103.011	139.545	121.278	0.301242	0.997	0.300338	-1.35466	Down	MGI:1194912				>node 2 information	Egr2	ENSMUSG00000037868	16.8282	8.77512	12.8017	0.629065	0.585	0.368003	1.91772	Up	MGI:95296	cell differentiation
>interaction	Dld	Ppm1k	10090.ENSMUSP00000106481	10090.ENSMUSP00000041395	0	0	0	0	0.052	0.073	0.9	0.117	0.912	>node 1 information	Dld	ENSMUSG00000020664	25.2514	39.3389	32.2951	0.436211	0.841	0.366853	-1.55789	Down	MGI:107450	cell differentiation			>node 2 information	Ppm1k	ENSMUSG00000037826	4.65591	8.64757	6.65174	0.600093	0.445	0.267041	-1.85733	Down	MGI:2442111
>interaction	Ube2e1	Psma6	10090.ENSMUSP00000022296	10090.ENSMUSP00000021412	0	0	0	0	0.156	0	0.9	0	0.912	>node 1 information	Ube2e1	ENSMUSG00000021774	30.807	46.123	38.465	0.39818	0.887	0.353186	-1.49716	Down	MGI:107411				>node 2 information	Psma6	ENSMUSG00000021024	49.725	69.4944	59.6097	0.331647	0.963	0.319376	-1.39757	Down	MGI:1347006
>interaction	Stx18	Arcn1	10090.ENSMUSP00000109761	10090.ENSMUSP00000034607	0	0	0	0	0.052	0.064	0.9	0.129	0.912	>node 1 information	Stx18	ENSMUSG00000029125	14.129	7.79985	10.9644	0.577244	0.547	0.315753	1.81145	Up	MGI:1918366				>node 2 information	Arcn1	ENSMUSG00000032096	36.1421	50.5648	43.3535	0.332677	0.912	0.303402	-1.39906	Down	MGI:2387591
>interaction	Vamp3	M6pr	10090.ENSMUSP00000030797	10090.ENSMUSP00000007602	0	0	0	0	0.052	0	0.9	0.152	0.912	>node 1 information	Vamp3	ENSMUSG00000028955	26.1553	43.0929	34.6241	0.489185	0.86	0.420699	-1.64758	Down	MGI:1321389	cell differentiation			>node 2 information	M6pr	ENSMUSG00000007458	16.8481	34.6051	25.7266	0.690219	0.777	0.536301	-2.05395	Down	MGI:96904
>interaction	Srsf7	Thoc2	10090.ENSMUSP00000070983	10090.ENSMUSP00000044677	0	0	0	0	0.117	0	0.9	0.086	0.912	>node 1 information	Srsf7	ENSMUSG00000024097	37.097	50.8106	43.9538	0.312	0.916	0.285792	-1.36967	Down	MGI:1926232				>node 2 information	Thoc2	ENSMUSG00000037475	14.1102	22.1095	18.1099	0.44171	0.674	0.297712	-1.56692	Down	MGI:2442413	cell differentiation
>interaction	Gmps	Adss	10090.ENSMUSP00000029405	10090.ENSMUSP00000016105	0.493	0	0.322	0	0.437	0	0	0.595	0.911	>node 1 information	Gmps	ENSMUSG00000027823	30.2407	41.7003	35.9705	0.318583	0.871	0.277486	-1.37895	Down	MGI:2448526				>node 2 information	Adss	ENSMUSG00000015961	43.4678	60.8084	52.1381	0.33259	0.946	0.31463	-1.39893	Down	MGI:87948
>interaction	Elavl2	Hnrnph1	10090.ENSMUSP00000099863	10090.ENSMUSP00000070503	0	0	0	0	0.053	0.047	0.9	0.131	0.911	>node 1 information	Elavl2	ENSMUSG00000008489	17.0204	26.6068	21.8136	0.439469	0.73	0.320812	-1.56323	Down	MGI:1100887				>node 2 information	Hnrnph1	ENSMUSG00000007850	59.2193	84.1137	71.6665	0.347365	0.98	0.340417	-1.42038	Down	MGI:1891925
>interaction	Srsf2	Phf5a	10090.ENSMUSP00000090059	10090.ENSMUSP00000023117	0	0	0	0	0.112	0	0.9	0.077	0.911	>node 1 information	Srsf2	ENSMUSG00000034120	58.934	85.9297	72.4318	0.372705	0.981	0.365623	-1.45807	Down	MGI:98284				>node 2 information	Phf5a	ENSMUSG00000061360	48.8673	67.1986	58.0329	0.315877	0.961	0.303558	-1.37512	Down	MGI:2156864
>interaction	Pik3c2a	Plcg2	10090.ENSMUSP00000126092	10090.ENSMUSP00000079991	0	0	0	0	0.067	0.115	0.9	0.055	0.911	>node 1 information	Pik3c2a	ENSMUSG00000030660	12.3005	21.456	16.8783	0.542444	0.657	0.356385	-1.74432	Down	MGI:1203729				>node 2 information	Plcg2	ENSMUSG00000034330	26.3701	15.5815	20.9758	0.514336	0.718	0.369293	1.6924	Up	MGI:97616	cell differentiation
>interaction	Actr3	M6pr	10090.ENSMUSP00000027579	10090.ENSMUSP00000007602	0	0	0	0	0.151	0	0.9	0	0.911	>node 1 information	Actr3	ENSMUSG00000026341	31.0107	50.3094	40.66	0.474635	0.899	0.426697	-1.62232	Down	MGI:1921367	cell differentiation			>node 2 information	M6pr	ENSMUSG00000007458	16.8481	34.6051	25.7266	0.690219	0.777	0.536301	-2.05395	Down	MGI:96904
>interaction	Pde6b	Hprt	10090.ENSMUSP00000031456	10090.ENSMUSP00000026723	0	0	0	0	0	0	0.9	0.156	0.911	>node 1 information	Pde6b	ENSMUSG00000029491	1.94262	0.344584	1.1436	1.39737	0.252	0.352137	5.63758	Up	MGI:97525				>node 2 information	Hprt	ENSMUSG00000025630	29.9106	41.64	35.7753	0.327863	0.87	0.285241	-1.39215	Down	MGI:96217	cell proliferation;cell differentiation
>interaction	Chst12	Bgn	10090.ENSMUSP00000041663	10090.ENSMUSP00000033741	0	0	0	0	0	0	0.9	0.156	0.911	>node 1 information	Chst12	ENSMUSG00000036599	24.1981	13.7927	18.9954	0.547785	0.688	0.376876	1.75441	Up	MGI:1929064				>node 2 information	Bgn	ENSMUSG00000031375	5.10903	2.21682	3.66292	0.78959	0.364	0.287411	2.30467	Up	MGI:88158
>interaction	Cul3	Psma6	10090.ENSMUSP00000130738	10090.ENSMUSP00000021412	0	0	0	0	0.103	0.08	0.9	0.049	0.911	>node 1 information	Cul3	ENSMUSG00000004364	46.4411	68.4015	57.4213	0.382443	0.959	0.366763	-1.47287	Down	MGI:1347360	cell differentiation			>node 2 information	Psma6	ENSMUSG00000021024	49.725	69.4944	59.6097	0.331647	0.963	0.319376	-1.39757	Down	MGI:1347006
>interaction	Arih1	Flnb	10090.ENSMUSP00000126531	10090.ENSMUSP00000052020	0	0	0	0	0.12	0	0.9	0.071	0.911	>node 1 information	Arih1	ENSMUSG00000025234	34.6992	50.549	42.6241	0.371851	0.909	0.338012	-1.45678	Down	MGI:1344363				>node 2 information	Flnb	ENSMUSG00000025278	21.4391	12.8181	17.1286	0.50331	0.66	0.332185	1.67256	Up	MGI:2446089	cell differentiation
>interaction	Rab11a	Nde1	10090.ENSMUSP00000129163	10090.ENSMUSP00000023359	0	0	0	0	0	0.062	0.9	0.129	0.911	>node 1 information	Rab11a	ENSMUSG00000004771	33.5683	56.4305	44.9994	0.508056	0.92	0.467411	-1.68107	Down	MGI:1858202	cell differentiation			>node 2 information	Nde1	ENSMUSG00000022678	31.929	21.2906	26.6098	0.399793	0.786	0.314237	1.49968	Up	MGI:1914453	cell proliferation;cell differentiation
>interaction	Hist1h2aa	Kdm1b	10090.ENSMUSP00000072227	10090.ENSMUSP00000038373	0	0	0	0	0	0	0.9	0.153	0.911	>node 1 information	Hist1h2aa	ENSMUSG00000060081	0.22077	1.48228	0.851525	1.48147	0.226	0.334813	-6.71414	Down	MGI:2448285				>node 2 information	Kdm1b	ENSMUSG00000038080	21.2789	36.8917	29.0853	0.536794	0.811	0.43534	-1.73372	Down	MGI:2145261
>interaction	Smek1	Smek2	10090.ENSMUSP00000129654	10090.ENSMUSP00000020755	0	0	0	0.98	0.139	0	0.9	0.811	0.911	>node 1 information	Smek1	ENSMUSG00000041846	28.5846	41.0383	34.8115	0.357747	0.862	0.308378	-1.43568	Down	MGI:1915984				>node 2 information	Smek2	ENSMUSG00000020463	33.8886	53.3522	43.6204	0.446204	0.914	0.407831	-1.57434	Down	MGI:2144474
>interaction	Skp1a	Wsb1	10090.ENSMUSP00000038744	10090.ENSMUSP00000017821	0	0	0	0	0.067	0	0.9	0.122	0.91	>node 1 information	Skp1a	ENSMUSG00000036309	50.0088	80.2426	65.1257	0.464238	0.972	0.451239	-1.60457	Down	MGI:103575				>node 2 information	Wsb1	ENSMUSG00000017677	35.5432	50.3479	42.9455	0.344732	0.911	0.314051	-1.41653	Down	MGI:1926139
>interaction	Ncor2	Med13	10090.ENSMUSP00000083250	10090.ENSMUSP00000044268	0	0	0	0	0.115	0	0.9	0.067	0.91	>node 1 information	Ncor2	ENSMUSG00000029478	77.2072	56.488	66.8476	0.309947	0.974	0.301888	1.36679	Up	MGI:1337080	cell proliferation;cell differentiation			>node 2 information	Med13	ENSMUSG00000034297	21.4982	31.1558	26.327	0.366833	0.783	0.28723	-1.44923	Down	MGI:3029632
>interaction	Iqcb1	Pafah1b1	10090.ENSMUSP00000023535	10090.ENSMUSP00000021091	0	0	0	0	0.072	0.062	0.9	0.092	0.91	>node 1 information	Iqcb1	ENSMUSG00000022837	19.621	31.442	25.5315	0.462997	0.775	0.358822	-1.60247	Down	MGI:2443764	cell differentiation			>node 2 information	Pafah1b1	ENSMUSG00000020745	37.7155	55.4333	46.5744	0.380419	0.928	0.353029	-1.46978	Down	MGI:109520	cell proliferation;cell differentiation	abnormal male fertility
>interaction	Pde6b	Gmpr	10090.ENSMUSP00000031456	10090.ENSMUSP00000000260	0	0	0	0	0	0.139	0.9	0	0.91	>node 1 information	Pde6b	ENSMUSG00000029491	1.94262	0.344584	1.1436	1.39737	0.252	0.352137	5.63758	Up	MGI:97525				>node 2 information	Gmpr	ENSMUSG00000000253	18.397	11.1919	14.7944	0.487014	0.622	0.302923	1.64378	Up	MGI:1913605
>interaction	Hist1h3e	Hist1h2af	10090.ENSMUSP00000100739	10090.ENSMUSP00000072989	0	0	0	0	0.692	0.41	0	0.544	0.91	>node 1 information	Hist1h3e	ENSMUSG00000069273	2.38594	0.341943	1.36394	1.4986	0.266	0.398626	6.9776	Up	MGI:2448326				>node 2 information	Hist1h2af	ENSMUSG00000061991	3.23177	0.591375	1.91157	1.38127	0.297	0.410237	5.46484	Up	MGI:2448309
>interaction	Srsf5	Thoc2	10090.ENSMUSP00000105981	10090.ENSMUSP00000044677	0	0	0	0	0.053	0	0.9	0.127	0.91	>node 1 information	Srsf5	ENSMUSG00000021134	20.2171	30.6718	25.4444	0.410883	0.774	0.318024	-1.51712	Down	MGI:98287				>node 2 information	Thoc2	ENSMUSG00000037475	14.1102	22.1095	18.1099	0.44171	0.674	0.297712	-1.56692	Down	MGI:2442413	cell differentiation
>interaction	Hist1h2af	Egr2	10090.ENSMUSP00000072989	10090.ENSMUSP00000041053	0	0	0	0	0.054	0.1	0.9	0.071	0.91	>node 1 information	Hist1h2af	ENSMUSG00000061991	3.23177	0.591375	1.91157	1.38127	0.297	0.410237	5.46484	Up	MGI:2448309				>node 2 information	Egr2	ENSMUSG00000037868	16.8282	8.77512	12.8017	0.629065	0.585	0.368003	1.91772	Up	MGI:95296	cell differentiation
>interaction	Srsf6	Thoc2	10090.ENSMUSP00000119065	10090.ENSMUSP00000044677	0	0	0	0	0.053	0	0.9	0.133	0.91	>node 1 information	Srsf6	ENSMUSG00000016921	38.555	52.7262	45.6406	0.310495	0.923	0.286587	-1.36756	Down	MGI:1915246	cell proliferation;cell differentiation			>node 2 information	Thoc2	ENSMUSG00000037475	14.1102	22.1095	18.1099	0.44171	0.674	0.297712	-1.56692	Down	MGI:2442413	cell differentiation
>interaction	Egr2	Nab2	10090.ENSMUSP00000041053	10090.ENSMUSP00000026469	0	0	0	0	0.127	0.57	0	0.78	0.91	>node 1 information	Egr2	ENSMUSG00000037868	16.8282	8.77512	12.8017	0.629065	0.585	0.368003	1.91772	Up	MGI:95296	cell differentiation			>node 2 information	Nab2	ENSMUSG00000025402	39.0753	26.4781	32.7767	0.384334	0.845	0.324762	1.47576	Up	MGI:107563	cell differentiation
>interaction	Arl1	Gcc1	10090.ENSMUSP00000111942	10090.ENSMUSP00000067395	0	0	0	0	0.051	0.107	0.9	0.064	0.91	>node 1 information	Arl1	ENSMUSG00000060904	45.25	63.14	54.195	0.330104	0.952	0.314259	-1.39536	Down	MGI:99436				>node 2 information	Gcc1	ENSMUSG00000029708	8.87331	16.699	12.7862	0.612044	0.585	0.358046	-1.88194	Down	MGI:1921625
>interaction	Srsf7	Phf5a	10090.ENSMUSP00000070983	10090.ENSMUSP00000023117	0	0	0	0	0.127	0	0.9	0	0.909	>node 1 information	Srsf7	ENSMUSG00000024097	37.097	50.8106	43.9538	0.312	0.916	0.285792	-1.36967	Down	MGI:1926232				>node 2 information	Phf5a	ENSMUSG00000061360	48.8673	67.1986	58.0329	0.315877	0.961	0.303558	-1.37512	Down	MGI:2156864
>interaction	Srsf2	Nudt21	10090.ENSMUSP00000090059	10090.ENSMUSP00000034204	0	0	0	0	0.128	0	0.9	0	0.909	>node 1 information	Srsf2	ENSMUSG00000034120	58.934	85.9297	72.4318	0.372705	0.981	0.365623	-1.45807	Down	MGI:98284				>node 2 information	Nudt21	ENSMUSG00000031754	3.47487	8.94399	6.20943	0.880776	0.434	0.382257	-2.57391	Down	MGI:1915469
>interaction	Vamp3	Actr3	10090.ENSMUSP00000030797	10090.ENSMUSP00000027579	0	0	0	0	0.05	0.097	0.9	0.065	0.909	>node 1 information	Vamp3	ENSMUSG00000028955	26.1553	43.0929	34.6241	0.489185	0.86	0.420699	-1.64758	Down	MGI:1321389	cell differentiation			>node 2 information	Actr3	ENSMUSG00000026341	31.0107	50.3094	40.66	0.474635	0.899	0.426697	-1.62232	Down	MGI:1921367	cell differentiation
>interaction	Cdk5r2	Cdk14	10090.ENSMUSP00000125322	10090.ENSMUSP00000030763	0	0	0	0	0.081	0.722	0.371	0.502	0.909	>node 1 information	Cdk5r2	ENSMUSG00000090071	1.54271	0.389341	0.966025	1.19393	0.237	0.282962	3.96236	Up	MGI:1330828	cell differentiation			>node 2 information	Cdk14	ENSMUSG00000028926	13.3817	8.02872	10.7052	0.500035	0.541	0.270519	1.66673	Up	MGI:894318
>interaction	Cenpk	Xpo1	10090.ENSMUSP00000022227	10090.ENSMUSP00000020538	0	0	0	0	0.133	0	0.9	0	0.909	>node 1 information	Cenpk	ENSMUSG00000021714	9.95195	16.0237	12.9878	0.467496	0.588	0.274887	-1.61011	Down	MGI:1926210				>node 2 information	Xpo1	ENSMUSG00000020290	43.3663	69.5431	56.4547	0.463678	0.957	0.44374	-1.60362	Down	MGI:2144013
>interaction	Ethe1	Mpst	10090.ENSMUSP00000076433	10090.ENSMUSP00000043061	0.051	0	0	0	0.077	0	0.9	0.089	0.909	>node 1 information	Ethe1	ENSMUSG00000064254	11.2712	5.8234	8.5473	0.637371	0.49	0.312312	1.9355	Up	MGI:1913321				>node 2 information	Mpst	ENSMUSG00000071711	23.8163	37.2155	30.5159	0.439089	0.825	0.362249	-1.56261	Down	MGI:2179733		abnormal male fertility
>interaction	Xpo1	Taok1	10090.ENSMUSP00000020538	10090.ENSMUSP00000017435	0	0	0	0	0.13	0	0.9	0	0.909	>node 1 information	Xpo1	ENSMUSG00000020290	43.3663	69.5431	56.4547	0.463678	0.957	0.44374	-1.60362	Down	MGI:2144013				>node 2 information	Taok1	ENSMUSG00000017291	17.0409	26.5511	21.796	0.436328	0.729	0.318083	-1.55808	Down	MGI:1914490
>interaction	Col13a1	Col6a1	10090.ENSMUSP00000101094	10090.ENSMUSP00000001147	0	0	0	0.627	0	0	0.9	0.298	0.909	>node 1 information	Col13a1	ENSMUSG00000058806	4.2817	1.52327	2.90248	0.950368	0.338	0.321225	2.81086	Up	MGI:1277201	cell differentiation			>node 2 information	Col6a1	ENSMUSG00000001119	9.71911	2.2577	5.98841	1.24598	0.428	0.533278	4.30487	Up	MGI:88459
>interaction	Gpcpd1	Etnk1	10090.ENSMUSP00000062221	10090.ENSMUSP00000032413	0	0	0	0	0.074	0	0.9	0.098	0.909	>node 1 information	Gpcpd1	ENSMUSG00000027346	14.2428	21.464	17.8534	0.404472	0.671	0.271401	-1.50701	Down	MGI:104898				>node 2 information	Etnk1	ENSMUSG00000030275	22.308	34.8905	28.5992	0.43996	0.807	0.355048	-1.56404	Down	MGI:1922570
>interaction	Prdm9	Hist1h2af	10090.ENSMUSP00000131871	10090.ENSMUSP00000072989	0	0	0	0	0.054	0.1	0.9	0.065	0.909	>node 1 information	Prdm9	ENSMUSG00000051977	3.36077	9.83054	6.59565	0.980914	0.444	0.435526	-2.92509	Down	MGI:2384854		abnormal male fertility		>node 2 information	Hist1h2af	ENSMUSG00000061991	3.23177	0.591375	1.91157	1.38127	0.297	0.410237	5.46484	Up	MGI:2448309
>interaction	Tubg2	Nde1	10090.ENSMUSP00000045901	10090.ENSMUSP00000023359	0	0	0	0	0	0.107	0.9	0.064	0.909	>node 1 information	Tubg2	ENSMUSG00000045007	8.58332	3.79528	6.1893	0.7736	0.433	0.334969	2.26158	Up	MGI:2144208				>node 2 information	Nde1	ENSMUSG00000022678	31.929	21.2906	26.6098	0.399793	0.786	0.314237	1.49968	Up	MGI:1914453	cell proliferation;cell differentiation
>interaction	Ethe1	Tst	10090.ENSMUSP00000076433	10090.ENSMUSP00000055743	0.051	0	0	0	0.094	0	0.9	0.06	0.908	>node 1 information	Ethe1	ENSMUSG00000064254	11.2712	5.8234	8.5473	0.637371	0.49	0.312312	1.9355	Up	MGI:1913321				>node 2 information	Tst	ENSMUSG00000044986	33.0731	20.0144	26.5437	0.491969	0.786	0.386688	1.65247	Up	MGI:98852	cell differentiation
>interaction	Vnn1	Pank3	10090.ENSMUSP00000040599	10090.ENSMUSP00000018990	0	0	0	0	0.085	0	0.9	0.077	0.908	>node 1 information	Vnn1	ENSMUSG00000037440	5.11479	2.30428	3.70953	0.757645	0.366	0.277298	2.21969	Up	MGI:108395	cell differentiation			>node 2 information	Pank3	ENSMUSG00000018846	17.2266	32.3919	24.8092	0.611276	0.768	0.46946	-1.88034	Down	MGI:2387464
>interaction	Hist1h3e	Hist1h2aa	10090.ENSMUSP00000100739	10090.ENSMUSP00000072227	0	0	0	0	0.671	0.41	0	0.566	0.908	>node 1 information	Hist1h3e	ENSMUSG00000069273	2.38594	0.341943	1.36394	1.4986	0.266	0.398626	6.9776	Up	MGI:2448326				>node 2 information	Hist1h2aa	ENSMUSG00000060081	0.22077	1.48228	0.851525	1.48147	0.226	0.334813	-6.71414	Down	MGI:2448285
>interaction	Srsf6	Elavl2	10090.ENSMUSP00000119065	10090.ENSMUSP00000099863	0	0	0	0	0.054	0.109	0.9	0.043	0.908	>node 1 information	Srsf6	ENSMUSG00000016921	38.555	52.7262	45.6406	0.310495	0.923	0.286587	-1.36756	Down	MGI:1915246	cell proliferation;cell differentiation			>node 2 information	Elavl2	ENSMUSG00000008489	17.0204	26.6068	21.8136	0.439469	0.73	0.320812	-1.56323	Down	MGI:1100887
>interaction	Srsf5	Nudt21	10090.ENSMUSP00000105981	10090.ENSMUSP00000034204	0	0	0	0	0.052	0.1	0.9	0.051	0.908	>node 1 information	Srsf5	ENSMUSG00000021134	20.2171	30.6718	25.4444	0.410883	0.774	0.318024	-1.51712	Down	MGI:98287				>node 2 information	Nudt21	ENSMUSG00000031754	3.47487	8.94399	6.20943	0.880776	0.434	0.382257	-2.57391	Down	MGI:1915469
>interaction	Ndufaf3	Ndufc1	10090.ENSMUSP00000073832	10090.ENSMUSP00000038463	0	0	0	0	0.122	0	0.9	0	0.908	>node 1 information	Ndufaf3	ENSMUSG00000070283	1.95761	6.09648	4.02705	1.02777	0.375	0.385413	-3.11425	Down	MGI:1913956				>node 2 information	Ndufc1	ENSMUSG00000037152	13.8353	23.2951	18.5652	0.509545	0.681	0.347	-1.68374	Down	MGI:1913627
>interaction	Srsf2	Snrpd2	10090.ENSMUSP00000090059	10090.ENSMUSP00000037597	0	0	0	0	0.078	0	0.9	0.083	0.908	>node 1 information	Srsf2	ENSMUSG00000034120	58.934	85.9297	72.4318	0.372705	0.981	0.365623	-1.45807	Down	MGI:98284				>node 2 information	Snrpd2	ENSMUSG00000040824	48.1126	97.5585	72.8355	0.67887	0.981	0.665972	-2.02771	Down	MGI:98345
>interaction	Mcm9	Tipin	10090.ENSMUSP00000074978	10090.ENSMUSP00000034964	0	0	0	0	0.223	0.805	0	0.444	0.908	>node 1 information	Mcm9	ENSMUSG00000058298	11.5128	4.25857	7.88568	0.919924	0.476	0.437884	2.70344	Up	MGI:1918817				>node 2 information	Tipin	ENSMUSG00000032397	48.695	79.1464	63.9207	0.476393	0.969	0.461625	-1.62535	Down	MGI:1921571	cell proliferation
>interaction	Anapc10	Psmd6	10090.ENSMUSP00000048244	10090.ENSMUSP00000022256	0	0	0	0	0.121	0	0.9	0	0.908	>node 1 information	Anapc10	ENSMUSG00000036977	9.24782	16.1556	12.7017	0.543846	0.583	0.317062	-1.74696	Down	MGI:1916249				>node 2 information	Psmd6	ENSMUSG00000021737	40.3639	54.0615	47.2127	0.290125	0.93	0.269817	-1.33935	Down	MGI:1913663
>interaction	Atr	Sycp3	10090.ENSMUSP00000034980	10090.ENSMUSP00000020252	0	0	0	0	0.075	0	0.9	0.085	0.908	>node 1 information	Atr	ENSMUSG00000032409	23.1463	41.1559	32.1511	0.560155	0.84	0.47053	-1.77808	Down	MGI:108028				>node 2 information	Sycp3	ENSMUSG00000020059	24.6262	56.2319	40.429	0.781757	0.898	0.702018	-2.28342	Down	MGI:109542	cell differentiation	abnormal male fertility
>interaction	H2-T23	Vamp3	10090.ENSMUSP00000099739	10090.ENSMUSP00000030797	0	0	0	0	0	0	0.9	0.127	0.908	>node 1 information	H2-T23	ENSMUSG00000067212	0.189335	1.37218	0.780757	1.515	0.219	0.331784	-7.24737	Down	MGI:95957	cell proliferation			>node 2 information	Vamp3	ENSMUSG00000028955	26.1553	43.0929	34.6241	0.489185	0.86	0.420699	-1.64758	Down	MGI:1321389	cell differentiation
>interaction	Ccne2	Psma6	10090.ENSMUSP00000103960	10090.ENSMUSP00000021412	0	0	0	0	0	0.105	0.9	0.056	0.908	>node 1 information	Ccne2	ENSMUSG00000028212	9.17713	18.8589	14.018	0.690666	0.609	0.420616	-2.05499	Down	MGI:1329034		abnormal male fertility;abnormal spermatogenesis		>node 2 information	Psma6	ENSMUSG00000021024	49.725	69.4944	59.6097	0.331647	0.963	0.319376	-1.39757	Down	MGI:1347006
>interaction	Cacnb1	Cacnb3	10090.ENSMUSP00000017552	10090.ENSMUSP00000003442	0	0	0	0.962	0.114	0	0.9	0.337	0.908	>node 1 information	Cacnb1	ENSMUSG00000020882	1.73029	9.5573	5.64379	1.38683	0.42	0.582471	-5.52352	Down	MGI:102522				>node 2 information	Cacnb3	ENSMUSG00000003352	25.5705	17.2348	21.4027	0.38947	0.724	0.281977	1.48366	Up	MGI:103307
>interaction	Gpr45	Lhcgr	10090.ENSMUSP00000110409	10090.ENSMUSP00000024916	0	0	0	0	0.112	0	0.9	0.053	0.908	>node 1 information	Gpr45	ENSMUSG00000041907	2.82254	0.699284	1.76091	1.20577	0.288	0.347262	4.03633	Up	MGI:2135882				>node 2 information	Lhcgr	ENSMUSG00000024107	3.84609	0.8625	2.3543	1.2673	0.317	0.401733	4.45923	Up	MGI:96783	cell differentiation	abnormal male fertility
>interaction	Srsf3	Elavl2	10090.ENSMUSP00000117045	10090.ENSMUSP00000099863	0	0	0	0	0.044	0.114	0.9	0	0.907	>node 1 information	Srsf3	ENSMUSG00000071172	29.2949	42.2882	35.7916	0.363027	0.871	0.316197	-1.44353	Down	MGI:98285				>node 2 information	Elavl2	ENSMUSG00000008489	17.0204	26.6068	21.8136	0.439469	0.73	0.320812	-1.56323	Down	MGI:1100887
>interaction	Mnat1	Ercc1	10090.ENSMUSP00000021523	10090.ENSMUSP00000003645	0	0	0	0	0.053	0	0.9	0.104	0.907	>node 1 information	Mnat1	ENSMUSG00000021103	15.9166	6.77796	11.3473	0.80536	0.556	0.44778	2.34829	Up	MGI:106207	cell proliferation	abnormal spermatogenesis		>node 2 information	Ercc1	ENSMUSG00000003549	33.0386	22.7417	27.8901	0.369195	0.8	0.295356	1.45278	Up	MGI:95412	cell proliferation;cell differentiation	abnormal male fertility;abnormal spermatogenesis
>interaction	Ube2c	Psma6	10090.ENSMUSP00000085581	10090.ENSMUSP00000021412	0	0	0	0	0.11	0	0.9	0	0.907	>node 1 information	Ube2c	ENSMUSG00000001403	47.8028	33.7011	40.752	0.346037	0.9	0.311434	1.41843	Up	MGI:1915862				>node 2 information	Psma6	ENSMUSG00000021024	49.725	69.4944	59.6097	0.331647	0.963	0.319376	-1.39757	Down	MGI:1347006
>interaction	Nbas	Copb1	10090.ENSMUSP00000036082	10090.ENSMUSP00000033012	0	0	0	0	0.11	0	0.9	0	0.907	>node 1 information	Nbas	ENSMUSG00000020576	11.911	22.7241	17.3176	0.624401	0.664	0.414602	-1.90782	Down	MGI:1918419				>node 2 information	Copb1	ENSMUSG00000030754	31.331	43.654	37.4925	0.328679	0.88	0.289238	-1.39332	Down	MGI:1917599
>interaction	Anapc10	Psma6	10090.ENSMUSP00000048244	10090.ENSMUSP00000021412	0	0	0	0	0.114	0	0.9	0	0.907	>node 1 information	Anapc10	ENSMUSG00000036977	9.24782	16.1556	12.7017	0.543846	0.583	0.317062	-1.74696	Down	MGI:1916249				>node 2 information	Psma6	ENSMUSG00000021024	49.725	69.4944	59.6097	0.331647	0.963	0.319376	-1.39757	Down	MGI:1347006
>interaction	Fxyd1	Atp1b3	10090.ENSMUSP00000048460	10090.ENSMUSP00000034983	0	0	0	0	0	0.073	0.9	0.079	0.907	>node 1 information	Fxyd1	ENSMUSG00000036570	10.4663	3.31664	6.89147	1.03747	0.452	0.468934	3.15569	Up	MGI:1889273				>node 2 information	Atp1b3	ENSMUSG00000032412	43.4348	62.6335	53.0341	0.362006	0.948	0.343182	-1.44201	Down	MGI:107788
>interaction	Mcm9	Cdt1	10090.ENSMUSP00000074978	10090.ENSMUSP00000006760	0	0	0	0	0.225	0.414	0.39	0.704	0.907	>node 1 information	Mcm9	ENSMUSG00000058298	11.5128	4.25857	7.88568	0.919924	0.476	0.437884	2.70344	Up	MGI:1918817				>node 2 information	Cdt1	ENSMUSG00000006585	30.4764	21.5604	26.0184	0.342681	0.781	0.267634	1.41354	Up	MGI:1914427
>interaction	Ccne2	Mnat1	10090.ENSMUSP00000103960	10090.ENSMUSP00000021523	0	0	0	0	0.108	0	0.9	0	0.907	>node 1 information	Ccne2	ENSMUSG00000028212	9.17713	18.8589	14.018	0.690666	0.609	0.420616	-2.05499	Down	MGI:1329034		abnormal male fertility;abnormal spermatogenesis		>node 2 information	Mnat1	ENSMUSG00000021103	15.9166	6.77796	11.3473	0.80536	0.556	0.44778	2.34829	Up	MGI:106207	cell proliferation	abnormal spermatogenesis
>interaction	Actr3	Dvl2	10090.ENSMUSP00000027579	10090.ENSMUSP00000019362	0	0	0	0	0.051	0.088	0.9	0.058	0.907	>node 1 information	Actr3	ENSMUSG00000026341	31.0107	50.3094	40.66	0.474635	0.899	0.426697	-1.62232	Down	MGI:1921367	cell differentiation			>node 2 information	Dvl2	ENSMUSG00000020888	54.7571	39.3269	47.042	0.328009	0.93	0.305048	1.39236	Up	MGI:106613	cell proliferation
>interaction	Elavl2	Srsf7	10090.ENSMUSP00000099863	10090.ENSMUSP00000070983	0	0	0	0	0.046	0.11	0.9	0	0.907	>node 1 information	Elavl2	ENSMUSG00000008489	17.0204	26.6068	21.8136	0.439469	0.73	0.320812	-1.56323	Down	MGI:1100887				>node 2 information	Srsf7	ENSMUSG00000024097	37.097	50.8106	43.9538	0.312	0.916	0.285792	-1.36967	Down	MGI:1926232
>interaction	Rlim	Skp1a	10090.ENSMUSP00000070662	10090.ENSMUSP00000038744	0	0	0	0	0.051	0	0.9	0.103	0.907	>node 1 information	Rlim	ENSMUSG00000056537	18.0654	30.5123	24.2889	0.512453	0.761	0.389977	-1.68899	Down	MGI:1342291				>node 2 information	Skp1a	ENSMUSG00000036309	50.0088	80.2426	65.1257	0.464238	0.972	0.451239	-1.60457	Down	MGI:103575
>interaction	Srsf5	Elavl2	10090.ENSMUSP00000105981	10090.ENSMUSP00000099863	0	0	0	0	0	0.115	0.9	0.043	0.907	>node 1 information	Srsf5	ENSMUSG00000021134	20.2171	30.6718	25.4444	0.410883	0.774	0.318024	-1.51712	Down	MGI:98287				>node 2 information	Elavl2	ENSMUSG00000008489	17.0204	26.6068	21.8136	0.439469	0.73	0.320812	-1.56323	Down	MGI:1100887
>interaction	Hist1h3c	Hist1h2af	10090.ENSMUSP00000089346	10090.ENSMUSP00000072989	0	0	0	0	0.683	0.41	0	0.544	0.907	>node 1 information	Hist1h3c	ENSMUSG00000069310	2.0088	0.542508	1.27565	1.14944	0.26	0.298855	3.7028	Up	MGI:2448320				>node 2 information	Hist1h2af	ENSMUSG00000061991	3.23177	0.591375	1.91157	1.38127	0.297	0.410237	5.46484	Up	MGI:2448309
>interaction	Arpc3	M6pr	10090.ENSMUSP00000099584	10090.ENSMUSP00000007602	0	0	0	0	0.112	0	0.9	0	0.907	>node 1 information	Arpc3	ENSMUSG00000029465	57.8603	41.9539	49.9071	0.31872	0.939	0.299278	1.37914	Up	MGI:1928375				>node 2 information	M6pr	ENSMUSG00000007458	16.8481	34.6051	25.7266	0.690219	0.777	0.536301	-2.05395	Down	MGI:96904
>interaction	Nphp4	Tubg1	10090.ENSMUSP00000049920	10090.ENSMUSP00000048036	0	0	0	0	0.068	0.059	0.9	0.067	0.907	>node 1 information	Nphp4	ENSMUSG00000039577	15.0623	9.15151	12.1069	0.488216	0.572	0.27926	1.64588	Up	MGI:2384210	cell differentiation	abnormal male fertility		>node 2 information	Tubg1	ENSMUSG00000035198	60.2912	42.6845	51.4879	0.341958	0.945	0.323151	1.41248	Up	MGI:101834
>interaction	Ppp1cc	Nde1	10090.ENSMUSP00000099587	10090.ENSMUSP00000023359	0	0	0	0	0.101	0	0.9	0.05	0.907	>node 1 information	Ppp1cc	ENSMUSG00000004455	31.299	43.4603	37.3796	0.325345	0.88	0.286304	-1.38855	Down	MGI:104872	cell differentiation	abnormal male fertility		>node 2 information	Nde1	ENSMUSG00000022678	31.929	21.2906	26.6098	0.399793	0.786	0.314237	1.49968	Up	MGI:1914453	cell proliferation;cell differentiation
>interaction	Pafah1b1	Xpo1	10090.ENSMUSP00000021091	10090.ENSMUSP00000020538	0	0	0	0	0.106	0	0.9	0.044	0.907	>node 1 information	Pafah1b1	ENSMUSG00000020745	37.7155	55.4333	46.5744	0.380419	0.928	0.353029	-1.46978	Down	MGI:109520	cell proliferation;cell differentiation	abnormal male fertility		>node 2 information	Xpo1	ENSMUSG00000020290	43.3663	69.5431	56.4547	0.463678	0.957	0.44374	-1.60362	Down	MGI:2144013
>interaction	Ssb	Nop58	10090.ENSMUSP00000088365	10090.ENSMUSP00000027174	0	0	0	0	0.884	0.112	0	0.168	0.907	>node 1 information	Ssb	ENSMUSG00000068882	48.4089	70.3089	59.3589	0.368942	0.963	0.355291	-1.4524	Down	MGI:98423				>node 2 information	Nop58	ENSMUSG00000026020	38.1776	55.3223	46.7499	0.366732	0.929	0.340694	-1.44908	Down	MGI:1933184
>interaction	Csnk1e	Pafah1b1	10090.ENSMUSP00000113341	10090.ENSMUSP00000021091	0	0	0	0	0.06	0.044	0.9	0.09	0.907	>node 1 information	Csnk1e	ENSMUSG00000022433	60.3353	41.6457	50.9905	0.366531	0.943	0.345639	1.44878	Up	MGI:1351660				>node 2 information	Pafah1b1	ENSMUSG00000020745	37.7155	55.4333	46.5744	0.380419	0.928	0.353029	-1.46978	Down	MGI:109520	cell proliferation;cell differentiation	abnormal male fertility
>interaction	Jun	Dusp1	10090.ENSMUSP00000054270	10090.ENSMUSP00000025025	0	0	0	0	0.433	0.111	0.528	0.656	0.907	>node 1 information	Jun	ENSMUSG00000052684	51.1912	37.6828	44.437	0.30399	0.917	0.278759	1.35848	Up	MGI:96646	cell proliferation;cell differentiation			>node 2 information	Dusp1	ENSMUSG00000024190	14.3345	7.7548	11.0447	0.595736	0.549	0.327059	1.84847	Up	MGI:105120
>interaction	Whsc1	Pias4	10090.ENSMUSP00000067205	10090.ENSMUSP00000005064	0	0	0	0	0.077	0.048	0.9	0.067	0.907	>node 1 information	Whsc1	ENSMUSG00000057406	39.9641	53.9905	46.9773	0.298578	0.93	0.277678	-1.35098	Down	MGI:1276574				>node 2 information	Pias4	ENSMUSG00000004934	57.8228	41.5405	49.6816	0.327733	0.939	0.307741	1.39196	Up	MGI:2136940
>interaction	Ube2c	Psmd6	10090.ENSMUSP00000085581	10090.ENSMUSP00000022256	0	0	0	0	0.109	0	0.9	0	0.907	>node 1 information	Ube2c	ENSMUSG00000001403	47.8028	33.7011	40.752	0.346037	0.9	0.311434	1.41843	Up	MGI:1915862				>node 2 information	Psmd6	ENSMUSG00000021737	40.3639	54.0615	47.2127	0.290125	0.93	0.269817	-1.33935	Down	MGI:1913663
>interaction	Iqcb1	Cdk1	10090.ENSMUSP00000023535	10090.ENSMUSP00000020099	0	0	0	0	0.052	0.063	0.9	0.083	0.907	>node 1 information	Iqcb1	ENSMUSG00000022837	19.621	31.442	25.5315	0.462997	0.775	0.358822	-1.60247	Down	MGI:2443764	cell differentiation			>node 2 information	Cdk1	ENSMUSG00000019942	57.6102	40.4389	49.0245	0.350259	0.936	0.327843	1.42462	Up	MGI:88351	cell proliferation;cell differentiation
>interaction	Utp18	C1d	10090.ENSMUSP00000068103	10090.ENSMUSP00000000594	0	0	0	0	0.101	0	0.9	0.051	0.907	>node 1 information	Utp18	ENSMUSG00000054079	19.3802	41.494	30.4371	0.726541	0.824	0.59867	-2.14105	Down	MGI:1923402				>node 2 information	C1d	ENSMUSG00000000581	6.17138	11.2441	8.70774	0.582553	0.494	0.287781	-1.82197	Down	MGI:1927354
>interaction	Ldha	Mpst	10090.ENSMUSP00000103267	10090.ENSMUSP00000043061	0	0	0	0	0.091	0	0.9	0.061	0.907	>node 1 information	Ldha	ENSMUSG00000063229	22.1962	14.0589	18.1275	0.448891	0.675	0.303002	1.5788	Up	MGI:96759				>node 2 information	Mpst	ENSMUSG00000071711	23.8163	37.2155	30.5159	0.439089	0.825	0.362249	-1.56261	Down	MGI:2179733		abnormal male fertility
>interaction	Ldha	Tst	10090.ENSMUSP00000103267	10090.ENSMUSP00000055743	0	0	0	0	0.091	0	0.9	0.059	0.906	>node 1 information	Ldha	ENSMUSG00000063229	22.1962	14.0589	18.1275	0.448891	0.675	0.303002	1.5788	Up	MGI:96759				>node 2 information	Tst	ENSMUSG00000044986	33.0731	20.0144	26.5437	0.491969	0.786	0.386688	1.65247	Up	MGI:98852	cell differentiation
>interaction	Exosc3	Rpl19	10090.ENSMUSP00000030003	10090.ENSMUSP00000017548	0	0	0	0	0.089	0	0.9	0.055	0.906	>node 1 information	Exosc3	ENSMUSG00000028322	23.8198	38.9875	31.4036	0.482992	0.834	0.402815	-1.63677	Down	MGI:1913612				>node 2 information	Rpl19	ENSMUSG00000017404	16.2771	4.48338	10.3802	1.13617	0.534	0.606715	3.63054	Up	MGI:98020
>interaction	Rlim	Wsb1	10090.ENSMUSP00000070662	10090.ENSMUSP00000017821	0	0	0	0	0.098	0	0.9	0	0.906	>node 1 information	Rlim	ENSMUSG00000056537	18.0654	30.5123	24.2889	0.512453	0.761	0.389977	-1.68899	Down	MGI:1342291				>node 2 information	Wsb1	ENSMUSG00000017677	35.5432	50.3479	42.9455	0.344732	0.911	0.314051	-1.41653	Down	MGI:1926139
>interaction	Hnrnph1	Snrpd2	10090.ENSMUSP00000070503	10090.ENSMUSP00000037597	0	0	0	0	0.054	0.047	0.9	0.082	0.906	>node 1 information	Hnrnph1	ENSMUSG00000007850	59.2193	84.1137	71.6665	0.347365	0.98	0.340417	-1.42038	Down	MGI:1891925				>node 2 information	Snrpd2	ENSMUSG00000040824	48.1126	97.5585	72.8355	0.67887	0.981	0.665972	-2.02771	Down	MGI:98345
>interaction	Rab11a	Nphp4	10090.ENSMUSP00000129163	10090.ENSMUSP00000049920	0	0	0	0	0	0	0.9	0.105	0.906	>node 1 information	Rab11a	ENSMUSG00000004771	33.5683	56.4305	44.9994	0.508056	0.92	0.467411	-1.68107	Down	MGI:1858202	cell differentiation			>node 2 information	Nphp4	ENSMUSG00000039577	15.0623	9.15151	12.1069	0.488216	0.572	0.27926	1.64588	Up	MGI:2384210	cell differentiation	abnormal male fertility
>interaction	Actr3	Bin1	10090.ENSMUSP00000027579	10090.ENSMUSP00000025239	0	0	0	0	0.047	0.073	0.9	0.064	0.906	>node 1 information	Actr3	ENSMUSG00000026341	31.0107	50.3094	40.66	0.474635	0.899	0.426697	-1.62232	Down	MGI:1921367	cell differentiation			>node 2 information	Bin1	ENSMUSG00000024381	19.4043	10.6341	15.0192	0.583933	0.628	0.36671	1.82472	Up	MGI:108092	cell differentiation
>interaction	Fbxl5	Wsb1	10090.ENSMUSP00000045792	10090.ENSMUSP00000017821	0	0	0	0	0.098	0	0.9	0	0.906	>node 1 information	Fbxl5	ENSMUSG00000039753	34.0093	48.3285	41.1689	0.347816	0.902	0.31373	-1.42104	Down	MGI:2152883				>node 2 information	Wsb1	ENSMUSG00000017677	35.5432	50.3479	42.9455	0.344732	0.911	0.314051	-1.41653	Down	MGI:1926139
>interaction	Tmsb4x	Pf4	10090.ENSMUSP00000107795	10090.ENSMUSP00000031320	0	0	0	0	0	0	0.9	0.099	0.906	>node 1 information	Tmsb4x	ENSMUSG00000049775	52.1334	91.3732	71.7533	0.546871	0.98	0.535934	-1.75268	Down	MGI:99510	cell differentiation			>node 2 information	Pf4	ENSMUSG00000029373	5.26837	1.96588	3.61713	0.913015	0.362	0.330511	2.6799	Up	MGI:1888711	cell proliferation;cell differentiation
>interaction	Lpar3	Cxcl1	10090.ENSMUSP00000037712	10090.ENSMUSP00000031327	0	0	0	0	0	0	0.9	0.099	0.906	>node 1 information	Lpar3	ENSMUSG00000036832	16.1782	34.0462	25.1122	0.711527	0.771	0.548587	-2.10445	Down	MGI:1929469	cell differentiation			>node 2 information	Cxcl1	ENSMUSG00000029380	1.1573	0.0785125	0.617906	1.74588	0.199	0.347429	14.7403	Up	MGI:108068	cell proliferation
>interaction	Ddb2	Cops5	10090.ENSMUSP00000028696	10090.ENSMUSP00000027050	0	0	0	0	0.05	0	0.9	0.091	0.906	>node 1 information	Ddb2	ENSMUSG00000002109	8.51632	14.176	11.3462	0.498819	0.556	0.277343	-1.66457	Down	MGI:1355314				>node 2 information	Cops5	ENSMUSG00000025917	26.1005	36.3417	31.2211	0.328022	0.832	0.272914	-1.39238	Down	MGI:1349415
>interaction	Rab18	Pafah1b1	10090.ENSMUSP00000095285	10090.ENSMUSP00000021091	0	0	0	0	0.093	0	0.9	0.047	0.906	>node 1 information	Rab18	ENSMUSG00000073639	32.71	50.8712	41.7906	0.434576	0.905	0.393291	-1.55522	Down	MGI:102790				>node 2 information	Pafah1b1	ENSMUSG00000020745	37.7155	55.4333	46.5744	0.380419	0.928	0.353029	-1.46978	Down	MGI:109520	cell proliferation;cell differentiation	abnormal male fertility
>interaction	Cxcl1	Pf4	10090.ENSMUSP00000031327	10090.ENSMUSP00000031320	0	0	0	0.894	0	0	0.9	0.516	0.905	>node 1 information	Cxcl1	ENSMUSG00000029380	1.1573	0.0785125	0.617906	1.74588	0.199	0.347429	14.7403	Up	MGI:108068	cell proliferation			>node 2 information	Pf4	ENSMUSG00000029373	5.26837	1.96588	3.61713	0.913015	0.362	0.330511	2.6799	Up	MGI:1888711	cell proliferation;cell differentiation
>interaction	Serping1	Actn1	10090.ENSMUSP00000023994	10090.ENSMUSP00000021554	0	0	0	0	0.076	0.064	0.9	0	0.905	>node 1 information	Serping1	ENSMUSG00000023224	2.76028	0.941322	1.8508	0.982795	0.294	0.288942	2.93234	Up	MGI:894696				>node 2 information	Actn1	ENSMUSG00000015143	14.1553	7.81392	10.9846	0.577297	0.547	0.315781	1.81155	Up	MGI:2137706	cell differentiation
>interaction	Arpc5	M6pr	10090.ENSMUSP00000076933	10090.ENSMUSP00000007602	0	0	0	0	0.09	0	0.9	0	0.905	>node 1 information	Arpc5	ENSMUSG00000008475	22.2541	35.4329	28.8435	0.456908	0.809	0.369639	-1.5922	Down	MGI:1915021				>node 2 information	M6pr	ENSMUSG00000007458	16.8481	34.6051	25.7266	0.690219	0.777	0.536301	-2.05395	Down	MGI:96904
>interaction	Nt5c3	Adss	10090.ENSMUSP00000031793	10090.ENSMUSP00000016105	0	0	0	0	0.054	0	0.9	0.082	0.905	>node 1 information	Nt5c3	ENSMUSG00000029780	26.1975	39.1759	32.6867	0.397054	0.844	0.335114	-1.49541	Down	MGI:1927186				>node 2 information	Adss	ENSMUSG00000015961	43.4678	60.8084	52.1381	0.33259	0.946	0.31463	-1.39893	Down	MGI:87948
>interaction	Gsta4	Adh1	10090.ENSMUSP00000034903	10090.ENSMUSP00000004232	0	0	0	0	0.042	0	0.9	0.094	0.905	>node 1 information	Gsta4	ENSMUSG00000032348	74.9758	99.7241	87.35	0.283324	0.99	0.28049	-1.33008	Down	MGI:1309515				>node 2 information	Adh1	ENSMUSG00000074207	28.7479	10.0193	19.3836	0.966209	0.695	0.671515	2.86925	Up	MGI:87921
>interaction	Nudt21	Phf5a	10090.ENSMUSP00000034204	10090.ENSMUSP00000023117	0	0	0	0	0.094	0	0.9	0	0.905	>node 1 information	Nudt21	ENSMUSG00000031754	3.47487	8.94399	6.20943	0.880776	0.434	0.382257	-2.57391	Down	MGI:1915469				>node 2 information	Phf5a	ENSMUSG00000061360	48.8673	67.1986	58.0329	0.315877	0.961	0.303558	-1.37512	Down	MGI:2156864
>interaction	Oxtr	Lpar3	10090.ENSMUSP00000051132	10090.ENSMUSP00000037712	0	0	0	0	0	0	0.9	0.097	0.905	>node 1 information	Oxtr	ENSMUSG00000049112	2.47201	0.865303	1.66866	0.962875	0.284	0.273456	2.85681	Up	MGI:109147				>node 2 information	Lpar3	ENSMUSG00000036832	16.1782	34.0462	25.1122	0.711527	0.771	0.548587	-2.10445	Down	MGI:1929469	cell differentiation
>interaction	Anapc10	Psmd14	10090.ENSMUSP00000048244	10090.ENSMUSP00000028278	0	0	0	0	0.096	0	0.9	0	0.905	>node 1 information	Anapc10	ENSMUSG00000036977	9.24782	16.1556	12.7017	0.543846	0.583	0.317062	-1.74696	Down	MGI:1916249				>node 2 information	Psmd14	ENSMUSG00000026914	35.7514	55.7193	45.7353	0.436597	0.924	0.403415	-1.55852	Down	MGI:1913284
>interaction	Eif5	Rpl19	10090.ENSMUSP00000061616	10090.ENSMUSP00000017548	0	0	0	0	0.089	0	0.9	0	0.905	>node 1 information	Eif5	ENSMUSG00000021282	38.5019	56.851	47.6765	0.384867	0.932	0.358696	-1.47658	Down	MGI:95309				>node 2 information	Rpl19	ENSMUSG00000017404	16.2771	4.48338	10.3802	1.13617	0.534	0.606715	3.63054	Up	MGI:98020
>interaction	Actr3	Tfrc	10090.ENSMUSP00000027579	10090.ENSMUSP00000023486	0	0	0	0	0.069	0	0.9	0.065	0.905	>node 1 information	Actr3	ENSMUSG00000026341	31.0107	50.3094	40.66	0.474635	0.899	0.426697	-1.62232	Down	MGI:1921367	cell differentiation			>node 2 information	Tfrc	ENSMUSG00000022797	25.1625	45.0408	35.1016	0.566307	0.865	0.489855	-1.79	Down	MGI:98822	cell proliferation;cell differentiation
>interaction	Arpc3	Picalm	10090.ENSMUSP00000099584	10090.ENSMUSP00000051092	0	0	0	0	0.081	0	0.9	0.058	0.905	>node 1 information	Arpc3	ENSMUSG00000029465	57.8603	41.9539	49.9071	0.31872	0.939	0.299278	1.37914	Up	MGI:1928375				>node 2 information	Picalm	ENSMUSG00000039361	33.0181	46.863	39.9406	0.346638	0.895	0.310241	-1.41931	Down	MGI:2385902	cell proliferation;cell differentiation
>interaction	Rad9b	Ercc1	10090.ENSMUSP00000036177	10090.ENSMUSP00000003645	0	0	0	0	0.051	0	0.9	0.083	0.905	>node 1 information	Rad9b	ENSMUSG00000038569	18.5285	27.3698	22.9491	0.385256	0.743	0.286245	-1.47717	Down	MGI:2385231				>node 2 information	Ercc1	ENSMUSG00000003549	33.0386	22.7417	27.8901	0.369195	0.8	0.295356	1.45278	Up	MGI:95412	cell proliferation;cell differentiation	abnormal male fertility;abnormal spermatogenesis
>interaction	Stx18	Kif22	10090.ENSMUSP00000109761	10090.ENSMUSP00000032915	0	0	0	0	0.052	0	0.9	0.08	0.905	>node 1 information	Stx18	ENSMUSG00000029125	14.129	7.79985	10.9644	0.577244	0.547	0.315753	1.81145	Up	MGI:1918366				>node 2 information	Kif22	ENSMUSG00000030677	20.6472	30.3917	25.5194	0.381846	0.775	0.295931	-1.47195	Down	MGI:109233
>interaction	Csnk1e	Iqcb1	10090.ENSMUSP00000113341	10090.ENSMUSP00000023535	0	0	0	0	0.053	0	0.9	0.08	0.905	>node 1 information	Csnk1e	ENSMUSG00000022433	60.3353	41.6457	50.9905	0.366531	0.943	0.345639	1.44878	Up	MGI:1351660				>node 2 information	Iqcb1	ENSMUSG00000022837	19.621	31.442	25.5315	0.462997	0.775	0.358822	-1.60247	Down	MGI:2443764	cell differentiation
>interaction	Fbxl5	Fbxo2	10090.ENSMUSP00000045792	10090.ENSMUSP00000037377	0	0	0	0	0	0	0.9	0.09	0.905	>node 1 information	Fbxl5	ENSMUSG00000039753	34.0093	48.3285	41.1689	0.347816	0.902	0.31373	-1.42104	Down	MGI:2152883				>node 2 information	Fbxo2	ENSMUSG00000041556	5.71803	2.21126	3.96464	0.88451	0.374	0.330807	2.58587	Up	MGI:2446216	cell proliferation
>interaction	Cacng5	Cacnb3	10090.ENSMUSP00000047888	10090.ENSMUSP00000003442	0	0	0	0	0.053	0	0.9	0.083	0.905	>node 1 information	Cacng5	ENSMUSG00000040373	2.08558	9.50261	5.7941	1.2801	0.423	0.541483	-4.55634	Down	MGI:2157946				>node 2 information	Cacnb3	ENSMUSG00000003352	25.5705	17.2348	21.4027	0.38947	0.724	0.281977	1.48366	Up	MGI:103307
>interaction	Nt5c3	Cmpk1	10090.ENSMUSP00000031793	10090.ENSMUSP00000030491	0	0	0	0	0.052	0	0.9	0.086	0.905	>node 1 information	Nt5c3	ENSMUSG00000029780	26.1975	39.1759	32.6867	0.397054	0.844	0.335114	-1.49541	Down	MGI:1927186				>node 2 information	Cmpk1	ENSMUSG00000028719	34.4237	55.1941	44.8089	0.463533	0.919	0.425987	-1.60337	Down	MGI:1913838
>interaction	Cops5	Mnat1	10090.ENSMUSP00000027050	10090.ENSMUSP00000021523	0	0	0	0	0.094	0	0.9	0	0.905	>node 1 information	Cops5	ENSMUSG00000025917	26.1005	36.3417	31.2211	0.328022	0.832	0.272914	-1.39238	Down	MGI:1349415				>node 2 information	Mnat1	ENSMUSG00000021103	15.9166	6.77796	11.3473	0.80536	0.556	0.44778	2.34829	Up	MGI:106207	cell proliferation	abnormal spermatogenesis
>interaction	Eps15	Arpc3	10090.ENSMUSP00000099790	10090.ENSMUSP00000099584	0	0	0	0	0.05	0.043	0.9	0.082	0.905	>node 1 information	Eps15	ENSMUSG00000028552	34.5706	56.7453	45.6579	0.48567	0.923	0.448273	-1.64143	Down	MGI:104583	cell proliferation			>node 2 information	Arpc3	ENSMUSG00000029465	57.8603	41.9539	49.9071	0.31872	0.939	0.299278	1.37914	Up	MGI:1928375
>interaction	Nde1	Xpo1	10090.ENSMUSP00000023359	10090.ENSMUSP00000020538	0	0	0	0	0.085	0.048	0.9	0	0.905	>node 1 information	Nde1	ENSMUSG00000022678	31.929	21.2906	26.6098	0.399793	0.786	0.314237	1.49968	Up	MGI:1914453	cell proliferation;cell differentiation			>node 2 information	Xpo1	ENSMUSG00000020290	43.3663	69.5431	56.4547	0.463678	0.957	0.44374	-1.60362	Down	MGI:2144013
>interaction	Nmd3	Ddx56	10090.ENSMUSP00000029358	10090.ENSMUSP00000004507	0	0	0	0	0.886	0	0	0.203	0.905	>node 1 information	Nmd3	ENSMUSG00000027787	38.0929	51.5293	44.8111	0.299845	0.919	0.275558	-1.35273	Down	MGI:2140103				>node 2 information	Ddx56	ENSMUSG00000004393	48.5664	33.3119	40.9391	0.372614	0.901	0.335725	1.45793	Up	MGI:1277172	cell differentiation
>interaction	Arpc3	Vamp3	10090.ENSMUSP00000099584	10090.ENSMUSP00000030797	0	0	0	0	0.053	0	0.9	0.082	0.905	>node 1 information	Arpc3	ENSMUSG00000029465	57.8603	41.9539	49.9071	0.31872	0.939	0.299278	1.37914	Up	MGI:1928375				>node 2 information	Vamp3	ENSMUSG00000028955	26.1553	43.0929	34.6241	0.489185	0.86	0.420699	-1.64758	Down	MGI:1321389	cell differentiation
>interaction	Nt5e	Gmps	10090.ENSMUSP00000034992	10090.ENSMUSP00000029405	0	0	0	0	0	0	0.9	0.08	0.904	>node 1 information	Nt5e	ENSMUSG00000032420	24.2773	34.4179	29.3476	0.345534	0.814	0.281265	-1.4177	Down	MGI:99782				>node 2 information	Gmps	ENSMUSG00000027823	30.2407	41.7003	35.9705	0.318583	0.871	0.277486	-1.37895	Down	MGI:2448526
>interaction	Nt5e	Aprt	10090.ENSMUSP00000034992	10090.ENSMUSP00000006764	0.067	0	0	0	0	0	0.9	0.059	0.904	>node 1 information	Nt5e	ENSMUSG00000032420	24.2773	34.4179	29.3476	0.345534	0.814	0.281265	-1.4177	Down	MGI:99782				>node 2 information	Aprt	ENSMUSG00000006589	65.9957	46.4001	56.1979	0.348689	0.956	0.333347	1.42232	Up	MGI:88061
>interaction	Nde1	Taok1	10090.ENSMUSP00000023359	10090.ENSMUSP00000017435	0	0	0	0	0.068	0	0.9	0.062	0.904	>node 1 information	Nde1	ENSMUSG00000022678	31.929	21.2906	26.6098	0.399793	0.786	0.314237	1.49968	Up	MGI:1914453	cell proliferation;cell differentiation			>node 2 information	Taok1	ENSMUSG00000017291	17.0409	26.5511	21.796	0.436328	0.729	0.318083	-1.55808	Down	MGI:1914490
>interaction	Lpar3	Cck	10090.ENSMUSP00000037712	10090.ENSMUSP00000035120	0	0	0	0	0	0.062	0.9	0.067	0.904	>node 1 information	Lpar3	ENSMUSG00000036832	16.1782	34.0462	25.1122	0.711527	0.771	0.548587	-2.10445	Down	MGI:1929469	cell differentiation			>node 2 information	Cck	ENSMUSG00000032532	0.378231	3.23965	1.80894	1.58182	0.291	0.46031	-8.56527	Down	MGI:88297	cell proliferation;cell differentiation
>interaction	Nt5c3	Pde6b	10090.ENSMUSP00000031793	10090.ENSMUSP00000031456	0	0	0	0	0	0	0.9	0.088	0.904	>node 1 information	Nt5c3	ENSMUSG00000029780	26.1975	39.1759	32.6867	0.397054	0.844	0.335114	-1.49541	Down	MGI:1927186				>node 2 information	Pde6b	ENSMUSG00000029491	1.94262	0.344584	1.1436	1.39737	0.252	0.352137	5.63758	Up	MGI:97525
>interaction	Hist1h2af	Suz12	10090.ENSMUSP00000072989	10090.ENSMUSP00000017692	0	0	0	0	0	0.069	0.9	0.053	0.904	>node 1 information	Hist1h2af	ENSMUSG00000061991	3.23177	0.591375	1.91157	1.38127	0.297	0.410237	5.46484	Up	MGI:2448309				>node 2 information	Suz12	ENSMUSG00000017548	25.5889	40.6406	33.1148	0.454532	0.848	0.385443	-1.58821	Down	MGI:1261758	cell proliferation;cell differentiation
>interaction	Eps15	M6pr	10090.ENSMUSP00000099790	10090.ENSMUSP00000007602	0	0	0	0	0	0	0.9	0.081	0.904	>node 1 information	Eps15	ENSMUSG00000028552	34.5706	56.7453	45.6579	0.48567	0.923	0.448273	-1.64143	Down	MGI:104583	cell proliferation			>node 2 information	M6pr	ENSMUSG00000007458	16.8481	34.6051	25.7266	0.690219	0.777	0.536301	-2.05395	Down	MGI:96904
>interaction	Sycp2	Atr	10090.ENSMUSP00000079909	10090.ENSMUSP00000034980	0	0	0	0	0.063	0	0.9	0.061	0.904	>node 1 information	Sycp2	ENSMUSG00000060445	10.1192	23.1841	16.6517	0.784601	0.653	0.512344	-2.2911	Down	MGI:1933281		abnormal male fertility		>node 2 information	Atr	ENSMUSG00000032409	23.1463	41.1559	32.1511	0.560155	0.84	0.47053	-1.77808	Down	MGI:108028
>interaction	Pole4	Orc5	10090.ENSMUSP00000093462	10090.ENSMUSP00000030872	0	0	0	0	0.083	0	0.9	0	0.904	>node 1 information	Pole4	ENSMUSG00000030042	28.3698	42.0755	35.2227	0.389116	0.866	0.336975	-1.48311	Down	MGI:1914229				>node 2 information	Orc5	ENSMUSG00000029012	32.0778	44.1858	38.1318	0.31753	0.885	0.281014	-1.37746	Down	MGI:1347044
>interaction	Npw	Lpar3	10090.ENSMUSP00000093200	10090.ENSMUSP00000037712	0	0	0	0	0.067	0.062	0.9	0	0.904	>node 1 information	Npw	ENSMUSG00000071230	6.14933	2.88753	4.51843	0.721888	0.39	0.281536	2.12962	Up	MGI:2685781				>node 2 information	Lpar3	ENSMUSG00000036832	16.1782	34.0462	25.1122	0.711527	0.771	0.548587	-2.10445	Down	MGI:1929469	cell differentiation
>interaction	Smarca5	Cenpk	10090.ENSMUSP00000044361	10090.ENSMUSP00000022227	0	0	0	0	0.085	0	0.9	0	0.904	>node 1 information	Smarca5	ENSMUSG00000031715	17.5076	26.9327	22.2202	0.424169	0.735	0.311764	-1.53834	Down	MGI:1935129				>node 2 information	Cenpk	ENSMUSG00000021714	9.95195	16.0237	12.9878	0.467496	0.588	0.274887	-1.61011	Down	MGI:1926210
>interaction	Kif22	Kif18b	10090.ENSMUSP00000032915	10090.ENSMUSP00000021311	0	0	0	0.731	0.793	0	0.54	0.134	0.903	>node 1 information	Kif22	ENSMUSG00000030677	20.6472	30.3917	25.5194	0.381846	0.775	0.295931	-1.47195	Down	MGI:109233				>node 2 information	Kif18b	ENSMUSG00000051378	34.2817	21.665	27.9733	0.451026	0.801	0.361272	1.58235	Up	MGI:2446979
>interaction	Hist1h2af	H3f3b	10090.ENSMUSP00000072989	10090.ENSMUSP00000016703	0	0	0	0	0.671	0.41	0	0.544	0.903	>node 1 information	Hist1h2af	ENSMUSG00000061991	3.23177	0.591375	1.91157	1.38127	0.297	0.410237	5.46484	Up	MGI:2448309				>node 2 information	H3f3b	ENSMUSG00000016559	60.638	81.5386	71.0883	0.294009	0.979	0.287835	-1.34468	Down	MGI:1101768	cell proliferation;cell differentiation	abnormal male fertility
>interaction	Rasa1	Rasal3	10090.ENSMUSP00000105179	10090.ENSMUSP00000064084	0	0	0	0.641	0	0	0.9	0.133	0.903	>node 1 information	Rasa1	ENSMUSG00000021549	28.7617	40.4315	34.5966	0.337311	0.86	0.290087	-1.40574	Down	MGI:97860	cell proliferation			>node 2 information	Rasal3	ENSMUSG00000052142	2.64598	0.787664	1.71682	1.08242	0.286	0.309571	3.35928	Up	MGI:2444128	cell proliferation
>interaction	Psma6	Dvl2	10090.ENSMUSP00000021412	10090.ENSMUSP00000019362	0	0	0	0	0.049	0	0.9	0.065	0.903	>node 1 information	Psma6	ENSMUSG00000021024	49.725	69.4944	59.6097	0.331647	0.963	0.319376	-1.39757	Down	MGI:1347006				>node 2 information	Dvl2	ENSMUSG00000020888	54.7571	39.3269	47.042	0.328009	0.93	0.305048	1.39236	Up	MGI:106613	cell proliferation
>interaction	Rbbp4	Cenpk	10090.ENSMUSP00000099658	10090.ENSMUSP00000022227	0	0	0	0	0.077	0	0.9	0	0.903	>node 1 information	Rbbp4	ENSMUSG00000057236	103.011	139.545	121.278	0.301242	0.997	0.300338	-1.35466	Down	MGI:1194912				>node 2 information	Cenpk	ENSMUSG00000021714	9.95195	16.0237	12.9878	0.467496	0.588	0.274887	-1.61011	Down	MGI:1926210
>interaction	Ppp1cc	Cenpk	10090.ENSMUSP00000099587	10090.ENSMUSP00000022227	0	0	0	0	0.075	0	0.9	0	0.903	>node 1 information	Ppp1cc	ENSMUSG00000004455	31.299	43.4603	37.3796	0.325345	0.88	0.286304	-1.38855	Down	MGI:104872	cell differentiation	abnormal male fertility		>node 2 information	Cenpk	ENSMUSG00000021714	9.95195	16.0237	12.9878	0.467496	0.588	0.274887	-1.61011	Down	MGI:1926210
>interaction	Cops2	Mnat1	10090.ENSMUSP00000028635	10090.ENSMUSP00000021523	0	0	0	0	0.07	0	0.9	0	0.903	>node 1 information	Cops2	ENSMUSG00000027206	25.3319	35.7837	30.5578	0.342034	0.826	0.28252	-1.41259	Down	MGI:1330276	cell proliferation;cell differentiation			>node 2 information	Mnat1	ENSMUSG00000021103	15.9166	6.77796	11.3473	0.80536	0.556	0.44778	2.34829	Up	MGI:106207	cell proliferation	abnormal spermatogenesis
>interaction	Pmf1	Nde1	10090.ENSMUSP00000062420	10090.ENSMUSP00000023359	0	0	0	0	0.075	0	0.9	0	0.903	>node 1 information	Pmf1	ENSMUSG00000028066	64.6266	45.8186	55.2226	0.340585	0.954	0.324918	1.41049	Up	MGI:1914287				>node 2 information	Nde1	ENSMUSG00000022678	31.929	21.2906	26.6098	0.399793	0.786	0.314237	1.49968	Up	MGI:1914453	cell proliferation;cell differentiation
>interaction	Nbas	Arcn1	10090.ENSMUSP00000036082	10090.ENSMUSP00000034607	0	0	0	0	0.075	0	0.9	0	0.903	>node 1 information	Nbas	ENSMUSG00000020576	11.911	22.7241	17.3176	0.624401	0.664	0.414602	-1.90782	Down	MGI:1918419				>node 2 information	Arcn1	ENSMUSG00000032096	36.1421	50.5648	43.3535	0.332677	0.912	0.303402	-1.39906	Down	MGI:2387591
>interaction	Ddb2	Cops2	10090.ENSMUSP00000028696	10090.ENSMUSP00000028635	0	0	0	0	0	0	0.9	0.074	0.903	>node 1 information	Ddb2	ENSMUSG00000002109	8.51632	14.176	11.3462	0.498819	0.556	0.277343	-1.66457	Down	MGI:1355314				>node 2 information	Cops2	ENSMUSG00000027206	25.3319	35.7837	30.5578	0.342034	0.826	0.28252	-1.41259	Down	MGI:1330276	cell proliferation;cell differentiation
>interaction	Fbxl5	Fbxl3	10090.ENSMUSP00000045792	10090.ENSMUSP00000022720	0	0	0	0	0.074	0	0.9	0	0.903	>node 1 information	Fbxl5	ENSMUSG00000039753	34.0093	48.3285	41.1689	0.347816	0.902	0.31373	-1.42104	Down	MGI:2152883				>node 2 information	Fbxl3	ENSMUSG00000022124	19.264	29.4556	24.3598	0.418378	0.763	0.319222	-1.52905	Down	MGI:1354702
>interaction	Arpc5	Picalm	10090.ENSMUSP00000076933	10090.ENSMUSP00000051092	0	0	0	0	0.075	0	0.9	0	0.903	>node 1 information	Arpc5	ENSMUSG00000008475	22.2541	35.4329	28.8435	0.456908	0.809	0.369639	-1.5922	Down	MGI:1915021				>node 2 information	Picalm	ENSMUSG00000039361	33.0181	46.863	39.9406	0.346638	0.895	0.310241	-1.41931	Down	MGI:2385902	cell proliferation;cell differentiation
>interaction	Gpr45	Adcyap1r1	10090.ENSMUSP00000110409	10090.ENSMUSP00000063784	0	0	0	0	0.049	0.048	0.9	0.063	0.903	>node 1 information	Gpr45	ENSMUSG00000041907	2.82254	0.699284	1.76091	1.20577	0.288	0.347262	4.03633	Up	MGI:2135882				>node 2 information	Adcyap1r1	ENSMUSG00000029778	8.31049	3.88397	6.09723	0.725989	0.431	0.312901	2.13969	Up	MGI:108449	cell differentiation
>interaction	Hist1h3e	Ash1l	10090.ENSMUSP00000100739	10090.ENSMUSP00000088451	0	0	0	0	0.053	0.761	0	0.606	0.903	>node 1 information	Hist1h3e	ENSMUSG00000069273	2.38594	0.341943	1.36394	1.4986	0.266	0.398626	6.9776	Up	MGI:2448326				>node 2 information	Ash1l	ENSMUSG00000028053	20.181	29.1935	24.6872	0.365067	0.766	0.279641	-1.44658	Down	MGI:2183158		abnormal male fertility
>interaction	Pla2g1b	Pafah1b1	10090.ENSMUSP00000031495	10090.ENSMUSP00000021091	0	0	0	0	0.05	0	0.9	0.064	0.903	>node 1 information	Pla2g1b	ENSMUSG00000029522	13.8115	7.03265	10.4221	0.650432	0.535	0.347981	1.96391	Up	MGI:101842				>node 2 information	Pafah1b1	ENSMUSG00000020745	37.7155	55.4333	46.5744	0.380419	0.928	0.353029	-1.46978	Down	MGI:109520	cell proliferation;cell differentiation	abnormal male fertility
>interaction	Nt5e	Pde6b	10090.ENSMUSP00000034992	10090.ENSMUSP00000031456	0	0	0	0	0.043	0	0.9	0.07	0.903	>node 1 information	Nt5e	ENSMUSG00000032420	24.2773	34.4179	29.3476	0.345534	0.814	0.281265	-1.4177	Down	MGI:99782				>node 2 information	Pde6b	ENSMUSG00000029491	1.94262	0.344584	1.1436	1.39737	0.252	0.352137	5.63758	Up	MGI:97525
>interaction	Psmd14	Dvl2	10090.ENSMUSP00000028278	10090.ENSMUSP00000019362	0	0	0	0	0.053	0.061	0.9	0	0.903	>node 1 information	Psmd14	ENSMUSG00000026914	35.7514	55.7193	45.7353	0.436597	0.924	0.403415	-1.55852	Down	MGI:1913284				>node 2 information	Dvl2	ENSMUSG00000020888	54.7571	39.3269	47.042	0.328009	0.93	0.305048	1.39236	Up	MGI:106613	cell proliferation
>interaction	Copb1	Kif22	10090.ENSMUSP00000033012	10090.ENSMUSP00000032915	0	0	0	0	0.051	0.044	0.9	0.063	0.903	>node 1 information	Copb1	ENSMUSG00000030754	31.331	43.654	37.4925	0.328679	0.88	0.289238	-1.39332	Down	MGI:1917599				>node 2 information	Kif22	ENSMUSG00000030677	20.6472	30.3917	25.5194	0.381846	0.775	0.295931	-1.47195	Down	MGI:109233
>interaction	Vamp3	Bin1	10090.ENSMUSP00000030797	10090.ENSMUSP00000025239	0	0	0	0	0	0	0.9	0.063	0.902	>node 1 information	Vamp3	ENSMUSG00000028955	26.1553	43.0929	34.6241	0.489185	0.86	0.420699	-1.64758	Down	MGI:1321389	cell differentiation			>node 2 information	Bin1	ENSMUSG00000024381	19.4043	10.6341	15.0192	0.583933	0.628	0.36671	1.82472	Up	MGI:108092	cell differentiation
>interaction	Npw	Drd4	10090.ENSMUSP00000093200	10090.ENSMUSP00000026569	0	0	0	0	0	0.062	0.9	0	0.902	>node 1 information	Npw	ENSMUSG00000071230	6.14933	2.88753	4.51843	0.721888	0.39	0.281536	2.12962	Up	MGI:2685781				>node 2 information	Drd4	ENSMUSG00000025496	9.8926	26.0747	17.9837	0.899823	0.673	0.605581	-2.63578	Down	MGI:94926
>interaction	Hist1h2af	Sycp3	10090.ENSMUSP00000072989	10090.ENSMUSP00000020252	0	0	0	0	0	0	0.9	0.062	0.902	>node 1 information	Hist1h2af	ENSMUSG00000061991	3.23177	0.591375	1.91157	1.38127	0.297	0.410237	5.46484	Up	MGI:2448309				>node 2 information	Sycp3	ENSMUSG00000020059	24.6262	56.2319	40.429	0.781757	0.898	0.702018	-2.28342	Down	MGI:109542	cell differentiation	abnormal male fertility
>interaction	Shfm1	Psmd14	10090.ENSMUSP00000040741	10090.ENSMUSP00000028278	0	0	0	0	0.14	0.802	0.36	0.208	0.902	>node 1 information	Shfm1	ENSMUSG00000042541	43.394	60.2521	51.8231	0.325301	0.945	0.30741	-1.38849	Down	MGI:109238				>node 2 information	Psmd14	ENSMUSG00000026914	35.7514	55.7193	45.7353	0.436597	0.924	0.403415	-1.55852	Down	MGI:1913284
>interaction	Picalm	Ap3s1	10090.ENSMUSP00000051092	10090.ENSMUSP00000025357	0	0	0	0	0	0	0.9	0.065	0.902	>node 1 information	Picalm	ENSMUSG00000039361	33.0181	46.863	39.9406	0.346638	0.895	0.310241	-1.41931	Down	MGI:2385902	cell proliferation;cell differentiation			>node 2 information	Ap3s1	ENSMUSG00000024480	14.149	32.84	23.4945	0.795548	0.75	0.596661	-2.32101	Down	MGI:1337062
>interaction	Ube2d3	Bmi1	10090.ENSMUSP00000101898	10090.ENSMUSP00000028071	0	0	0	0	0.21	0.88	0	0.051	0.902	>node 1 information	Ube2d3	ENSMUSG00000078578	18.9692	28.5682	23.7687	0.40385	0.754	0.304503	-1.50603	Down	MGI:1913355				>node 2 information	Bmi1	ENSMUSG00000026739	17.039	25.2217	21.1303	0.387249	0.721	0.279206	-1.48023	Down	MGI:88174	cell proliferation;cell differentiation
>interaction	Tmsb4x	Actn1	10090.ENSMUSP00000107795	10090.ENSMUSP00000021554	0	0	0	0	0.045	0	0.9	0.06	0.902	>node 1 information	Tmsb4x	ENSMUSG00000049775	52.1334	91.3732	71.7533	0.546871	0.98	0.535934	-1.75268	Down	MGI:99510	cell differentiation			>node 2 information	Actn1	ENSMUSG00000015143	14.1553	7.81392	10.9846	0.577297	0.547	0.315781	1.81155	Up	MGI:2137706	cell differentiation
>interaction	Elavl2	Srsf2	10090.ENSMUSP00000099863	10090.ENSMUSP00000090059	0	0	0	0.681	0	0	0.9	0.127	0.902	>node 1 information	Elavl2	ENSMUSG00000008489	17.0204	26.6068	21.8136	0.439469	0.73	0.320812	-1.56323	Down	MGI:1100887				>node 2 information	Srsf2	ENSMUSG00000034120	58.934	85.9297	72.4318	0.372705	0.981	0.365623	-1.45807	Down	MGI:98284
>interaction	Xrcc1	Mnat1	10090.ENSMUSP00000070995	10090.ENSMUSP00000021523	0	0	0	0	0.066	0	0.9	0	0.902	>node 1 information	Xrcc1	ENSMUSG00000051768	47.1552	32.9409	40.0481	0.354931	0.896	0.318018	1.43151	Up	MGI:99137				>node 2 information	Mnat1	ENSMUSG00000021103	15.9166	6.77796	11.3473	0.80536	0.556	0.44778	2.34829	Up	MGI:106207	cell proliferation	abnormal spermatogenesis
>interaction	Fam3c	Actn1	10090.ENSMUSP00000127709	10090.ENSMUSP00000021554	0	0	0	0	0.063	0	0.9	0.045	0.902	>node 1 information	Fam3c	ENSMUSG00000029672	22.1138	32.8607	27.4872	0.390978	0.796	0.311218	-1.48598	Down	MGI:107892				>node 2 information	Actn1	ENSMUSG00000015143	14.1553	7.81392	10.9846	0.577297	0.547	0.315781	1.81155	Up	MGI:2137706	cell differentiation
>interaction	Ppp3r1	Plcg2	10090.ENSMUSP00000099944	10090.ENSMUSP00000079991	0	0	0	0	0	0.062	0.9	0	0.902	>node 1 information	Ppp3r1	ENSMUSG00000033953	33.0538	45.3989	39.2263	0.314714	0.891	0.280411	-1.37349	Down	MGI:107172	cell differentiation			>node 2 information	Plcg2	ENSMUSG00000034330	26.3701	15.5815	20.9758	0.514336	0.718	0.369293	1.6924	Up	MGI:97616	cell differentiation
>interaction	Picalm	M6pr	10090.ENSMUSP00000051092	10090.ENSMUSP00000007602	0	0	0	0	0.066	0	0.9	0.044	0.902	>node 1 information	Picalm	ENSMUSG00000039361	33.0181	46.863	39.9406	0.346638	0.895	0.310241	-1.41931	Down	MGI:2385902	cell proliferation;cell differentiation			>node 2 information	M6pr	ENSMUSG00000007458	16.8481	34.6051	25.7266	0.690219	0.777	0.536301	-2.05395	Down	MGI:96904
>interaction	Birc2	Psmd14	10090.ENSMUSP00000091422	10090.ENSMUSP00000028278	0	0	0	0	0.05	0	0.9	0.052	0.902	>node 1 information	Birc2	ENSMUSG00000057367	26.647	38.5157	32.5814	0.364279	0.844	0.307451	-1.4454	Down	MGI:1197009				>node 2 information	Psmd14	ENSMUSG00000026914	35.7514	55.7193	45.7353	0.436597	0.924	0.403415	-1.55852	Down	MGI:1913284
>interaction	Nde1	Cenpk	10090.ENSMUSP00000023359	10090.ENSMUSP00000022227	0	0	0	0	0.065	0	0.9	0	0.902	>node 1 information	Nde1	ENSMUSG00000022678	31.929	21.2906	26.6098	0.399793	0.786	0.314237	1.49968	Up	MGI:1914453	cell proliferation;cell differentiation			>node 2 information	Cenpk	ENSMUSG00000021714	9.95195	16.0237	12.9878	0.467496	0.588	0.274887	-1.61011	Down	MGI:1926210
>interaction	Picalm	Tfrc	10090.ENSMUSP00000051092	10090.ENSMUSP00000023486	0	0	0	0	0	0	0.9	0.066	0.902	>node 1 information	Picalm	ENSMUSG00000039361	33.0181	46.863	39.9406	0.346638	0.895	0.310241	-1.41931	Down	MGI:2385902	cell proliferation;cell differentiation			>node 2 information	Tfrc	ENSMUSG00000022797	25.1625	45.0408	35.1016	0.566307	0.865	0.489855	-1.79	Down	MGI:98822	cell proliferation;cell differentiation
>interaction	Ccne2	Psmd14	10090.ENSMUSP00000103960	10090.ENSMUSP00000028278	0	0	0	0	0	0	0.9	0.064	0.902	>node 1 information	Ccne2	ENSMUSG00000028212	9.17713	18.8589	14.018	0.690666	0.609	0.420616	-2.05499	Down	MGI:1329034		abnormal male fertility;abnormal spermatogenesis		>node 2 information	Psmd14	ENSMUSG00000026914	35.7514	55.7193	45.7353	0.436597	0.924	0.403415	-1.55852	Down	MGI:1913284
>interaction	Gpx7	Mgst1	10090.ENSMUSP00000030332	10090.ENSMUSP00000008684	0	0	0	0	0	0	0.9	0.064	0.902	>node 1 information	Gpx7	ENSMUSG00000028597	12.2784	6.4797	9.37905	0.618261	0.511	0.315931	1.8949	Up	MGI:1914555				>node 2 information	Mgst1	ENSMUSG00000008540	35.8576	54.8446	45.3511	0.418667	0.921	0.385592	-1.52951	Down	MGI:1913850
>interaction	Rpl19	C1d	10090.ENSMUSP00000017548	10090.ENSMUSP00000000594	0	0	0	0	0.067	0	0.9	0	0.902	>node 1 information	Rpl19	ENSMUSG00000017404	16.2771	4.48338	10.3802	1.13617	0.534	0.606715	3.63054	Up	MGI:98020				>node 2 information	C1d	ENSMUSG00000000581	6.17138	11.2441	8.70774	0.582553	0.494	0.287781	-1.82197	Down	MGI:1927354
>interaction	Taf13	Mnat1	10090.ENSMUSP00000121346	10090.ENSMUSP00000021523	0	0	0	0	0.069	0	0.9	0	0.902	>node 1 information	Taf13	ENSMUSG00000048100	13.9607	21.1654	17.5631	0.410219	0.667	0.273616	-1.51607	Down	MGI:1913500				>node 2 information	Mnat1	ENSMUSG00000021103	15.9166	6.77796	11.3473	0.80536	0.556	0.44778	2.34829	Up	MGI:106207	cell proliferation	abnormal spermatogenesis
>interaction	Yipf6	Ap3s1	10090.ENSMUSP00000056039	10090.ENSMUSP00000025357	0	0	0	0	0.062	0	0.9	0	0.902	>node 1 information	Yipf6	ENSMUSG00000047694	7.39494	14.1551	10.775	0.627392	0.543	0.340674	-1.91416	Down	MGI:1925179	cell differentiation			>node 2 information	Ap3s1	ENSMUSG00000024480	14.149	32.84	23.4945	0.795548	0.75	0.596661	-2.32101	Down	MGI:1337062
>interaction	Plcg2	Mtmr1	10090.ENSMUSP00000079991	10090.ENSMUSP00000015358	0	0	0	0	0.053	0	0.9	0.044	0.901	>node 1 information	Plcg2	ENSMUSG00000034330	26.3701	15.5815	20.9758	0.514336	0.718	0.369293	1.6924	Up	MGI:97616	cell differentiation			>node 2 information	Mtmr1	ENSMUSG00000015214	6.64978	11.8541	9.25194	0.562511	0.508	0.285756	-1.78263	Down	MGI:1858271
>interaction	Ppp1cc	Pmf1	10090.ENSMUSP00000099587	10090.ENSMUSP00000062420	0	0	0	0	0	0.059	0.9	0	0.901	>node 1 information	Ppp1cc	ENSMUSG00000004455	31.299	43.4603	37.3796	0.325345	0.88	0.286304	-1.38855	Down	MGI:104872	cell differentiation	abnormal male fertility		>node 2 information	Pmf1	ENSMUSG00000028066	64.6266	45.8186	55.2226	0.340585	0.954	0.324918	1.41049	Up	MGI:1914287
>interaction	Uba6	Wsb1	10090.ENSMUSP00000035328	10090.ENSMUSP00000017821	0	0	0	0	0.054	0	0.9	0	0.901	>node 1 information	Uba6	ENSMUSG00000035898	16.5199	28.092	22.3059	0.51879	0.736	0.381829	-1.70049	Down	MGI:1913894				>node 2 information	Wsb1	ENSMUSG00000017677	35.5432	50.3479	42.9455	0.344732	0.911	0.314051	-1.41653	Down	MGI:1926139
>interaction	Birc2	Psma6	10090.ENSMUSP00000091422	10090.ENSMUSP00000021412	0	0	0	0	0.052	0	0.9	0	0.901	>node 1 information	Birc2	ENSMUSG00000057367	26.647	38.5157	32.5814	0.364279	0.844	0.307451	-1.4454	Down	MGI:1197009				>node 2 information	Psma6	ENSMUSG00000021024	49.725	69.4944	59.6097	0.331647	0.963	0.319376	-1.39757	Down	MGI:1347006
>interaction	Pole4	Mcm8	10090.ENSMUSP00000093462	10090.ENSMUSP00000066842	0	0	0	0	0.053	0	0.9	0.043	0.901	>node 1 information	Pole4	ENSMUSG00000030042	28.3698	42.0755	35.2227	0.389116	0.866	0.336975	-1.48311	Down	MGI:1914229				>node 2 information	Mcm8	ENSMUSG00000027353	15.6926	25.9249	20.8087	0.491731	0.716	0.352079	-1.65205	Down	MGI:1913884		abnormal male fertility
>interaction	Picalm	Dvl2	10090.ENSMUSP00000051092	10090.ENSMUSP00000019362	0	0	0	0	0	0	0.9	0.059	0.901	>node 1 information	Picalm	ENSMUSG00000039361	33.0181	46.863	39.9406	0.346638	0.895	0.310241	-1.41931	Down	MGI:2385902	cell proliferation;cell differentiation			>node 2 information	Dvl2	ENSMUSG00000020888	54.7571	39.3269	47.042	0.328009	0.93	0.305048	1.39236	Up	MGI:106613	cell proliferation
>interaction	Pmf1	Cenpk	10090.ENSMUSP00000062420	10090.ENSMUSP00000022227	0	0	0	0	0.055	0	0.9	0	0.901	>node 1 information	Pmf1	ENSMUSG00000028066	64.6266	45.8186	55.2226	0.340585	0.954	0.324918	1.41049	Up	MGI:1914287				>node 2 information	Cenpk	ENSMUSG00000021714	9.95195	16.0237	12.9878	0.467496	0.588	0.274887	-1.61011	Down	MGI:1926210
>interaction	Arcn1	Kif22	10090.ENSMUSP00000034607	10090.ENSMUSP00000032915	0	0	0	0	0.054	0	0.9	0	0.901	>node 1 information	Arcn1	ENSMUSG00000032096	36.1421	50.5648	43.3535	0.332677	0.912	0.303402	-1.39906	Down	MGI:2387591				>node 2 information	Kif22	ENSMUSG00000030677	20.6472	30.3917	25.5194	0.381846	0.775	0.295931	-1.47195	Down	MGI:109233
>interaction	Cdk1	Taok1	10090.ENSMUSP00000020099	10090.ENSMUSP00000017435	0	0	0	0.741	0.052	0	0.9	0	0.901	>node 1 information	Cdk1	ENSMUSG00000019942	57.6102	40.4389	49.0245	0.350259	0.936	0.327843	1.42462	Up	MGI:88351	cell proliferation;cell differentiation			>node 2 information	Taok1	ENSMUSG00000017291	17.0409	26.5511	21.796	0.436328	0.729	0.318083	-1.55808	Down	MGI:1914490
>interaction	Fbxo2	Wsb1	10090.ENSMUSP00000037377	10090.ENSMUSP00000017821	0	0	0	0	0	0	0.9	0.059	0.901	>node 1 information	Fbxo2	ENSMUSG00000041556	5.71803	2.21126	3.96464	0.88451	0.374	0.330807	2.58587	Up	MGI:2446216	cell proliferation			>node 2 information	Wsb1	ENSMUSG00000017677	35.5432	50.3479	42.9455	0.344732	0.911	0.314051	-1.41653	Down	MGI:1926139
>interaction	Arpc5	Vamp3	10090.ENSMUSP00000076933	10090.ENSMUSP00000030797	0	0	0	0	0.053	0	0.9	0	0.901	>node 1 information	Arpc5	ENSMUSG00000008475	22.2541	35.4329	28.8435	0.456908	0.809	0.369639	-1.5922	Down	MGI:1915021				>node 2 information	Vamp3	ENSMUSG00000028955	26.1553	43.0929	34.6241	0.489185	0.86	0.420699	-1.64758	Down	MGI:1321389	cell differentiation
>interaction	Atp6v1h	Tfrc	10090.ENSMUSP00000040756	10090.ENSMUSP00000023486	0	0	0	0	0.053	0	0.9	0	0.901	>node 1 information	Atp6v1h	ENSMUSG00000033793	24.4935	40.1146	32.304	0.483565	0.841	0.406678	-1.63777	Down	MGI:1914864				>node 2 information	Tfrc	ENSMUSG00000022797	25.1625	45.0408	35.1016	0.566307	0.865	0.489855	-1.79	Down	MGI:98822	cell proliferation;cell differentiation
>interaction	Adcyap1r1	Lhcgr	10090.ENSMUSP00000063784	10090.ENSMUSP00000024916	0	0	0	0	0.053	0	0.9	0	0.901	>node 1 information	Adcyap1r1	ENSMUSG00000029778	8.31049	3.88397	6.09723	0.725989	0.431	0.312901	2.13969	Up	MGI:108449	cell differentiation			>node 2 information	Lhcgr	ENSMUSG00000024107	3.84609	0.8625	2.3543	1.2673	0.317	0.401733	4.45923	Up	MGI:96783	cell differentiation	abnormal male fertility
>interaction	Yipf6	Picalm	10090.ENSMUSP00000056039	10090.ENSMUSP00000051092	0	0	0	0	0.052	0	0.9	0	0.901	>node 1 information	Yipf6	ENSMUSG00000047694	7.39494	14.1551	10.775	0.627392	0.543	0.340674	-1.91416	Down	MGI:1925179	cell differentiation			>node 2 information	Picalm	ENSMUSG00000039361	33.0181	46.863	39.9406	0.346638	0.895	0.310241	-1.41931	Down	MGI:2385902	cell proliferation;cell differentiation
>interaction	Rlim	Fbxl5	10090.ENSMUSP00000070662	10090.ENSMUSP00000045792	0	0	0	0	0.052	0	0.9	0	0.901	>node 1 information	Rlim	ENSMUSG00000056537	18.0654	30.5123	24.2889	0.512453	0.761	0.389977	-1.68899	Down	MGI:1342291				>node 2 information	Fbxl5	ENSMUSG00000039753	34.0093	48.3285	41.1689	0.347816	0.902	0.31373	-1.42104	Down	MGI:2152883
>interaction	Nt5c3	Gmpr	10090.ENSMUSP00000031793	10090.ENSMUSP00000000260	0	0	0	0	0.053	0	0.9	0	0.901	>node 1 information	Nt5c3	ENSMUSG00000029780	26.1975	39.1759	32.6867	0.397054	0.844	0.335114	-1.49541	Down	MGI:1927186				>node 2 information	Gmpr	ENSMUSG00000000253	18.397	11.1919	14.7944	0.487014	0.622	0.302923	1.64378	Up	MGI:1913605
>interaction	Col13a1	Col1a2	10090.ENSMUSP00000101094	10090.ENSMUSP00000031668	0	0	0	0.632	0	0	0.9	0.091	0.901	>node 1 information	Col13a1	ENSMUSG00000058806	4.2817	1.52327	2.90248	0.950368	0.338	0.321225	2.81086	Up	MGI:1277201	cell differentiation			>node 2 information	Col1a2	ENSMUSG00000029661	7.73864	3.26641	5.50253	0.81276	0.416	0.338108	2.36916	Up	MGI:88468
>interaction	Pmf1	Xpo1	10090.ENSMUSP00000062420	10090.ENSMUSP00000020538	0	0	0	0	0.053	0	0.9	0	0.901	>node 1 information	Pmf1	ENSMUSG00000028066	64.6266	45.8186	55.2226	0.340585	0.954	0.324918	1.41049	Up	MGI:1914287				>node 2 information	Xpo1	ENSMUSG00000020290	43.3663	69.5431	56.4547	0.463678	0.957	0.44374	-1.60362	Down	MGI:2144013
>interaction	Thoc2	Nudt21	10090.ENSMUSP00000044677	10090.ENSMUSP00000034204	0	0	0	0	0.053	0	0.9	0	0.901	>node 1 information	Thoc2	ENSMUSG00000037475	14.1102	22.1095	18.1099	0.44171	0.674	0.297712	-1.56692	Down	MGI:2442413	cell differentiation			>node 2 information	Nudt21	ENSMUSG00000031754	3.47487	8.94399	6.20943	0.880776	0.434	0.382257	-2.57391	Down	MGI:1915469
>interaction	Gcc1	Cog5	10090.ENSMUSP00000067395	10090.ENSMUSP00000044797	0	0	0	0	0.053	0	0.9	0.047	0.901	>node 1 information	Gcc1	ENSMUSG00000029708	8.87331	16.699	12.7862	0.612044	0.585	0.358046	-1.88194	Down	MGI:1921625				>node 2 information	Cog5	ENSMUSG00000035933	15.5768	24.5444	20.0606	0.447026	0.705	0.315153	-1.5757	Down	MGI:2145130
>interaction	Top2a	Lin37	10090.ENSMUSP00000068896	10090.ENSMUSP00000048557	0	0	0	0	0	0	0.9	0.06	0.901	>node 1 information	Top2a	ENSMUSG00000020914	47.0462	64.8343	55.9402	0.317984	0.955	0.303675	-1.3781	Down	MGI:98790	cell differentiation			>node 2 information	Lin37	ENSMUSG00000036845	10.1795	4.87895	7.52923	0.703997	0.468	0.32947	2.08641	Up	MGI:1922910
>interaction	Stx18	Copb1	10090.ENSMUSP00000109761	10090.ENSMUSP00000033012	0	0	0	0	0.055	0	0.9	0	0.901	>node 1 information	Stx18	ENSMUSG00000029125	14.129	7.79985	10.9644	0.577244	0.547	0.315753	1.81145	Up	MGI:1918366				>node 2 information	Copb1	ENSMUSG00000030754	31.331	43.654	37.4925	0.328679	0.88	0.289238	-1.39332	Down	MGI:1917599
>interaction	Eps15	Dvl2	10090.ENSMUSP00000099790	10090.ENSMUSP00000019362	0	0	0	0	0.053	0	0.9	0	0.901	>node 1 information	Eps15	ENSMUSG00000028552	34.5706	56.7453	45.6579	0.48567	0.923	0.448273	-1.64143	Down	MGI:104583	cell proliferation			>node 2 information	Dvl2	ENSMUSG00000020888	54.7571	39.3269	47.042	0.328009	0.93	0.305048	1.39236	Up	MGI:106613	cell proliferation
>interaction	Pf4	Actn1	10090.ENSMUSP00000031320	10090.ENSMUSP00000021554	0	0	0	0	0	0	0.9	0.058	0.901	>node 1 information	Pf4	ENSMUSG00000029373	5.26837	1.96588	3.61713	0.913015	0.362	0.330511	2.6799	Up	MGI:1888711	cell proliferation;cell differentiation			>node 2 information	Actn1	ENSMUSG00000015143	14.1553	7.81392	10.9846	0.577297	0.547	0.315781	1.81155	Up	MGI:2137706	cell differentiation
>interaction	Atp6v1g1	Tfrc	10090.ENSMUSP00000048770	10090.ENSMUSP00000023486	0	0	0	0	0.054	0	0.9	0	0.901	>node 1 information	Atp6v1g1	ENSMUSG00000039105	26.6606	38.6864	32.6735	0.36806	0.844	0.310642	-1.45107	Down	MGI:1913540				>node 2 information	Tfrc	ENSMUSG00000022797	25.1625	45.0408	35.1016	0.566307	0.865	0.489855	-1.79	Down	MGI:98822	cell proliferation;cell differentiation
>interaction	Nbas	Kif22	10090.ENSMUSP00000036082	10090.ENSMUSP00000032915	0	0	0	0	0.053	0	0.9	0	0.901	>node 1 information	Nbas	ENSMUSG00000020576	11.911	22.7241	17.3176	0.624401	0.664	0.414602	-1.90782	Down	MGI:1918419				>node 2 information	Kif22	ENSMUSG00000030677	20.6472	30.3917	25.5194	0.381846	0.775	0.295931	-1.47195	Down	MGI:109233
>interaction	Ppp1cc	Taok1	10090.ENSMUSP00000099587	10090.ENSMUSP00000017435	0	0	0	0	0.054	0	0.9	0	0.901	>node 1 information	Ppp1cc	ENSMUSG00000004455	31.299	43.4603	37.3796	0.325345	0.88	0.286304	-1.38855	Down	MGI:104872	cell differentiation	abnormal male fertility		>node 2 information	Taok1	ENSMUSG00000017291	17.0409	26.5511	21.796	0.436328	0.729	0.318083	-1.55808	Down	MGI:1914490
>interaction	Tnks2	Psma6	10090.ENSMUSP00000025729	10090.ENSMUSP00000021412	0	0	0	0	0.053	0	0.9	0	0.901	>node 1 information	Tnks2	ENSMUSG00000024811	20.2129	30.4729	25.3429	0.404846	0.773	0.312946	-1.5076	Down	MGI:1921743				>node 2 information	Psma6	ENSMUSG00000021024	49.725	69.4944	59.6097	0.331647	0.963	0.319376	-1.39757	Down	MGI:1347006
>interaction	Psmd6	Dvl2	10090.ENSMUSP00000022256	10090.ENSMUSP00000019362	0	0	0	0	0.053	0	0.9	0	0.901	>node 1 information	Psmd6	ENSMUSG00000021737	40.3639	54.0615	47.2127	0.290125	0.93	0.269817	-1.33935	Down	MGI:1913663				>node 2 information	Dvl2	ENSMUSG00000020888	54.7571	39.3269	47.042	0.328009	0.93	0.305048	1.39236	Up	MGI:106613	cell proliferation
>interaction	Nphp4	Cdk1	10090.ENSMUSP00000049920	10090.ENSMUSP00000020099	0	0	0	0	0.052	0	0.9	0	0.901	>node 1 information	Nphp4	ENSMUSG00000039577	15.0623	9.15151	12.1069	0.488216	0.572	0.27926	1.64588	Up	MGI:2384210	cell differentiation	abnormal male fertility		>node 2 information	Cdk1	ENSMUSG00000019942	57.6102	40.4389	49.0245	0.350259	0.936	0.327843	1.42462	Up	MGI:88351	cell proliferation;cell differentiation
>interaction	Eps15	Spry1	10090.ENSMUSP00000099790	10090.ENSMUSP00000049292	0	0	0	0	0	0	0.9	0.051	0.901	>node 1 information	Eps15	ENSMUSG00000028552	34.5706	56.7453	45.6579	0.48567	0.923	0.448273	-1.64143	Down	MGI:104583	cell proliferation			>node 2 information	Spry1	ENSMUSG00000037211	8.2151	4.27141	6.24326	0.631672	0.435	0.274777	1.92328	Up	MGI:1345139	cell proliferation
>interaction	Vamp3	Dvl2	10090.ENSMUSP00000030797	10090.ENSMUSP00000019362	0	0	0	0	0	0	0.9	0	0.9	>node 1 information	Vamp3	ENSMUSG00000028955	26.1553	43.0929	34.6241	0.489185	0.86	0.420699	-1.64758	Down	MGI:1321389	cell differentiation			>node 2 information	Dvl2	ENSMUSG00000020888	54.7571	39.3269	47.042	0.328009	0.93	0.305048	1.39236	Up	MGI:106613	cell proliferation
>interaction	Fam3c	Pf4	10090.ENSMUSP00000127709	10090.ENSMUSP00000031320	0	0	0	0	0	0	0.9	0	0.9	>node 1 information	Fam3c	ENSMUSG00000029672	22.1138	32.8607	27.4872	0.390978	0.796	0.311218	-1.48598	Down	MGI:107892				>node 2 information	Pf4	ENSMUSG00000029373	5.26837	1.96588	3.61713	0.913015	0.362	0.330511	2.6799	Up	MGI:1888711	cell proliferation;cell differentiation
>interaction	Col13a1	Col4a1	10090.ENSMUSP00000101094	10090.ENSMUSP00000033898	0	0	0	0.642	0	0	0.9	0.059	0.9	>node 1 information	Col13a1	ENSMUSG00000058806	4.2817	1.52327	2.90248	0.950368	0.338	0.321225	2.81086	Up	MGI:1277201	cell differentiation			>node 2 information	Col4a1	ENSMUSG00000031502	27.9753	18.7343	23.3548	0.395679	0.749	0.296363	1.49327	Up	MGI:88454
>interaction	Cenpk	Taok1	10090.ENSMUSP00000022227	10090.ENSMUSP00000017435	0	0	0	0	0	0	0.9	0	0.9	>node 1 information	Cenpk	ENSMUSG00000021714	9.95195	16.0237	12.9878	0.467496	0.588	0.274887	-1.61011	Down	MGI:1926210				>node 2 information	Taok1	ENSMUSG00000017291	17.0409	26.5511	21.796	0.436328	0.729	0.318083	-1.55808	Down	MGI:1914490
>interaction	Ggt7	Mgst1	10090.ENSMUSP00000029131	10090.ENSMUSP00000008684	0	0	0	0	0.046	0	0.9	0	0.9	>node 1 information	Ggt7	ENSMUSG00000027603	8.76308	4.19023	6.47666	0.706051	0.44	0.310663	2.09131	Up	MGI:1913385				>node 2 information	Mgst1	ENSMUSG00000008540	35.8576	54.8446	45.3511	0.418667	0.921	0.385592	-1.52951	Down	MGI:1913850
>interaction	Nt5c3	Hprt	10090.ENSMUSP00000031793	10090.ENSMUSP00000026723	0	0	0	0	0	0	0.9	0	0.9	>node 1 information	Nt5c3	ENSMUSG00000029780	26.1975	39.1759	32.6867	0.397054	0.844	0.335114	-1.49541	Down	MGI:1927186				>node 2 information	Hprt	ENSMUSG00000025630	29.9106	41.64	35.7753	0.327863	0.87	0.285241	-1.39215	Down	MGI:96217	cell proliferation;cell differentiation
>interaction	Smarca5	Sall1	10090.ENSMUSP00000044361	10090.ENSMUSP00000034090	0	0	0	0	0	0	0.9	0	0.9	>node 1 information	Smarca5	ENSMUSG00000031715	17.5076	26.9327	22.2202	0.424169	0.735	0.311764	-1.53834	Down	MGI:1935129				>node 2 information	Sall1	ENSMUSG00000031665	17.6123	9.3015	13.4569	0.617587	0.597	0.368699	1.89349	Up	MGI:1889585	cell proliferation;cell differentiation
>interaction	Pmf1	Pafah1b1	10090.ENSMUSP00000062420	10090.ENSMUSP00000021091	0	0	0	0	0	0	0.9	0	0.9	>node 1 information	Pmf1	ENSMUSG00000028066	64.6266	45.8186	55.2226	0.340585	0.954	0.324918	1.41049	Up	MGI:1914287				>node 2 information	Pafah1b1	ENSMUSG00000020745	37.7155	55.4333	46.5744	0.380419	0.928	0.353029	-1.46978	Down	MGI:109520	cell proliferation;cell differentiation	abnormal male fertility
>interaction	Stx18	Vamp3	10090.ENSMUSP00000109761	10090.ENSMUSP00000030797	0	0	0	0	0.049	0.649	0.54	0.43	0.9	>node 1 information	Stx18	ENSMUSG00000029125	14.129	7.79985	10.9644	0.577244	0.547	0.315753	1.81145	Up	MGI:1918366				>node 2 information	Vamp3	ENSMUSG00000028955	26.1553	43.0929	34.6241	0.489185	0.86	0.420699	-1.64758	Down	MGI:1321389	cell differentiation
>interaction	Yipf6	Tfrc	10090.ENSMUSP00000056039	10090.ENSMUSP00000023486	0	0	0	0	0	0	0.9	0	0.9	>node 1 information	Yipf6	ENSMUSG00000047694	7.39494	14.1551	10.775	0.627392	0.543	0.340674	-1.91416	Down	MGI:1925179	cell differentiation			>node 2 information	Tfrc	ENSMUSG00000022797	25.1625	45.0408	35.1016	0.566307	0.865	0.489855	-1.79	Down	MGI:98822	cell proliferation;cell differentiation
>interaction	Fbxl5	Uba6	10090.ENSMUSP00000045792	10090.ENSMUSP00000035328	0	0	0	0	0.043	0	0.9	0	0.9	>node 1 information	Fbxl5	ENSMUSG00000039753	34.0093	48.3285	41.1689	0.347816	0.902	0.31373	-1.42104	Down	MGI:2152883				>node 2 information	Uba6	ENSMUSG00000035898	16.5199	28.092	22.3059	0.51879	0.736	0.381829	-1.70049	Down	MGI:1913894
>interaction	Pde6b	Aprt	10090.ENSMUSP00000031456	10090.ENSMUSP00000006764	0	0	0	0	0	0	0.9	0.046	0.9	>node 1 information	Pde6b	ENSMUSG00000029491	1.94262	0.344584	1.1436	1.39737	0.252	0.352137	5.63758	Up	MGI:97525				>node 2 information	Aprt	ENSMUSG00000006589	65.9957	46.4001	56.1979	0.348689	0.956	0.333347	1.42232	Up	MGI:88061
>interaction	Rlim	Fbxo2	10090.ENSMUSP00000070662	10090.ENSMUSP00000037377	0	0	0	0	0	0	0.9	0	0.9	>node 1 information	Rlim	ENSMUSG00000056537	18.0654	30.5123	24.2889	0.512453	0.761	0.389977	-1.68899	Down	MGI:1342291				>node 2 information	Fbxo2	ENSMUSG00000041556	5.71803	2.21126	3.96464	0.88451	0.374	0.330807	2.58587	Up	MGI:2446216	cell proliferation
>interaction	Rasa1	Mras	10090.ENSMUSP00000105179	10090.ENSMUSP00000035045	0	0	0	0	0.051	0.209	0.834	0.294	0.9	>node 1 information	Rasa1	ENSMUSG00000021549	28.7617	40.4315	34.5966	0.337311	0.86	0.290087	-1.40574	Down	MGI:97860	cell proliferation			>node 2 information	Mras	ENSMUSG00000032470	16.7019	9.97083	13.3364	0.504715	0.596	0.30081	1.67508	Up	MGI:1100856
>interaction	Nt5e	Cmpk1	10090.ENSMUSP00000034992	10090.ENSMUSP00000030491	0	0	0	0	0.042	0	0.9	0.046	0.9	>node 1 information	Nt5e	ENSMUSG00000032420	24.2773	34.4179	29.3476	0.345534	0.814	0.281265	-1.4177	Down	MGI:99782				>node 2 information	Cmpk1	ENSMUSG00000028719	34.4237	55.1941	44.8089	0.463533	0.919	0.425987	-1.60337	Down	MGI:1913838
>interaction	Dvl2	M6pr	10090.ENSMUSP00000019362	10090.ENSMUSP00000007602	0	0	0	0	0	0	0.9	0	0.9	>node 1 information	Dvl2	ENSMUSG00000020888	54.7571	39.3269	47.042	0.328009	0.93	0.305048	1.39236	Up	MGI:106613	cell proliferation			>node 2 information	M6pr	ENSMUSG00000007458	16.8481	34.6051	25.7266	0.690219	0.777	0.536301	-2.05395	Down	MGI:96904
>interaction	Pla2g5	Pafah1b1	10090.ENSMUSP00000030524	10090.ENSMUSP00000021091	0	0	0	0	0.05	0	0.9	0	0.9	>node 1 information	Pla2g5	ENSMUSG00000041193	23.7082	15.2927	19.5005	0.431554	0.697	0.300793	1.5503	Up	MGI:101899				>node 2 information	Pafah1b1	ENSMUSG00000020745	37.7155	55.4333	46.5744	0.380419	0.928	0.353029	-1.46978	Down	MGI:109520	cell proliferation;cell differentiation	abnormal male fertility
>interaction	Csnk1e	Nde1	10090.ENSMUSP00000113341	10090.ENSMUSP00000023359	0	0	0	0	0.044	0	0.9	0	0.9	>node 1 information	Csnk1e	ENSMUSG00000022433	60.3353	41.6457	50.9905	0.366531	0.943	0.345639	1.44878	Up	MGI:1351660				>node 2 information	Nde1	ENSMUSG00000022678	31.929	21.2906	26.6098	0.399793	0.786	0.314237	1.49968	Up	MGI:1914453	cell proliferation;cell differentiation
>interaction	Gh	Skp1a	10090.ENSMUSP00000099360	10090.ENSMUSP00000038744	0	0	0	0	0	0	0.9	0	0.9	>node 1 information	Gh	ENSMUSG00000020713	1.46999	0.373976	0.921983	1.18876	0.233	0.27698	3.93071	Up	MGI:95707	cell proliferation;cell differentiation	abnormal male fertility		>node 2 information	Skp1a	ENSMUSG00000036309	50.0088	80.2426	65.1257	0.464238	0.972	0.451239	-1.60457	Down	MGI:103575
>interaction	Trappc2	Tgfa	10090.ENSMUSP00000107813	10090.ENSMUSP00000032066	0	0	0	0	0	0	0.9	0	0.9	>node 1 information	Trappc2	ENSMUSG00000079317	23.2601	35.3851	29.3226	0.413504	0.813	0.336178	-1.52128	Down	MGI:1913476				>node 2 information	Tgfa	ENSMUSG00000029999	2.85877	1.06443	1.9616	0.914733	0.299	0.273505	2.68573	Up	MGI:98724	cell proliferation
>interaction	Nt5c3	Gmps	10090.ENSMUSP00000031793	10090.ENSMUSP00000029405	0	0	0	0	0	0	0.9	0	0.9	>node 1 information	Nt5c3	ENSMUSG00000029780	26.1975	39.1759	32.6867	0.397054	0.844	0.335114	-1.49541	Down	MGI:1927186				>node 2 information	Gmps	ENSMUSG00000027823	30.2407	41.7003	35.9705	0.318583	0.871	0.277486	-1.37895	Down	MGI:2448526
>interaction	Cenpk	Pafah1b1	10090.ENSMUSP00000022227	10090.ENSMUSP00000021091	0	0	0	0	0	0	0.9	0	0.9	>node 1 information	Cenpk	ENSMUSG00000021714	9.95195	16.0237	12.9878	0.467496	0.588	0.274887	-1.61011	Down	MGI:1926210				>node 2 information	Pafah1b1	ENSMUSG00000020745	37.7155	55.4333	46.5744	0.380419	0.928	0.353029	-1.46978	Down	MGI:109520	cell proliferation;cell differentiation	abnormal male fertility
>interaction	Tfrc	Dvl2	10090.ENSMUSP00000023486	10090.ENSMUSP00000019362	0	0	0	0	0	0	0.9	0	0.9	>node 1 information	Tfrc	ENSMUSG00000022797	25.1625	45.0408	35.1016	0.566307	0.865	0.489855	-1.79	Down	MGI:98822	cell proliferation;cell differentiation			>node 2 information	Dvl2	ENSMUSG00000020888	54.7571	39.3269	47.042	0.328009	0.93	0.305048	1.39236	Up	MGI:106613	cell proliferation
>interaction	Rlim	Fbxl3	10090.ENSMUSP00000070662	10090.ENSMUSP00000022720	0	0	0	0	0	0	0.9	0	0.9	>node 1 information	Rlim	ENSMUSG00000056537	18.0654	30.5123	24.2889	0.512453	0.761	0.389977	-1.68899	Down	MGI:1342291				>node 2 information	Fbxl3	ENSMUSG00000022124	19.264	29.4556	24.3598	0.418378	0.763	0.319222	-1.52905	Down	MGI:1354702
>interaction	Rock1	Shb	10090.ENSMUSP00000069549	10090.ENSMUSP00000060433	0	0	0	0	0	0	0.9	0	0.9	>node 1 information	Rock1	ENSMUSG00000024290	18.0534	29.2585	23.656	0.473669	0.752	0.356199	-1.62066	Down	MGI:107927	cell differentiation			>node 2 information	Shb	ENSMUSG00000044813	32.5043	22.9053	27.7048	0.346474	0.798	0.276486	1.41907	Up	MGI:98294	cell proliferation;cell differentiation
>interaction	Elavl2	Phf5a	10090.ENSMUSP00000099863	10090.ENSMUSP00000023117	0	0	0	0	0.044	0	0.9	0	0.9	>node 1 information	Elavl2	ENSMUSG00000008489	17.0204	26.6068	21.8136	0.439469	0.73	0.320812	-1.56323	Down	MGI:1100887				>node 2 information	Phf5a	ENSMUSG00000061360	48.8673	67.1986	58.0329	0.315877	0.961	0.303558	-1.37512	Down	MGI:2156864
>interaction	Nt5c3	Aprt	10090.ENSMUSP00000031793	10090.ENSMUSP00000006764	0	0	0	0	0	0	0.9	0	0.9	>node 1 information	Nt5c3	ENSMUSG00000029780	26.1975	39.1759	32.6867	0.397054	0.844	0.335114	-1.49541	Down	MGI:1927186				>node 2 information	Aprt	ENSMUSG00000006589	65.9957	46.4001	56.1979	0.348689	0.956	0.333347	1.42232	Up	MGI:88061
>interaction	Gpr45	Ramp1	10090.ENSMUSP00000110409	10090.ENSMUSP00000095253	0	0	0	0	0	0	0.9	0	0.9	>node 1 information	Gpr45	ENSMUSG00000041907	2.82254	0.699284	1.76091	1.20577	0.288	0.347262	4.03633	Up	MGI:2135882				>node 2 information	Ramp1	ENSMUSG00000034353	6.54412	2.92343	4.73377	0.764863	0.396	0.302886	2.23851	Up	MGI:1858418
>interaction	Arpc5	Tfrc	10090.ENSMUSP00000076933	10090.ENSMUSP00000023486	0	0	0	0	0	0	0.9	0.043	0.9	>node 1 information	Arpc5	ENSMUSG00000008475	22.2541	35.4329	28.8435	0.456908	0.809	0.369639	-1.5922	Down	MGI:1915021				>node 2 information	Tfrc	ENSMUSG00000022797	25.1625	45.0408	35.1016	0.566307	0.865	0.489855	-1.79	Down	MGI:98822	cell proliferation;cell differentiation
>interaction	Elavl2	Nudt21	10090.ENSMUSP00000099863	10090.ENSMUSP00000034204	0	0	0	0	0	0	0.9	0	0.9	>node 1 information	Elavl2	ENSMUSG00000008489	17.0204	26.6068	21.8136	0.439469	0.73	0.320812	-1.56323	Down	MGI:1100887				>node 2 information	Nudt21	ENSMUSG00000031754	3.47487	8.94399	6.20943	0.880776	0.434	0.382257	-2.57391	Down	MGI:1915469
>interaction	Csnk1e	Nphp4	10090.ENSMUSP00000113341	10090.ENSMUSP00000049920	0	0	0	0	0	0	0.9	0	0.9	>node 1 information	Csnk1e	ENSMUSG00000022433	60.3353	41.6457	50.9905	0.366531	0.943	0.345639	1.44878	Up	MGI:1351660				>node 2 information	Nphp4	ENSMUSG00000039577	15.0623	9.15151	12.1069	0.488216	0.572	0.27926	1.64588	Up	MGI:2384210	cell differentiation	abnormal male fertility
>interaction	Nt5e	Pde4c	10090.ENSMUSP00000034992	10090.ENSMUSP00000034307	0	0	0	0	0	0	0.9	0	0.9	>node 1 information	Nt5e	ENSMUSG00000032420	24.2773	34.4179	29.3476	0.345534	0.814	0.281265	-1.4177	Down	MGI:99782				>node 2 information	Pde4c	ENSMUSG00000031842	10.8906	5.99285	8.44172	0.580184	0.488	0.28313	1.81727	Up	MGI:99556
>interaction	Elavl2	Snrpd2	10090.ENSMUSP00000099863	10090.ENSMUSP00000037597	0	0	0	0	0	0.047	0.9	0	0.9	>node 1 information	Elavl2	ENSMUSG00000008489	17.0204	26.6068	21.8136	0.439469	0.73	0.320812	-1.56323	Down	MGI:1100887				>node 2 information	Snrpd2	ENSMUSG00000040824	48.1126	97.5585	72.8355	0.67887	0.981	0.665972	-2.02771	Down	MGI:98345
>interaction	Col13a1	Serpinh1	10090.ENSMUSP00000101094	10090.ENSMUSP00000091706	0	0	0	0	0.05	0	0.9	0	0.9	>node 1 information	Col13a1	ENSMUSG00000058806	4.2817	1.52327	2.90248	0.950368	0.338	0.321225	2.81086	Up	MGI:1277201	cell differentiation			>node 2 information	Serpinh1	ENSMUSG00000070436	44.0546	21.6151	32.8349	0.683405	0.846	0.578161	2.03814	Up	MGI:88283	cell differentiation
>interaction	Uba6	Fbxl3	10090.ENSMUSP00000035328	10090.ENSMUSP00000022720	0	0	0	0	0	0	0.9	0	0.9	>node 1 information	Uba6	ENSMUSG00000035898	16.5199	28.092	22.3059	0.51879	0.736	0.381829	-1.70049	Down	MGI:1913894				>node 2 information	Fbxl3	ENSMUSG00000022124	19.264	29.4556	24.3598	0.418378	0.763	0.319222	-1.52905	Down	MGI:1354702
>interaction	Cul3	Dzip1	10090.ENSMUSP00000130738	10090.ENSMUSP00000004055	0	0	0	0	0	0	0.9	0	0.9	>node 1 information	Cul3	ENSMUSG00000004364	46.4411	68.4015	57.4213	0.382443	0.959	0.366763	-1.47287	Down	MGI:1347360	cell differentiation			>node 2 information	Dzip1	ENSMUSG00000042156	9.5283	5.06484	7.29657	0.61172	0.463	0.283226	1.88126	Up	MGI:1914311	cell differentiation
>interaction	Pde6b	Gmps	10090.ENSMUSP00000031456	10090.ENSMUSP00000029405	0	0	0	0	0	0	0.9	0.043	0.9	>node 1 information	Pde6b	ENSMUSG00000029491	1.94262	0.344584	1.1436	1.39737	0.252	0.352137	5.63758	Up	MGI:97525				>node 2 information	Gmps	ENSMUSG00000027823	30.2407	41.7003	35.9705	0.318583	0.871	0.277486	-1.37895	Down	MGI:2448526
>interaction	Bin1	Dvl2	10090.ENSMUSP00000025239	10090.ENSMUSP00000019362	0	0	0	0	0	0	0.9	0	0.9	>node 1 information	Bin1	ENSMUSG00000024381	19.4043	10.6341	15.0192	0.583933	0.628	0.36671	1.82472	Up	MGI:108092	cell differentiation			>node 2 information	Dvl2	ENSMUSG00000020888	54.7571	39.3269	47.042	0.328009	0.93	0.305048	1.39236	Up	MGI:106613	cell proliferation
>interaction	Exosc9	Rpl19	10090.ENSMUSP00000029269	10090.ENSMUSP00000017548	0	0	0	0	0	0	0.9	0	0.9	>node 1 information	Exosc9	ENSMUSG00000027714	15.2009	22.659	18.93	0.393984	0.687	0.270667	-1.49064	Down	MGI:1355319				>node 2 information	Rpl19	ENSMUSG00000017404	16.2771	4.48338	10.3802	1.13617	0.534	0.606715	3.63054	Up	MGI:98020
>interaction	Lypla2	Gpcpd1	10090.ENSMUSP00000064204	10090.ENSMUSP00000062221	0	0	0	0	0.05	0	0.9	0	0.9	>node 1 information	Lypla2	ENSMUSG00000028670	47.0256	32.4128	39.7192	0.367903	0.894	0.328905	1.45083	Up	MGI:1347000				>node 2 information	Gpcpd1	ENSMUSG00000027346	14.2428	21.464	17.8534	0.404472	0.671	0.271401	-1.50701	Down	MGI:104898
>interaction	Birc2	Psmd6	10090.ENSMUSP00000091422	10090.ENSMUSP00000022256	0	0	0	0	0	0	0.9	0	0.9	>node 1 information	Birc2	ENSMUSG00000057367	26.647	38.5157	32.5814	0.364279	0.844	0.307451	-1.4454	Down	MGI:1197009				>node 2 information	Psmd6	ENSMUSG00000021737	40.3639	54.0615	47.2127	0.290125	0.93	0.269817	-1.33935	Down	MGI:1913663
>interaction	Sycp2	Hist1h2af	10090.ENSMUSP00000079909	10090.ENSMUSP00000072989	0	0	0	0	0	0	0.9	0	0.9	>node 1 information	Sycp2	ENSMUSG00000060445	10.1192	23.1841	16.6517	0.784601	0.653	0.512344	-2.2911	Down	MGI:1933281		abnormal male fertility		>node 2 information	Hist1h2af	ENSMUSG00000061991	3.23177	0.591375	1.91157	1.38127	0.297	0.410237	5.46484	Up	MGI:2448309
>interaction	Arpc5	Dvl2	10090.ENSMUSP00000076933	10090.ENSMUSP00000019362	0	0	0	0	0	0	0.9	0	0.9	>node 1 information	Arpc5	ENSMUSG00000008475	22.2541	35.4329	28.8435	0.456908	0.809	0.369639	-1.5922	Down	MGI:1915021				>node 2 information	Dvl2	ENSMUSG00000020888	54.7571	39.3269	47.042	0.328009	0.93	0.305048	1.39236	Up	MGI:106613	cell proliferation
>interaction	Ube2c	Top2a	10090.ENSMUSP00000085581	10090.ENSMUSP00000068896	0	0	0	0	0.853	0	0	0.351	0.9	>node 1 information	Ube2c	ENSMUSG00000001403	47.8028	33.7011	40.752	0.346037	0.9	0.311434	1.41843	Up	MGI:1915862				>node 2 information	Top2a	ENSMUSG00000020914	47.0462	64.8343	55.9402	0.317984	0.955	0.303675	-1.3781	Down	MGI:98790	cell differentiation
>interaction	Tubg1	Tubg2	10090.ENSMUSP00000048036	10090.ENSMUSP00000045901	0	0	0	0.99	0	0	0.9	0.464	0.9	>node 1 information	Tubg1	ENSMUSG00000035198	60.2912	42.6845	51.4879	0.341958	0.945	0.323151	1.41248	Up	MGI:101834				>node 2 information	Tubg2	ENSMUSG00000045007	8.58332	3.79528	6.1893	0.7736	0.433	0.334969	2.26158	Up	MGI:2144208
>interaction	Gnai1	Cxcl1	10090.ENSMUSP00000074259	10090.ENSMUSP00000031327	0	0	0	0	0	0	0.9	0	0.9	>node 1 information	Gnai1	ENSMUSG00000057614	8.8623	19.5502	14.2063	0.752338	0.612	0.460431	-2.206	Down	MGI:95771				>node 2 information	Cxcl1	ENSMUSG00000029380	1.1573	0.0785125	0.617906	1.74588	0.199	0.347429	14.7403	Up	MGI:108068	cell proliferation
>interaction	Ddb2	Mnat1	10090.ENSMUSP00000028696	10090.ENSMUSP00000021523	0	0	0	0	0	0	0.9	0	0.9	>node 1 information	Ddb2	ENSMUSG00000002109	8.51632	14.176	11.3462	0.498819	0.556	0.277343	-1.66457	Down	MGI:1355314				>node 2 information	Mnat1	ENSMUSG00000021103	15.9166	6.77796	11.3473	0.80536	0.556	0.44778	2.34829	Up	MGI:106207	cell proliferation	abnormal spermatogenesis
>interaction	Hnrnph1	Phf5a	10090.ENSMUSP00000070503	10090.ENSMUSP00000023117	0	0	0	0	0	0	0.9	0	0.9	>node 1 information	Hnrnph1	ENSMUSG00000007850	59.2193	84.1137	71.6665	0.347365	0.98	0.340417	-1.42038	Down	MGI:1891925				>node 2 information	Phf5a	ENSMUSG00000061360	48.8673	67.1986	58.0329	0.315877	0.961	0.303558	-1.37512	Down	MGI:2156864
>interaction	Pmf1	Taok1	10090.ENSMUSP00000062420	10090.ENSMUSP00000017435	0	0	0	0	0	0	0.9	0	0.9	>node 1 information	Pmf1	ENSMUSG00000028066	64.6266	45.8186	55.2226	0.340585	0.954	0.324918	1.41049	Up	MGI:1914287				>node 2 information	Taok1	ENSMUSG00000017291	17.0409	26.5511	21.796	0.436328	0.729	0.318083	-1.55808	Down	MGI:1914490
>interaction	Sct	Gpr45	10090.ENSMUSP00000128729	10090.ENSMUSP00000110409	0	0	0	0	0	0	0.9	0	0.9	>node 1 information	Sct	ENSMUSG00000038580	3.12958	0.172299	1.65094	1.79127	0.282	0.505139	18.1637	Up	MGI:99466				>node 2 information	Gpr45	ENSMUSG00000041907	2.82254	0.699284	1.76091	1.20577	0.288	0.347262	4.03633	Up	MGI:2135882
>interaction	Fam3c	Tmsb4x	10090.ENSMUSP00000127709	10090.ENSMUSP00000107795	0	0	0	0	0	0	0.9	0	0.9	>node 1 information	Fam3c	ENSMUSG00000029672	22.1138	32.8607	27.4872	0.390978	0.796	0.311218	-1.48598	Down	MGI:107892				>node 2 information	Tmsb4x	ENSMUSG00000049775	52.1334	91.3732	71.7533	0.546871	0.98	0.535934	-1.75268	Down	MGI:99510	cell differentiation
>interaction	Hist1h2aa	Mbd6	10090.ENSMUSP00000072227	10090.ENSMUSP00000026476	0	0	0	0	0	0	0.9	0	0.9	>node 1 information	Hist1h2aa	ENSMUSG00000060081	0.22077	1.48228	0.851525	1.48147	0.226	0.334813	-6.71414	Down	MGI:2448285				>node 2 information	Mbd6	ENSMUSG00000025409	48.9546	35.5364	42.2455	0.317624	0.907	0.288085	1.37759	Up	MGI:106378
>interaction	Cxcl1	Drd4	10090.ENSMUSP00000031327	10090.ENSMUSP00000026569	0	0	0	0	0	0	0.9	0	0.9	>node 1 information	Cxcl1	ENSMUSG00000029380	1.1573	0.0785125	0.617906	1.74588	0.199	0.347429	14.7403	Up	MGI:108068	cell proliferation			>node 2 information	Drd4	ENSMUSG00000025496	9.8926	26.0747	17.9837	0.899823	0.673	0.605581	-2.63578	Down	MGI:94926
>interaction	Impdh1	Nt5c3	10090.ENSMUSP00000077289	10090.ENSMUSP00000031793	0	0	0	0	0.05	0	0.9	0	0.9	>node 1 information	Impdh1	ENSMUSG00000003500	31.429	22.2511	26.8401	0.341948	0.789	0.269797	1.41247	Up	MGI:96567	cell proliferation			>node 2 information	Nt5c3	ENSMUSG00000029780	26.1975	39.1759	32.6867	0.397054	0.844	0.335114	-1.49541	Down	MGI:1927186
>interaction	Npw	Gnai1	10090.ENSMUSP00000093200	10090.ENSMUSP00000074259	0	0	0	0	0	0	0.9	0	0.9	>node 1 information	Npw	ENSMUSG00000071230	6.14933	2.88753	4.51843	0.721888	0.39	0.281536	2.12962	Up	MGI:2685781				>node 2 information	Gnai1	ENSMUSG00000057614	8.8623	19.5502	14.2063	0.752338	0.612	0.460431	-2.206	Down	MGI:95771
>interaction	Gsta4	Ggt7	10090.ENSMUSP00000034903	10090.ENSMUSP00000029131	0	0	0	0	0	0	0.9	0.045	0.9	>node 1 information	Gsta4	ENSMUSG00000032348	74.9758	99.7241	87.35	0.283324	0.99	0.28049	-1.33008	Down	MGI:1309515				>node 2 information	Ggt7	ENSMUSG00000027603	8.76308	4.19023	6.47666	0.706051	0.44	0.310663	2.09131	Up	MGI:1913385
>interaction	Arpc3	Tfrc	10090.ENSMUSP00000099584	10090.ENSMUSP00000023486	0	0	0	0	0	0	0.9	0	0.9	>node 1 information	Arpc3	ENSMUSG00000029465	57.8603	41.9539	49.9071	0.31872	0.939	0.299278	1.37914	Up	MGI:1928375				>node 2 information	Tfrc	ENSMUSG00000022797	25.1625	45.0408	35.1016	0.566307	0.865	0.489855	-1.79	Down	MGI:98822	cell proliferation;cell differentiation
>interaction	Npw	Pf4	10090.ENSMUSP00000093200	10090.ENSMUSP00000031320	0	0	0	0	0	0	0.9	0	0.9	>node 1 information	Npw	ENSMUSG00000071230	6.14933	2.88753	4.51843	0.721888	0.39	0.281536	2.12962	Up	MGI:2685781				>node 2 information	Pf4	ENSMUSG00000029373	5.26837	1.96588	3.61713	0.913015	0.362	0.330511	2.6799	Up	MGI:1888711	cell proliferation;cell differentiation
>interaction	Bin1	M6pr	10090.ENSMUSP00000025239	10090.ENSMUSP00000007602	0	0	0	0	0	0	0.9	0	0.9	>node 1 information	Bin1	ENSMUSG00000024381	19.4043	10.6341	15.0192	0.583933	0.628	0.36671	1.82472	Up	MGI:108092	cell differentiation			>node 2 information	M6pr	ENSMUSG00000007458	16.8481	34.6051	25.7266	0.690219	0.777	0.536301	-2.05395	Down	MGI:96904
>interaction	Tgfa	Sec16b	10090.ENSMUSP00000032066	10090.ENSMUSP00000027881	0	0	0	0	0	0	0.9	0	0.9	>node 1 information	Tgfa	ENSMUSG00000029999	2.85877	1.06443	1.9616	0.914733	0.299	0.273505	2.68573	Up	MGI:98724	cell proliferation			>node 2 information	Sec16b	ENSMUSG00000026589	1.97795	0.0502615	1.01411	1.90088	0.242	0.460012	39.3532	Up	MGI:2148802
>interaction	Npw	Cxcl1	10090.ENSMUSP00000093200	10090.ENSMUSP00000031327	0	0	0	0	0	0	0.9	0	0.9	>node 1 information	Npw	ENSMUSG00000071230	6.14933	2.88753	4.51843	0.721888	0.39	0.281536	2.12962	Up	MGI:2685781				>node 2 information	Cxcl1	ENSMUSG00000029380	1.1573	0.0785125	0.617906	1.74588	0.199	0.347429	14.7403	Up	MGI:108068	cell proliferation
>interaction	Kdm1b	Mbd6	10090.ENSMUSP00000038373	10090.ENSMUSP00000026476	0	0	0	0	0	0	0.9	0	0.9	>node 1 information	Kdm1b	ENSMUSG00000038080	21.2789	36.8917	29.0853	0.536794	0.811	0.43534	-1.73372	Down	MGI:2145261				>node 2 information	Mbd6	ENSMUSG00000025409	48.9546	35.5364	42.2455	0.317624	0.907	0.288085	1.37759	Up	MGI:106378
>interaction	Trappc2	Sec16b	10090.ENSMUSP00000107813	10090.ENSMUSP00000027881	0	0	0	0	0	0	0.9	0	0.9	>node 1 information	Trappc2	ENSMUSG00000079317	23.2601	35.3851	29.3226	0.413504	0.813	0.336178	-1.52128	Down	MGI:1913476				>node 2 information	Sec16b	ENSMUSG00000026589	1.97795	0.0502615	1.01411	1.90088	0.242	0.460012	39.3532	Up	MGI:2148802
>interaction	Ncor2	Med21	10090.ENSMUSP00000083250	10090.ENSMUSP00000032429	0	0	0	0	0	0	0.9	0	0.9	>node 1 information	Ncor2	ENSMUSG00000029478	77.2072	56.488	66.8476	0.309947	0.974	0.301888	1.36679	Up	MGI:1337080	cell proliferation;cell differentiation			>node 2 information	Med21	ENSMUSG00000030291	33.4806	53.5695	43.5251	0.461548	0.913	0.421393	-1.60002	Down	MGI:1347064
>interaction	Pde4c	Aprt	10090.ENSMUSP00000034307	10090.ENSMUSP00000006764	0	0	0	0	0	0	0.9	0	0.9	>node 1 information	Pde4c	ENSMUSG00000031842	10.8906	5.99285	8.44172	0.580184	0.488	0.28313	1.81727	Up	MGI:99556				>node 2 information	Aprt	ENSMUSG00000006589	65.9957	46.4001	56.1979	0.348689	0.956	0.333347	1.42232	Up	MGI:88061
>interaction	Pde4c	Nt5c3	10090.ENSMUSP00000034307	10090.ENSMUSP00000031793	0	0	0	0	0	0	0.9	0	0.9	>node 1 information	Pde4c	ENSMUSG00000031842	10.8906	5.99285	8.44172	0.580184	0.488	0.28313	1.81727	Up	MGI:99556				>node 2 information	Nt5c3	ENSMUSG00000029780	26.1975	39.1759	32.6867	0.397054	0.844	0.335114	-1.49541	Down	MGI:1927186
>interaction	Fam3c	Serping1	10090.ENSMUSP00000127709	10090.ENSMUSP00000023994	0	0	0	0	0	0	0.9	0	0.9	>node 1 information	Fam3c	ENSMUSG00000029672	22.1138	32.8607	27.4872	0.390978	0.796	0.311218	-1.48598	Down	MGI:107892				>node 2 information	Serping1	ENSMUSG00000023224	2.76028	0.941322	1.8508	0.982795	0.294	0.288942	2.93234	Up	MGI:894696
>interaction	Iqcb1	Nde1	10090.ENSMUSP00000023535	10090.ENSMUSP00000023359	0	0	0	0	0	0	0.9	0	0.9	>node 1 information	Iqcb1	ENSMUSG00000022837	19.621	31.442	25.5315	0.462997	0.775	0.358822	-1.60247	Down	MGI:2443764	cell differentiation			>node 2 information	Nde1	ENSMUSG00000022678	31.929	21.2906	26.6098	0.399793	0.786	0.314237	1.49968	Up	MGI:1914453	cell proliferation;cell differentiation
>interaction	Shb	Nckap1	10090.ENSMUSP00000060433	10090.ENSMUSP00000028386	0	0	0	0	0	0	0.9	0	0.9	>node 1 information	Shb	ENSMUSG00000044813	32.5043	22.9053	27.7048	0.346474	0.798	0.276486	1.41907	Up	MGI:98294	cell proliferation;cell differentiation			>node 2 information	Nckap1	ENSMUSG00000027002	39.1061	57.3872	48.2467	0.378909	0.934	0.353901	-1.46747	Down	MGI:1355333
>interaction	Nt5e	Adss	10090.ENSMUSP00000034992	10090.ENSMUSP00000016105	0	0	0	0	0.049	0	0.9	0	0.9	>node 1 information	Nt5e	ENSMUSG00000032420	24.2773	34.4179	29.3476	0.345534	0.814	0.281265	-1.4177	Down	MGI:99782				>node 2 information	Adss	ENSMUSG00000015961	43.4678	60.8084	52.1381	0.33259	0.946	0.31463	-1.39893	Down	MGI:87948
>interaction	Fbxo2	Fbxl3	10090.ENSMUSP00000037377	10090.ENSMUSP00000022720	0	0	0	0	0	0	0.9	0	0.9	>node 1 information	Fbxo2	ENSMUSG00000041556	5.71803	2.21126	3.96464	0.88451	0.374	0.330807	2.58587	Up	MGI:2446216	cell proliferation			>node 2 information	Fbxl3	ENSMUSG00000022124	19.264	29.4556	24.3598	0.418378	0.763	0.319222	-1.52905	Down	MGI:1354702
>interaction	Ptrf	Mnat1	10090.ENSMUSP00000058321	10090.ENSMUSP00000021523	0	0	0	0	0	0	0.9	0	0.9	>node 1 information	Ptrf	ENSMUSG00000004044	24.1486	16.4629	20.3057	0.378499	0.709	0.268356	1.46685	Up	MGI:1277968				>node 2 information	Mnat1	ENSMUSG00000021103	15.9166	6.77796	11.3473	0.80536	0.556	0.44778	2.34829	Up	MGI:106207	cell proliferation	abnormal spermatogenesis
>interaction	Arpc3	Dvl2	10090.ENSMUSP00000099584	10090.ENSMUSP00000019362	0	0	0	0	0	0	0.9	0	0.9	>node 1 information	Arpc3	ENSMUSG00000029465	57.8603	41.9539	49.9071	0.31872	0.939	0.299278	1.37914	Up	MGI:1928375				>node 2 information	Dvl2	ENSMUSG00000020888	54.7571	39.3269	47.042	0.328009	0.93	0.305048	1.39236	Up	MGI:106613	cell proliferation
>interaction	Arpc5	Bin1	10090.ENSMUSP00000076933	10090.ENSMUSP00000025239	0	0	0	0	0	0	0.9	0	0.9	>node 1 information	Arpc5	ENSMUSG00000008475	22.2541	35.4329	28.8435	0.456908	0.809	0.369639	-1.5922	Down	MGI:1915021				>node 2 information	Bin1	ENSMUSG00000024381	19.4043	10.6341	15.0192	0.583933	0.628	0.36671	1.82472	Up	MGI:108092	cell differentiation
>interaction	Bin1	Tfrc	10090.ENSMUSP00000025239	10090.ENSMUSP00000023486	0	0	0	0	0	0	0.9	0.042	0.9	>node 1 information	Bin1	ENSMUSG00000024381	19.4043	10.6341	15.0192	0.583933	0.628	0.36671	1.82472	Up	MGI:108092	cell differentiation			>node 2 information	Tfrc	ENSMUSG00000022797	25.1625	45.0408	35.1016	0.566307	0.865	0.489855	-1.79	Down	MGI:98822	cell proliferation;cell differentiation
>interaction	Ap3s1	Tfrc	10090.ENSMUSP00000025357	10090.ENSMUSP00000023486	0	0	0	0	0	0	0.9	0	0.9	>node 1 information	Ap3s1	ENSMUSG00000024480	14.149	32.84	23.4945	0.795548	0.75	0.596661	-2.32101	Down	MGI:1337062				>node 2 information	Tfrc	ENSMUSG00000022797	25.1625	45.0408	35.1016	0.566307	0.865	0.489855	-1.79	Down	MGI:98822	cell proliferation;cell differentiation
>interaction	Arpc3	Bin1	10090.ENSMUSP00000099584	10090.ENSMUSP00000025239	0	0	0	0	0	0	0.9	0	0.9	>node 1 information	Arpc3	ENSMUSG00000029465	57.8603	41.9539	49.9071	0.31872	0.939	0.299278	1.37914	Up	MGI:1928375				>node 2 information	Bin1	ENSMUSG00000024381	19.4043	10.6341	15.0192	0.583933	0.628	0.36671	1.82472	Up	MGI:108092	cell differentiation
>interaction	Ccne2	Psmd6	10090.ENSMUSP00000103960	10090.ENSMUSP00000022256	0	0	0	0	0	0	0.9	0	0.9	>node 1 information	Ccne2	ENSMUSG00000028212	9.17713	18.8589	14.018	0.690666	0.609	0.420616	-2.05499	Down	MGI:1329034		abnormal male fertility;abnormal spermatogenesis		>node 2 information	Psmd6	ENSMUSG00000021737	40.3639	54.0615	47.2127	0.290125	0.93	0.269817	-1.33935	Down	MGI:1913663
>interaction	Hist1h2af	Sycp1	10090.ENSMUSP00000072989	10090.ENSMUSP00000029448	0	0	0	0	0	0	0.9	0	0.9	>node 1 information	Hist1h2af	ENSMUSG00000061991	3.23177	0.591375	1.91157	1.38127	0.297	0.410237	5.46484	Up	MGI:2448309				>node 2 information	Sycp1	ENSMUSG00000027855	19.1842	41.0587	30.1214	0.72621	0.821	0.596218	-2.14024	Down	MGI:105931	cell differentiation	abnormal male fertility
>interaction	Myh11	Myh9	10090.ENSMUSP00000087756	10090.ENSMUSP00000016771	0	0	0	0.983	0	0	0.9	0.315	0.9	>node 1 information	Myh11	ENSMUSG00000018830	3.23215	0.928521	2.08034	1.10734	0.305	0.337737	3.48097	Up	MGI:102643	cell differentiation			>node 2 information	Myh9	ENSMUSG00000022443	52.4866	38.5127	45.4997	0.307121	0.922	0.283166	1.36284	Up	MGI:107717	cell differentiation
>interaction	Lpar3	Pf4	10090.ENSMUSP00000037712	10090.ENSMUSP00000031320	0	0	0	0	0	0	0.9	0	0.9	>node 1 information	Lpar3	ENSMUSG00000036832	16.1782	34.0462	25.1122	0.711527	0.771	0.548587	-2.10445	Down	MGI:1929469	cell differentiation			>node 2 information	Pf4	ENSMUSG00000029373	5.26837	1.96588	3.61713	0.913015	0.362	0.330511	2.6799	Up	MGI:1888711	cell proliferation;cell differentiation
>interaction	Fbxl3	Wsb1	10090.ENSMUSP00000022720	10090.ENSMUSP00000017821	0	0	0	0	0	0	0.9	0	0.9	>node 1 information	Fbxl3	ENSMUSG00000022124	19.264	29.4556	24.3598	0.418378	0.763	0.319222	-1.52905	Down	MGI:1354702				>node 2 information	Wsb1	ENSMUSG00000017677	35.5432	50.3479	42.9455	0.344732	0.911	0.314051	-1.41653	Down	MGI:1926139
>interaction	Tmsb4x	Serping1	10090.ENSMUSP00000107795	10090.ENSMUSP00000023994	0	0	0	0	0	0	0.9	0	0.9	>node 1 information	Tmsb4x	ENSMUSG00000049775	52.1334	91.3732	71.7533	0.546871	0.98	0.535934	-1.75268	Down	MGI:99510	cell differentiation			>node 2 information	Serping1	ENSMUSG00000023224	2.76028	0.941322	1.8508	0.982795	0.294	0.288942	2.93234	Up	MGI:894696
>interaction	Ncor2	Sall1	10090.ENSMUSP00000083250	10090.ENSMUSP00000034090	0	0	0	0	0	0	0.9	0	0.9	>node 1 information	Ncor2	ENSMUSG00000029478	77.2072	56.488	66.8476	0.309947	0.974	0.301888	1.36679	Up	MGI:1337080	cell proliferation;cell differentiation			>node 2 information	Sall1	ENSMUSG00000031665	17.6123	9.3015	13.4569	0.617587	0.597	0.368699	1.89349	Up	MGI:1889585	cell proliferation;cell differentiation
>interaction	Ramp1	Lhcgr	10090.ENSMUSP00000095253	10090.ENSMUSP00000024916	0	0	0	0	0	0	0.9	0	0.9	>node 1 information	Ramp1	ENSMUSG00000034353	6.54412	2.92343	4.73377	0.764863	0.396	0.302886	2.23851	Up	MGI:1858418				>node 2 information	Lhcgr	ENSMUSG00000024107	3.84609	0.8625	2.3543	1.2673	0.317	0.401733	4.45923	Up	MGI:96783	cell differentiation	abnormal male fertility
>interaction	Lpar3	Drd4	10090.ENSMUSP00000037712	10090.ENSMUSP00000026569	0	0	0	0	0	0	0.9	0	0.9	>node 1 information	Lpar3	ENSMUSG00000036832	16.1782	34.0462	25.1122	0.711527	0.771	0.548587	-2.10445	Down	MGI:1929469	cell differentiation			>node 2 information	Drd4	ENSMUSG00000025496	9.8926	26.0747	17.9837	0.899823	0.673	0.605581	-2.63578	Down	MGI:94926
>interaction	Pf4	Drd4	10090.ENSMUSP00000031320	10090.ENSMUSP00000026569	0	0	0	0	0	0	0.9	0	0.9	>node 1 information	Pf4	ENSMUSG00000029373	5.26837	1.96588	3.61713	0.913015	0.362	0.330511	2.6799	Up	MGI:1888711	cell proliferation;cell differentiation			>node 2 information	Drd4	ENSMUSG00000025496	9.8926	26.0747	17.9837	0.899823	0.673	0.605581	-2.63578	Down	MGI:94926
>interaction	Utp18	Ddx56	10090.ENSMUSP00000068103	10090.ENSMUSP00000004507	0	0	0	0	0.899	0	0	0	0.899	>node 1 information	Utp18	ENSMUSG00000054079	19.3802	41.494	30.4371	0.726541	0.824	0.59867	-2.14105	Down	MGI:1923402				>node 2 information	Ddx56	ENSMUSG00000004393	48.5664	33.3119	40.9391	0.372614	0.901	0.335725	1.45793	Up	MGI:1277172	cell differentiation
>interaction	Top2a	Hells	10090.ENSMUSP00000068896	10090.ENSMUSP00000025965	0	0	0	0	0.614	0.418	0.398	0.345	0.899	>node 1 information	Top2a	ENSMUSG00000020914	47.0462	64.8343	55.9402	0.317984	0.955	0.303675	-1.3781	Down	MGI:98790	cell differentiation			>node 2 information	Hells	ENSMUSG00000025001	57.4751	83.9665	70.7208	0.374591	0.979	0.366725	-1.46092	Down	MGI:106209	cell differentiation
>interaction	Jun	Hmox1	10090.ENSMUSP00000054270	10090.ENSMUSP00000005548	0	0	0	0	0.051	0	0.528	0.794	0.899	>node 1 information	Jun	ENSMUSG00000052684	51.1912	37.6828	44.437	0.30399	0.917	0.278759	1.35848	Up	MGI:96646	cell proliferation;cell differentiation			>node 2 information	Hmox1	ENSMUSG00000005413	44.5088	31.5777	38.0433	0.339905	0.884	0.300476	1.4095	Up	MGI:96163	cell proliferation
>interaction	Birc2	Chuk	10090.ENSMUSP00000091422	10090.ENSMUSP00000026217	0	0	0	0	0.132	0.225	0.72	0.529	0.899	>node 1 information	Birc2	ENSMUSG00000057367	26.647	38.5157	32.5814	0.364279	0.844	0.307451	-1.4454	Down	MGI:1197009				>node 2 information	Chuk	ENSMUSG00000025199	19.7253	35.6368	27.681	0.574816	0.798	0.458703	-1.80665	Down	MGI:99484	cell proliferation;cell differentiation
>interaction	Hist1h3e	Asf1a	10090.ENSMUSP00000100739	10090.ENSMUSP00000020004	0	0	0	0	0.097	0.681	0	0.675	0.898	>node 1 information	Hist1h3e	ENSMUSG00000069273	2.38594	0.341943	1.36394	1.4986	0.266	0.398626	6.9776	Up	MGI:2448326				>node 2 information	Asf1a	ENSMUSG00000019857	17.906	39.0871	28.4965	0.743286	0.806	0.599089	-2.18291	Down	MGI:1913653	cell differentiation
>interaction	Ash1l	H3f3b	10090.ENSMUSP00000088451	10090.ENSMUSP00000016703	0	0	0	0	0.053	0.761	0	0.585	0.897	>node 1 information	Ash1l	ENSMUSG00000028053	20.181	29.1935	24.6872	0.365067	0.766	0.279641	-1.44658	Down	MGI:2183158		abnormal male fertility		>node 2 information	H3f3b	ENSMUSG00000016559	60.638	81.5386	71.0883	0.294009	0.979	0.287835	-1.34468	Down	MGI:1101768	cell proliferation;cell differentiation	abnormal male fertility
>interaction	Hist1h2aa	Hdac2	10090.ENSMUSP00000072227	10090.ENSMUSP00000019911	0	0	0	0	0.049	0.178	0.8	0.417	0.896	>node 1 information	Hist1h2aa	ENSMUSG00000060081	0.22077	1.48228	0.851525	1.48147	0.226	0.334813	-6.71414	Down	MGI:2448285				>node 2 information	Hdac2	ENSMUSG00000019777	62.0497	84.1093	73.0795	0.301858	0.981	0.296122	-1.35552	Down	MGI:1097691	cell proliferation;cell differentiation
>interaction	Hist1h3c	Ash1l	10090.ENSMUSP00000089346	10090.ENSMUSP00000088451	0	0	0	0	0.053	0.761	0	0.58	0.896	>node 1 information	Hist1h3c	ENSMUSG00000069310	2.0088	0.542508	1.27565	1.14944	0.26	0.298855	3.7028	Up	MGI:2448320				>node 2 information	Ash1l	ENSMUSG00000028053	20.181	29.1935	24.6872	0.365067	0.766	0.279641	-1.44658	Down	MGI:2183158		abnormal male fertility
>interaction	Ryr1	Atp2a2	10090.ENSMUSP00000137123	10090.ENSMUSP00000031423	0	0	0	0	0.188	0	0	0.874	0.894	>node 1 information	Ryr1	ENSMUSG00000030592	3.63502	1.10367	2.36935	1.06838	0.318	0.339743	3.29358	Up	MGI:99659	cell differentiation			>node 2 information	Atp2a2	ENSMUSG00000029467	38.0411	51.0735	44.5573	0.292486	0.918	0.268502	-1.34259	Down	MGI:88110	cell differentiation
>interaction	Cfl2	Acta2	10090.ENSMUSP00000077262	10090.ENSMUSP00000048218	0	0	0	0	0.1	0.644	0.361	0.543	0.894	>node 1 information	Cfl2	ENSMUSG00000062929	20.2607	33.5658	26.9133	0.49437	0.79	0.390552	-1.65669	Down	MGI:101763	cell differentiation			>node 2 information	Acta2	ENSMUSG00000035783	12.036	6.76842	9.40221	0.560249	0.512	0.286848	1.77826	Up	MGI:87909
>interaction	Jun	Mmp2	10090.ENSMUSP00000054270	10090.ENSMUSP00000034187	0	0	0	0	0.051	0.099	0.528	0.766	0.893	>node 1 information	Jun	ENSMUSG00000052684	51.1912	37.6828	44.437	0.30399	0.917	0.278759	1.35848	Up	MGI:96646	cell proliferation;cell differentiation			>node 2 information	Mmp2	ENSMUSG00000031740	40.2116	13.2712	26.7414	1.00744	0.787	0.792857	3.02999	Up	MGI:97009	cell proliferation;cell differentiation
>interaction	C1qc	Serping1	10090.ENSMUSP00000036747	10090.ENSMUSP00000023994	0	0	0	0	0.289	0	0.8	0.31	0.893	>node 1 information	C1qc	ENSMUSG00000036896	4.75087	1.95749	3.35418	0.832806	0.355	0.295646	2.42702	Up	MGI:88225	cell differentiation			>node 2 information	Serping1	ENSMUSG00000023224	2.76028	0.941322	1.8508	0.982795	0.294	0.288942	2.93234	Up	MGI:894696
>interaction	Dld	Sucla2	10090.ENSMUSP00000106481	10090.ENSMUSP00000022706	0.177	0	0	0	0.616	0.113	0.484	0.369	0.892	>node 1 information	Dld	ENSMUSG00000020664	25.2514	39.3389	32.2951	0.436211	0.841	0.366853	-1.55789	Down	MGI:107450	cell differentiation			>node 2 information	Sucla2	ENSMUSG00000022110	27.9656	47.012	37.4888	0.508056	0.88	0.447089	-1.68107	Down	MGI:1306775
>interaction	C1qb	Serping1	10090.ENSMUSP00000040246	10090.ENSMUSP00000023994	0	0	0	0	0.265	0	0.8	0.328	0.892	>node 1 information	C1qb	ENSMUSG00000036905	5.65767	1.95619	3.80693	0.972301	0.369	0.358779	2.89219	Up	MGI:88224				>node 2 information	Serping1	ENSMUSG00000023224	2.76028	0.941322	1.8508	0.982795	0.294	0.288942	2.93234	Up	MGI:894696
>interaction	Chaf1b	Insig2	10090.ENSMUSP00000023666	10090.ENSMUSP00000003818	0	0	0	0	0.047	0.81	0	0.451	0.891	>node 1 information	Chaf1b	ENSMUSG00000022945	31.8271	18.2411	25.0341	0.5427	0.77	0.417879	1.7448	Up	MGI:1314881				>node 2 information	Insig2	ENSMUSG00000003721	13.9562	24.7834	19.3698	0.558973	0.695	0.388486	-1.7758	Down	MGI:1920249
>interaction	Ar	Hsp90b1	10090.ENSMUSP00000052648	10090.ENSMUSP00000020238	0	0	0	0	0	0.102	0.869	0.15	0.891	>node 1 information	Ar	ENSMUSG00000046532	4.1779	8.24055	6.20922	0.654293	0.434	0.283963	-1.97241	Down	MGI:88064	cell proliferation;cell differentiation	abnormal male fertility;abnormal spermatogenesis		>node 2 information	Hsp90b1	ENSMUSG00000020048	91.776	128.922	110.349	0.336623	0.996	0.335276	-1.40475	Down	MGI:98817
>interaction	Snai1	Twist1	10090.ENSMUSP00000050581	10090.ENSMUSP00000040089	0	0	0	0	0.048	0	0	0.888	0.89	>node 1 information	Snai1	ENSMUSG00000042821	10.7679	5.23635	8.00212	0.69126	0.478	0.330422	2.05638	Up	MGI:98330	cell differentiation			>node 2 information	Twist1	ENSMUSG00000035799	4.40065	1.75283	3.07674	0.860593	0.345	0.296904	2.5106	Up	MGI:98872	cell proliferation;cell differentiation
>interaction	Nmd3	Pwp1	10090.ENSMUSP00000029358	10090.ENSMUSP00000001836	0	0	0	0	0.89	0	0	0	0.89	>node 1 information	Nmd3	ENSMUSG00000027787	38.0929	51.5293	44.8111	0.299845	0.919	0.275558	-1.35273	Down	MGI:2140103				>node 2 information	Pwp1	ENSMUSG00000001785	34.152	47.5857	40.8689	0.328703	0.901	0.296161	-1.39335	Down	MGI:1914735	cell differentiation
>interaction	Hist1h3e	Asf1b	10090.ENSMUSP00000100739	10090.ENSMUSP00000005607	0	0	0	0	0.097	0.681	0	0.651	0.89	>node 1 information	Hist1h3e	ENSMUSG00000069273	2.38594	0.341943	1.36394	1.4986	0.266	0.398626	6.9776	Up	MGI:2448326				>node 2 information	Asf1b	ENSMUSG00000005470	72.1413	101.487	86.8141	0.338029	0.99	0.334649	-1.40678	Down	MGI:1914179
>interaction	Rbbp4	Asf1a	10090.ENSMUSP00000099658	10090.ENSMUSP00000020004	0	0	0	0	0.268	0.684	0	0.553	0.887	>node 1 information	Rbbp4	ENSMUSG00000057236	103.011	139.545	121.278	0.301242	0.997	0.300338	-1.35466	Down	MGI:1194912				>node 2 information	Asf1a	ENSMUSG00000019857	17.906	39.0871	28.4965	0.743286	0.806	0.599089	-2.18291	Down	MGI:1913653	cell differentiation
>interaction	Rasa1	Epha2	10090.ENSMUSP00000105179	10090.ENSMUSP00000006614	0	0	0	0	0.07	0.111	0.854	0.172	0.886	>node 1 information	Rasa1	ENSMUSG00000021549	28.7617	40.4315	34.5966	0.337311	0.86	0.290087	-1.40574	Down	MGI:97860	cell proliferation			>node 2 information	Epha2	ENSMUSG00000006445	22.9391	11.3933	17.1662	0.672589	0.661	0.444581	2.01339	Up	MGI:95278	cell proliferation;cell differentiation
>interaction	Nmd3	Nop58	10090.ENSMUSP00000029358	10090.ENSMUSP00000027174	0	0	0	0	0.849	0.115	0	0.214	0.885	>node 1 information	Nmd3	ENSMUSG00000027787	38.0929	51.5293	44.8111	0.299845	0.919	0.275558	-1.35273	Down	MGI:2140103				>node 2 information	Nop58	ENSMUSG00000026020	38.1776	55.3223	46.7499	0.366732	0.929	0.340694	-1.44908	Down	MGI:1933184
>interaction	Eng	Acvrl1	10090.ENSMUSP00000009705	10090.ENSMUSP00000000542	0	0	0	0	0.166	0.531	0	0.723	0.882	>node 1 information	Eng	ENSMUSG00000026814	11.9543	4.61291	8.2836	0.886255	0.484	0.428948	2.59149	Up	MGI:95392	cell proliferation;cell differentiation			>node 2 information	Acvrl1	ENSMUSG00000000530	10.6273	4.67887	7.65308	0.777259	0.471	0.366089	2.27134	Up	MGI:1338946	cell proliferation;cell differentiation
>interaction	Mphosph8	Hist1h3e	10090.ENSMUSP00000112170	10090.ENSMUSP00000100739	0	0	0	0	0.053	0.795	0	0.444	0.882	>node 1 information	Mphosph8	ENSMUSG00000079184	21.6034	35.63	28.6167	0.490154	0.807	0.395555	-1.64928	Down	MGI:1922589				>node 2 information	Hist1h3e	ENSMUSG00000069273	2.38594	0.341943	1.36394	1.4986	0.266	0.398626	6.9776	Up	MGI:2448326
>interaction	Rbbp4	Asf1b	10090.ENSMUSP00000099658	10090.ENSMUSP00000005607	0	0	0	0	0.252	0.684	0	0.54	0.882	>node 1 information	Rbbp4	ENSMUSG00000057236	103.011	139.545	121.278	0.301242	0.997	0.300338	-1.35466	Down	MGI:1194912				>node 2 information	Asf1b	ENSMUSG00000005470	72.1413	101.487	86.8141	0.338029	0.99	0.334649	-1.40678	Down	MGI:1914179
>interaction	Acad8	Etfa	10090.ENSMUSP00000054370	10090.ENSMUSP00000034866	0.318	0.026	0	0	0.189	0.655	0.383	0.159	0.882	>node 1 information	Acad8	ENSMUSG00000031969	10.2233	19.9453	15.0843	0.644511	0.629	0.405398	-1.95096	Down	MGI:1914198				>node 2 information	Etfa	ENSMUSG00000032314	20.1832	39.3252	29.7542	0.643338	0.818	0.52625	-1.94841	Down	MGI:106092
>interaction	Ncor2	Pparg	10090.ENSMUSP00000083250	10090.ENSMUSP00000000450	0	0	0	0	0	0.586	0.528	0.443	0.881	>node 1 information	Ncor2	ENSMUSG00000029478	77.2072	56.488	66.8476	0.309947	0.974	0.301888	1.36679	Up	MGI:1337080	cell proliferation;cell differentiation			>node 2 information	Pparg	ENSMUSG00000000440	0.886802	3.31489	2.10085	1.15577	0.307	0.35482	-3.73803	Down	MGI:97747	cell proliferation;cell differentiation
>interaction	Rere	Hdac2	10090.ENSMUSP00000101307	10090.ENSMUSP00000019911	0	0	0	0	0.063	0.571	0.72	0.07	0.881	>node 1 information	Rere	ENSMUSG00000039852	58.23	42.8225	50.5262	0.304941	0.942	0.287254	1.3598	Up	MGI:2683486	cell proliferation;cell differentiation			>node 2 information	Hdac2	ENSMUSG00000019777	62.0497	84.1093	73.0795	0.301858	0.981	0.296122	-1.35552	Down	MGI:1097691	cell proliferation;cell differentiation
>interaction	Uba6	Ube2b	10090.ENSMUSP00000035328	10090.ENSMUSP00000020657	0	0	0	0	0.067	0.566	0.361	0.597	0.881	>node 1 information	Uba6	ENSMUSG00000035898	16.5199	28.092	22.3059	0.51879	0.736	0.381829	-1.70049	Down	MGI:1913894				>node 2 information	Ube2b	ENSMUSG00000020390	23.5406	37.2204	30.3805	0.450282	0.823	0.370582	-1.58112	Down	MGI:102944	cell differentiation	abnormal male fertility;abnormal spermatogenesis
>interaction	Hopx	Srf	10090.ENSMUSP00000080630	10090.ENSMUSP00000015749	0	0	0	0	0	0.595	0.527	0.426	0.88	>node 1 information	Hopx	ENSMUSG00000059325	1.66958	8.10133	4.88546	1.31651	0.4	0.526604	-4.85232	Down	MGI:1916782	cell differentiation			>node 2 information	Srf	ENSMUSG00000015605	45.4261	27.0628	36.2445	0.50665	0.873	0.442305	1.67854	Up	MGI:106658	cell proliferation;cell differentiation
>interaction	Ruvbl2	Actr6	10090.ENSMUSP00000033087	10090.ENSMUSP00000020109	0	0	0	0	0.119	0.817	0	0.321	0.88	>node 1 information	Ruvbl2	ENSMUSG00000003868	43.6982	32.091	37.8946	0.306302	0.882	0.270159	1.3617	Up	MGI:1342299				>node 2 information	Actr6	ENSMUSG00000019948	20.9756	32.5225	26.7491	0.431675	0.787	0.339728	-1.55049	Down	MGI:1914269
>interaction	Gnai1	Mapk9	10090.ENSMUSP00000074259	10090.ENSMUSP00000020634	0	0	0	0	0.121	0	0.867	0.046	0.879	>node 1 information	Gnai1	ENSMUSG00000057614	8.8623	19.5502	14.2063	0.752338	0.612	0.460431	-2.206	Down	MGI:95771				>node 2 information	Mapk9	ENSMUSG00000020366	27.7559	40.878	34.3169	0.38238	0.857	0.327699	-1.47277	Down	MGI:1346862	cell differentiation
>interaction	Mapk10	Gnai1	10090.ENSMUSP00000108468	10090.ENSMUSP00000074259	0	0	0	0	0.124	0	0.867	0.046	0.879	>node 1 information	Mapk10	ENSMUSG00000046709	14.6367	8.59425	11.6155	0.520207	0.561	0.291836	1.70308	Up	MGI:1346863	cell differentiation			>node 2 information	Gnai1	ENSMUSG00000057614	8.8623	19.5502	14.2063	0.752338	0.612	0.460431	-2.206	Down	MGI:95771
>interaction	Agt	Jun	10090.ENSMUSP00000066488	10090.ENSMUSP00000054270	0	0	0	0	0	0.067	0.439	0.788	0.879	>node 1 information	Agt	ENSMUSG00000031980	22.6404	7.063	14.8517	1.04886	0.624	0.654491	3.20549	Up	MGI:87963	cell proliferation;cell differentiation			>node 2 information	Jun	ENSMUSG00000052684	51.1912	37.6828	44.437	0.30399	0.917	0.278759	1.35848	Up	MGI:96646	cell proliferation;cell differentiation
>interaction	Cdk14	Mnat1	10090.ENSMUSP00000030763	10090.ENSMUSP00000021523	0	0	0	0	0.047	0.143	0.795	0.358	0.878	>node 1 information	Cdk14	ENSMUSG00000028926	13.3817	8.02872	10.7052	0.500035	0.541	0.270519	1.66673	Up	MGI:894318				>node 2 information	Mnat1	ENSMUSG00000021103	15.9166	6.77796	11.3473	0.80536	0.556	0.44778	2.34829	Up	MGI:106207	cell proliferation	abnormal spermatogenesis
>interaction	Zmiz1	Nfatc2ip	10090.ENSMUSP00000124863	10090.ENSMUSP00000075094	0	0	0	0	0	0.676	0.239	0.544	0.877	>node 1 information	Zmiz1	ENSMUSG00000007817	21.3019	13.1791	17.2405	0.471146	0.662	0.311899	1.61634	Up	MGI:3040693	cell proliferation;cell differentiation			>node 2 information	Nfatc2ip	ENSMUSG00000030722	10.4172	17.4257	13.9215	0.503428	0.607	0.305581	-1.67277	Down	MGI:1329015
>interaction	Nfatc2ip	Pias4	10090.ENSMUSP00000075094	10090.ENSMUSP00000005064	0	0	0	0	0	0.676	0.239	0.544	0.877	>node 1 information	Nfatc2ip	ENSMUSG00000030722	10.4172	17.4257	13.9215	0.503428	0.607	0.305581	-1.67277	Down	MGI:1329015				>node 2 information	Pias4	ENSMUSG00000004934	57.8228	41.5405	49.6816	0.327733	0.939	0.307741	1.39196	Up	MGI:2136940
>interaction	Bcr	Shc4	10090.ENSMUSP00000126377	10090.ENSMUSP00000043146	0	0	0	0	0	0.1	0.866	0.059	0.877	>node 1 information	Bcr	ENSMUSG00000009681	45.8432	32.5858	39.2145	0.338074	0.891	0.301224	1.40685	Up	MGI:88141				>node 2 information	Shc4	ENSMUSG00000035109	2.03214	6.58012	4.30613	1.05616	0.384	0.405567	-3.23803	Down	MGI:2655364	cell proliferation;cell differentiation
>interaction	Mphosph8	Hist1h3c	10090.ENSMUSP00000112170	10090.ENSMUSP00000089346	0	0	0	0	0.053	0.795	0	0.416	0.876	>node 1 information	Mphosph8	ENSMUSG00000079184	21.6034	35.63	28.6167	0.490154	0.807	0.395555	-1.64928	Down	MGI:1922589				>node 2 information	Hist1h3c	ENSMUSG00000069310	2.0088	0.542508	1.27565	1.14944	0.26	0.298855	3.7028	Up	MGI:2448320
>interaction	Itga9	Parvb	10090.ENSMUSP00000044227	10090.ENSMUSP00000023072	0	0	0	0	0.053	0	0.8	0.4	0.876	>node 1 information	Itga9	ENSMUSG00000039115	5.44719	2.40753	3.92736	0.77397	0.372	0.287917	2.26256	Up	MGI:104756				>node 2 information	Parvb	ENSMUSG00000022438	6.85027	12.6497	9.74999	0.594814	0.52	0.309303	-1.8466	Down	MGI:2153063
>interaction	Ddx5	Ddx56	10090.ENSMUSP00000021062	10090.ENSMUSP00000004507	0	0	0.518	0.696	0.752	0.348	0	0.434	0.875	>node 1 information	Ddx5	ENSMUSG00000020719	44.9438	61.3357	53.1397	0.308468	0.948	0.292427	-1.36472	Down	MGI:105037	cell differentiation			>node 2 information	Ddx56	ENSMUSG00000004393	48.5664	33.3119	40.9391	0.372614	0.901	0.335725	1.45793	Up	MGI:1277172	cell differentiation
>interaction	Ddx50	Ddx56	10090.ENSMUSP00000020270	10090.ENSMUSP00000004507	0	0	0.514	0.659	0.746	0.348	0	0.411	0.875	>node 1 information	Ddx50	ENSMUSG00000020076	22.7757	34.4382	28.607	0.407681	0.807	0.328998	-1.51206	Down	MGI:2182303				>node 2 information	Ddx56	ENSMUSG00000004393	48.5664	33.3119	40.9391	0.372614	0.901	0.335725	1.45793	Up	MGI:1277172	cell differentiation
>interaction	Rasal3	Mras	10090.ENSMUSP00000064084	10090.ENSMUSP00000035045	0	0	0	0	0.051	0.209	0.834	0.107	0.874	>node 1 information	Rasal3	ENSMUSG00000052142	2.64598	0.787664	1.71682	1.08242	0.286	0.309571	3.35928	Up	MGI:2444128	cell proliferation			>node 2 information	Mras	ENSMUSG00000032470	16.7019	9.97083	13.3364	0.504715	0.596	0.30081	1.67508	Up	MGI:1100856
>interaction	Mpp6	Gmps	10090.ENSMUSP00000038772	10090.ENSMUSP00000029405	0	0	0	0	0.235	0	0.662	0.546	0.872	>node 1 information	Mpp6	ENSMUSG00000038388	22.641	32.8951	27.768	0.369277	0.799	0.295052	-1.4529	Down	MGI:1927340				>node 2 information	Gmps	ENSMUSG00000027823	30.2407	41.7003	35.9705	0.318583	0.871	0.277486	-1.37895	Down	MGI:2448526
>interaction	Smarca1	Smarca5	10090.ENSMUSP00000076769	10090.ENSMUSP00000044361	0	0	0.527	0.984	0	0.554	0.72	0.697	0.872	>node 1 information	Smarca1	ENSMUSG00000031099	13.2549	22.5757	17.9153	0.52027	0.672	0.349622	-1.7032	Down	MGI:1935127	cell proliferation;cell differentiation			>node 2 information	Smarca5	ENSMUSG00000031715	17.5076	26.9327	22.2202	0.424169	0.735	0.311764	-1.53834	Down	MGI:1935129
>interaction	Nhp2l1	Lsm7	10090.ENSMUSP00000091840	10090.ENSMUSP00000044993	0	0	0	0	0.241	0.781	0	0.29	0.871	>node 1 information	Nhp2l1	ENSMUSG00000063480	33.7821	45.8238	39.803	0.302533	0.895	0.270767	-1.35645	Down	MGI:893586				>node 2 information	Lsm7	ENSMUSG00000035215	28.9878	8.64007	18.8139	1.08152	0.685	0.740844	3.35504	Up	MGI:1913344
>interaction	Smad6	Tgfbr1	10090.ENSMUSP00000036285	10090.ENSMUSP00000007757	0	0	0	0	0.061	0.302	0.528	0.629	0.87	>node 1 information	Smad6	ENSMUSG00000036867	14.8957	6.44865	10.6722	0.791502	0.54	0.427411	2.30989	Up	MGI:1336883	cell proliferation;cell differentiation			>node 2 information	Tgfbr1	ENSMUSG00000007613	8.04767	14.1871	11.1174	0.552237	0.55	0.30373	-1.76288	Down	MGI:98728	cell proliferation;cell differentiation
>interaction	Psmd14	Rad23a	10090.ENSMUSP00000028278	10090.ENSMUSP00000003911	0	0	0	0	0.115	0.784	0	0.377	0.87	>node 1 information	Psmd14	ENSMUSG00000026914	35.7514	55.7193	45.7353	0.436597	0.924	0.403415	-1.55852	Down	MGI:1913284				>node 2 information	Rad23a	ENSMUSG00000003813	35.2558	23.8675	29.5617	0.385239	0.816	0.314355	1.47715	Up	MGI:105126
>interaction	Mcl1	Tnks2	10090.ENSMUSP00000044048	10090.ENSMUSP00000025729	0	0	0	0	0.08	0.838	0.123	0.118	0.869	>node 1 information	Mcl1	ENSMUSG00000038612	32.8918	47.8731	40.3824	0.370985	0.898	0.333145	-1.45547	Down	MGI:101769	cell differentiation			>node 2 information	Tnks2	ENSMUSG00000024811	20.2129	30.4729	25.3429	0.404846	0.773	0.312946	-1.5076	Down	MGI:1921743
>interaction	Rel	Chuk	10090.ENSMUSP00000099928	10090.ENSMUSP00000026217	0	0	0	0	0.052	0.295	0.379	0.722	0.869	>node 1 information	Rel	ENSMUSG00000020275	4.44161	8.43629	6.43895	0.620393	0.439	0.272353	-1.89938	Down	MGI:97897				>node 2 information	Chuk	ENSMUSG00000025199	19.7253	35.6368	27.681	0.574816	0.798	0.458703	-1.80665	Down	MGI:99484	cell proliferation;cell differentiation
>interaction	Idh2	Gpt2	10090.ENSMUSP00000103007	10090.ENSMUSP00000034136	0	0	0	0	0.269	0	0.8	0.169	0.868	>node 1 information	Idh2	ENSMUSG00000030541	23.7115	6.32501	15.0183	1.15769	0.628	0.72703	3.74885	Up	MGI:96414	cell proliferation;cell differentiation			>node 2 information	Gpt2	ENSMUSG00000031700	13.3975	20.856	17.1268	0.435488	0.66	0.287422	-1.55671	Down	MGI:1915391
>interaction	Slmap	Strn3	10090.ENSMUSP00000046956	10090.ENSMUSP00000013130	0	0	0	0	0.147	0.554	0	0.682	0.868	>node 1 information	Slmap	ENSMUSG00000021870	35.3538	49.9837	42.6688	0.342872	0.91	0.312013	-1.41381	Down	MGI:1933549				>node 2 information	Strn3	ENSMUSG00000020954	16.2606	29.1284	22.6945	0.567001	0.74	0.419581	-1.79135	Down	MGI:2151064
>interaction	Uba6	Ube2t	10090.ENSMUSP00000035328	10090.ENSMUSP00000027687	0	0	0	0	0.051	0.58	0.135	0.663	0.868	>node 1 information	Uba6	ENSMUSG00000035898	16.5199	28.092	22.3059	0.51879	0.736	0.381829	-1.70049	Down	MGI:1913894				>node 2 information	Ube2t	ENSMUSG00000026429	23.2075	33.5272	28.3673	0.363788	0.804	0.292486	-1.44467	Down	MGI:1914446
>interaction	Rpl22l1	Rpl19	10090.ENSMUSP00000043111	10090.ENSMUSP00000017548	0	0	0	0	0.719	0.36	0	0.319	0.867	>node 1 information	Rpl22l1	ENSMUSG00000039221	9.26907	15.9785	12.6238	0.531489	0.581	0.308795	-1.72385	Down	MGI:1915278				>node 2 information	Rpl19	ENSMUSG00000017404	16.2771	4.48338	10.3802	1.13617	0.534	0.606715	3.63054	Up	MGI:98020
>interaction	Ash1l	Smarca5	10090.ENSMUSP00000088451	10090.ENSMUSP00000044361	0	0	0	0	0.185	0.527	0.135	0.65	0.867	>node 1 information	Ash1l	ENSMUSG00000028053	20.181	29.1935	24.6872	0.365067	0.766	0.279641	-1.44658	Down	MGI:2183158		abnormal male fertility		>node 2 information	Smarca5	ENSMUSG00000031715	17.5076	26.9327	22.2202	0.424169	0.735	0.311764	-1.53834	Down	MGI:1935129
>interaction	Spdya	Cdk1	10090.ENSMUSP00000118994	10090.ENSMUSP00000020099	0	0	0	0	0.05	0.104	0.8	0.313	0.867	>node 1 information	Spdya	ENSMUSG00000052525	2.46076	5.85964	4.1602	0.816999	0.379	0.309643	-2.38123	Down	MGI:1918141	cell proliferation	abnormal male fertility		>node 2 information	Cdk1	ENSMUSG00000019942	57.6102	40.4389	49.0245	0.350259	0.936	0.327843	1.42462	Up	MGI:88351	cell proliferation;cell differentiation
>interaction	Rad21l	Smc4	10090.ENSMUSP00000094174	10090.ENSMUSP00000047872	0	0	0	0	0.18	0.709	0	0.486	0.866	>node 1 information	Rad21l	ENSMUSG00000074704	3.57825	10.297	6.93762	0.968451	0.454	0.439677	-2.87766	Down	MGI:3652039		abnormal male fertility		>node 2 information	Smc4	ENSMUSG00000034349	22.8962	42.0519	32.474	0.589877	0.842	0.496677	-1.83663	Down	MGI:1917349
>interaction	Utp18	Nmd3	10090.ENSMUSP00000068103	10090.ENSMUSP00000029358	0	0	0	0	0.848	0	0	0.155	0.866	>node 1 information	Utp18	ENSMUSG00000054079	19.3802	41.494	30.4371	0.726541	0.824	0.59867	-2.14105	Down	MGI:1923402				>node 2 information	Nmd3	ENSMUSG00000027787	38.0929	51.5293	44.8111	0.299845	0.919	0.275558	-1.35273	Down	MGI:2140103
>interaction	Cops5	Psma6	10090.ENSMUSP00000027050	10090.ENSMUSP00000021412	0	0	0	0	0.458	0.687	0.246	0.082	0.866	>node 1 information	Cops5	ENSMUSG00000025917	26.1005	36.3417	31.2211	0.328022	0.832	0.272914	-1.39238	Down	MGI:1349415				>node 2 information	Psma6	ENSMUSG00000021024	49.725	69.4944	59.6097	0.331647	0.963	0.319376	-1.39757	Down	MGI:1347006
>interaction	Hist1h3c	Asf1b	10090.ENSMUSP00000089346	10090.ENSMUSP00000005607	0	0	0	0	0.097	0.735	0	0.482	0.865	>node 1 information	Hist1h3c	ENSMUSG00000069310	2.0088	0.542508	1.27565	1.14944	0.26	0.298855	3.7028	Up	MGI:2448320				>node 2 information	Asf1b	ENSMUSG00000005470	72.1413	101.487	86.8141	0.338029	0.99	0.334649	-1.40678	Down	MGI:1914179
>interaction	Ldha	Pgk1	10090.ENSMUSP00000103267	10090.ENSMUSP00000080302	0.046	0	0	0	0.62	0.11	0	0.631	0.865	>node 1 information	Ldha	ENSMUSG00000063229	22.1962	14.0589	18.1275	0.448891	0.675	0.303002	1.5788	Up	MGI:96759				>node 2 information	Pgk1	ENSMUSG00000062070	23.5947	34.2451	28.9199	0.368272	0.809	0.297932	-1.45139	Down	MGI:97555
>interaction	Hist1h3c	Asf1a	10090.ENSMUSP00000089346	10090.ENSMUSP00000020004	0	0	0	0	0.097	0.735	0	0.482	0.865	>node 1 information	Hist1h3c	ENSMUSG00000069310	2.0088	0.542508	1.27565	1.14944	0.26	0.298855	3.7028	Up	MGI:2448320				>node 2 information	Asf1a	ENSMUSG00000019857	17.906	39.0871	28.4965	0.743286	0.806	0.599089	-2.18291	Down	MGI:1913653	cell differentiation
>interaction	Cul3	Cops2	10090.ENSMUSP00000130738	10090.ENSMUSP00000028635	0	0	0	0	0.566	0.607	0	0.273	0.865	>node 1 information	Cul3	ENSMUSG00000004364	46.4411	68.4015	57.4213	0.382443	0.959	0.366763	-1.47287	Down	MGI:1347360	cell differentiation			>node 2 information	Cops2	ENSMUSG00000027206	25.3319	35.7837	30.5578	0.342034	0.826	0.28252	-1.41259	Down	MGI:1330276	cell proliferation;cell differentiation
>interaction	Rap1b	Mapk9	10090.ENSMUSP00000066238	10090.ENSMUSP00000020634	0	0	0	0	0.066	0.133	0.836	0.1	0.865	>node 1 information	Rap1b	ENSMUSG00000052681	55.3166	73.0087	64.1626	0.275738	0.97	0.267466	-1.31983	Down	MGI:894315	cell proliferation;cell differentiation			>node 2 information	Mapk9	ENSMUSG00000020366	27.7559	40.878	34.3169	0.38238	0.857	0.327699	-1.47277	Down	MGI:1346862	cell differentiation
>interaction	Mapk10	Rap1b	10090.ENSMUSP00000108468	10090.ENSMUSP00000066238	0	0	0	0	0.066	0.133	0.836	0.101	0.865	>node 1 information	Mapk10	ENSMUSG00000046709	14.6367	8.59425	11.6155	0.520207	0.561	0.291836	1.70308	Up	MGI:1346863	cell differentiation			>node 2 information	Rap1b	ENSMUSG00000052681	55.3166	73.0087	64.1626	0.275738	0.97	0.267466	-1.31983	Down	MGI:894315	cell proliferation;cell differentiation
>interaction	Pax8	Pparg	10090.ENSMUSP00000028355	10090.ENSMUSP00000000450	0	0	0	0	0.042	0.047	0.8	0.344	0.864	>node 1 information	Pax8	ENSMUSG00000026976	3.15596	1.22147	2.18872	0.883847	0.311	0.274877	2.58374	Up	MGI:97492	cell differentiation	abnormal male fertility		>node 2 information	Pparg	ENSMUSG00000000440	0.886802	3.31489	2.10085	1.15577	0.307	0.35482	-3.73803	Down	MGI:97747	cell proliferation;cell differentiation
>interaction	Rock1	Ppp1cb	10090.ENSMUSP00000069549	10090.ENSMUSP00000015100	0	0	0	0	0.338	0	0.8	0.059	0.864	>node 1 information	Rock1	ENSMUSG00000024290	18.0534	29.2585	23.656	0.473669	0.752	0.356199	-1.62066	Down	MGI:107927	cell differentiation			>node 2 information	Ppp1cb	ENSMUSG00000014956	33.4212	51.1162	42.2687	0.418631	0.907	0.379699	-1.52945	Down	MGI:104871
>interaction	Cul3	Cand1	10090.ENSMUSP00000130738	10090.ENSMUSP00000020315	0	0	0	0	0.211	0.753	0	0.36	0.864	>node 1 information	Cul3	ENSMUSG00000004364	46.4411	68.4015	57.4213	0.382443	0.959	0.366763	-1.47287	Down	MGI:1347360	cell differentiation			>node 2 information	Cand1	ENSMUSG00000020114	54.1099	74.0282	64.0691	0.310888	0.97	0.301561	-1.36811	Down	MGI:1261820	cell differentiation
>interaction	Ryr1	Calm2	10090.ENSMUSP00000137123	10090.ENSMUSP00000048857	0	0	0	0	0.053	0.859	0	0.06	0.863	>node 1 information	Ryr1	ENSMUSG00000030592	3.63502	1.10367	2.36935	1.06838	0.318	0.339743	3.29358	Up	MGI:99659	cell differentiation			>node 2 information	Calm2	ENSMUSG00000036438	58.3927	92.548	75.4703	0.452566	0.983	0.444872	-1.58492	Down	MGI:103250
>interaction	Top2a	Gmps	10090.ENSMUSP00000068896	10090.ENSMUSP00000029405	0.07	0	0	0	0.524	0	0	0.716	0.863	>node 1 information	Top2a	ENSMUSG00000020914	47.0462	64.8343	55.9402	0.317984	0.955	0.303675	-1.3781	Down	MGI:98790	cell differentiation			>node 2 information	Gmps	ENSMUSG00000027823	30.2407	41.7003	35.9705	0.318583	0.871	0.277486	-1.37895	Down	MGI:2448526
>interaction	Hadhb	Sucla2	10090.ENSMUSP00000026841	10090.ENSMUSP00000022706	0.062	0	0	0	0.241	0	0.8	0.155	0.863	>node 1 information	Hadhb	ENSMUSG00000059447	12.536	21.3069	16.9215	0.51833	0.658	0.341061	-1.69966	Down	MGI:2136381				>node 2 information	Sucla2	ENSMUSG00000022110	27.9656	47.012	37.4888	0.508056	0.88	0.447089	-1.68107	Down	MGI:1306775
>interaction	Ube2d3	Uba6	10090.ENSMUSP00000101898	10090.ENSMUSP00000035328	0	0	0	0	0.089	0.709	0.135	0.475	0.863	>node 1 information	Ube2d3	ENSMUSG00000078578	18.9692	28.5682	23.7687	0.40385	0.754	0.304503	-1.50603	Down	MGI:1913355				>node 2 information	Uba6	ENSMUSG00000035898	16.5199	28.092	22.3059	0.51879	0.736	0.381829	-1.70049	Down	MGI:1913894
>interaction	Cebpa	Jun	10090.ENSMUSP00000096129	10090.ENSMUSP00000054270	0	0	0	0	0.053	0.11	0.528	0.695	0.862	>node 1 information	Cebpa	ENSMUSG00000034957	11.9635	5.90369	8.9336	0.678317	0.5	0.339159	2.02644	Up	MGI:99480	cell proliferation;cell differentiation			>node 2 information	Jun	ENSMUSG00000052684	51.1912	37.6828	44.437	0.30399	0.917	0.278759	1.35848	Up	MGI:96646	cell proliferation;cell differentiation
>interaction	Gmps	Top2b	10090.ENSMUSP00000029405	10090.ENSMUSP00000017629	0.07	0	0	0	0.511	0	0	0.716	0.859	>node 1 information	Gmps	ENSMUSG00000027823	30.2407	41.7003	35.9705	0.318583	0.871	0.277486	-1.37895	Down	MGI:2448526				>node 2 information	Top2b	ENSMUSG00000017485	11.6204	23.5306	17.5755	0.677659	0.667	0.451999	-2.02494	Down	MGI:98791	cell differentiation
>interaction	Jun	Atf1	10090.ENSMUSP00000054270	10090.ENSMUSP00000023769	0	0	0	0	0	0.108	0.528	0.693	0.859	>node 1 information	Jun	ENSMUSG00000052684	51.1912	37.6828	44.437	0.30399	0.917	0.278759	1.35848	Up	MGI:96646	cell proliferation;cell differentiation			>node 2 information	Atf1	ENSMUSG00000023027	22.6897	33.3599	28.0248	0.380741	0.802	0.305355	-1.47027	Down	MGI:1298366	cell differentiation
>interaction	Jun	Cops5	10090.ENSMUSP00000054270	10090.ENSMUSP00000027050	0	0	0	0	0.046	0.485	0.528	0.46	0.858	>node 1 information	Jun	ENSMUSG00000052684	51.1912	37.6828	44.437	0.30399	0.917	0.278759	1.35848	Up	MGI:96646	cell proliferation;cell differentiation			>node 2 information	Cops5	ENSMUSG00000025917	26.1005	36.3417	31.2211	0.328022	0.832	0.272914	-1.39238	Down	MGI:1349415
>interaction	Nmd3	Xpo1	10090.ENSMUSP00000029358	10090.ENSMUSP00000020538	0	0	0	0	0.117	0.485	0	0.713	0.858	>node 1 information	Nmd3	ENSMUSG00000027787	38.0929	51.5293	44.8111	0.299845	0.919	0.275558	-1.35273	Down	MGI:2140103				>node 2 information	Xpo1	ENSMUSG00000020290	43.3663	69.5431	56.4547	0.463678	0.957	0.44374	-1.60362	Down	MGI:2144013
>interaction	Cops5	Psmd6	10090.ENSMUSP00000027050	10090.ENSMUSP00000022256	0	0	0	0	0.518	0.687	0	0.139	0.858	>node 1 information	Cops5	ENSMUSG00000025917	26.1005	36.3417	31.2211	0.328022	0.832	0.272914	-1.39238	Down	MGI:1349415				>node 2 information	Psmd6	ENSMUSG00000021737	40.3639	54.0615	47.2127	0.290125	0.93	0.269817	-1.33935	Down	MGI:1913663
>interaction	Ppp1cc	Rock2	10090.ENSMUSP00000099587	10090.ENSMUSP00000020904	0	0	0	0	0.089	0	0.8	0.279	0.857	>node 1 information	Ppp1cc	ENSMUSG00000004455	31.299	43.4603	37.3796	0.325345	0.88	0.286304	-1.38855	Down	MGI:104872	cell differentiation	abnormal male fertility		>node 2 information	Rock2	ENSMUSG00000020580	19.4463	28.964	24.2051	0.39321	0.76	0.298839	-1.48944	Down	MGI:107926	cell differentiation
>interaction	Ssb	Nmd3	10090.ENSMUSP00000088365	10090.ENSMUSP00000029358	0	0	0	0	0.855	0	0	0.054	0.857	>node 1 information	Ssb	ENSMUSG00000068882	48.4089	70.3089	59.3589	0.368942	0.963	0.355291	-1.4524	Down	MGI:98423				>node 2 information	Nmd3	ENSMUSG00000027787	38.0929	51.5293	44.8111	0.299845	0.919	0.275558	-1.35273	Down	MGI:2140103
>interaction	Mcm9	Asf1b	10090.ENSMUSP00000074978	10090.ENSMUSP00000005607	0	0	0	0	0.267	0.712	0	0.375	0.856	>node 1 information	Mcm9	ENSMUSG00000058298	11.5128	4.25857	7.88568	0.919924	0.476	0.437884	2.70344	Up	MGI:1918817				>node 2 information	Asf1b	ENSMUSG00000005470	72.1413	101.487	86.8141	0.338029	0.99	0.334649	-1.40678	Down	MGI:1914179
>interaction	Arid4b	Hdac2	10090.ENSMUSP00000106163	10090.ENSMUSP00000019911	0	0	0	0	0.078	0.68	0	0.55	0.855	>node 1 information	Arid4b	ENSMUSG00000039219	9.457	20.0884	14.7727	0.719665	0.622	0.447632	-2.12418	Down	MGI:2137512	cell differentiation	abnormal male fertility;abnormal spermatogenesis		>node 2 information	Hdac2	ENSMUSG00000019777	62.0497	84.1093	73.0795	0.301858	0.981	0.296122	-1.35552	Down	MGI:1097691	cell proliferation;cell differentiation
>interaction	Nt5e	Eng	10090.ENSMUSP00000034992	10090.ENSMUSP00000009705	0	0	0	0	0	0	0	0.854	0.854	>node 1 information	Nt5e	ENSMUSG00000032420	24.2773	34.4179	29.3476	0.345534	0.814	0.281265	-1.4177	Down	MGI:99782				>node 2 information	Eng	ENSMUSG00000026814	11.9543	4.61291	8.2836	0.886255	0.484	0.428948	2.59149	Up	MGI:95392	cell proliferation;cell differentiation
>interaction	Mcm9	Asf1a	10090.ENSMUSP00000074978	10090.ENSMUSP00000020004	0	0	0	0	0.267	0.712	0	0.364	0.854	>node 1 information	Mcm9	ENSMUSG00000058298	11.5128	4.25857	7.88568	0.919924	0.476	0.437884	2.70344	Up	MGI:1918817				>node 2 information	Asf1a	ENSMUSG00000019857	17.906	39.0871	28.4965	0.743286	0.806	0.599089	-2.18291	Down	MGI:1913653	cell differentiation
>interaction	Kitl	Epha2	10090.ENSMUSP00000100920	10090.ENSMUSP00000006614	0	0	0	0	0	0.062	0.825	0.177	0.853	>node 1 information	Kitl	ENSMUSG00000019966	29.851	43.7382	36.7946	0.377425	0.876	0.330624	-1.46522	Down	MGI:96974	cell proliferation;cell differentiation	abnormal male fertility;abnormal spermatogenesis		>node 2 information	Epha2	ENSMUSG00000006445	22.9391	11.3933	17.1662	0.672589	0.661	0.444581	2.01339	Up	MGI:95278	cell proliferation;cell differentiation
>interaction	Sct	Cck	10090.ENSMUSP00000128729	10090.ENSMUSP00000035120	0	0	0	0	0	0	0	0.853	0.853	>node 1 information	Sct	ENSMUSG00000038580	3.12958	0.172299	1.65094	1.79127	0.282	0.505139	18.1637	Up	MGI:99466				>node 2 information	Cck	ENSMUSG00000032532	0.378231	3.23965	1.80894	1.58182	0.291	0.46031	-8.56527	Down	MGI:88297	cell proliferation;cell differentiation
>interaction	Tubg1	Mzt1	10090.ENSMUSP00000048036	10090.ENSMUSP00000037557	0	0	0	0	0.063	0.664	0.36	0.356	0.852	>node 1 information	Tubg1	ENSMUSG00000035198	60.2912	42.6845	51.4879	0.341958	0.945	0.323151	1.41248	Up	MGI:101834				>node 2 information	Mzt1	ENSMUSG00000033186	10.715	16.885	13.8	0.447101	0.605	0.270496	-1.57583	Down	MGI:1924039
>interaction	Smc5	Smc1b	10090.ENSMUSP00000084837	10090.ENSMUSP00000023068	0	0	0	0	0.676	0	0	0.558	0.851	>node 1 information	Smc5	ENSMUSG00000024943	16.0463	24.2651	20.1557	0.407766	0.707	0.28829	-1.51219	Down	MGI:2385088				>node 2 information	Smc1b	ENSMUSG00000022432	31.3255	53.9162	42.6208	0.530039	0.909	0.481805	-1.72116	Down	MGI:2154049		abnormal male fertility
>interaction	Arfip1	Arl1	10090.ENSMUSP00000122964	10090.ENSMUSP00000111942	0	0	0	0	0.149	0.792	0.196	0.07	0.85	>node 1 information	Arfip1	ENSMUSG00000074513	12.061	19.8888	15.9749	0.490006	0.643	0.315074	-1.64902	Down	MGI:1277120				>node 2 information	Arl1	ENSMUSG00000060904	45.25	63.14	54.195	0.330104	0.952	0.314259	-1.39536	Down	MGI:99436
>interaction	Csf1	Epha2	10090.ENSMUSP00000014743	10090.ENSMUSP00000006614	0	0	0	0	0	0.109	0.825	0.121	0.85	>node 1 information	Csf1	ENSMUSG00000014599	2.32739	0.702095	1.51474	1.07298	0.275	0.295071	3.31492	Up	MGI:1339753	cell proliferation;cell differentiation	abnormal male fertility		>node 2 information	Epha2	ENSMUSG00000006445	22.9391	11.3933	17.1662	0.672589	0.661	0.444581	2.01339	Up	MGI:95278	cell proliferation;cell differentiation
>interaction	Rel	Jun	10090.ENSMUSP00000099928	10090.ENSMUSP00000054270	0	0	0	0	0.052	0.05	0.379	0.765	0.85	>node 1 information	Rel	ENSMUSG00000020275	4.44161	8.43629	6.43895	0.620393	0.439	0.272353	-1.89938	Down	MGI:97897				>node 2 information	Jun	ENSMUSG00000052684	51.1912	37.6828	44.437	0.30399	0.917	0.278759	1.35848	Up	MGI:96646	cell proliferation;cell differentiation
>interaction	Hfm1	Snrpd2	10090.ENSMUSP00000108310	10090.ENSMUSP00000037597	0	0	0	0	0	0.798	0	0.291	0.85	>node 1 information	Hfm1	ENSMUSG00000043410	2.66377	6.26674	4.46525	0.80689	0.389	0.31388	-2.35258	Down	MGI:3036246	cell differentiation	abnormal male fertility;abnormal spermatogenesis		>node 2 information	Snrpd2	ENSMUSG00000040824	48.1126	97.5585	72.8355	0.67887	0.981	0.665972	-2.02771	Down	MGI:98345
>interaction	Tubg2	Mzt1	10090.ENSMUSP00000045901	10090.ENSMUSP00000037557	0	0	0	0	0	0.664	0.36	0.356	0.849	>node 1 information	Tubg2	ENSMUSG00000045007	8.58332	3.79528	6.1893	0.7736	0.433	0.334969	2.26158	Up	MGI:2144208				>node 2 information	Mzt1	ENSMUSG00000033186	10.715	16.885	13.8	0.447101	0.605	0.270496	-1.57583	Down	MGI:1924039
>interaction	Ppp1cc	Eif2ak2	10090.ENSMUSP00000099587	10090.ENSMUSP00000024884	0	0	0	0	0	0.111	0.8	0.219	0.849	>node 1 information	Ppp1cc	ENSMUSG00000004455	31.299	43.4603	37.3796	0.325345	0.88	0.286304	-1.38855	Down	MGI:104872	cell differentiation	abnormal male fertility		>node 2 information	Eif2ak2	ENSMUSG00000024079	4.03867	15.6903	9.86449	1.18117	0.523	0.617752	-3.88502	Down	MGI:1353449	cell proliferation;cell differentiation
>interaction	Kif22	Cdk1	10090.ENSMUSP00000032915	10090.ENSMUSP00000020099	0	0	0	0	0.81	0.109	0	0.181	0.849	>node 1 information	Kif22	ENSMUSG00000030677	20.6472	30.3917	25.5194	0.381846	0.775	0.295931	-1.47195	Down	MGI:109233				>node 2 information	Cdk1	ENSMUSG00000019942	57.6102	40.4389	49.0245	0.350259	0.936	0.327843	1.42462	Up	MGI:88351	cell proliferation;cell differentiation
>interaction	Ccdc6	Ret	10090.ENSMUSP00000123374	10090.ENSMUSP00000032201	0	0	0	0	0	0.062	0.8	0.257	0.848	>node 1 information	Ccdc6	ENSMUSG00000048701	86.5052	63.4568	74.981	0.30739	0.983	0.302164	1.36321	Up	MGI:1923801				>node 2 information	Ret	ENSMUSG00000030110	36.526	25.857	31.1915	0.342048	0.832	0.284584	1.41262	Up	MGI:97902	cell differentiation	abnormal male fertility;abnormal spermatogenesis	Ret
>interaction	Utp18	Gmps	10090.ENSMUSP00000068103	10090.ENSMUSP00000029405	0	0	0	0	0.848	0	0	0	0.848	>node 1 information	Utp18	ENSMUSG00000054079	19.3802	41.494	30.4371	0.726541	0.824	0.59867	-2.14105	Down	MGI:1923402				>node 2 information	Gmps	ENSMUSG00000027823	30.2407	41.7003	35.9705	0.318583	0.871	0.277486	-1.37895	Down	MGI:2448526
>interaction	Foxo6	Mapk9	10090.ENSMUSP00000099716	10090.ENSMUSP00000020634	0	0	0	0	0.05	0	0.837	0.086	0.847	>node 1 information	Foxo6	ENSMUSG00000052135	35.6424	21.263	28.4527	0.505379	0.805	0.40683	1.67626	Up	MGI:2676586				>node 2 information	Mapk9	ENSMUSG00000020366	27.7559	40.878	34.3169	0.38238	0.857	0.327699	-1.47277	Down	MGI:1346862	cell differentiation
>interaction	Pdlim7	Actn1	10090.ENSMUSP00000047173	10090.ENSMUSP00000021554	0	0	0	0	0.289	0.676	0.216	0.257	0.847	>node 1 information	Pdlim7	ENSMUSG00000021493	25.7708	16.1852	20.978	0.456936	0.719	0.328537	1.59224	Up	MGI:1914649	cell differentiation			>node 2 information	Actn1	ENSMUSG00000015143	14.1553	7.81392	10.9846	0.577297	0.547	0.315781	1.81155	Up	MGI:2137706	cell differentiation
>interaction	Nfatc2ip	Senp2	10090.ENSMUSP00000075094	10090.ENSMUSP00000023561	0	0	0	0	0.077	0.654	0	0.559	0.847	>node 1 information	Nfatc2ip	ENSMUSG00000030722	10.4172	17.4257	13.9215	0.503428	0.607	0.305581	-1.67277	Down	MGI:1329015				>node 2 information	Senp2	ENSMUSG00000022855	15.9426	29.4966	22.7196	0.596577	0.741	0.442064	-1.85018	Down	MGI:1923076	cell differentiation
>interaction	Foxo6	Chuk	10090.ENSMUSP00000099716	10090.ENSMUSP00000026217	0	0	0	0	0	0.1	0.836	0	0.846	>node 1 information	Foxo6	ENSMUSG00000052135	35.6424	21.263	28.4527	0.505379	0.805	0.40683	1.67626	Up	MGI:2676586				>node 2 information	Chuk	ENSMUSG00000025199	19.7253	35.6368	27.681	0.574816	0.798	0.458703	-1.80665	Down	MGI:99484	cell proliferation;cell differentiation
>interaction	Tpsb2	Cpa3	10090.ENSMUSP00000063499	10090.ENSMUSP00000001921	0.058	0	0	0	0.16	0.115	0.133	0.785	0.845	>node 1 information	Tpsb2	ENSMUSG00000033825	8.65887	1.31523	4.98705	1.47254	0.403	0.593434	6.58354	Up	MGI:96942				>node 2 information	Cpa3	ENSMUSG00000001865	4.86195	1.01121	2.93658	1.3113	0.34	0.445842	4.80805	Up	MGI:88479
>interaction	Smc5	Magea5	10090.ENSMUSP00000084837	10090.ENSMUSP00000065852	0	0	0	0	0.054	0.671	0	0.543	0.845	>node 1 information	Smc5	ENSMUSG00000024943	16.0463	24.2651	20.1557	0.407766	0.707	0.28829	-1.51219	Down	MGI:2385088				>node 2 information	Magea5	ENSMUSG00000079349	13.6526	5.05598	9.35429	0.919003	0.511	0.469611	2.70029	Up	MGI:1333838
>interaction	Smc5	Magea4	10090.ENSMUSP00000084837	10090.ENSMUSP00000046715	0	0	0	0	0.054	0.671	0	0.543	0.845	>node 1 information	Smc5	ENSMUSG00000024943	16.0463	24.2651	20.1557	0.407766	0.707	0.28829	-1.51219	Down	MGI:2385088				>node 2 information	Magea4	ENSMUSG00000033343	1.85326	4.50466	3.17896	0.834046	0.348	0.290248	-2.43067	Down	MGI:1333839
>interaction	Usp14	Cops2	10090.ENSMUSP00000089728	10090.ENSMUSP00000028635	0	0	0	0	0.293	0.779	0	0.092	0.845	>node 1 information	Usp14	ENSMUSG00000047879	17.3202	26.1367	21.7284	0.405758	0.728	0.295392	-1.50903	Down	MGI:1928898		abnormal male fertility		>node 2 information	Cops2	ENSMUSG00000027206	25.3319	35.7837	30.5578	0.342034	0.826	0.28252	-1.41259	Down	MGI:1330276	cell proliferation;cell differentiation
>interaction	Cct4	Gmps	10090.ENSMUSP00000133523	10090.ENSMUSP00000029405	0.493	0	0	0	0.382	0	0	0.546	0.845	>node 1 information	Cct4	ENSMUSG00000007739	63.0395	83.1193	73.0794	0.274767	0.981	0.269546	-1.31853	Down	MGI:104689				>node 2 information	Gmps	ENSMUSG00000027823	30.2407	41.7003	35.9705	0.318583	0.871	0.277486	-1.37895	Down	MGI:2448526
>interaction	Smc5	Magea3	10090.ENSMUSP00000084837	10090.ENSMUSP00000078793	0	0	0	0	0.054	0.671	0	0.543	0.845	>node 1 information	Smc5	ENSMUSG00000024943	16.0463	24.2651	20.1557	0.407766	0.707	0.28829	-1.51219	Down	MGI:2385088				>node 2 information	Magea3	ENSMUSG00000094196	1.00327	12.6113	6.80729	1.70524	0.45	0.767356	-12.5702	Down	MGI:1333832
>interaction	Rps6ka6	Pkmyt1	10090.ENSMUSP00000080694	10090.ENSMUSP00000024701	0	0	0	0.658	0.051	0.199	0.8	0.231	0.845	>node 1 information	Rps6ka6	ENSMUSG00000025665	11.4844	20.7673	16.1258	0.575653	0.645	0.371296	-1.80831	Down	MGI:1914321				>node 2 information	Pkmyt1	ENSMUSG00000023908	12.409	7.34801	9.87851	0.512323	0.523	0.267945	1.68876	Up	MGI:2137630
>interaction	Ash1l	Asf1a	10090.ENSMUSP00000088451	10090.ENSMUSP00000020004	0	0	0	0	0.067	0.749	0	0.392	0.845	>node 1 information	Ash1l	ENSMUSG00000028053	20.181	29.1935	24.6872	0.365067	0.766	0.279641	-1.44658	Down	MGI:2183158		abnormal male fertility		>node 2 information	Asf1a	ENSMUSG00000019857	17.906	39.0871	28.4965	0.743286	0.806	0.599089	-2.18291	Down	MGI:1913653	cell differentiation
>interaction	Ppp4r4	Smek2	10090.ENSMUSP00000021631	10090.ENSMUSP00000020755	0	0	0	0	0	0	0.72	0.468	0.844	>node 1 information	Ppp4r4	ENSMUSG00000021209	2.1526	5.49931	3.82595	0.874738	0.369	0.322778	-2.55473	Down	MGI:1921771				>node 2 information	Smek2	ENSMUSG00000020463	33.8886	53.3522	43.6204	0.446204	0.914	0.407831	-1.57434	Down	MGI:2144474
>interaction	Mapk10	Foxo6	10090.ENSMUSP00000108468	10090.ENSMUSP00000099716	0	0	0	0	0.05	0	0.837	0.07	0.844	>node 1 information	Mapk10	ENSMUSG00000046709	14.6367	8.59425	11.6155	0.520207	0.561	0.291836	1.70308	Up	MGI:1346863	cell differentiation			>node 2 information	Foxo6	ENSMUSG00000052135	35.6424	21.263	28.4527	0.505379	0.805	0.40683	1.67626	Up	MGI:2676586
>interaction	Mdh1	Sucla2	10090.ENSMUSP00000099938	10090.ENSMUSP00000022706	0.318	0	0	0	0.445	0.108	0.484	0.241	0.843	>node 1 information	Mdh1	ENSMUSG00000020321	19.4513	34.5813	27.0163	0.560032	0.791	0.442986	-1.77784	Down	MGI:97051				>node 2 information	Sucla2	ENSMUSG00000022110	27.9656	47.012	37.4888	0.508056	0.88	0.447089	-1.68107	Down	MGI:1306775
>interaction	Eps15	Ret	10090.ENSMUSP00000099790	10090.ENSMUSP00000032201	0	0	0	0	0.075	0.111	0.82	0.064	0.843	>node 1 information	Eps15	ENSMUSG00000028552	34.5706	56.7453	45.6579	0.48567	0.923	0.448273	-1.64143	Down	MGI:104583	cell proliferation			>node 2 information	Ret	ENSMUSG00000030110	36.526	25.857	31.1915	0.342048	0.832	0.284584	1.41262	Up	MGI:97902	cell differentiation	abnormal male fertility;abnormal spermatogenesis	Ret
>interaction	Cdk1	Asf1b	10090.ENSMUSP00000020099	10090.ENSMUSP00000005607	0	0	0	0	0.816	0.109	0	0.117	0.842	>node 1 information	Cdk1	ENSMUSG00000019942	57.6102	40.4389	49.0245	0.350259	0.936	0.327843	1.42462	Up	MGI:88351	cell proliferation;cell differentiation			>node 2 information	Asf1b	ENSMUSG00000005470	72.1413	101.487	86.8141	0.338029	0.99	0.334649	-1.40678	Down	MGI:1914179
>interaction	Rps6ka6	Bub1	10090.ENSMUSP00000080694	10090.ENSMUSP00000028858	0	0	0	0	0.085	0.062	0.8	0.188	0.842	>node 1 information	Rps6ka6	ENSMUSG00000025665	11.4844	20.7673	16.1258	0.575653	0.645	0.371296	-1.80831	Down	MGI:1914321				>node 2 information	Bub1	ENSMUSG00000027379	25.1238	36.3607	30.7422	0.36552	0.828	0.30265	-1.44726	Down	MGI:1100510		abnormal male fertility;abnormal spermatogenesis
>interaction	Cops2	Psmd14	10090.ENSMUSP00000028635	10090.ENSMUSP00000028278	0	0	0	0	0.348	0.675	0.217	0.162	0.842	>node 1 information	Cops2	ENSMUSG00000027206	25.3319	35.7837	30.5578	0.342034	0.826	0.28252	-1.41259	Down	MGI:1330276	cell proliferation;cell differentiation			>node 2 information	Psmd14	ENSMUSG00000026914	35.7514	55.7193	45.7353	0.436597	0.924	0.403415	-1.55852	Down	MGI:1913284
>interaction	Atp1b3	Atp2a2	10090.ENSMUSP00000034983	10090.ENSMUSP00000031423	0	0	0	0	0.069	0.416	0.72	0.084	0.841	>node 1 information	Atp1b3	ENSMUSG00000032412	43.4348	62.6335	53.0341	0.362006	0.948	0.343182	-1.44201	Down	MGI:107788				>node 2 information	Atp2a2	ENSMUSG00000029467	38.0411	51.0735	44.5573	0.292486	0.918	0.268502	-1.34259	Down	MGI:88110	cell differentiation
>interaction	Itga9	Col4a1	10090.ENSMUSP00000044227	10090.ENSMUSP00000033898	0	0	0	0	0.088	0.068	0.8	0.17	0.84	>node 1 information	Itga9	ENSMUSG00000039115	5.44719	2.40753	3.92736	0.77397	0.372	0.287917	2.26256	Up	MGI:104756				>node 2 information	Col4a1	ENSMUSG00000031502	27.9753	18.7343	23.3548	0.395679	0.749	0.296363	1.49327	Up	MGI:88454
>interaction	Rock1	Rock2	10090.ENSMUSP00000069549	10090.ENSMUSP00000020904	0	0	0	0.974	0.213	0	0.8	0.867	0.839	>node 1 information	Rock1	ENSMUSG00000024290	18.0534	29.2585	23.656	0.473669	0.752	0.356199	-1.62066	Down	MGI:107927	cell differentiation			>node 2 information	Rock2	ENSMUSG00000020580	19.4463	28.964	24.2051	0.39321	0.76	0.298839	-1.48944	Down	MGI:107926	cell differentiation
>interaction	Etfa	Hadhb	10090.ENSMUSP00000034866	10090.ENSMUSP00000026841	0.318	0	0	0	0.599	0	0.383	0.159	0.839	>node 1 information	Etfa	ENSMUSG00000032314	20.1832	39.3252	29.7542	0.643338	0.818	0.52625	-1.94841	Down	MGI:106092				>node 2 information	Hadhb	ENSMUSG00000059447	12.536	21.3069	16.9215	0.51833	0.658	0.341061	-1.69966	Down	MGI:2136381
>interaction	Flna	Itga9	10090.ENSMUSP00000098997	10090.ENSMUSP00000044227	0	0	0	0	0.053	0.213	0.8	0	0.837	>node 1 information	Flna	ENSMUSG00000031328	38.0143	27.343	32.6786	0.326553	0.844	0.27561	1.39028	Up	MGI:95556	cell proliferation;cell differentiation			>node 2 information	Itga9	ENSMUSG00000039115	5.44719	2.40753	3.92736	0.77397	0.372	0.287917	2.26256	Up	MGI:104756
>interaction	Flnb	Itga9	10090.ENSMUSP00000052020	10090.ENSMUSP00000044227	0	0	0	0	0.053	0.213	0.8	0	0.837	>node 1 information	Flnb	ENSMUSG00000025278	21.4391	12.8181	17.1286	0.50331	0.66	0.332185	1.67256	Up	MGI:2446089	cell differentiation			>node 2 information	Itga9	ENSMUSG00000039115	5.44719	2.40753	3.92736	0.77397	0.372	0.287917	2.26256	Up	MGI:104756
>interaction	Idh2	Ireb2	10090.ENSMUSP00000103007	10090.ENSMUSP00000034843	0.318	0	0	0	0.195	0.062	0.484	0.482	0.837	>node 1 information	Idh2	ENSMUSG00000030541	23.7115	6.32501	15.0183	1.15769	0.628	0.72703	3.74885	Up	MGI:96414	cell proliferation;cell differentiation			>node 2 information	Ireb2	ENSMUSG00000032293	37.5874	54.1261	45.8567	0.36066	0.924	0.33325	-1.44001	Down	MGI:1928268
>interaction	Gnai1	Oxtr	10090.ENSMUSP00000074259	10090.ENSMUSP00000051132	0	0	0	0	0	0.15	0.813	0.056	0.837	>node 1 information	Gnai1	ENSMUSG00000057614	8.8623	19.5502	14.2063	0.752338	0.612	0.460431	-2.206	Down	MGI:95771				>node 2 information	Oxtr	ENSMUSG00000049112	2.47201	0.865303	1.66866	0.962875	0.284	0.273456	2.85681	Up	MGI:109147
>interaction	Csnk1e	Foxo6	10090.ENSMUSP00000113341	10090.ENSMUSP00000099716	0	0	0	0	0	0.047	0.834	0.047	0.836	>node 1 information	Csnk1e	ENSMUSG00000022433	60.3353	41.6457	50.9905	0.366531	0.943	0.345639	1.44878	Up	MGI:1351660				>node 2 information	Foxo6	ENSMUSG00000052135	35.6424	21.263	28.4527	0.505379	0.805	0.40683	1.67626	Up	MGI:2676586
>interaction	Rps6ka6	Ppp1cb	10090.ENSMUSP00000080694	10090.ENSMUSP00000015100	0	0	0	0	0.062	0.072	0.826	0	0.835	>node 1 information	Rps6ka6	ENSMUSG00000025665	11.4844	20.7673	16.1258	0.575653	0.645	0.371296	-1.80831	Down	MGI:1914321				>node 2 information	Ppp1cb	ENSMUSG00000014956	33.4212	51.1162	42.2687	0.418631	0.907	0.379699	-1.52945	Down	MGI:104871
>interaction	Jun	Sirt1	10090.ENSMUSP00000054270	10090.ENSMUSP00000020257	0	0	0	0	0	0.545	0	0.651	0.835	>node 1 information	Jun	ENSMUSG00000052684	51.1912	37.6828	44.437	0.30399	0.917	0.278759	1.35848	Up	MGI:96646	cell proliferation;cell differentiation			>node 2 information	Sirt1	ENSMUSG00000020063	19.5441	31.9323	25.7382	0.481316	0.777	0.373982	-1.63386	Down	MGI:2135607	cell proliferation;cell differentiation	abnormal male fertility;abnormal spermatogenesis
>interaction	Pla2g1b	Pla2g5	10090.ENSMUSP00000031495	10090.ENSMUSP00000030524	0	0	0	0.802	0	0	0.8	0.867	0.834	>node 1 information	Pla2g1b	ENSMUSG00000029522	13.8115	7.03265	10.4221	0.650432	0.535	0.347981	1.96391	Up	MGI:101842				>node 2 information	Pla2g5	ENSMUSG00000041193	23.7082	15.2927	19.5005	0.431554	0.697	0.300793	1.5503	Up	MGI:101899
>interaction	Ash1l	Asf1b	10090.ENSMUSP00000088451	10090.ENSMUSP00000005607	0	0	0	0	0.067	0.749	0	0.349	0.834	>node 1 information	Ash1l	ENSMUSG00000028053	20.181	29.1935	24.6872	0.365067	0.766	0.279641	-1.44658	Down	MGI:2183158		abnormal male fertility		>node 2 information	Asf1b	ENSMUSG00000005470	72.1413	101.487	86.8141	0.338029	0.99	0.334649	-1.40678	Down	MGI:1914179
>interaction	Ppp1cc	Rps6ka6	10090.ENSMUSP00000099587	10090.ENSMUSP00000080694	0	0	0	0	0.062	0.065	0.826	0	0.834	>node 1 information	Ppp1cc	ENSMUSG00000004455	31.299	43.4603	37.3796	0.325345	0.88	0.286304	-1.38855	Down	MGI:104872	cell differentiation	abnormal male fertility		>node 2 information	Rps6ka6	ENSMUSG00000025665	11.4844	20.7673	16.1258	0.575653	0.645	0.371296	-1.80831	Down	MGI:1914321
>interaction	Uba6	Ube2e3	10090.ENSMUSP00000035328	10090.ENSMUSP00000028398	0	0	0	0	0.051	0.58	0.135	0.576	0.834	>node 1 information	Uba6	ENSMUSG00000035898	16.5199	28.092	22.3059	0.51879	0.736	0.381829	-1.70049	Down	MGI:1913894				>node 2 information	Ube2e3	ENSMUSG00000027011	27.3756	45.9959	36.6857	0.507562	0.876	0.444624	-1.68018	Down	MGI:107412
>interaction	Shc4	Epha2	10090.ENSMUSP00000043146	10090.ENSMUSP00000006614	0	0	0	0	0	0.114	0.817	0.058	0.834	>node 1 information	Shc4	ENSMUSG00000035109	2.03214	6.58012	4.30613	1.05616	0.384	0.405567	-3.23803	Down	MGI:2655364	cell proliferation;cell differentiation			>node 2 information	Epha2	ENSMUSG00000006445	22.9391	11.3933	17.1662	0.672589	0.661	0.444581	2.01339	Up	MGI:95278	cell proliferation;cell differentiation
>interaction	Itga9	Actn1	10090.ENSMUSP00000044227	10090.ENSMUSP00000021554	0	0	0	0	0.055	0.11	0.8	0.129	0.833	>node 1 information	Itga9	ENSMUSG00000039115	5.44719	2.40753	3.92736	0.77397	0.372	0.287917	2.26256	Up	MGI:104756				>node 2 information	Actn1	ENSMUSG00000015143	14.1553	7.81392	10.9846	0.577297	0.547	0.315781	1.81155	Up	MGI:2137706	cell differentiation
>interaction	Smarca5	Top2b	10090.ENSMUSP00000044361	10090.ENSMUSP00000017629	0	0	0	0	0.388	0.418	0.398	0.306	0.831	>node 1 information	Smarca5	ENSMUSG00000031715	17.5076	26.9327	22.2202	0.424169	0.735	0.311764	-1.53834	Down	MGI:1935129				>node 2 information	Top2b	ENSMUSG00000017485	11.6204	23.5306	17.5755	0.677659	0.667	0.451999	-2.02494	Down	MGI:98791	cell differentiation
>interaction	Morf4l2	Hdac2	10090.ENSMUSP00000033797	10090.ENSMUSP00000019911	0	0	0	0	0.167	0.663	0	0.447	0.831	>node 1 information	Morf4l2	ENSMUSG00000031422	34.8959	48.7257	41.8108	0.330771	0.906	0.299679	-1.39632	Down	MGI:1927167				>node 2 information	Hdac2	ENSMUSG00000019777	62.0497	84.1093	73.0795	0.301858	0.981	0.296122	-1.35552	Down	MGI:1097691	cell proliferation;cell differentiation
>interaction	Ppp1cc	Gys1	10090.ENSMUSP00000099587	10090.ENSMUSP00000003964	0	0	0	0	0.055	0.101	0.8	0.127	0.831	>node 1 information	Ppp1cc	ENSMUSG00000004455	31.299	43.4603	37.3796	0.325345	0.88	0.286304	-1.38855	Down	MGI:104872	cell differentiation	abnormal male fertility		>node 2 information	Gys1	ENSMUSG00000003865	16.7763	9.26521	13.0208	0.576855	0.589	0.339768	1.81068	Up	MGI:101805
>interaction	Gmps	Nop58	10090.ENSMUSP00000029405	10090.ENSMUSP00000027174	0	0	0	0	0.83	0	0	0	0.83	>node 1 information	Gmps	ENSMUSG00000027823	30.2407	41.7003	35.9705	0.318583	0.871	0.277486	-1.37895	Down	MGI:2448526				>node 2 information	Nop58	ENSMUSG00000026020	38.1776	55.3223	46.7499	0.366732	0.929	0.340694	-1.44908	Down	MGI:1933184
>interaction	Tst	Mpst	10090.ENSMUSP00000055743	10090.ENSMUSP00000043061	0	0	0.527	0.969	0.164	0	0.8	0.427	0.83	>node 1 information	Tst	ENSMUSG00000044986	33.0731	20.0144	26.5437	0.491969	0.786	0.386688	1.65247	Up	MGI:98852	cell differentiation			>node 2 information	Mpst	ENSMUSG00000071711	23.8163	37.2155	30.5159	0.439089	0.825	0.362249	-1.56261	Down	MGI:2179733		abnormal male fertility
>interaction	Fscn1	Gsn	10090.ENSMUSP00000031565	10090.ENSMUSP00000028239	0	0	0	0	0	0.213	0.72	0.289	0.829	>node 1 information	Fscn1	ENSMUSG00000029581	42.049	25.4401	33.7445	0.492195	0.853	0.419842	1.65286	Up	MGI:1352745				>node 2 information	Gsn	ENSMUSG00000026879	13.0025	7.57822	10.2904	0.527122	0.533	0.280956	1.71577	Up	MGI:95851
>interaction	Cul3	Klhl10	10090.ENSMUSP00000130738	10090.ENSMUSP00000001599	0	0	0	0	0.055	0.69	0.217	0.343	0.829	>node 1 information	Cul3	ENSMUSG00000004364	46.4411	68.4015	57.4213	0.382443	0.959	0.366763	-1.47287	Down	MGI:1347360	cell differentiation			>node 2 information	Klhl10	ENSMUSG00000001558	22.3142	36.0949	29.2046	0.471868	0.812	0.383157	-1.61758	Down	MGI:2181067	cell differentiation	abnormal male fertility
>interaction	Ash1l	Pafah1b1	10090.ENSMUSP00000088451	10090.ENSMUSP00000021091	0	0	0	0	0.207	0.763	0	0.158	0.828	>node 1 information	Ash1l	ENSMUSG00000028053	20.181	29.1935	24.6872	0.365067	0.766	0.279641	-1.44658	Down	MGI:2183158		abnormal male fertility		>node 2 information	Pafah1b1	ENSMUSG00000020745	37.7155	55.4333	46.5744	0.380419	0.928	0.353029	-1.46978	Down	MGI:109520	cell proliferation;cell differentiation	abnormal male fertility
>interaction	Usp14	Cops5	10090.ENSMUSP00000089728	10090.ENSMUSP00000027050	0	0	0	0	0.285	0.645	0	0.378	0.828	>node 1 information	Usp14	ENSMUSG00000047879	17.3202	26.1367	21.7284	0.405758	0.728	0.295392	-1.50903	Down	MGI:1928898		abnormal male fertility		>node 2 information	Cops5	ENSMUSG00000025917	26.1005	36.3417	31.2211	0.328022	0.832	0.272914	-1.39238	Down	MGI:1349415
>interaction	Anapc10	Nudt21	10090.ENSMUSP00000048244	10090.ENSMUSP00000034204	0	0	0	0	0	0.828	0	0	0.828	>node 1 information	Anapc10	ENSMUSG00000036977	9.24782	16.1556	12.7017	0.543846	0.583	0.317062	-1.74696	Down	MGI:1916249				>node 2 information	Nudt21	ENSMUSG00000031754	3.47487	8.94399	6.20943	0.880776	0.434	0.382257	-2.57391	Down	MGI:1915469
>interaction	Ash1l	Tada2b	10090.ENSMUSP00000088451	10090.ENSMUSP00000031097	0	0	0	0	0.099	0.718	0	0.38	0.828	>node 1 information	Ash1l	ENSMUSG00000028053	20.181	29.1935	24.6872	0.365067	0.766	0.279641	-1.44658	Down	MGI:2183158		abnormal male fertility		>node 2 information	Tada2b	ENSMUSG00000029196	6.34942	11.2812	8.81531	0.559456	0.497	0.27805	-1.77673	Down	MGI:3035274
>interaction	Ar	Sirt1	10090.ENSMUSP00000052648	10090.ENSMUSP00000020257	0	0	0	0	0	0.111	0.528	0.624	0.828	>node 1 information	Ar	ENSMUSG00000046532	4.1779	8.24055	6.20922	0.654293	0.434	0.283963	-1.97241	Down	MGI:88064	cell proliferation;cell differentiation	abnormal male fertility;abnormal spermatogenesis		>node 2 information	Sirt1	ENSMUSG00000020063	19.5441	31.9323	25.7382	0.481316	0.777	0.373982	-1.63386	Down	MGI:2135607	cell proliferation;cell differentiation	abnormal male fertility;abnormal spermatogenesis
>interaction	Csnk1e	Atr	10090.ENSMUSP00000113341	10090.ENSMUSP00000034980	0	0	0	0	0.061	0.769	0	0.267	0.827	>node 1 information	Csnk1e	ENSMUSG00000022433	60.3353	41.6457	50.9905	0.366531	0.943	0.345639	1.44878	Up	MGI:1351660				>node 2 information	Atr	ENSMUSG00000032409	23.1463	41.1559	32.1511	0.560155	0.84	0.47053	-1.77808	Down	MGI:108028
>interaction	Jun	Ar	10090.ENSMUSP00000054270	10090.ENSMUSP00000052648	0	0	0	0	0	0.169	0.201	0.76	0.827	>node 1 information	Jun	ENSMUSG00000052684	51.1912	37.6828	44.437	0.30399	0.917	0.278759	1.35848	Up	MGI:96646	cell proliferation;cell differentiation			>node 2 information	Ar	ENSMUSG00000046532	4.1779	8.24055	6.20922	0.654293	0.434	0.283963	-1.97241	Down	MGI:88064	cell proliferation;cell differentiation	abnormal male fertility;abnormal spermatogenesis
>interaction	Rab11a	Myh9	10090.ENSMUSP00000129163	10090.ENSMUSP00000016771	0	0	0	0	0.054	0.679	0.074	0.454	0.826	>node 1 information	Rab11a	ENSMUSG00000004771	33.5683	56.4305	44.9994	0.508056	0.92	0.467411	-1.68107	Down	MGI:1858202	cell differentiation			>node 2 information	Myh9	ENSMUSG00000022443	52.4866	38.5127	45.4997	0.307121	0.922	0.283166	1.36284	Up	MGI:107717	cell differentiation
>interaction	Rcor2	Hdac2	10090.ENSMUSP00000108996	10090.ENSMUSP00000019911	0	0	0	0	0.128	0.537	0	0.601	0.825	>node 1 information	Rcor2	ENSMUSG00000024968	50.5529	32.79	41.6715	0.426261	0.905	0.385766	1.54172	Up	MGI:1859854				>node 2 information	Hdac2	ENSMUSG00000019777	62.0497	84.1093	73.0795	0.301858	0.981	0.296122	-1.35552	Down	MGI:1097691	cell proliferation;cell differentiation
>interaction	Ccne2	Anapc10	10090.ENSMUSP00000103960	10090.ENSMUSP00000048244	0	0	0	0	0.053	0	0.8	0.15	0.825	>node 1 information	Ccne2	ENSMUSG00000028212	9.17713	18.8589	14.018	0.690666	0.609	0.420616	-2.05499	Down	MGI:1329034		abnormal male fertility;abnormal spermatogenesis		>node 2 information	Anapc10	ENSMUSG00000036977	9.24782	16.1556	12.7017	0.543846	0.583	0.317062	-1.74696	Down	MGI:1916249
>interaction	Hfm1	Ythdc2	10090.ENSMUSP00000108310	10090.ENSMUSP00000048340	0	0	0	0	0.127	0.399	0	0.694	0.825	>node 1 information	Hfm1	ENSMUSG00000043410	2.66377	6.26674	4.46525	0.80689	0.389	0.31388	-2.35258	Down	MGI:3036246	cell differentiation	abnormal male fertility;abnormal spermatogenesis		>node 2 information	Ythdc2	ENSMUSG00000034653	6.29331	12.2139	9.25361	0.639814	0.508	0.325026	-1.94078	Down	MGI:2448561		abnormal male fertility
>interaction	Ncor2	Sirt1	10090.ENSMUSP00000083250	10090.ENSMUSP00000020257	0	0	0	0	0.052	0.456	0	0.686	0.825	>node 1 information	Ncor2	ENSMUSG00000029478	77.2072	56.488	66.8476	0.309947	0.974	0.301888	1.36679	Up	MGI:1337080	cell proliferation;cell differentiation			>node 2 information	Sirt1	ENSMUSG00000020063	19.5441	31.9323	25.7382	0.481316	0.777	0.373982	-1.63386	Down	MGI:2135607	cell proliferation;cell differentiation	abnormal male fertility;abnormal spermatogenesis
>interaction	Gls	Ggt7	10090.ENSMUSP00000110158	10090.ENSMUSP00000029131	0	0	0	0	0.072	0	0.8	0.129	0.824	>node 1 information	Gls	ENSMUSG00000026103	29.0713	46.0093	37.5403	0.451195	0.881	0.397503	-1.58264	Down	MGI:95752				>node 2 information	Ggt7	ENSMUSG00000027603	8.76308	4.19023	6.47666	0.706051	0.44	0.310663	2.09131	Up	MGI:1913385
>interaction	Rock2	Ppp1cb	10090.ENSMUSP00000020904	10090.ENSMUSP00000015100	0	0	0	0	0.138	0	0.8	0.059	0.823	>node 1 information	Rock2	ENSMUSG00000020580	19.4463	28.964	24.2051	0.39321	0.76	0.298839	-1.48944	Down	MGI:107926	cell differentiation			>node 2 information	Ppp1cb	ENSMUSG00000014956	33.4212	51.1162	42.2687	0.418631	0.907	0.379699	-1.52945	Down	MGI:104871
>interaction	Itga9	Lamb1	10090.ENSMUSP00000044227	10090.ENSMUSP00000002979	0	0	0	0	0.083	0	0.8	0.114	0.823	>node 1 information	Itga9	ENSMUSG00000039115	5.44719	2.40753	3.92736	0.77397	0.372	0.287917	2.26256	Up	MGI:104756				>node 2 information	Lamb1	ENSMUSG00000002900	39.1806	27.4569	33.3188	0.351865	0.85	0.299085	1.42699	Up	MGI:96743	cell differentiation
>interaction	Ppp1cb	Gys1	10090.ENSMUSP00000015100	10090.ENSMUSP00000003964	0	0	0	0	0.055	0.077	0.8	0.103	0.822	>node 1 information	Ppp1cb	ENSMUSG00000014956	33.4212	51.1162	42.2687	0.418631	0.907	0.379699	-1.52945	Down	MGI:104871				>node 2 information	Gys1	ENSMUSG00000003865	16.7763	9.26521	13.0208	0.576855	0.589	0.339768	1.81068	Up	MGI:101805
>interaction	Mrps14	Rpl22l1	10090.ENSMUSP00000120075	10090.ENSMUSP00000043111	0	0	0	0	0.809	0	0	0.106	0.822	>node 1 information	Mrps14	ENSMUSG00000058267	9.76211	16.5502	13.1562	0.515963	0.591	0.304934	-1.69535	Down	MGI:1928141				>node 2 information	Rpl22l1	ENSMUSG00000039221	9.26907	15.9785	12.6238	0.531489	0.581	0.308795	-1.72385	Down	MGI:1915278
>interaction	Itga9	Col1a2	10090.ENSMUSP00000044227	10090.ENSMUSP00000031668	0	0	0	0	0.071	0.073	0.8	0.09	0.822	>node 1 information	Itga9	ENSMUSG00000039115	5.44719	2.40753	3.92736	0.77397	0.372	0.287917	2.26256	Up	MGI:104756				>node 2 information	Col1a2	ENSMUSG00000029661	7.73864	3.26641	5.50253	0.81276	0.416	0.338108	2.36916	Up	MGI:88468
>interaction	Lama3	Itga9	10090.ENSMUSP00000089703	10090.ENSMUSP00000044227	0	0	0	0	0.052	0	0.8	0.134	0.821	>node 1 information	Lama3	ENSMUSG00000024421	14.913	8.62674	11.7699	0.534098	0.565	0.301765	1.72869	Up	MGI:99909				>node 2 information	Itga9	ENSMUSG00000039115	5.44719	2.40753	3.92736	0.77397	0.372	0.287917	2.26256	Up	MGI:104756
>interaction	Sycp3	Dazl	10090.ENSMUSP00000020252	10090.ENSMUSP00000010736	0	0	0	0	0.077	0	0	0.813	0.821	>node 1 information	Sycp3	ENSMUSG00000020059	24.6262	56.2319	40.429	0.781757	0.898	0.702018	-2.28342	Down	MGI:109542	cell differentiation	abnormal male fertility		>node 2 information	Dazl	ENSMUSG00000010592	65.9529	105.291	85.6219	0.459439	0.989	0.454386	-1.59646	Down	MGI:1342328	cell differentiation	abnormal male fertility
>interaction	Ppp1cc	Rock1	10090.ENSMUSP00000099587	10090.ENSMUSP00000069549	0	0	0	0	0.091	0	0.8	0.098	0.821	>node 1 information	Ppp1cc	ENSMUSG00000004455	31.299	43.4603	37.3796	0.325345	0.88	0.286304	-1.38855	Down	MGI:104872	cell differentiation	abnormal male fertility		>node 2 information	Rock1	ENSMUSG00000024290	18.0534	29.2585	23.656	0.473669	0.752	0.356199	-1.62066	Down	MGI:107927	cell differentiation
>interaction	Nt5e	Nt5c3	10090.ENSMUSP00000034992	10090.ENSMUSP00000031793	0	0	0	0	0	0	0.8	0.14	0.82	>node 1 information	Nt5e	ENSMUSG00000032420	24.2773	34.4179	29.3476	0.345534	0.814	0.281265	-1.4177	Down	MGI:99782				>node 2 information	Nt5c3	ENSMUSG00000029780	26.1975	39.1759	32.6867	0.397054	0.844	0.335114	-1.49541	Down	MGI:1927186
>interaction	Acsl6	Ppt1	10090.ENSMUSP00000104532	10090.ENSMUSP00000030412	0	0	0	0	0.052	0.044	0.8	0.128	0.82	>node 1 information	Acsl6	ENSMUSG00000020333	1.88931	6.87436	4.38183	1.13766	0.386	0.439138	-3.63856	Down	MGI:894291	cell proliferation;cell differentiation			>node 2 information	Ppt1	ENSMUSG00000028657	61.7311	82.8567	72.2939	0.292218	0.98	0.286374	-1.34222	Down	MGI:1298204
>interaction	Smarca5	Sirt1	10090.ENSMUSP00000044361	10090.ENSMUSP00000020257	0	0	0	0	0.131	0.074	0.72	0.296	0.82	>node 1 information	Smarca5	ENSMUSG00000031715	17.5076	26.9327	22.2202	0.424169	0.735	0.311764	-1.53834	Down	MGI:1935129				>node 2 information	Sirt1	ENSMUSG00000020063	19.5441	31.9323	25.7382	0.481316	0.777	0.373982	-1.63386	Down	MGI:2135607	cell proliferation;cell differentiation	abnormal male fertility;abnormal spermatogenesis
>interaction	Ldha	Idh2	10090.ENSMUSP00000103267	10090.ENSMUSP00000103007	0.318	0	0	0	0.281	0.28	0	0.548	0.819	>node 1 information	Ldha	ENSMUSG00000063229	22.1962	14.0589	18.1275	0.448891	0.675	0.303002	1.5788	Up	MGI:96759				>node 2 information	Idh2	ENSMUSG00000030541	23.7115	6.32501	15.0183	1.15769	0.628	0.72703	3.74885	Up	MGI:96414	cell proliferation;cell differentiation
>interaction	Utp18	Esf1	10090.ENSMUSP00000068103	10090.ENSMUSP00000036523	0	0	0	0	0.763	0	0	0.266	0.818	>node 1 information	Utp18	ENSMUSG00000054079	19.3802	41.494	30.4371	0.726541	0.824	0.59867	-2.14105	Down	MGI:1923402				>node 2 information	Esf1	ENSMUSG00000045624	21.234	33.9415	27.5877	0.460621	0.797	0.367115	-1.59845	Down	MGI:1913830
>interaction	Mapk10	Mapk9	10090.ENSMUSP00000108468	10090.ENSMUSP00000020634	0	0	0.527	0.986	0.113	0	0.8	0.781	0.818	>node 1 information	Mapk10	ENSMUSG00000046709	14.6367	8.59425	11.6155	0.520207	0.561	0.291836	1.70308	Up	MGI:1346863	cell differentiation			>node 2 information	Mapk9	ENSMUSG00000020366	27.7559	40.878	34.3169	0.38238	0.857	0.327699	-1.47277	Down	MGI:1346862	cell differentiation
>interaction	Hist1h3e	Hdac2	10090.ENSMUSP00000100739	10090.ENSMUSP00000019911	0.318	0	0	0	0.052	0.402	0	0.584	0.817	>node 1 information	Hist1h3e	ENSMUSG00000069273	2.38594	0.341943	1.36394	1.4986	0.266	0.398626	6.9776	Up	MGI:2448326				>node 2 information	Hdac2	ENSMUSG00000019777	62.0497	84.1093	73.0795	0.301858	0.981	0.296122	-1.35552	Down	MGI:1097691	cell proliferation;cell differentiation
>interaction	Birc2	Ctsl	10090.ENSMUSP00000091422	10090.ENSMUSP00000021933	0	0	0	0	0	0	0.8	0.127	0.817	>node 1 information	Birc2	ENSMUSG00000057367	26.647	38.5157	32.5814	0.364279	0.844	0.307451	-1.4454	Down	MGI:1197009				>node 2 information	Ctsl	ENSMUSG00000021477	76.088	99.8557	87.9719	0.270174	0.99	0.267472	-1.31237	Down	MGI:88564	cell proliferation	abnormal spermatogenesis
>interaction	Ythdc2	Nudt21	10090.ENSMUSP00000048340	10090.ENSMUSP00000034204	0	0	0	0	0.077	0.783	0	0.158	0.816	>node 1 information	Ythdc2	ENSMUSG00000034653	6.29331	12.2139	9.25361	0.639814	0.508	0.325026	-1.94078	Down	MGI:2448561		abnormal male fertility		>node 2 information	Nudt21	ENSMUSG00000031754	3.47487	8.94399	6.20943	0.880776	0.434	0.382257	-2.57391	Down	MGI:1915469
>interaction	Hdac2	H3f3b	10090.ENSMUSP00000019911	10090.ENSMUSP00000016703	0.318	0	0	0	0.094	0.402	0	0.561	0.816	>node 1 information	Hdac2	ENSMUSG00000019777	62.0497	84.1093	73.0795	0.301858	0.981	0.296122	-1.35552	Down	MGI:1097691	cell proliferation;cell differentiation			>node 2 information	H3f3b	ENSMUSG00000016559	60.638	81.5386	71.0883	0.294009	0.979	0.287835	-1.34468	Down	MGI:1101768	cell proliferation;cell differentiation	abnormal male fertility
>interaction	Eif2ak2	Ppp1cb	10090.ENSMUSP00000024884	10090.ENSMUSP00000015100	0	0	0	0	0	0.108	0.8	0.056	0.816	>node 1 information	Eif2ak2	ENSMUSG00000024079	4.03867	15.6903	9.86449	1.18117	0.523	0.617752	-3.88502	Down	MGI:1353449	cell proliferation;cell differentiation			>node 2 information	Ppp1cb	ENSMUSG00000014956	33.4212	51.1162	42.2687	0.418631	0.907	0.379699	-1.52945	Down	MGI:104871
>interaction	Bmi1	Hdac2	10090.ENSMUSP00000028071	10090.ENSMUSP00000019911	0	0	0	0	0.117	0.107	0.72	0.266	0.816	>node 1 information	Bmi1	ENSMUSG00000026739	17.039	25.2217	21.1303	0.387249	0.721	0.279206	-1.48023	Down	MGI:88174	cell proliferation;cell differentiation			>node 2 information	Hdac2	ENSMUSG00000019777	62.0497	84.1093	73.0795	0.301858	0.981	0.296122	-1.35552	Down	MGI:1097691	cell proliferation;cell differentiation
>interaction	Slc38a1	Slc38a2	10090.ENSMUSP00000085799	10090.ENSMUSP00000023099	0	0	0	0.936	0.067	0	0.8	0.833	0.815	>node 1 information	Slc38a1	ENSMUSG00000023169	3.66415	1.52801	2.59608	0.822833	0.327	0.269066	2.39799	Up	MGI:2145895				>node 2 information	Slc38a2	ENSMUSG00000022462	31.5606	45.2878	38.4242	0.357254	0.886	0.316527	-1.43495	Down	MGI:1915010
>interaction	Smc4	Bub1	10090.ENSMUSP00000047872	10090.ENSMUSP00000028858	0	0	0	0	0.707	0.115	0	0.345	0.815	>node 1 information	Smc4	ENSMUSG00000034349	22.8962	42.0519	32.474	0.589877	0.842	0.496677	-1.83663	Down	MGI:1917349				>node 2 information	Bub1	ENSMUSG00000027379	25.1238	36.3607	30.7422	0.36552	0.828	0.30265	-1.44726	Down	MGI:1100510		abnormal male fertility;abnormal spermatogenesis
>interaction	Ube2e3	Ube2e1	10090.ENSMUSP00000028398	10090.ENSMUSP00000022296	0	0	0	0.982	0.111	0	0.8	0.347	0.815	>node 1 information	Ube2e3	ENSMUSG00000027011	27.3756	45.9959	36.6857	0.507562	0.876	0.444624	-1.68018	Down	MGI:107412				>node 2 information	Ube2e1	ENSMUSG00000021774	30.807	46.123	38.465	0.39818	0.887	0.353186	-1.49716	Down	MGI:107411
>interaction	Kitl	Skp1a	10090.ENSMUSP00000100920	10090.ENSMUSP00000038744	0	0	0	0	0	0	0	0.815	0.815	>node 1 information	Kitl	ENSMUSG00000019966	29.851	43.7382	36.7946	0.377425	0.876	0.330624	-1.46522	Down	MGI:96974	cell proliferation;cell differentiation	abnormal male fertility;abnormal spermatogenesis		>node 2 information	Skp1a	ENSMUSG00000036309	50.0088	80.2426	65.1257	0.464238	0.972	0.451239	-1.60457	Down	MGI:103575
>interaction	Adss	Aprt	10090.ENSMUSP00000016105	10090.ENSMUSP00000006764	0	0	0	0	0.062	0.424	0.383	0.511	0.815	>node 1 information	Adss	ENSMUSG00000015961	43.4678	60.8084	52.1381	0.33259	0.946	0.31463	-1.39893	Down	MGI:87948				>node 2 information	Aprt	ENSMUSG00000006589	65.9957	46.4001	56.1979	0.348689	0.956	0.333347	1.42232	Up	MGI:88061
>interaction	Creb3l1	Atf1	10090.ENSMUSP00000028663	10090.ENSMUSP00000023769	0	0	0	0.649	0	0.099	0.8	0.094	0.815	>node 1 information	Creb3l1	ENSMUSG00000027230	7.9394	3.29871	5.61906	0.825884	0.419	0.346046	2.40682	Up	MGI:1347062	cell differentiation			>node 2 information	Atf1	ENSMUSG00000023027	22.6897	33.3599	28.0248	0.380741	0.802	0.305355	-1.47027	Down	MGI:1298366	cell differentiation
>interaction	Nrip3	Rad23a	10090.ENSMUSP00000033331	10090.ENSMUSP00000003911	0	0	0	0	0.055	0.682	0	0.436	0.815	>node 1 information	Nrip3	ENSMUSG00000034825	4.11704	8.01064	6.06384	0.642101	0.43	0.276104	-1.94573	Down	MGI:1925843				>node 2 information	Rad23a	ENSMUSG00000003813	35.2558	23.8675	29.5617	0.385239	0.816	0.314355	1.47715	Up	MGI:105126
>interaction	Gls	Dld	10090.ENSMUSP00000110158	10090.ENSMUSP00000106481	0	0	0	0	0.074	0	0.8	0.081	0.815	>node 1 information	Gls	ENSMUSG00000026103	29.0713	46.0093	37.5403	0.451195	0.881	0.397503	-1.58264	Down	MGI:95752				>node 2 information	Dld	ENSMUSG00000020664	25.2514	39.3389	32.2951	0.436211	0.841	0.366853	-1.55789	Down	MGI:107450	cell differentiation
>interaction	Kif18b	Pafah1b1	10090.ENSMUSP00000021311	10090.ENSMUSP00000021091	0	0	0	0	0.104	0.115	0.72	0.267	0.815	>node 1 information	Kif18b	ENSMUSG00000051378	34.2817	21.665	27.9733	0.451026	0.801	0.361272	1.58235	Up	MGI:2446979				>node 2 information	Pafah1b1	ENSMUSG00000020745	37.7155	55.4333	46.5744	0.380419	0.928	0.353029	-1.46978	Down	MGI:109520	cell proliferation;cell differentiation	abnormal male fertility
>interaction	Sirt1	Cdk1	10090.ENSMUSP00000020257	10090.ENSMUSP00000020099	0	0	0	0	0.051	0.563	0	0.586	0.814	>node 1 information	Sirt1	ENSMUSG00000020063	19.5441	31.9323	25.7382	0.481316	0.777	0.373982	-1.63386	Down	MGI:2135607	cell proliferation;cell differentiation	abnormal male fertility;abnormal spermatogenesis		>node 2 information	Cdk1	ENSMUSG00000019942	57.6102	40.4389	49.0245	0.350259	0.936	0.327843	1.42462	Up	MGI:88351	cell proliferation;cell differentiation
>interaction	Senp2	Dvl2	10090.ENSMUSP00000023561	10090.ENSMUSP00000019362	0	0	0	0	0.08	0	0.8	0.069	0.814	>node 1 information	Senp2	ENSMUSG00000022855	15.9426	29.4966	22.7196	0.596577	0.741	0.442064	-1.85018	Down	MGI:1923076	cell differentiation			>node 2 information	Dvl2	ENSMUSG00000020888	54.7571	39.3269	47.042	0.328009	0.93	0.305048	1.39236	Up	MGI:106613	cell proliferation
>interaction	Ssb	Ddx56	10090.ENSMUSP00000088365	10090.ENSMUSP00000004507	0	0	0	0	0.811	0	0	0.058	0.814	>node 1 information	Ssb	ENSMUSG00000068882	48.4089	70.3089	59.3589	0.368942	0.963	0.355291	-1.4524	Down	MGI:98423				>node 2 information	Ddx56	ENSMUSG00000004393	48.5664	33.3119	40.9391	0.372614	0.901	0.335725	1.45793	Up	MGI:1277172	cell differentiation
>interaction	Eif3m	Psmd14	10090.ENSMUSP00000028592	10090.ENSMUSP00000028278	0	0	0	0	0.392	0.684	0	0.107	0.813	>node 1 information	Eif3m	ENSMUSG00000027170	4.91709	9.44787	7.18248	0.63081	0.46	0.290173	-1.92144	Down	MGI:1351744				>node 2 information	Psmd14	ENSMUSG00000026914	35.7514	55.7193	45.7353	0.436597	0.924	0.403415	-1.55852	Down	MGI:1913284
>interaction	Ndfip1	Slc11a2	10090.ENSMUSP00000025293	10090.ENSMUSP00000023774	0	0	0	0	0.1	0.305	0	0.725	0.813	>node 1 information	Ndfip1	ENSMUSG00000024425	102.863	148.349	125.606	0.362132	0.998	0.361408	-1.4422	Down	MGI:1929601	cell proliferation;cell differentiation			>node 2 information	Slc11a2	ENSMUSG00000023030	30.148	46.0946	38.1213	0.418312	0.885	0.370206	-1.52894	Down	MGI:1345279	cell differentiation
>interaction	Ldha	Sucla2	10090.ENSMUSP00000103267	10090.ENSMUSP00000022706	0.318	0	0	0	0.252	0.115	0.484	0.322	0.813	>node 1 information	Ldha	ENSMUSG00000063229	22.1962	14.0589	18.1275	0.448891	0.675	0.303002	1.5788	Up	MGI:96759				>node 2 information	Sucla2	ENSMUSG00000022110	27.9656	47.012	37.4888	0.508056	0.88	0.447089	-1.68107	Down	MGI:1306775
>interaction	Shfm1	Cops2	10090.ENSMUSP00000040741	10090.ENSMUSP00000028635	0	0	0	0	0.052	0.802	0	0.082	0.812	>node 1 information	Shfm1	ENSMUSG00000042541	43.394	60.2521	51.8231	0.325301	0.945	0.30741	-1.38849	Down	MGI:109238				>node 2 information	Cops2	ENSMUSG00000027206	25.3319	35.7837	30.5578	0.342034	0.826	0.28252	-1.41259	Down	MGI:1330276	cell proliferation;cell differentiation
>interaction	Mmp2	Mmp9	10090.ENSMUSP00000034187	10090.ENSMUSP00000017881	0	0	0	0.936	0	0	0.8	0.95	0.812	>node 1 information	Mmp2	ENSMUSG00000031740	40.2116	13.2712	26.7414	1.00744	0.787	0.792857	3.02999	Up	MGI:97009	cell proliferation;cell differentiation			>node 2 information	Mmp9	ENSMUSG00000017737	8.08981	4.25239	6.1711	0.621837	0.433	0.269256	1.90241	Up	MGI:97011	cell proliferation
>interaction	Cebpa	Pparg	10090.ENSMUSP00000096129	10090.ENSMUSP00000000450	0	0	0	0	0	0.047	0	0.81	0.811	>node 1 information	Cebpa	ENSMUSG00000034957	11.9635	5.90369	8.9336	0.678317	0.5	0.339159	2.02644	Up	MGI:99480	cell proliferation;cell differentiation			>node 2 information	Pparg	ENSMUSG00000000440	0.886802	3.31489	2.10085	1.15577	0.307	0.35482	-3.73803	Down	MGI:97747	cell proliferation;cell differentiation
>interaction	Top2a	Smarca5	10090.ENSMUSP00000068896	10090.ENSMUSP00000044361	0	0	0	0	0.301	0.418	0.398	0.321	0.811	>node 1 information	Top2a	ENSMUSG00000020914	47.0462	64.8343	55.9402	0.317984	0.955	0.303675	-1.3781	Down	MGI:98790	cell differentiation			>node 2 information	Smarca5	ENSMUSG00000031715	17.5076	26.9327	22.2202	0.424169	0.735	0.311764	-1.53834	Down	MGI:1935129
>interaction	Cbx5	Rbbp4	10090.ENSMUSP00000104441	10090.ENSMUSP00000099658	0	0	0	0	0.139	0.101	0.72	0.231	0.811	>node 1 information	Cbx5	ENSMUSG00000009575	13.9573	22.5843	18.2708	0.472174	0.677	0.319662	-1.6181	Down	MGI:109372				>node 2 information	Rbbp4	ENSMUSG00000057236	103.011	139.545	121.278	0.301242	0.997	0.300338	-1.35466	Down	MGI:1194912
>interaction	Aldh1a2	Gldc	10090.ENSMUSP00000034723	10090.ENSMUSP00000025778	0	0	0	0	0.069	0.102	0.563	0.544	0.811	>node 1 information	Aldh1a2	ENSMUSG00000013584	27.7565	40.2735	34.015	0.367985	0.855	0.314627	-1.45096	Down	MGI:107928	cell proliferation;cell differentiation			>node 2 information	Gldc	ENSMUSG00000024827	25.6281	15.4695	20.5488	0.494365	0.712	0.351988	1.65669	Up	MGI:1341155
>interaction	Gldc	Aldh1a7	10090.ENSMUSP00000025778	10090.ENSMUSP00000025656	0	0	0	0	0.069	0.102	0.563	0.544	0.811	>node 1 information	Gldc	ENSMUSG00000024827	25.6281	15.4695	20.5488	0.494365	0.712	0.351988	1.65669	Up	MGI:1341155				>node 2 information	Aldh1a7	ENSMUSG00000024747	5.35988	10.4797	7.91979	0.646459	0.476	0.307715	-1.95521	Down	MGI:1347050
>interaction	Itga9	Col6a2	10090.ENSMUSP00000044227	10090.ENSMUSP00000001181	0	0	0	0	0.052	0	0.8	0.081	0.81	>node 1 information	Itga9	ENSMUSG00000039115	5.44719	2.40753	3.92736	0.77397	0.372	0.287917	2.26256	Up	MGI:104756				>node 2 information	Col6a2	ENSMUSG00000020241	9.87511	3.93759	6.90635	0.859719	0.453	0.389453	2.50791	Up	MGI:88460
>interaction	Fxyd1	Fxyd2	10090.ENSMUSP00000048460	10090.ENSMUSP00000035429	0	0	0	0.914	0	0	0.8	0.643	0.81	>node 1 information	Fxyd1	ENSMUSG00000036570	10.4663	3.31664	6.89147	1.03747	0.452	0.468934	3.15569	Up	MGI:1889273				>node 2 information	Fxyd2	ENSMUSG00000059412	8.92973	3.94529	6.43751	0.774281	0.439	0.339909	2.26339	Up	MGI:1195260
>interaction	Smek1	Ppp4r4	10090.ENSMUSP00000129654	10090.ENSMUSP00000021631	0	0	0	0	0	0	0.72	0.346	0.809	>node 1 information	Smek1	ENSMUSG00000041846	28.5846	41.0383	34.8115	0.357747	0.862	0.308378	-1.43568	Down	MGI:1915984				>node 2 information	Ppp4r4	ENSMUSG00000021209	2.1526	5.49931	3.82595	0.874738	0.369	0.322778	-2.55473	Down	MGI:1921771
>interaction	Gls	Gldc	10090.ENSMUSP00000110158	10090.ENSMUSP00000025778	0	0	0	0	0	0	0.8	0.082	0.808	>node 1 information	Gls	ENSMUSG00000026103	29.0713	46.0093	37.5403	0.451195	0.881	0.397503	-1.58264	Down	MGI:95752				>node 2 information	Gldc	ENSMUSG00000024827	25.6281	15.4695	20.5488	0.494365	0.712	0.351988	1.65669	Up	MGI:1341155
>interaction	Cdk14	Pkmyt1	10090.ENSMUSP00000030763	10090.ENSMUSP00000024701	0	0	0	0.63	0.102	0.674	0.246	0.565	0.808	>node 1 information	Cdk14	ENSMUSG00000028926	13.3817	8.02872	10.7052	0.500035	0.541	0.270519	1.66673	Up	MGI:894318				>node 2 information	Pkmyt1	ENSMUSG00000023908	12.409	7.34801	9.87851	0.512323	0.523	0.267945	1.68876	Up	MGI:2137630
>interaction	Itga9	Col6a1	10090.ENSMUSP00000044227	10090.ENSMUSP00000001147	0	0	0	0	0.046	0.062	0.8	0.058	0.808	>node 1 information	Itga9	ENSMUSG00000039115	5.44719	2.40753	3.92736	0.77397	0.372	0.287917	2.26256	Up	MGI:104756				>node 2 information	Col6a1	ENSMUSG00000001119	9.71911	2.2577	5.98841	1.24598	0.428	0.533278	4.30487	Up	MGI:88459
>interaction	Mgll	Acsl6	10090.ENSMUSP00000127374	10090.ENSMUSP00000104532	0	0	0	0	0.042	0	0.8	0.075	0.807	>node 1 information	Mgll	ENSMUSG00000033174	32.1687	16.2205	24.1946	0.659164	0.76	0.500964	1.98321	Up	MGI:1346042	cell differentiation			>node 2 information	Acsl6	ENSMUSG00000020333	1.88931	6.87436	4.38183	1.13766	0.386	0.439138	-3.63856	Down	MGI:894291	cell proliferation;cell differentiation
>interaction	Smad6	Acvrl1	10090.ENSMUSP00000036285	10090.ENSMUSP00000000542	0	0	0	0	0.086	0.302	0.379	0.57	0.807	>node 1 information	Smad6	ENSMUSG00000036867	14.8957	6.44865	10.6722	0.791502	0.54	0.427411	2.30989	Up	MGI:1336883	cell proliferation;cell differentiation			>node 2 information	Acvrl1	ENSMUSG00000000530	10.6273	4.67887	7.65308	0.777259	0.471	0.366089	2.27134	Up	MGI:1338946	cell proliferation;cell differentiation
>interaction	Ube2c	Bub1	10090.ENSMUSP00000085581	10090.ENSMUSP00000028858	0	0	0	0	0.726	0	0	0.323	0.807	>node 1 information	Ube2c	ENSMUSG00000001403	47.8028	33.7011	40.752	0.346037	0.9	0.311434	1.41843	Up	MGI:1915862				>node 2 information	Bub1	ENSMUSG00000027379	25.1238	36.3607	30.7422	0.36552	0.828	0.30265	-1.44726	Down	MGI:1100510		abnormal male fertility;abnormal spermatogenesis
>interaction	Tcf7	Tead2	10090.ENSMUSP00000084055	10090.ENSMUSP00000033060	0	0	0	0	0.055	0	0.8	0.063	0.807	>node 1 information	Tcf7	ENSMUSG00000000782	75.784	56.1956	65.9898	0.29684	0.973	0.288825	1.34858	Up	MGI:98507	cell proliferation;cell differentiation			>node 2 information	Tead2	ENSMUSG00000030796	28.0797	19.4863	23.783	0.361325	0.754	0.272439	1.441	Up	MGI:104904	cell differentiation
>interaction	Prm2	Tnp1	10090.ENSMUSP00000047925	10090.ENSMUSP00000027374	0	0	0	0	0.536	0	0	0.6	0.806	>node 1 information	Prm2	ENSMUSG00000038015	0	2.30164	1.15082	2	0.252	0.504	0	Down	MGI:97766	cell differentiation			>node 2 information	Tnp1	ENSMUSG00000026182	1.03892	8.63889	4.8389	1.5706	0.398	0.625098	-8.31526	Down	MGI:98784	cell differentiation	abnormal male fertility
>interaction	Ppp1cb	Cacnb3	10090.ENSMUSP00000015100	10090.ENSMUSP00000003442	0	0	0	0	0.051	0	0.8	0.06	0.806	>node 1 information	Ppp1cb	ENSMUSG00000014956	33.4212	51.1162	42.2687	0.418631	0.907	0.379699	-1.52945	Down	MGI:104871				>node 2 information	Cacnb3	ENSMUSG00000003352	25.5705	17.2348	21.4027	0.38947	0.724	0.281977	1.48366	Up	MGI:103307
>interaction	Birc2	Ctso	10090.ENSMUSP00000091422	10090.ENSMUSP00000029649	0	0	0	0	0.065	0	0.8	0	0.805	>node 1 information	Birc2	ENSMUSG00000057367	26.647	38.5157	32.5814	0.364279	0.844	0.307451	-1.4454	Down	MGI:1197009				>node 2 information	Ctso	ENSMUSG00000028015	8.33895	13.9548	11.1469	0.503805	0.551	0.277596	-1.67345	Down	MGI:2139628
>interaction	Rad9b	Atr	10090.ENSMUSP00000036177	10090.ENSMUSP00000034980	0	0	0	0	0.068	0.315	0.409	0.545	0.805	>node 1 information	Rad9b	ENSMUSG00000038569	18.5285	27.3698	22.9491	0.385256	0.743	0.286245	-1.47717	Down	MGI:2385231				>node 2 information	Atr	ENSMUSG00000032409	23.1463	41.1559	32.1511	0.560155	0.84	0.47053	-1.77808	Down	MGI:108028
>interaction	Nsmce4a	Magea3	10090.ENSMUSP00000125300	10090.ENSMUSP00000078793	0	0	0	0	0.09	0.566	0	0.544	0.804	>node 1 information	Nsmce4a	ENSMUSG00000040331	31.8639	43.3607	37.6123	0.305666	0.881	0.269292	-1.36081	Down	MGI:1915122				>node 2 information	Magea3	ENSMUSG00000094196	1.00327	12.6113	6.80729	1.70524	0.45	0.767356	-12.5702	Down	MGI:1333832
>interaction	Rad21l	Smc5	10090.ENSMUSP00000094174	10090.ENSMUSP00000084837	0	0	0	0	0.403	0.425	0	0.474	0.804	>node 1 information	Rad21l	ENSMUSG00000074704	3.57825	10.297	6.93762	0.968451	0.454	0.439677	-2.87766	Down	MGI:3652039		abnormal male fertility		>node 2 information	Smc5	ENSMUSG00000024943	16.0463	24.2651	20.1557	0.407766	0.707	0.28829	-1.51219	Down	MGI:2385088
>interaction	Jun	Col1a2	10090.ENSMUSP00000054270	10090.ENSMUSP00000031668	0	0	0	0	0	0	0.528	0.602	0.804	>node 1 information	Jun	ENSMUSG00000052684	51.1912	37.6828	44.437	0.30399	0.917	0.278759	1.35848	Up	MGI:96646	cell proliferation;cell differentiation			>node 2 information	Col1a2	ENSMUSG00000029661	7.73864	3.26641	5.50253	0.81276	0.416	0.338108	2.36916	Up	MGI:88468
>interaction	Nsmce4a	Magea5	10090.ENSMUSP00000125300	10090.ENSMUSP00000065852	0	0	0	0	0.09	0.566	0	0.544	0.804	>node 1 information	Nsmce4a	ENSMUSG00000040331	31.8639	43.3607	37.6123	0.305666	0.881	0.269292	-1.36081	Down	MGI:1915122				>node 2 information	Magea5	ENSMUSG00000079349	13.6526	5.05598	9.35429	0.919003	0.511	0.469611	2.70029	Up	MGI:1333838
>interaction	Nsmce4a	Magea4	10090.ENSMUSP00000125300	10090.ENSMUSP00000046715	0	0	0	0	0.09	0.566	0	0.544	0.804	>node 1 information	Nsmce4a	ENSMUSG00000040331	31.8639	43.3607	37.6123	0.305666	0.881	0.269292	-1.36081	Down	MGI:1915122				>node 2 information	Magea4	ENSMUSG00000033343	1.85326	4.50466	3.17896	0.834046	0.348	0.290248	-2.43067	Down	MGI:1333839
>interaction	Cpeb4	Cdk1	10090.ENSMUSP00000020543	10090.ENSMUSP00000020099	0	0	0	0	0	0	0.8	0.059	0.803	>node 1 information	Cpeb4	ENSMUSG00000020300	6.31684	11.3051	8.81097	0.566142	0.496	0.280806	-1.78968	Down	MGI:1914829				>node 2 information	Cdk1	ENSMUSG00000019942	57.6102	40.4389	49.0245	0.350259	0.936	0.327843	1.42462	Up	MGI:88351	cell proliferation;cell differentiation
>interaction	Cacnb1	Ppp1cb	10090.ENSMUSP00000017552	10090.ENSMUSP00000015100	0	0	0	0	0.051	0	0.8	0.046	0.803	>node 1 information	Cacnb1	ENSMUSG00000020882	1.73029	9.5573	5.64379	1.38683	0.42	0.582471	-5.52352	Down	MGI:102522				>node 2 information	Ppp1cb	ENSMUSG00000014956	33.4212	51.1162	42.2687	0.418631	0.907	0.379699	-1.52945	Down	MGI:104871
>interaction	Ash1l	Wsb1	10090.ENSMUSP00000088451	10090.ENSMUSP00000017821	0	0	0	0	0.093	0.763	0	0.158	0.803	>node 1 information	Ash1l	ENSMUSG00000028053	20.181	29.1935	24.6872	0.365067	0.766	0.279641	-1.44658	Down	MGI:2183158		abnormal male fertility		>node 2 information	Wsb1	ENSMUSG00000017677	35.5432	50.3479	42.9455	0.344732	0.911	0.314051	-1.41653	Down	MGI:1926139
>interaction	Cpeb2	Cdk1	10090.ENSMUSP00000125857	10090.ENSMUSP00000020099	0	0	0	0	0	0	0.8	0.056	0.803	>node 1 information	Cpeb2	ENSMUSG00000039782	4.95521	10.3213	7.63826	0.702528	0.471	0.330891	-2.08292	Down	MGI:2442640				>node 2 information	Cdk1	ENSMUSG00000019942	57.6102	40.4389	49.0245	0.350259	0.936	0.327843	1.42462	Up	MGI:88351	cell proliferation;cell differentiation
>interaction	Ppp3r1	Anapc10	10090.ENSMUSP00000099944	10090.ENSMUSP00000048244	0	0	0	0	0.047	0	0.8	0.051	0.803	>node 1 information	Ppp3r1	ENSMUSG00000033953	33.0538	45.3989	39.2263	0.314714	0.891	0.280411	-1.37349	Down	MGI:107172	cell differentiation			>node 2 information	Anapc10	ENSMUSG00000036977	9.24782	16.1556	12.7017	0.543846	0.583	0.317062	-1.74696	Down	MGI:1916249
>interaction	Ppp1cc	Cacnb1	10090.ENSMUSP00000099587	10090.ENSMUSP00000017552	0	0	0	0	0.051	0	0.8	0	0.802	>node 1 information	Ppp1cc	ENSMUSG00000004455	31.299	43.4603	37.3796	0.325345	0.88	0.286304	-1.38855	Down	MGI:104872	cell differentiation	abnormal male fertility		>node 2 information	Cacnb1	ENSMUSG00000020882	1.73029	9.5573	5.64379	1.38683	0.42	0.582471	-5.52352	Down	MGI:102522
>interaction	Ppp1cc	Creb3l1	10090.ENSMUSP00000099587	10090.ENSMUSP00000028663	0	0	0	0	0.051	0	0.8	0	0.802	>node 1 information	Ppp1cc	ENSMUSG00000004455	31.299	43.4603	37.3796	0.325345	0.88	0.286304	-1.38855	Down	MGI:104872	cell differentiation	abnormal male fertility		>node 2 information	Creb3l1	ENSMUSG00000027230	7.9394	3.29871	5.61906	0.825884	0.419	0.346046	2.40682	Up	MGI:1347062	cell differentiation
>interaction	Smarca1	Top2b	10090.ENSMUSP00000076769	10090.ENSMUSP00000017629	0	0	0	0	0.303	0.418	0.398	0.287	0.802	>node 1 information	Smarca1	ENSMUSG00000031099	13.2549	22.5757	17.9153	0.52027	0.672	0.349622	-1.7032	Down	MGI:1935127	cell proliferation;cell differentiation			>node 2 information	Top2b	ENSMUSG00000017485	11.6204	23.5306	17.5755	0.677659	0.667	0.451999	-2.02494	Down	MGI:98791	cell differentiation
>interaction	Ppp1cc	Cacnb3	10090.ENSMUSP00000099587	10090.ENSMUSP00000003442	0	0	0	0	0.051	0	0.8	0	0.802	>node 1 information	Ppp1cc	ENSMUSG00000004455	31.299	43.4603	37.3796	0.325345	0.88	0.286304	-1.38855	Down	MGI:104872	cell differentiation	abnormal male fertility		>node 2 information	Cacnb3	ENSMUSG00000003352	25.5705	17.2348	21.4027	0.38947	0.724	0.281977	1.48366	Up	MGI:103307
>interaction	Aldh1a2	Aldh1a7	10090.ENSMUSP00000034723	10090.ENSMUSP00000025656	0	0	0.527	0.981	0	0	0.8	0.154	0.802	>node 1 information	Aldh1a2	ENSMUSG00000013584	27.7565	40.2735	34.015	0.367985	0.855	0.314627	-1.45096	Down	MGI:107928	cell proliferation;cell differentiation			>node 2 information	Aldh1a7	ENSMUSG00000024747	5.35988	10.4797	7.91979	0.646459	0.476	0.307715	-1.95521	Down	MGI:1347050
>interaction	Wdhd1	Tipin	10090.ENSMUSP00000107421	10090.ENSMUSP00000034964	0	0	0	0	0.589	0.1	0	0.508	0.802	>node 1 information	Wdhd1	ENSMUSG00000037572	35.0398	47.4761	41.258	0.301428	0.902	0.271888	-1.35492	Down	MGI:2443514				>node 2 information	Tipin	ENSMUSG00000032397	48.695	79.1464	63.9207	0.476393	0.969	0.461625	-1.62535	Down	MGI:1921571	cell proliferation
>interaction	Creb3l1	Ppp1cb	10090.ENSMUSP00000028663	10090.ENSMUSP00000015100	0	0	0	0	0.051	0	0.8	0	0.802	>node 1 information	Creb3l1	ENSMUSG00000027230	7.9394	3.29871	5.61906	0.825884	0.419	0.346046	2.40682	Up	MGI:1347062	cell differentiation			>node 2 information	Ppp1cb	ENSMUSG00000014956	33.4212	51.1162	42.2687	0.418631	0.907	0.379699	-1.52945	Down	MGI:104871
>interaction	Rere	Sall1	10090.ENSMUSP00000101307	10090.ENSMUSP00000034090	0	0	0	0	0	0.305	0.72	0.06	0.801	>node 1 information	Rere	ENSMUSG00000039852	58.23	42.8225	50.5262	0.304941	0.942	0.287254	1.3598	Up	MGI:2683486	cell proliferation;cell differentiation			>node 2 information	Sall1	ENSMUSG00000031665	17.6123	9.3015	13.4569	0.617587	0.597	0.368699	1.89349	Up	MGI:1889585	cell proliferation;cell differentiation
>interaction	Oxtr	Cacnb1	10090.ENSMUSP00000051132	10090.ENSMUSP00000017552	0	0	0	0	0	0	0.8	0.047	0.801	>node 1 information	Oxtr	ENSMUSG00000049112	2.47201	0.865303	1.66866	0.962875	0.284	0.273456	2.85681	Up	MGI:109147				>node 2 information	Cacnb1	ENSMUSG00000020882	1.73029	9.5573	5.64379	1.38683	0.42	0.582471	-5.52352	Down	MGI:102522
>interaction	Oxtr	Cacnb3	10090.ENSMUSP00000051132	10090.ENSMUSP00000003442	0	0	0	0	0	0	0.8	0.047	0.801	>node 1 information	Oxtr	ENSMUSG00000049112	2.47201	0.865303	1.66866	0.962875	0.284	0.273456	2.85681	Up	MGI:109147				>node 2 information	Cacnb3	ENSMUSG00000003352	25.5705	17.2348	21.4027	0.38947	0.724	0.281977	1.48366	Up	MGI:103307
>interaction	Cdo1	Ppcs	10090.ENSMUSP00000046517	10090.ENSMUSP00000030385	0	0	0	0	0.05	0	0.8	0	0.801	>node 1 information	Cdo1	ENSMUSG00000033022	14.323	23.002	18.6625	0.46505	0.683	0.317629	-1.60595	Down	MGI:105925		abnormal male fertility		>node 2 information	Ppcs	ENSMUSG00000028636	8.70406	16.7217	12.7129	0.630671	0.583	0.367681	-1.92114	Down	MGI:1915237
>interaction	Mboat2	Gpd1	10090.ENSMUSP00000106567	10090.ENSMUSP00000023760	0	0	0	0	0.05	0	0.8	0	0.801	>node 1 information	Mboat2	ENSMUSG00000020646	14.2221	23.3226	18.7723	0.484782	0.684	0.331591	-1.63988	Down	MGI:1914466				>node 2 information	Gpd1	ENSMUSG00000023019	10.5348	17.269	13.9019	0.484409	0.606	0.293552	-1.63923	Down	MGI:95679
>interaction	Uba6	Ube2e1	10090.ENSMUSP00000035328	10090.ENSMUSP00000022296	0	0	0	0	0.051	0.58	0.135	0.492	0.801	>node 1 information	Uba6	ENSMUSG00000035898	16.5199	28.092	22.3059	0.51879	0.736	0.381829	-1.70049	Down	MGI:1913894				>node 2 information	Ube2e1	ENSMUSG00000021774	30.807	46.123	38.465	0.39818	0.887	0.353186	-1.49716	Down	MGI:107411
>interaction	Acta2	Ruvbl2	10090.ENSMUSP00000048218	10090.ENSMUSP00000033087	0	0	0	0	0.09	0.721	0.206	0.128	0.8	>node 1 information	Acta2	ENSMUSG00000035783	12.036	6.76842	9.40221	0.560249	0.512	0.286848	1.77826	Up	MGI:87909				>node 2 information	Ruvbl2	ENSMUSG00000003868	43.6982	32.091	37.8946	0.306302	0.882	0.270159	1.3617	Up	MGI:1342299
>interaction	Cacng5	Ppp1cb	10090.ENSMUSP00000047888	10090.ENSMUSP00000015100	0	0	0	0	0	0	0.8	0	0.8	>node 1 information	Cacng5	ENSMUSG00000040373	2.08558	9.50261	5.7941	1.2801	0.423	0.541483	-4.55634	Down	MGI:2157946				>node 2 information	Ppp1cb	ENSMUSG00000014956	33.4212	51.1162	42.2687	0.418631	0.907	0.379699	-1.52945	Down	MGI:104871
>interaction	Oxtr	Cacng5	10090.ENSMUSP00000051132	10090.ENSMUSP00000047888	0	0	0	0	0	0	0.8	0	0.8	>node 1 information	Oxtr	ENSMUSG00000049112	2.47201	0.865303	1.66866	0.962875	0.284	0.273456	2.85681	Up	MGI:109147				>node 2 information	Cacng5	ENSMUSG00000040373	2.08558	9.50261	5.7941	1.2801	0.423	0.541483	-4.55634	Down	MGI:2157946
>interaction	Ppp1cc	Cacng5	10090.ENSMUSP00000099587	10090.ENSMUSP00000047888	0	0	0	0	0	0	0.8	0	0.8	>node 1 information	Ppp1cc	ENSMUSG00000004455	31.299	43.4603	37.3796	0.325345	0.88	0.286304	-1.38855	Down	MGI:104872	cell differentiation	abnormal male fertility		>node 2 information	Cacng5	ENSMUSG00000040373	2.08558	9.50261	5.7941	1.2801	0.423	0.541483	-4.55634	Down	MGI:2157946
>interaction	Itga9	Vasp	10090.ENSMUSP00000044227	10090.ENSMUSP00000032561	0	0	0	0	0	0	0.8	0	0.8	>node 1 information	Itga9	ENSMUSG00000039115	5.44719	2.40753	3.92736	0.77397	0.372	0.287917	2.26256	Up	MGI:104756				>node 2 information	Vasp	ENSMUSG00000030403	28.6723	19.4157	24.044	0.384986	0.758	0.291819	1.47676	Up	MGI:109268	cell differentiation
>interaction	Thy1	Arhgap5	10090.ENSMUSP00000110489	10090.ENSMUSP00000106353	0	0	0	0	0	0	0.8	0	0.8	>node 1 information	Thy1	ENSMUSG00000032011	2.10479	0.664107	1.38445	1.04062	0.267	0.277845	3.16935	Up	MGI:98747	cell differentiation			>node 2 information	Arhgap5	ENSMUSG00000035133	17.1675	29.7961	23.4818	0.537804	0.75	0.403353	-1.73561	Down	MGI:1332637	cell proliferation
>interaction	Hnrnph1	Ddx5	10090.ENSMUSP00000070503	10090.ENSMUSP00000021062	0	0	0	0	0.61	0.278	0	0.348	0.8	>node 1 information	Hnrnph1	ENSMUSG00000007850	59.2193	84.1137	71.6665	0.347365	0.98	0.340417	-1.42038	Down	MGI:1891925				>node 2 information	Ddx5	ENSMUSG00000020719	44.9438	61.3357	53.1397	0.308468	0.948	0.292427	-1.36472	Down	MGI:105037	cell differentiation
>interaction	Hist1h3c	Hdac2	10090.ENSMUSP00000089346	10090.ENSMUSP00000019911	0.318	0	0	0	0.052	0.402	0	0.544	0.8	>node 1 information	Hist1h3c	ENSMUSG00000069310	2.0088	0.542508	1.27565	1.14944	0.26	0.298855	3.7028	Up	MGI:2448320				>node 2 information	Hdac2	ENSMUSG00000019777	62.0497	84.1093	73.0795	0.301858	0.981	0.296122	-1.35552	Down	MGI:1097691	cell proliferation;cell differentiation
>interaction	Atr	Cdk14	10090.ENSMUSP00000034980	10090.ENSMUSP00000030763	0	0	0	0	0.067	0.522	0.3	0.433	0.799	>node 1 information	Atr	ENSMUSG00000032409	23.1463	41.1559	32.1511	0.560155	0.84	0.47053	-1.77808	Down	MGI:108028				>node 2 information	Cdk14	ENSMUSG00000028926	13.3817	8.02872	10.7052	0.500035	0.541	0.270519	1.66673	Up	MGI:894318
>interaction	Ppia	Ppp3r1	10090.ENSMUSP00000117987	10090.ENSMUSP00000099944	0	0	0	0	0.054	0.709	0	0.327	0.798	>node 1 information	Ppia	ENSMUSG00000071866	10.4791	21.8297	16.1544	0.702637	0.645	0.453201	-2.08318	Down	MGI:97749	cell differentiation			>node 2 information	Ppp3r1	ENSMUSG00000033953	33.0538	45.3989	39.2263	0.314714	0.891	0.280411	-1.37349	Down	MGI:107172	cell differentiation
>interaction	Rasa1	Yes1	10090.ENSMUSP00000105179	10090.ENSMUSP00000072154	0	0	0	0.618	0.115	0.545	0.528	0.088	0.797	>node 1 information	Rasa1	ENSMUSG00000021549	28.7617	40.4315	34.5966	0.337311	0.86	0.290087	-1.40574	Down	MGI:97860	cell proliferation			>node 2 information	Yes1	ENSMUSG00000014932	11.5126	19.1687	15.3407	0.499073	0.633	0.315913	-1.66502	Down	MGI:99147	cell proliferation;cell differentiation
>interaction	Ash1l	Top2a	10090.ENSMUSP00000088451	10090.ENSMUSP00000068896	0.046	0	0	0	0.243	0.426	0.382	0.33	0.797	>node 1 information	Ash1l	ENSMUSG00000028053	20.181	29.1935	24.6872	0.365067	0.766	0.279641	-1.44658	Down	MGI:2183158		abnormal male fertility		>node 2 information	Top2a	ENSMUSG00000020914	47.0462	64.8343	55.9402	0.317984	0.955	0.303675	-1.3781	Down	MGI:98790	cell differentiation
>interaction	Snai1	Mmp9	10090.ENSMUSP00000050581	10090.ENSMUSP00000017881	0	0	0	0	0.061	0	0	0.793	0.797	>node 1 information	Snai1	ENSMUSG00000042821	10.7679	5.23635	8.00212	0.69126	0.478	0.330422	2.05638	Up	MGI:98330	cell differentiation			>node 2 information	Mmp9	ENSMUSG00000017737	8.08981	4.25239	6.1711	0.621837	0.433	0.269256	1.90241	Up	MGI:97011	cell proliferation
>interaction	Kif22	Asf1b	10090.ENSMUSP00000032915	10090.ENSMUSP00000005607	0	0	0	0	0.797	0	0	0.045	0.797	>node 1 information	Kif22	ENSMUSG00000030677	20.6472	30.3917	25.5194	0.381846	0.775	0.295931	-1.47195	Down	MGI:109233				>node 2 information	Asf1b	ENSMUSG00000005470	72.1413	101.487	86.8141	0.338029	0.99	0.334649	-1.40678	Down	MGI:1914179
>interaction	Ldb2	Lhx1	10090.ENSMUSP00000067737	10090.ENSMUSP00000018842	0	0	0	0	0	0.594	0	0.52	0.797	>node 1 information	Ldb2	ENSMUSG00000039706	1.72852	0.382843	1.05568	1.2747	0.245	0.312301	4.51496	Up	MGI:894670				>node 2 information	Lhx1	ENSMUSG00000018698	6.21285	2.1719	4.19238	0.963881	0.381	0.367239	2.86056	Up	MGI:99783	cell proliferation;cell differentiation		Lhx1
>interaction	Jun	Cdk1	10090.ENSMUSP00000054270	10090.ENSMUSP00000020099	0	0	0	0	0.052	0.115	0.528	0.546	0.796	>node 1 information	Jun	ENSMUSG00000052684	51.1912	37.6828	44.437	0.30399	0.917	0.278759	1.35848	Up	MGI:96646	cell proliferation;cell differentiation			>node 2 information	Cdk1	ENSMUSG00000019942	57.6102	40.4389	49.0245	0.350259	0.936	0.327843	1.42462	Up	MGI:88351	cell proliferation;cell differentiation
>interaction	Idh2	Mdh1	10090.ENSMUSP00000103007	10090.ENSMUSP00000099938	0.318	0	0	0	0.307	0.28	0	0.467	0.795	>node 1 information	Idh2	ENSMUSG00000030541	23.7115	6.32501	15.0183	1.15769	0.628	0.72703	3.74885	Up	MGI:96414	cell proliferation;cell differentiation			>node 2 information	Mdh1	ENSMUSG00000020321	19.4513	34.5813	27.0163	0.560032	0.791	0.442986	-1.77784	Down	MGI:97051
>interaction	Skp1a	Ube2b	10090.ENSMUSP00000038744	10090.ENSMUSP00000020657	0	0	0	0	0.1	0.554	0.212	0.426	0.794	>node 1 information	Skp1a	ENSMUSG00000036309	50.0088	80.2426	65.1257	0.464238	0.972	0.451239	-1.60457	Down	MGI:103575				>node 2 information	Ube2b	ENSMUSG00000020390	23.5406	37.2204	30.3805	0.450282	0.823	0.370582	-1.58112	Down	MGI:102944	cell differentiation	abnormal male fertility;abnormal spermatogenesis
>interaction	Rab11a	Myh11	10090.ENSMUSP00000129163	10090.ENSMUSP00000087756	0	0	0	0	0.054	0.679	0.074	0.357	0.794	>node 1 information	Rab11a	ENSMUSG00000004771	33.5683	56.4305	44.9994	0.508056	0.92	0.467411	-1.68107	Down	MGI:1858202	cell differentiation			>node 2 information	Myh11	ENSMUSG00000018830	3.23215	0.928521	2.08034	1.10734	0.305	0.337737	3.48097	Up	MGI:102643	cell differentiation
>interaction	Bub1	Kif18b	10090.ENSMUSP00000028858	10090.ENSMUSP00000021311	0	0	0	0	0.701	0.291	0	0.107	0.794	>node 1 information	Bub1	ENSMUSG00000027379	25.1238	36.3607	30.7422	0.36552	0.828	0.30265	-1.44726	Down	MGI:1100510		abnormal male fertility;abnormal spermatogenesis		>node 2 information	Kif18b	ENSMUSG00000051378	34.2817	21.665	27.9733	0.451026	0.801	0.361272	1.58235	Up	MGI:2446979
>interaction	Rbbp4	Sirt1	10090.ENSMUSP00000099658	10090.ENSMUSP00000020257	0	0	0	0	0.077	0.047	0.72	0.261	0.793	>node 1 information	Rbbp4	ENSMUSG00000057236	103.011	139.545	121.278	0.301242	0.997	0.300338	-1.35466	Down	MGI:1194912				>node 2 information	Sirt1	ENSMUSG00000020063	19.5441	31.9323	25.7382	0.481316	0.777	0.373982	-1.63386	Down	MGI:2135607	cell proliferation;cell differentiation	abnormal male fertility;abnormal spermatogenesis
>interaction	Thy1	Nt5e	10090.ENSMUSP00000110489	10090.ENSMUSP00000034992	0	0	0	0	0	0	0	0.793	0.793	>node 1 information	Thy1	ENSMUSG00000032011	2.10479	0.664107	1.38445	1.04062	0.267	0.277845	3.16935	Up	MGI:98747	cell differentiation			>node 2 information	Nt5e	ENSMUSG00000032420	24.2773	34.4179	29.3476	0.345534	0.814	0.281265	-1.4177	Down	MGI:99782
>interaction	Thy1	Eng	10090.ENSMUSP00000110489	10090.ENSMUSP00000009705	0	0	0	0	0	0	0	0.793	0.793	>node 1 information	Thy1	ENSMUSG00000032011	2.10479	0.664107	1.38445	1.04062	0.267	0.277845	3.16935	Up	MGI:98747	cell differentiation			>node 2 information	Eng	ENSMUSG00000026814	11.9543	4.61291	8.2836	0.886255	0.484	0.428948	2.59149	Up	MGI:95392	cell proliferation;cell differentiation
>interaction	Acta2	Mnat1	10090.ENSMUSP00000048218	10090.ENSMUSP00000021523	0	0	0	0	0	0.793	0	0	0.793	>node 1 information	Acta2	ENSMUSG00000035783	12.036	6.76842	9.40221	0.560249	0.512	0.286848	1.77826	Up	MGI:87909				>node 2 information	Mnat1	ENSMUSG00000021103	15.9166	6.77796	11.3473	0.80536	0.556	0.44778	2.34829	Up	MGI:106207	cell proliferation	abnormal spermatogenesis
>interaction	Ash1l	Top2b	10090.ENSMUSP00000088451	10090.ENSMUSP00000017629	0.046	0	0	0	0.284	0.426	0.382	0.276	0.792	>node 1 information	Ash1l	ENSMUSG00000028053	20.181	29.1935	24.6872	0.365067	0.766	0.279641	-1.44658	Down	MGI:2183158		abnormal male fertility		>node 2 information	Top2b	ENSMUSG00000017485	11.6204	23.5306	17.5755	0.677659	0.667	0.451999	-2.02494	Down	MGI:98791	cell differentiation
>interaction	Smek1	Ppp1cb	10090.ENSMUSP00000129654	10090.ENSMUSP00000015100	0	0	0	0	0.123	0	0.72	0.222	0.792	>node 1 information	Smek1	ENSMUSG00000041846	28.5846	41.0383	34.8115	0.357747	0.862	0.308378	-1.43568	Down	MGI:1915984				>node 2 information	Ppp1cb	ENSMUSG00000014956	33.4212	51.1162	42.2687	0.418631	0.907	0.379699	-1.52945	Down	MGI:104871
>interaction	Smarca1	Top2a	10090.ENSMUSP00000076769	10090.ENSMUSP00000068896	0	0	0	0	0.268	0.418	0.398	0.287	0.792	>node 1 information	Smarca1	ENSMUSG00000031099	13.2549	22.5757	17.9153	0.52027	0.672	0.349622	-1.7032	Down	MGI:1935127	cell proliferation;cell differentiation			>node 2 information	Top2a	ENSMUSG00000020914	47.0462	64.8343	55.9402	0.317984	0.955	0.303675	-1.3781	Down	MGI:98790	cell differentiation
>interaction	Eif3m	Cops5	10090.ENSMUSP00000028592	10090.ENSMUSP00000027050	0	0	0	0	0.29	0.684	0	0.147	0.792	>node 1 information	Eif3m	ENSMUSG00000027170	4.91709	9.44787	7.18248	0.63081	0.46	0.290173	-1.92144	Down	MGI:1351744				>node 2 information	Cops5	ENSMUSG00000025917	26.1005	36.3417	31.2211	0.328022	0.832	0.272914	-1.39238	Down	MGI:1349415
>interaction	Gsk3a	Dvl2	10090.ENSMUSP00000071654	10090.ENSMUSP00000019362	0	0	0	0	0.067	0.115	0.528	0.528	0.791	>node 1 information	Gsk3a	ENSMUSG00000057177	25.3967	17.3198	21.3583	0.378163	0.724	0.27379	1.46634	Up	MGI:2152453	cell differentiation			>node 2 information	Dvl2	ENSMUSG00000020888	54.7571	39.3269	47.042	0.328009	0.93	0.305048	1.39236	Up	MGI:106613	cell proliferation
>interaction	Cfl2	Actr3	10090.ENSMUSP00000077262	10090.ENSMUSP00000027579	0	0	0	0	0.113	0.489	0.206	0.488	0.791	>node 1 information	Cfl2	ENSMUSG00000062929	20.2607	33.5658	26.9133	0.49437	0.79	0.390552	-1.65669	Down	MGI:101763	cell differentiation			>node 2 information	Actr3	ENSMUSG00000026341	31.0107	50.3094	40.66	0.474635	0.899	0.426697	-1.62232	Down	MGI:1921367	cell differentiation
>interaction	Anapc10	Cdk14	10090.ENSMUSP00000048244	10090.ENSMUSP00000030763	0	0	0	0	0.055	0.681	0	0.364	0.791	>node 1 information	Anapc10	ENSMUSG00000036977	9.24782	16.1556	12.7017	0.543846	0.583	0.317062	-1.74696	Down	MGI:1916249				>node 2 information	Cdk14	ENSMUSG00000028926	13.3817	8.02872	10.7052	0.500035	0.541	0.270519	1.66673	Up	MGI:894318
>interaction	Cfl2	Pfn2	10090.ENSMUSP00000077262	10090.ENSMUSP00000068890	0	0	0	0	0.281	0.293	0	0.622	0.791	>node 1 information	Cfl2	ENSMUSG00000062929	20.2607	33.5658	26.9133	0.49437	0.79	0.390552	-1.65669	Down	MGI:101763	cell differentiation			>node 2 information	Pfn2	ENSMUSG00000027805	25.5363	35.7026	30.6195	0.332021	0.827	0.274581	-1.39811	Down	MGI:97550
>interaction	Arpc3	Capza2	10090.ENSMUSP00000099584	10090.ENSMUSP00000015877	0	0	0	0	0.101	0.776	0	0.043	0.79	>node 1 information	Arpc3	ENSMUSG00000029465	57.8603	41.9539	49.9071	0.31872	0.939	0.299278	1.37914	Up	MGI:1928375				>node 2 information	Capza2	ENSMUSG00000015733	34.194	52.1351	43.1645	0.415644	0.912	0.379068	-1.52469	Down	MGI:106222
>interaction	Ube2c	Kif22	10090.ENSMUSP00000085581	10090.ENSMUSP00000032915	0	0	0	0	0.771	0	0	0.124	0.79	>node 1 information	Ube2c	ENSMUSG00000001403	47.8028	33.7011	40.752	0.346037	0.9	0.311434	1.41843	Up	MGI:1915862				>node 2 information	Kif22	ENSMUSG00000030677	20.6472	30.3917	25.5194	0.381846	0.775	0.295931	-1.47195	Down	MGI:109233
>interaction	Cbx5	Hdac2	10090.ENSMUSP00000104441	10090.ENSMUSP00000019911	0	0	0	0	0.13	0.047	0.72	0.205	0.79	>node 1 information	Cbx5	ENSMUSG00000009575	13.9573	22.5843	18.2708	0.472174	0.677	0.319662	-1.6181	Down	MGI:109372				>node 2 information	Hdac2	ENSMUSG00000019777	62.0497	84.1093	73.0795	0.301858	0.981	0.296122	-1.35552	Down	MGI:1097691	cell proliferation;cell differentiation
>interaction	Cdh3	Snai1	10090.ENSMUSP00000079613	10090.ENSMUSP00000050581	0	0	0	0	0	0.062	0.428	0.64	0.79	>node 1 information	Cdh3	ENSMUSG00000061048	12.737	6.16543	9.45121	0.695315	0.513	0.356697	2.06587	Up	MGI:88356	cell proliferation;cell differentiation			>node 2 information	Snai1	ENSMUSG00000042821	10.7679	5.23635	8.00212	0.69126	0.478	0.330422	2.05638	Up	MGI:98330	cell differentiation
>interaction	Ash1l	Smarca1	10090.ENSMUSP00000088451	10090.ENSMUSP00000076769	0	0	0	0	0.067	0.527	0.135	0.512	0.789	>node 1 information	Ash1l	ENSMUSG00000028053	20.181	29.1935	24.6872	0.365067	0.766	0.279641	-1.44658	Down	MGI:2183158		abnormal male fertility		>node 2 information	Smarca1	ENSMUSG00000031099	13.2549	22.5757	17.9153	0.52027	0.672	0.349622	-1.7032	Down	MGI:1935127	cell proliferation;cell differentiation
>interaction	Bub1	Esco2	10090.ENSMUSP00000028858	10090.ENSMUSP00000022613	0	0	0	0	0.766	0.1	0	0.079	0.789	>node 1 information	Bub1	ENSMUSG00000027379	25.1238	36.3607	30.7422	0.36552	0.828	0.30265	-1.44726	Down	MGI:1100510		abnormal male fertility;abnormal spermatogenesis		>node 2 information	Esco2	ENSMUSG00000022034	18.4805	29.4755	23.978	0.458545	0.756	0.34666	-1.59495	Down	MGI:1919238	cell differentiation
>interaction	Arpc3	Acta2	10090.ENSMUSP00000099584	10090.ENSMUSP00000048218	0	0	0	0	0.067	0.652	0.219	0.267	0.789	>node 1 information	Arpc3	ENSMUSG00000029465	57.8603	41.9539	49.9071	0.31872	0.939	0.299278	1.37914	Up	MGI:1928375				>node 2 information	Acta2	ENSMUSG00000035783	12.036	6.76842	9.40221	0.560249	0.512	0.286848	1.77826	Up	MGI:87909
>interaction	Hfm1	Nhp2l1	10090.ENSMUSP00000108310	10090.ENSMUSP00000091840	0	0	0	0	0.054	0.771	0	0.105	0.789	>node 1 information	Hfm1	ENSMUSG00000043410	2.66377	6.26674	4.46525	0.80689	0.389	0.31388	-2.35258	Down	MGI:3036246	cell differentiation	abnormal male fertility;abnormal spermatogenesis		>node 2 information	Nhp2l1	ENSMUSG00000063480	33.7821	45.8238	39.803	0.302533	0.895	0.270767	-1.35645	Down	MGI:893586
>interaction	Bgn	Col1a2	10090.ENSMUSP00000033741	10090.ENSMUSP00000031668	0	0	0	0	0.642	0.111	0	0.387	0.788	>node 1 information	Bgn	ENSMUSG00000031375	5.10903	2.21682	3.66292	0.78959	0.364	0.287411	2.30467	Up	MGI:88158				>node 2 information	Col1a2	ENSMUSG00000029661	7.73864	3.26641	5.50253	0.81276	0.416	0.338108	2.36916	Up	MGI:88468
>interaction	Mcm9	Atr	10090.ENSMUSP00000074978	10090.ENSMUSP00000034980	0	0	0	0	0.096	0.398	0.39	0.439	0.788	>node 1 information	Mcm9	ENSMUSG00000058298	11.5128	4.25857	7.88568	0.919924	0.476	0.437884	2.70344	Up	MGI:1918817				>node 2 information	Atr	ENSMUSG00000032409	23.1463	41.1559	32.1511	0.560155	0.84	0.47053	-1.77808	Down	MGI:108028
>interaction	Kif22	Bub1	10090.ENSMUSP00000032915	10090.ENSMUSP00000028858	0	0	0	0	0.698	0.291	0	0.09	0.788	>node 1 information	Kif22	ENSMUSG00000030677	20.6472	30.3917	25.5194	0.381846	0.775	0.295931	-1.47195	Down	MGI:109233				>node 2 information	Bub1	ENSMUSG00000027379	25.1238	36.3607	30.7422	0.36552	0.828	0.30265	-1.44726	Down	MGI:1100510		abnormal male fertility;abnormal spermatogenesis
>interaction	Tnp2	Prm1	10090.ENSMUSP00000053078	10090.ENSMUSP00000023144	0	0	0	0	0.559	0	0	0.54	0.788	>node 1 information	Tnp2	ENSMUSG00000043050	0.368839	4.99216	2.6805	1.7248	0.33	0.569183	-13.5348	Down	MGI:98785	cell differentiation	abnormal male fertility		>node 2 information	Prm1	ENSMUSG00000022501	0.0136858	2.95697	1.48533	1.98157	0.273	0.540969	-216.061	Down	MGI:97765	cell differentiation
>interaction	Tgfbr1	Acvrl1	10090.ENSMUSP00000007757	10090.ENSMUSP00000000542	0	0	0	0.932	0	0.545	0.528	0.717	0.787	>node 1 information	Tgfbr1	ENSMUSG00000007613	8.04767	14.1871	11.1174	0.552237	0.55	0.30373	-1.76288	Down	MGI:98728	cell proliferation;cell differentiation			>node 2 information	Acvrl1	ENSMUSG00000000530	10.6273	4.67887	7.65308	0.777259	0.471	0.366089	2.27134	Up	MGI:1338946	cell proliferation;cell differentiation
>interaction	Top2a	Kif18b	10090.ENSMUSP00000068896	10090.ENSMUSP00000021311	0	0	0	0	0.772	0	0	0.105	0.787	>node 1 information	Top2a	ENSMUSG00000020914	47.0462	64.8343	55.9402	0.317984	0.955	0.303675	-1.3781	Down	MGI:98790	cell differentiation			>node 2 information	Kif18b	ENSMUSG00000051378	34.2817	21.665	27.9733	0.451026	0.801	0.361272	1.58235	Up	MGI:2446979
>interaction	Kif18b	Asf1b	10090.ENSMUSP00000021311	10090.ENSMUSP00000005607	0	0	0	0	0.785	0	0	0.045	0.786	>node 1 information	Kif18b	ENSMUSG00000051378	34.2817	21.665	27.9733	0.451026	0.801	0.361272	1.58235	Up	MGI:2446979				>node 2 information	Asf1b	ENSMUSG00000005470	72.1413	101.487	86.8141	0.338029	0.99	0.334649	-1.40678	Down	MGI:1914179
>interaction	Hells	Top2b	10090.ENSMUSP00000025965	10090.ENSMUSP00000017629	0	0	0	0	0.229	0.418	0.398	0.303	0.786	>node 1 information	Hells	ENSMUSG00000025001	57.4751	83.9665	70.7208	0.374591	0.979	0.366725	-1.46092	Down	MGI:106209	cell differentiation			>node 2 information	Top2b	ENSMUSG00000017485	11.6204	23.5306	17.5755	0.677659	0.667	0.451999	-2.02494	Down	MGI:98791	cell differentiation
>interaction	Skp1a	Cacybp	10090.ENSMUSP00000038744	10090.ENSMUSP00000014370	0	0	0	0	0.288	0.59	0	0.32	0.785	>node 1 information	Skp1a	ENSMUSG00000036309	50.0088	80.2426	65.1257	0.464238	0.972	0.451239	-1.60457	Down	MGI:103575				>node 2 information	Cacybp	ENSMUSG00000014226	33.9314	47.0707	40.501	0.324419	0.898	0.291328	-1.38723	Down	MGI:1270839	cell differentiation
>interaction	Ubl4b	Rad23a	10090.ENSMUSP00000100577	10090.ENSMUSP00000003911	0	0	0	0	0.052	0.644	0	0.416	0.785	>node 1 information	Ubl4b	ENSMUSG00000055891	0.0951385	0.846267	0.470703	1.59576	0.177	0.282449	-8.89511	Down	MGI:1914841				>node 2 information	Rad23a	ENSMUSG00000003813	35.2558	23.8675	29.5617	0.385239	0.816	0.314355	1.47715	Up	MGI:105126
>interaction	Rbbp4	H3f3b	10090.ENSMUSP00000099658	10090.ENSMUSP00000016703	0	0	0	0	0.085	0.596	0	0.464	0.785	>node 1 information	Rbbp4	ENSMUSG00000057236	103.011	139.545	121.278	0.301242	0.997	0.300338	-1.35466	Down	MGI:1194912				>node 2 information	H3f3b	ENSMUSG00000016559	60.638	81.5386	71.0883	0.294009	0.979	0.287835	-1.34468	Down	MGI:1101768	cell proliferation;cell differentiation	abnormal male fertility
>interaction	Pou3f1	Egr2	10090.ENSMUSP00000137374	10090.ENSMUSP00000041053	0	0	0	0	0	0.055	0	0.782	0.785	>node 1 information	Pou3f1	ENSMUSG00000090125	14.4706	8.42046	11.4455	0.528603	0.558	0.29496	1.7185	Up	MGI:101896	cell differentiation		Pou3f1	>node 2 information	Egr2	ENSMUSG00000037868	16.8282	8.77512	12.8017	0.629065	0.585	0.368003	1.91772	Up	MGI:95296	cell differentiation
>interaction	Cmas	Naa15	10090.ENSMUSP00000032419	10090.ENSMUSP00000029303	0	0	0	0	0	0.784	0	0	0.784	>node 1 information	Cmas	ENSMUSG00000030282	30.8582	42.3796	36.6189	0.31463	0.875	0.275301	-1.37337	Down	MGI:1337124				>node 2 information	Naa15	ENSMUSG00000063273	21.5612	31.4926	26.5269	0.37439	0.786	0.29427	-1.46061	Down	MGI:1922088	cell differentiation
>interaction	Mcm8	Bub1	10090.ENSMUSP00000066842	10090.ENSMUSP00000028858	0	0	0	0	0.756	0.052	0	0.14	0.784	>node 1 information	Mcm8	ENSMUSG00000027353	15.6926	25.9249	20.8087	0.491731	0.716	0.352079	-1.65205	Down	MGI:1913884		abnormal male fertility		>node 2 information	Bub1	ENSMUSG00000027379	25.1238	36.3607	30.7422	0.36552	0.828	0.30265	-1.44726	Down	MGI:1100510		abnormal male fertility;abnormal spermatogenesis
>interaction	Jun	Gata1	10090.ENSMUSP00000054270	10090.ENSMUSP00000033502	0	0	0	0	0	0.113	0.254	0.698	0.783	>node 1 information	Jun	ENSMUSG00000052684	51.1912	37.6828	44.437	0.30399	0.917	0.278759	1.35848	Up	MGI:96646	cell proliferation;cell differentiation			>node 2 information	Gata1	ENSMUSG00000031162	20.1164	30.2942	25.2053	0.403796	0.772	0.311731	-1.50595	Down	MGI:95661	cell proliferation;cell differentiation
>interaction	Cyp11a1	Lhcgr	10090.ENSMUSP00000034874	10090.ENSMUSP00000024916	0	0	0	0	0	0	0	0.781	0.781	>node 1 information	Cyp11a1	ENSMUSG00000032323	32.2124	13.8869	23.0496	0.795045	0.745	0.592308	2.31962	Up	MGI:88582		abnormal spermatogenesis		>node 2 information	Lhcgr	ENSMUSG00000024107	3.84609	0.8625	2.3543	1.2673	0.317	0.401733	4.45923	Up	MGI:96783	cell differentiation	abnormal male fertility
>interaction	Tgm2	Ugt8a	10090.ENSMUSP00000099411	10090.ENSMUSP00000050852	0	0	0	0	0	0	0	0.781	0.781	>node 1 information	Tgm2	ENSMUSG00000037820	16.4817	10.0051	13.2434	0.489044	0.593	0.290003	1.64733	Up	MGI:98731	cell proliferation			>node 2 information	Ugt8a	ENSMUSG00000032854	4.66549	13.1942	8.92985	0.955079	0.5	0.47754	-2.82804	Down	MGI:109522	cell differentiation
>interaction	Atr	Tipin	10090.ENSMUSP00000034980	10090.ENSMUSP00000034964	0	0	0	0	0.184	0.115	0.528	0.428	0.779	>node 1 information	Atr	ENSMUSG00000032409	23.1463	41.1559	32.1511	0.560155	0.84	0.47053	-1.77808	Down	MGI:108028				>node 2 information	Tipin	ENSMUSG00000032397	48.695	79.1464	63.9207	0.476393	0.969	0.461625	-1.62535	Down	MGI:1921571	cell proliferation
>interaction	Actn1	Psma6	10090.ENSMUSP00000021554	10090.ENSMUSP00000021412	0	0	0	0	0	0.779	0	0.042	0.779	>node 1 information	Actn1	ENSMUSG00000015143	14.1553	7.81392	10.9846	0.577297	0.547	0.315781	1.81155	Up	MGI:2137706	cell differentiation			>node 2 information	Psma6	ENSMUSG00000021024	49.725	69.4944	59.6097	0.331647	0.963	0.319376	-1.39757	Down	MGI:1347006
>interaction	Acta2	Myh9	10090.ENSMUSP00000048218	10090.ENSMUSP00000016771	0	0	0	0	0.117	0.514	0	0.527	0.779	>node 1 information	Acta2	ENSMUSG00000035783	12.036	6.76842	9.40221	0.560249	0.512	0.286848	1.77826	Up	MGI:87909				>node 2 information	Myh9	ENSMUSG00000022443	52.4866	38.5127	45.4997	0.307121	0.922	0.283166	1.36284	Up	MGI:107717	cell differentiation
>interaction	Pcgf5	Suz12	10090.ENSMUSP00000058730	10090.ENSMUSP00000017692	0	0	0	0	0.102	0	0.72	0.19	0.778	>node 1 information	Pcgf5	ENSMUSG00000024805	13.552	20.8818	17.2169	0.425733	0.662	0.281835	-1.54086	Down	MGI:1923505				>node 2 information	Suz12	ENSMUSG00000017548	25.5889	40.6406	33.1148	0.454532	0.848	0.385443	-1.58821	Down	MGI:1261758	cell proliferation;cell differentiation
>interaction	Ireb2	Slc11a2	10090.ENSMUSP00000034843	10090.ENSMUSP00000023774	0.046	0	0	0	0.052	0	0	0.774	0.778	>node 1 information	Ireb2	ENSMUSG00000032293	37.5874	54.1261	45.8567	0.36066	0.924	0.33325	-1.44001	Down	MGI:1928268				>node 2 information	Slc11a2	ENSMUSG00000023030	30.148	46.0946	38.1213	0.418312	0.885	0.370206	-1.52894	Down	MGI:1345279	cell differentiation
>interaction	Cyld	Omp	10090.ENSMUSP00000096119	10090.ENSMUSP00000095882	0	0	0	0	0	0.535	0	0.54	0.777	>node 1 information	Cyld	ENSMUSG00000036712	7.1934	12.9117	10.0526	0.568841	0.528	0.300348	-1.79494	Down	MGI:1921506	cell differentiation			>node 2 information	Omp	ENSMUSG00000074006	3.66872	0.744954	2.20684	1.32487	0.311	0.412034	4.92476	Up	MGI:97436	cell differentiation
>interaction	Acta2	Srf	10090.ENSMUSP00000048218	10090.ENSMUSP00000015749	0	0	0	0	0	0.168	0.528	0.48	0.777	>node 1 information	Acta2	ENSMUSG00000035783	12.036	6.76842	9.40221	0.560249	0.512	0.286848	1.77826	Up	MGI:87909				>node 2 information	Srf	ENSMUSG00000015605	45.4261	27.0628	36.2445	0.50665	0.873	0.442305	1.67854	Up	MGI:106658	cell proliferation;cell differentiation
>interaction	Eng	Tgfbr1	10090.ENSMUSP00000009705	10090.ENSMUSP00000007757	0	0	0	0	0	0.531	0	0.543	0.777	>node 1 information	Eng	ENSMUSG00000026814	11.9543	4.61291	8.2836	0.886255	0.484	0.428948	2.59149	Up	MGI:95392	cell proliferation;cell differentiation			>node 2 information	Tgfbr1	ENSMUSG00000007613	8.04767	14.1871	11.1174	0.552237	0.55	0.30373	-1.76288	Down	MGI:98728	cell proliferation;cell differentiation
>interaction	Ppp3r1	Ppp1cc	10090.ENSMUSP00000099944	10090.ENSMUSP00000099587	0	0	0	0	0.086	0.042	0.72	0.194	0.775	>node 1 information	Ppp3r1	ENSMUSG00000033953	33.0538	45.3989	39.2263	0.314714	0.891	0.280411	-1.37349	Down	MGI:107172	cell differentiation			>node 2 information	Ppp1cc	ENSMUSG00000004455	31.299	43.4603	37.3796	0.325345	0.88	0.286304	-1.38855	Down	MGI:104872	cell differentiation	abnormal male fertility
>interaction	Aff4	Aff1	10090.ENSMUSP00000051479	10090.ENSMUSP00000031256	0	0	0	0.613	0.049	0.067	0.72	0.461	0.775	>node 1 information	Aff4	ENSMUSG00000049470	13.1563	20.1377	16.647	0.419379	0.653	0.273854	-1.53065	Down	MGI:2136171	cell differentiation	abnormal male fertility		>node 2 information	Aff1	ENSMUSG00000029313	15.2049	7.94368	11.5743	0.627358	0.56	0.35132	1.91409	Up	MGI:1100819		abnormal male fertility
>interaction	Gpt2	Gldc	10090.ENSMUSP00000034136	10090.ENSMUSP00000025778	0.07	0	0	0	0.093	0	0.605	0.403	0.774	>node 1 information	Gpt2	ENSMUSG00000031700	13.3975	20.856	17.1268	0.435488	0.66	0.287422	-1.55671	Down	MGI:1915391				>node 2 information	Gldc	ENSMUSG00000024827	25.6281	15.4695	20.5488	0.494365	0.712	0.351988	1.65669	Up	MGI:1341155
>interaction	Rel	Birc2	10090.ENSMUSP00000099928	10090.ENSMUSP00000091422	0	0	0	0	0.053	0.107	0.379	0.618	0.772	>node 1 information	Rel	ENSMUSG00000020275	4.44161	8.43629	6.43895	0.620393	0.439	0.272353	-1.89938	Down	MGI:97897				>node 2 information	Birc2	ENSMUSG00000057367	26.647	38.5157	32.5814	0.364279	0.844	0.307451	-1.4454	Down	MGI:1197009
>interaction	Ruvbl2	Nop58	10090.ENSMUSP00000033087	10090.ENSMUSP00000027174	0	0	0	0	0.235	0.518	0	0.432	0.772	>node 1 information	Ruvbl2	ENSMUSG00000003868	43.6982	32.091	37.8946	0.306302	0.882	0.270159	1.3617	Up	MGI:1342299				>node 2 information	Nop58	ENSMUSG00000026020	38.1776	55.3223	46.7499	0.366732	0.929	0.340694	-1.44908	Down	MGI:1933184
>interaction	Ubl4b	Rpl19	10090.ENSMUSP00000100577	10090.ENSMUSP00000017548	0	0	0	0	0.296	0.681	0	0.064	0.771	>node 1 information	Ubl4b	ENSMUSG00000055891	0.0951385	0.846267	0.470703	1.59576	0.177	0.282449	-8.89511	Down	MGI:1914841				>node 2 information	Rpl19	ENSMUSG00000017404	16.2771	4.48338	10.3802	1.13617	0.534	0.606715	3.63054	Up	MGI:98020
>interaction	Pdlim7	Hsp90b1	10090.ENSMUSP00000047173	10090.ENSMUSP00000020238	0	0	0	0	0.052	0.76	0	0.073	0.77	>node 1 information	Pdlim7	ENSMUSG00000021493	25.7708	16.1852	20.978	0.456936	0.719	0.328537	1.59224	Up	MGI:1914649	cell differentiation			>node 2 information	Hsp90b1	ENSMUSG00000020048	91.776	128.922	110.349	0.336623	0.996	0.335276	-1.40475	Down	MGI:98817
>interaction	Bgn	Col6a1	10090.ENSMUSP00000033741	10090.ENSMUSP00000001147	0	0	0	0	0.621	0.075	0	0.394	0.769	>node 1 information	Bgn	ENSMUSG00000031375	5.10903	2.21682	3.66292	0.78959	0.364	0.287411	2.30467	Up	MGI:88158				>node 2 information	Col6a1	ENSMUSG00000001119	9.71911	2.2577	5.98841	1.24598	0.428	0.533278	4.30487	Up	MGI:88459
>interaction	Nhp2l1	Gmps	10090.ENSMUSP00000091840	10090.ENSMUSP00000029405	0	0	0	0	0.758	0	0	0.08	0.768	>node 1 information	Nhp2l1	ENSMUSG00000063480	33.7821	45.8238	39.803	0.302533	0.895	0.270767	-1.35645	Down	MGI:893586				>node 2 information	Gmps	ENSMUSG00000027823	30.2407	41.7003	35.9705	0.318583	0.871	0.277486	-1.37895	Down	MGI:2448526
>interaction	Acta2	Gsn	10090.ENSMUSP00000048218	10090.ENSMUSP00000028239	0	0	0	0	0.11	0.416	0.397	0.345	0.767	>node 1 information	Acta2	ENSMUSG00000035783	12.036	6.76842	9.40221	0.560249	0.512	0.286848	1.77826	Up	MGI:87909				>node 2 information	Gsn	ENSMUSG00000026879	13.0025	7.57822	10.2904	0.527122	0.533	0.280956	1.71577	Up	MGI:95851
>interaction	Rbbp4	Hist1h3c	10090.ENSMUSP00000099658	10090.ENSMUSP00000089346	0	0	0	0	0.052	0.596	0	0.437	0.766	>node 1 information	Rbbp4	ENSMUSG00000057236	103.011	139.545	121.278	0.301242	0.997	0.300338	-1.35466	Down	MGI:1194912				>node 2 information	Hist1h3c	ENSMUSG00000069310	2.0088	0.542508	1.27565	1.14944	0.26	0.298855	3.7028	Up	MGI:2448320
>interaction	Esf1	Pwp1	10090.ENSMUSP00000036523	10090.ENSMUSP00000001836	0	0	0	0	0.764	0	0	0	0.765	>node 1 information	Esf1	ENSMUSG00000045624	21.234	33.9415	27.5877	0.460621	0.797	0.367115	-1.59845	Down	MGI:1913830				>node 2 information	Pwp1	ENSMUSG00000001785	34.152	47.5857	40.8689	0.328703	0.901	0.296161	-1.39335	Down	MGI:1914735	cell differentiation
>interaction	Atr	Dmc1	10090.ENSMUSP00000034980	10090.ENSMUSP00000023065	0	0	0	0	0.052	0.5	0	0.545	0.765	>node 1 information	Atr	ENSMUSG00000032409	23.1463	41.1559	32.1511	0.560155	0.84	0.47053	-1.77808	Down	MGI:108028				>node 2 information	Dmc1	ENSMUSG00000022429	9.03307	19.713	14.373	0.743053	0.615	0.456978	-2.18231	Down	MGI:105393	cell differentiation	abnormal male fertility;abnormal spermatogenesis
>interaction	Rbbp4	Ash1l	10090.ENSMUSP00000099658	10090.ENSMUSP00000088451	0	0	0	0	0.069	0.55	0.19	0.39	0.765	>node 1 information	Rbbp4	ENSMUSG00000057236	103.011	139.545	121.278	0.301242	0.997	0.300338	-1.35466	Down	MGI:1194912				>node 2 information	Ash1l	ENSMUSG00000028053	20.181	29.1935	24.6872	0.365067	0.766	0.279641	-1.44658	Down	MGI:2183158		abnormal male fertility
>interaction	Ccne2	Cdt1	10090.ENSMUSP00000103960	10090.ENSMUSP00000006760	0	0	0	0	0.298	0.101	0.428	0.423	0.764	>node 1 information	Ccne2	ENSMUSG00000028212	9.17713	18.8589	14.018	0.690666	0.609	0.420616	-2.05499	Down	MGI:1329034		abnormal male fertility;abnormal spermatogenesis		>node 2 information	Cdt1	ENSMUSG00000006585	30.4764	21.5604	26.0184	0.342681	0.781	0.267634	1.41354	Up	MGI:1914427
>interaction	Ythdc2	Ddx50	10090.ENSMUSP00000048340	10090.ENSMUSP00000020270	0	0	0	0	0.31	0.212	0	0.602	0.764	>node 1 information	Ythdc2	ENSMUSG00000034653	6.29331	12.2139	9.25361	0.639814	0.508	0.325026	-1.94078	Down	MGI:2448561		abnormal male fertility		>node 2 information	Ddx50	ENSMUSG00000020076	22.7757	34.4382	28.607	0.407681	0.807	0.328998	-1.51206	Down	MGI:2182303
>interaction	Rbbp4	Orc5	10090.ENSMUSP00000099658	10090.ENSMUSP00000030872	0	0	0	0	0.187	0.681	0	0.159	0.763	>node 1 information	Rbbp4	ENSMUSG00000057236	103.011	139.545	121.278	0.301242	0.997	0.300338	-1.35466	Down	MGI:1194912				>node 2 information	Orc5	ENSMUSG00000029012	32.0778	44.1858	38.1318	0.31753	0.885	0.281014	-1.37746	Down	MGI:1347044
>interaction	Ash1l	Hist1h2aa	10090.ENSMUSP00000088451	10090.ENSMUSP00000072227	0	0	0	0	0.051	0.612	0	0.409	0.763	>node 1 information	Ash1l	ENSMUSG00000028053	20.181	29.1935	24.6872	0.365067	0.766	0.279641	-1.44658	Down	MGI:2183158		abnormal male fertility		>node 2 information	Hist1h2aa	ENSMUSG00000060081	0.22077	1.48228	0.851525	1.48147	0.226	0.334813	-6.71414	Down	MGI:2448285
>interaction	Col1a2	Fbn1	10090.ENSMUSP00000031668	10090.ENSMUSP00000028633	0	0	0	0	0.568	0.062	0.139	0.399	0.762	>node 1 information	Col1a2	ENSMUSG00000029661	7.73864	3.26641	5.50253	0.81276	0.416	0.338108	2.36916	Up	MGI:88468				>node 2 information	Fbn1	ENSMUSG00000027204	9.90878	5.4666	7.68769	0.57783	0.472	0.272736	1.8126	Up	MGI:95489	cell differentiation
>interaction	Hells	Cdk1	10090.ENSMUSP00000025965	10090.ENSMUSP00000020099	0	0	0	0	0.587	0.132	0.347	0.102	0.762	>node 1 information	Hells	ENSMUSG00000025001	57.4751	83.9665	70.7208	0.374591	0.979	0.366725	-1.46092	Down	MGI:106209	cell differentiation			>node 2 information	Cdk1	ENSMUSG00000019942	57.6102	40.4389	49.0245	0.350259	0.936	0.327843	1.42462	Up	MGI:88351	cell proliferation;cell differentiation
>interaction	Tex11	Tex15	10090.ENSMUSP00000009814	10090.ENSMUSP00000009772	0	0	0	0	0.112	0	0	0.742	0.761	>node 1 information	Tex11	ENSMUSG00000009670	26.6238	48.6657	37.6448	0.585524	0.881	0.515847	-1.8279	Down	MGI:1933237		abnormal male fertility;abnormal spermatogenesis		>node 2 information	Tex15	ENSMUSG00000009628	20.0133	39.2214	29.6173	0.648542	0.816	0.52921	-1.95977	Down	MGI:1934816	cell differentiation	abnormal male fertility;abnormal spermatogenesis
>interaction	Ash1l	Hist1h2af	10090.ENSMUSP00000088451	10090.ENSMUSP00000072989	0	0	0	0	0.051	0.612	0	0.403	0.76	>node 1 information	Ash1l	ENSMUSG00000028053	20.181	29.1935	24.6872	0.365067	0.766	0.279641	-1.44658	Down	MGI:2183158		abnormal male fertility		>node 2 information	Hist1h2af	ENSMUSG00000061991	3.23177	0.591375	1.91157	1.38127	0.297	0.410237	5.46484	Up	MGI:2448309
>interaction	Spata5	Rad23a	10090.ENSMUSP00000103747	10090.ENSMUSP00000003911	0	0	0	0	0.076	0.575	0.196	0.331	0.76	>node 1 information	Spata5	ENSMUSG00000027722	72.5288	100.171	86.3499	0.320118	0.99	0.316917	-1.38112	Down	MGI:1927170	cell differentiation			>node 2 information	Rad23a	ENSMUSG00000003813	35.2558	23.8675	29.5617	0.385239	0.816	0.314355	1.47715	Up	MGI:105126
>interaction	Dld	Mdh1	10090.ENSMUSP00000106481	10090.ENSMUSP00000099938	0.089	0	0	0	0.397	0.072	0.383	0.354	0.76	>node 1 information	Dld	ENSMUSG00000020664	25.2514	39.3389	32.2951	0.436211	0.841	0.366853	-1.55789	Down	MGI:107450	cell differentiation			>node 2 information	Mdh1	ENSMUSG00000020321	19.4513	34.5813	27.0163	0.560032	0.791	0.442986	-1.77784	Down	MGI:97051
>interaction	Smek2	Ppp1cb	10090.ENSMUSP00000020755	10090.ENSMUSP00000015100	0	0	0	0	0.176	0	0.72	0	0.759	>node 1 information	Smek2	ENSMUSG00000020463	33.8886	53.3522	43.6204	0.446204	0.914	0.407831	-1.57434	Down	MGI:2144474				>node 2 information	Ppp1cb	ENSMUSG00000014956	33.4212	51.1162	42.2687	0.418631	0.907	0.379699	-1.52945	Down	MGI:104871
>interaction	Ythdc2	Ddx56	10090.ENSMUSP00000048340	10090.ENSMUSP00000004507	0	0	0	0	0.477	0.069	0	0.543	0.758	>node 1 information	Ythdc2	ENSMUSG00000034653	6.29331	12.2139	9.25361	0.639814	0.508	0.325026	-1.94078	Down	MGI:2448561		abnormal male fertility		>node 2 information	Ddx56	ENSMUSG00000004393	48.5664	33.3119	40.9391	0.372614	0.901	0.335725	1.45793	Up	MGI:1277172	cell differentiation
>interaction	Mrps14	Nhp2l1	10090.ENSMUSP00000120075	10090.ENSMUSP00000091840	0.071	0	0	0	0.477	0.51	0	0.103	0.758	>node 1 information	Mrps14	ENSMUSG00000058267	9.76211	16.5502	13.1562	0.515963	0.591	0.304934	-1.69535	Down	MGI:1928141				>node 2 information	Nhp2l1	ENSMUSG00000063480	33.7821	45.8238	39.803	0.302533	0.895	0.270767	-1.35645	Down	MGI:893586
>interaction	Wdhd1	Mcm9	10090.ENSMUSP00000107421	10090.ENSMUSP00000074978	0	0	0	0	0.576	0.169	0	0.369	0.758	>node 1 information	Wdhd1	ENSMUSG00000037572	35.0398	47.4761	41.258	0.301428	0.902	0.271888	-1.35492	Down	MGI:2443514				>node 2 information	Mcm9	ENSMUSG00000058298	11.5128	4.25857	7.88568	0.919924	0.476	0.437884	2.70344	Up	MGI:1918817
>interaction	Parvb	Pdlim4	10090.ENSMUSP00000023072	10090.ENSMUSP00000018755	0	0	0	0	0.054	0.664	0.264	0.084	0.757	>node 1 information	Parvb	ENSMUSG00000022438	6.85027	12.6497	9.74999	0.594814	0.52	0.309303	-1.8466	Down	MGI:2153063				>node 2 information	Pdlim4	ENSMUSG00000020388	120.202	90.3757	105.289	0.283281	0.995	0.281864	1.33003	Up	MGI:1353470
>interaction	Pdlim7	Parvb	10090.ENSMUSP00000047173	10090.ENSMUSP00000023072	0	0	0	0	0.054	0.664	0.264	0.084	0.757	>node 1 information	Pdlim7	ENSMUSG00000021493	25.7708	16.1852	20.978	0.456936	0.719	0.328537	1.59224	Up	MGI:1914649	cell differentiation			>node 2 information	Parvb	ENSMUSG00000022438	6.85027	12.6497	9.74999	0.594814	0.52	0.309303	-1.8466	Down	MGI:2153063
>interaction	Pdlim3	Parvb	10090.ENSMUSP00000034053	10090.ENSMUSP00000023072	0	0	0	0	0.054	0.664	0.264	0.084	0.757	>node 1 information	Pdlim3	ENSMUSG00000031636	2.1586	0.529045	1.34382	1.21263	0.264	0.320133	4.08018	Up	MGI:1859274				>node 2 information	Parvb	ENSMUSG00000022438	6.85027	12.6497	9.74999	0.594814	0.52	0.309303	-1.8466	Down	MGI:2153063
>interaction	Xrcc1	Ercc1	10090.ENSMUSP00000070995	10090.ENSMUSP00000003645	0	0	0	0	0.077	0	0	0.747	0.757	>node 1 information	Xrcc1	ENSMUSG00000051768	47.1552	32.9409	40.0481	0.354931	0.896	0.318018	1.43151	Up	MGI:99137				>node 2 information	Ercc1	ENSMUSG00000003549	33.0386	22.7417	27.8901	0.369195	0.8	0.295356	1.45278	Up	MGI:95412	cell proliferation;cell differentiation	abnormal male fertility;abnormal spermatogenesis
>interaction	Hist1h3e	Rbbp4	10090.ENSMUSP00000100739	10090.ENSMUSP00000099658	0	0	0	0	0.052	0.513	0	0.516	0.757	>node 1 information	Hist1h3e	ENSMUSG00000069273	2.38594	0.341943	1.36394	1.4986	0.266	0.398626	6.9776	Up	MGI:2448326				>node 2 information	Rbbp4	ENSMUSG00000057236	103.011	139.545	121.278	0.301242	0.997	0.300338	-1.35466	Down	MGI:1194912
>interaction	Tnp2	Tnp1	10090.ENSMUSP00000053078	10090.ENSMUSP00000027374	0	0	0	0	0.405	0	0	0.608	0.756	>node 1 information	Tnp2	ENSMUSG00000043050	0.368839	4.99216	2.6805	1.7248	0.33	0.569183	-13.5348	Down	MGI:98785	cell differentiation	abnormal male fertility		>node 2 information	Tnp1	ENSMUSG00000026182	1.03892	8.63889	4.8389	1.5706	0.398	0.625098	-8.31526	Down	MGI:98784	cell differentiation	abnormal male fertility
>interaction	Top2a	Kif22	10090.ENSMUSP00000068896	10090.ENSMUSP00000032915	0	0	0	0	0.74	0	0	0.102	0.756	>node 1 information	Top2a	ENSMUSG00000020914	47.0462	64.8343	55.9402	0.317984	0.955	0.303675	-1.3781	Down	MGI:98790	cell differentiation			>node 2 information	Kif22	ENSMUSG00000030677	20.6472	30.3917	25.5194	0.381846	0.775	0.295931	-1.47195	Down	MGI:109233
>interaction	Jun	Cyr61	10090.ENSMUSP00000054270	10090.ENSMUSP00000029846	0	0	0	0	0.241	0	0.528	0.371	0.755	>node 1 information	Jun	ENSMUSG00000052684	51.1912	37.6828	44.437	0.30399	0.917	0.278759	1.35848	Up	MGI:96646	cell proliferation;cell differentiation			>node 2 information	Cyr61	ENSMUSG00000028195	39.7303	16.2534	27.9918	0.838705	0.801	0.671803	2.44443	Up	MGI:88613	cell proliferation;cell differentiation
>interaction	Ash1l	Hells	10090.ENSMUSP00000088451	10090.ENSMUSP00000025965	0	0	0	0	0.095	0.527	0.135	0.418	0.755	>node 1 information	Ash1l	ENSMUSG00000028053	20.181	29.1935	24.6872	0.365067	0.766	0.279641	-1.44658	Down	MGI:2183158		abnormal male fertility		>node 2 information	Hells	ENSMUSG00000025001	57.4751	83.9665	70.7208	0.374591	0.979	0.366725	-1.46092	Down	MGI:106209	cell differentiation
>interaction	Ssb	Srp19	10090.ENSMUSP00000088365	10090.ENSMUSP00000072386	0	0	0	0	0.224	0.68	0	0.086	0.753	>node 1 information	Ssb	ENSMUSG00000068882	48.4089	70.3089	59.3589	0.368942	0.963	0.355291	-1.4524	Down	MGI:98423				>node 2 information	Srp19	ENSMUSG00000014504	24.469	34.9596	29.7143	0.353049	0.818	0.288794	-1.42873	Down	MGI:1913634
>interaction	Rgl3	Ralb	10090.ENSMUSP00000035726	10090.ENSMUSP00000004565	0	0	0	0	0	0.499	0.231	0.41	0.753	>node 1 information	Rgl3	ENSMUSG00000040146	2.88813	1.06899	1.97856	0.919426	0.3	0.275828	2.70174	Up	MGI:1918996				>node 2 information	Ralb	ENSMUSG00000004451	28.0115	38.5071	33.2593	0.315569	0.85	0.268234	-1.37469	Down	MGI:1927244
>interaction	Rere	Ncor2	10090.ENSMUSP00000101307	10090.ENSMUSP00000083250	0	0	0	0	0.056	0	0.72	0.142	0.753	>node 1 information	Rere	ENSMUSG00000039852	58.23	42.8225	50.5262	0.304941	0.942	0.287254	1.3598	Up	MGI:2683486	cell proliferation;cell differentiation			>node 2 information	Ncor2	ENSMUSG00000029478	77.2072	56.488	66.8476	0.309947	0.974	0.301888	1.36679	Up	MGI:1337080	cell proliferation;cell differentiation
>interaction	Smc4	Orc5	10090.ENSMUSP00000047872	10090.ENSMUSP00000030872	0	0	0	0	0.128	0.723	0	0.058	0.752	>node 1 information	Smc4	ENSMUSG00000034349	22.8962	42.0519	32.474	0.589877	0.842	0.496677	-1.83663	Down	MGI:1917349				>node 2 information	Orc5	ENSMUSG00000029012	32.0778	44.1858	38.1318	0.31753	0.885	0.281014	-1.37746	Down	MGI:1347044
>interaction	Gmps	Dars	10090.ENSMUSP00000029405	10090.ENSMUSP00000027602	0.046	0	0	0	0.474	0	0	0.546	0.752	>node 1 information	Gmps	ENSMUSG00000027823	30.2407	41.7003	35.9705	0.318583	0.871	0.277486	-1.37895	Down	MGI:2448526				>node 2 information	Dars	ENSMUSG00000026356	29.9422	42.5408	36.2415	0.347629	0.873	0.30348	-1.42076	Down	MGI:2442544
>interaction	Ythdc2	Ddx5	10090.ENSMUSP00000048340	10090.ENSMUSP00000021062	0	0	0	0	0.271	0.212	0	0.602	0.751	>node 1 information	Ythdc2	ENSMUSG00000034653	6.29331	12.2139	9.25361	0.639814	0.508	0.325026	-1.94078	Down	MGI:2448561		abnormal male fertility		>node 2 information	Ddx5	ENSMUSG00000020719	44.9438	61.3357	53.1397	0.308468	0.948	0.292427	-1.36472	Down	MGI:105037	cell differentiation
>interaction	Tdgf1	Pou5f1	10090.ENSMUSP00000035075	10090.ENSMUSP00000025271	0	0	0	0	0.083	0.369	0	0.604	0.751	>node 1 information	Tdgf1	ENSMUSG00000032494	0.835785	0.117612	0.476699	1.50656	0.178	0.268167	7.10629	Up	MGI:98658	cell proliferation;cell differentiation			>node 2 information	Pou5f1	ENSMUSG00000024406	14.7539	6.6145	10.6842	0.761817	0.541	0.412143	2.23054	Up	MGI:101893	cell differentiation	abnormal male fertility
>interaction	Mtpn	Capza2	10090.ENSMUSP00000031866	10090.ENSMUSP00000015877	0	0	0	0	0.149	0	0.72	0	0.751	>node 1 information	Mtpn	ENSMUSG00000029840	35.5625	55.3655	45.464	0.435575	0.922	0.401601	-1.55685	Down	MGI:99445				>node 2 information	Capza2	ENSMUSG00000015733	34.194	52.1351	43.1645	0.415644	0.912	0.379068	-1.52469	Down	MGI:106222
>interaction	Ube2d3	Skp1a	10090.ENSMUSP00000101898	10090.ENSMUSP00000038744	0	0	0	0	0.241	0.48	0.212	0.293	0.75	>node 1 information	Ube2d3	ENSMUSG00000078578	18.9692	28.5682	23.7687	0.40385	0.754	0.304503	-1.50603	Down	MGI:1913355				>node 2 information	Skp1a	ENSMUSG00000036309	50.0088	80.2426	65.1257	0.464238	0.972	0.451239	-1.60457	Down	MGI:103575
>interaction	Lars2	Dars	10090.ENSMUSP00000036710	10090.ENSMUSP00000027602	0.318	0	0	0	0.165	0.49	0	0.238	0.749	>node 1 information	Lars2	ENSMUSG00000035202	19.8209	32.945	26.383	0.497446	0.784	0.389998	-1.66213	Down	MGI:2142973				>node 2 information	Dars	ENSMUSG00000026356	29.9422	42.5408	36.2415	0.347629	0.873	0.30348	-1.42076	Down	MGI:2442544
>interaction	Atp5k	Atp6v1g1	10090.ENSMUSP00000051222	10090.ENSMUSP00000048770	0	0	0	0	0.083	0	0.72	0.104	0.749	>node 1 information	Atp5k	ENSMUSG00000050856	4.35634	29.741	17.0487	1.48895	0.659	0.98122	-6.82706	Down	MGI:106636				>node 2 information	Atp6v1g1	ENSMUSG00000039105	26.6606	38.6864	32.6735	0.36806	0.844	0.310642	-1.45107	Down	MGI:1913540
>interaction	Arid4b	Hist1h3e	10090.ENSMUSP00000106163	10090.ENSMUSP00000100739	0	0	0	0	0.054	0.521	0	0.491	0.749	>node 1 information	Arid4b	ENSMUSG00000039219	9.457	20.0884	14.7727	0.719665	0.622	0.447632	-2.12418	Down	MGI:2137512	cell differentiation	abnormal male fertility;abnormal spermatogenesis		>node 2 information	Hist1h3e	ENSMUSG00000069273	2.38594	0.341943	1.36394	1.4986	0.266	0.398626	6.9776	Up	MGI:2448326
>interaction	Pex11a	Abcd3	10090.ENSMUSP00000032761	10090.ENSMUSP00000029770	0	0	0	0	0.438	0.091	0	0.546	0.748	>node 1 information	Pex11a	ENSMUSG00000030545	4.34238	9.51974	6.93106	0.74698	0.453	0.338382	-2.19229	Down	MGI:1338788	cell differentiation			>node 2 information	Abcd3	ENSMUSG00000028127	27.7663	42.0891	34.9277	0.41007	0.863	0.35389	-1.51583	Down	MGI:1349216
>interaction	Nasp	Asf1b	10090.ENSMUSP00000030456	10090.ENSMUSP00000005607	0	0	0	0	0.397	0.554	0	0.133	0.747	>node 1 information	Nasp	ENSMUSG00000028693	54.7631	73.2016	63.9823	0.288181	0.97	0.279536	-1.3367	Down	MGI:1355328	cell proliferation			>node 2 information	Asf1b	ENSMUSG00000005470	72.1413	101.487	86.8141	0.338029	0.99	0.334649	-1.40678	Down	MGI:1914179
>interaction	Smek1	Ppp1cc	10090.ENSMUSP00000129654	10090.ENSMUSP00000099587	0	0	0	0	0.124	0	0.72	0.053	0.747	>node 1 information	Smek1	ENSMUSG00000041846	28.5846	41.0383	34.8115	0.357747	0.862	0.308378	-1.43568	Down	MGI:1915984				>node 2 information	Ppp1cc	ENSMUSG00000004455	31.299	43.4603	37.3796	0.325345	0.88	0.286304	-1.38855	Down	MGI:104872	cell differentiation	abnormal male fertility
>interaction	Arpc3	Actr6	10090.ENSMUSP00000099584	10090.ENSMUSP00000020109	0	0	0	0	0	0.742	0	0.063	0.747	>node 1 information	Arpc3	ENSMUSG00000029465	57.8603	41.9539	49.9071	0.31872	0.939	0.299278	1.37914	Up	MGI:1928375				>node 2 information	Actr6	ENSMUSG00000019948	20.9756	32.5225	26.7491	0.431675	0.787	0.339728	-1.55049	Down	MGI:1914269
>interaction	Atp5f1	Atp6v1g1	10090.ENSMUSP00000113022	10090.ENSMUSP00000048770	0	0	0	0	0.128	0	0.72	0.043	0.746	>node 1 information	Atp5f1	ENSMUSG00000000563	40.9042	66.2147	53.5594	0.472568	0.95	0.44894	-1.61878	Down	MGI:1100495				>node 2 information	Atp6v1g1	ENSMUSG00000039105	26.6606	38.6864	32.6735	0.36806	0.844	0.310642	-1.45107	Down	MGI:1913540
>interaction	Ube2d3	Usp9x	10090.ENSMUSP00000101898	10090.ENSMUSP00000086716	0	0	0	0	0.217	0.683	0	0.06	0.746	>node 1 information	Ube2d3	ENSMUSG00000078578	18.9692	28.5682	23.7687	0.40385	0.754	0.304503	-1.50603	Down	MGI:1913355				>node 2 information	Usp9x	ENSMUSG00000031010	25.335	42.167	33.751	0.498711	0.853	0.425401	-1.66438	Down	MGI:894681	cell differentiation
>interaction	Top2a	Asf1b	10090.ENSMUSP00000068896	10090.ENSMUSP00000005607	0	0	0	0	0.7	0.044	0	0.188	0.746	>node 1 information	Top2a	ENSMUSG00000020914	47.0462	64.8343	55.9402	0.317984	0.955	0.303675	-1.3781	Down	MGI:98790	cell differentiation			>node 2 information	Asf1b	ENSMUSG00000005470	72.1413	101.487	86.8141	0.338029	0.99	0.334649	-1.40678	Down	MGI:1914179
>interaction	Ppp4r4	Ppp1cb	10090.ENSMUSP00000021631	10090.ENSMUSP00000015100	0	0	0	0	0	0	0.72	0.132	0.746	>node 1 information	Ppp4r4	ENSMUSG00000021209	2.1526	5.49931	3.82595	0.874738	0.369	0.322778	-2.55473	Down	MGI:1921771				>node 2 information	Ppp1cb	ENSMUSG00000014956	33.4212	51.1162	42.2687	0.418631	0.907	0.379699	-1.52945	Down	MGI:104871
>interaction	Tnp2	Prm2	10090.ENSMUSP00000053078	10090.ENSMUSP00000047925	0	0	0	0	0.375	0	0	0.609	0.745	>node 1 information	Tnp2	ENSMUSG00000043050	0.368839	4.99216	2.6805	1.7248	0.33	0.569183	-13.5348	Down	MGI:98785	cell differentiation	abnormal male fertility		>node 2 information	Prm2	ENSMUSG00000038015	0	2.30164	1.15082	2	0.252	0.504	0	Down	MGI:97766	cell differentiation
>interaction	Cbx5	Ncor2	10090.ENSMUSP00000104441	10090.ENSMUSP00000083250	0	0	0	0	0	0	0.72	0.128	0.745	>node 1 information	Cbx5	ENSMUSG00000009575	13.9573	22.5843	18.2708	0.472174	0.677	0.319662	-1.6181	Down	MGI:109372				>node 2 information	Ncor2	ENSMUSG00000029478	77.2072	56.488	66.8476	0.309947	0.974	0.301888	1.36679	Up	MGI:1337080	cell proliferation;cell differentiation
>interaction	Rbbp4	Pcgf5	10090.ENSMUSP00000099658	10090.ENSMUSP00000058730	0	0	0	0	0.054	0	0.72	0.112	0.744	>node 1 information	Rbbp4	ENSMUSG00000057236	103.011	139.545	121.278	0.301242	0.997	0.300338	-1.35466	Down	MGI:1194912				>node 2 information	Pcgf5	ENSMUSG00000024805	13.552	20.8818	17.2169	0.425733	0.662	0.281835	-1.54086	Down	MGI:1923505
>interaction	Prdx6	Pdia6	10090.ENSMUSP00000071636	10090.ENSMUSP00000052912	0.318	0	0	0	0.103	0.418	0	0.365	0.744	>node 1 information	Prdx6	ENSMUSG00000026701	36.2864	49.0025	42.6444	0.298189	0.909	0.271054	-1.35044	Down	MGI:894320				>node 2 information	Pdia6	ENSMUSG00000020571	57.0409	77.7226	67.3817	0.306933	0.975	0.29926	-1.36258	Down	MGI:1919103
>interaction	Adam10	Sirt1	10090.ENSMUSP00000063839	10090.ENSMUSP00000020257	0	0	0	0	0.054	0.535	0	0.465	0.744	>node 1 information	Adam10	ENSMUSG00000054693	36.3284	53.6473	44.9879	0.384968	0.92	0.354171	-1.47673	Down	MGI:109548	cell proliferation			>node 2 information	Sirt1	ENSMUSG00000020063	19.5441	31.9323	25.7382	0.481316	0.777	0.373982	-1.63386	Down	MGI:2135607	cell proliferation;cell differentiation	abnormal male fertility;abnormal spermatogenesis
>interaction	Usp47	Skp1a	10090.ENSMUSP00000102264	10090.ENSMUSP00000038744	0	0	0	0	0.056	0	0.72	0.111	0.744	>node 1 information	Usp47	ENSMUSG00000059263	33.1431	44.9594	39.0513	0.302584	0.89	0.2693	-1.35652	Down	MGI:1922246				>node 2 information	Skp1a	ENSMUSG00000036309	50.0088	80.2426	65.1257	0.464238	0.972	0.451239	-1.60457	Down	MGI:103575
>interaction	Ddx5	Pwp1	10090.ENSMUSP00000021062	10090.ENSMUSP00000001836	0	0	0	0	0.701	0.167	0	0.051	0.743	>node 1 information	Ddx5	ENSMUSG00000020719	44.9438	61.3357	53.1397	0.308468	0.948	0.292427	-1.36472	Down	MGI:105037	cell differentiation			>node 2 information	Pwp1	ENSMUSG00000001785	34.152	47.5857	40.8689	0.328703	0.901	0.296161	-1.39335	Down	MGI:1914735	cell differentiation
>interaction	Arid4b	H3f3b	10090.ENSMUSP00000106163	10090.ENSMUSP00000016703	0	0	0	0	0.054	0.521	0	0.477	0.742	>node 1 information	Arid4b	ENSMUSG00000039219	9.457	20.0884	14.7727	0.719665	0.622	0.447632	-2.12418	Down	MGI:2137512	cell differentiation	abnormal male fertility;abnormal spermatogenesis		>node 2 information	H3f3b	ENSMUSG00000016559	60.638	81.5386	71.0883	0.294009	0.979	0.287835	-1.34468	Down	MGI:1101768	cell proliferation;cell differentiation	abnormal male fertility
>interaction	Arid4b	Hist1h3c	10090.ENSMUSP00000106163	10090.ENSMUSP00000089346	0	0	0	0	0.054	0.521	0	0.477	0.742	>node 1 information	Arid4b	ENSMUSG00000039219	9.457	20.0884	14.7727	0.719665	0.622	0.447632	-2.12418	Down	MGI:2137512	cell differentiation	abnormal male fertility;abnormal spermatogenesis		>node 2 information	Hist1h3c	ENSMUSG00000069310	2.0088	0.542508	1.27565	1.14944	0.26	0.298855	3.7028	Up	MGI:2448320
>interaction	Rbbp4	Mtl5	10090.ENSMUSP00000099658	10090.ENSMUSP00000025840	0	0	0	0	0.146	0.642	0	0.225	0.742	>node 1 information	Rbbp4	ENSMUSG00000057236	103.011	139.545	121.278	0.301242	0.997	0.300338	-1.35466	Down	MGI:1194912				>node 2 information	Mtl5	ENSMUSG00000024905	2.98186	8.42944	5.70565	0.954769	0.421	0.401958	-2.82691	Down	MGI:1340029	cell differentiation
>interaction	Cul3	Ubl4b	10090.ENSMUSP00000130738	10090.ENSMUSP00000100577	0	0	0	0	0.054	0.4	0.153	0.526	0.741	>node 1 information	Cul3	ENSMUSG00000004364	46.4411	68.4015	57.4213	0.382443	0.959	0.366763	-1.47287	Down	MGI:1347360	cell differentiation			>node 2 information	Ubl4b	ENSMUSG00000055891	0.0951385	0.846267	0.470703	1.59576	0.177	0.282449	-8.89511	Down	MGI:1914841
>interaction	Hsp90b1	Cdk1	10090.ENSMUSP00000020238	10090.ENSMUSP00000020099	0	0	0	0	0.101	0.67	0	0.198	0.741	>node 1 information	Hsp90b1	ENSMUSG00000020048	91.776	128.922	110.349	0.336623	0.996	0.335276	-1.40475	Down	MGI:98817				>node 2 information	Cdk1	ENSMUSG00000019942	57.6102	40.4389	49.0245	0.350259	0.936	0.327843	1.42462	Up	MGI:88351	cell proliferation;cell differentiation
>interaction	Dmxl1	Skp1a	10090.ENSMUSP00000045559	10090.ENSMUSP00000038744	0	0	0	0	0	0.693	0	0.191	0.741	>node 1 information	Dmxl1	ENSMUSG00000037416	11.697	19.4462	15.5716	0.49765	0.637	0.317003	-1.66249	Down	MGI:2443926				>node 2 information	Skp1a	ENSMUSG00000036309	50.0088	80.2426	65.1257	0.464238	0.972	0.451239	-1.60457	Down	MGI:103575
>interaction	Smarca1	Hdac2	10090.ENSMUSP00000076769	10090.ENSMUSP00000019911	0	0	0	0	0.183	0.365	0.147	0.482	0.74	>node 1 information	Smarca1	ENSMUSG00000031099	13.2549	22.5757	17.9153	0.52027	0.672	0.349622	-1.7032	Down	MGI:1935127	cell proliferation;cell differentiation			>node 2 information	Hdac2	ENSMUSG00000019777	62.0497	84.1093	73.0795	0.301858	0.981	0.296122	-1.35552	Down	MGI:1097691	cell proliferation;cell differentiation
>interaction	Ypel5	Rmnd5a	10090.ENSMUSP00000037764	10090.ENSMUSP00000002292	0	0	0	0	0.103	0.683	0	0.158	0.739	>node 1 information	Ypel5	ENSMUSG00000039770	18.9217	28.44	23.6808	0.401941	0.752	0.302259	-1.50304	Down	MGI:1916937				>node 2 information	Rmnd5a	ENSMUSG00000002222	30.2216	48.9253	39.5735	0.472633	0.893	0.422061	-1.61889	Down	MGI:1915727
>interaction	Prm2	Prm1	10090.ENSMUSP00000047925	10090.ENSMUSP00000023144	0	0	0	0	0.362	0	0	0.609	0.739	>node 1 information	Prm2	ENSMUSG00000038015	0	2.30164	1.15082	2	0.252	0.504	0	Down	MGI:97766	cell differentiation			>node 2 information	Prm1	ENSMUSG00000022501	0.0136858	2.95697	1.48533	1.98157	0.273	0.540969	-216.061	Down	MGI:97765	cell differentiation
>interaction	Snai1	Pou5f1	10090.ENSMUSP00000050581	10090.ENSMUSP00000025271	0	0	0	0	0	0.058	0	0.734	0.739	>node 1 information	Snai1	ENSMUSG00000042821	10.7679	5.23635	8.00212	0.69126	0.478	0.330422	2.05638	Up	MGI:98330	cell differentiation			>node 2 information	Pou5f1	ENSMUSG00000024406	14.7539	6.6145	10.6842	0.761817	0.541	0.412143	2.23054	Up	MGI:101893	cell differentiation	abnormal male fertility
>interaction	Ppp3r1	Smek2	10090.ENSMUSP00000099944	10090.ENSMUSP00000020755	0	0	0	0	0.107	0	0.72	0	0.739	>node 1 information	Ppp3r1	ENSMUSG00000033953	33.0538	45.3989	39.2263	0.314714	0.891	0.280411	-1.37349	Down	MGI:107172	cell differentiation			>node 2 information	Smek2	ENSMUSG00000020463	33.8886	53.3522	43.6204	0.446204	0.914	0.407831	-1.57434	Down	MGI:2144474
>interaction	Arfip1	Arf4	10090.ENSMUSP00000122964	10090.ENSMUSP00000022429	0	0	0	0	0.089	0.27	0.372	0.449	0.739	>node 1 information	Arfip1	ENSMUSG00000074513	12.061	19.8888	15.9749	0.490006	0.643	0.315074	-1.64902	Down	MGI:1277120				>node 2 information	Arf4	ENSMUSG00000021877	29.5103	47.5103	38.5103	0.467407	0.887	0.41459	-1.60996	Down	MGI:99433
>interaction	Ppp3r1	Ppp1cb	10090.ENSMUSP00000099944	10090.ENSMUSP00000015100	0	0	0	0	0.086	0.042	0.72	0.062	0.739	>node 1 information	Ppp3r1	ENSMUSG00000033953	33.0538	45.3989	39.2263	0.314714	0.891	0.280411	-1.37349	Down	MGI:107172	cell differentiation			>node 2 information	Ppp1cb	ENSMUSG00000014956	33.4212	51.1162	42.2687	0.418631	0.907	0.379699	-1.52945	Down	MGI:104871
>interaction	Tax1bp1	Rnf11	10090.ENSMUSP00000079548	10090.ENSMUSP00000030284	0	0	0	0	0.104	0.478	0	0.481	0.737	>node 1 information	Tax1bp1	ENSMUSG00000004535	44.2656	60.0532	52.1594	0.30268	0.946	0.286335	-1.35666	Down	MGI:1289308				>node 2 information	Rnf11	ENSMUSG00000028557	21.9339	37.7774	29.8557	0.53067	0.819	0.434619	-1.72233	Down	MGI:1352759
>interaction	Alcam	Eng	10090.ENSMUSP00000023312	10090.ENSMUSP00000009705	0	0	0	0	0	0	0	0.737	0.737	>node 1 information	Alcam	ENSMUSG00000022636	9.12365	17.4708	13.2972	0.627736	0.594	0.372875	-1.91489	Down	MGI:1313266	cell differentiation			>node 2 information	Eng	ENSMUSG00000026814	11.9543	4.61291	8.2836	0.886255	0.484	0.428948	2.59149	Up	MGI:95392	cell proliferation;cell differentiation
>interaction	Rbm39	Tardbp	10090.ENSMUSP00000105216	10090.ENSMUSP00000081142	0	0	0	0	0.209	0.682	0	0	0.737	>node 1 information	Rbm39	ENSMUSG00000027620	61.1076	86.0404	73.574	0.338881	0.982	0.332781	-1.40801	Down	MGI:2157953				>node 2 information	Tardbp	ENSMUSG00000041459	16.0841	24.3631	20.2236	0.409373	0.708	0.289836	-1.51473	Down	MGI:2387629
>interaction	H2-T23	Jun	10090.ENSMUSP00000099739	10090.ENSMUSP00000054270	0	0	0	0	0	0	0.365	0.603	0.737	>node 1 information	H2-T23	ENSMUSG00000067212	0.189335	1.37218	0.780757	1.515	0.219	0.331784	-7.24737	Down	MGI:95957	cell proliferation			>node 2 information	Jun	ENSMUSG00000052684	51.1912	37.6828	44.437	0.30399	0.917	0.278759	1.35848	Up	MGI:96646	cell proliferation;cell differentiation
>interaction	Ppp1cc	Smek2	10090.ENSMUSP00000099587	10090.ENSMUSP00000020755	0	0	0	0	0.09	0	0.72	0.053	0.737	>node 1 information	Ppp1cc	ENSMUSG00000004455	31.299	43.4603	37.3796	0.325345	0.88	0.286304	-1.38855	Down	MGI:104872	cell differentiation	abnormal male fertility		>node 2 information	Smek2	ENSMUSG00000020463	33.8886	53.3522	43.6204	0.446204	0.914	0.407831	-1.57434	Down	MGI:2144474
>interaction	Ppp3r1	Ppp4r4	10090.ENSMUSP00000099944	10090.ENSMUSP00000021631	0	0	0	0	0.095	0	0.72	0	0.736	>node 1 information	Ppp3r1	ENSMUSG00000033953	33.0538	45.3989	39.2263	0.314714	0.891	0.280411	-1.37349	Down	MGI:107172	cell differentiation			>node 2 information	Ppp4r4	ENSMUSG00000021209	2.1526	5.49931	3.82595	0.874738	0.369	0.322778	-2.55473	Down	MGI:1921771
>interaction	Ddx50	Pwp1	10090.ENSMUSP00000020270	10090.ENSMUSP00000001836	0	0	0	0	0.693	0.167	0	0.051	0.736	>node 1 information	Ddx50	ENSMUSG00000020076	22.7757	34.4382	28.607	0.407681	0.807	0.328998	-1.51206	Down	MGI:2182303				>node 2 information	Pwp1	ENSMUSG00000001785	34.152	47.5857	40.8689	0.328703	0.901	0.296161	-1.39335	Down	MGI:1914735	cell differentiation
>interaction	Cbr1	Gldc	10090.ENSMUSP00000049394	10090.ENSMUSP00000025778	0.086	0	0	0	0.051	0	0.595	0.335	0.735	>node 1 information	Cbr1	ENSMUSG00000051483	30.0508	19.3036	24.6772	0.435512	0.766	0.333602	1.55675	Up	MGI:88284				>node 2 information	Gldc	ENSMUSG00000024827	25.6281	15.4695	20.5488	0.494365	0.712	0.351988	1.65669	Up	MGI:1341155
>interaction	Rad21l	Esco2	10090.ENSMUSP00000094174	10090.ENSMUSP00000022613	0	0	0	0	0.054	0.412	0	0.562	0.735	>node 1 information	Rad21l	ENSMUSG00000074704	3.57825	10.297	6.93762	0.968451	0.454	0.439677	-2.87766	Down	MGI:3652039		abnormal male fertility		>node 2 information	Esco2	ENSMUSG00000022034	18.4805	29.4755	23.978	0.458545	0.756	0.34666	-1.59495	Down	MGI:1919238	cell differentiation
>interaction	Uba6	Mocs2	10090.ENSMUSP00000035328	10090.ENSMUSP00000015680	0.318	0	0	0	0.068	0.108	0.484	0.235	0.735	>node 1 information	Uba6	ENSMUSG00000035898	16.5199	28.092	22.3059	0.51879	0.736	0.381829	-1.70049	Down	MGI:1913894				>node 2 information	Mocs2	ENSMUSG00000015536	11.0406	20.5654	15.803	0.602721	0.641	0.386344	-1.86271	Down	MGI:1336894
>interaction	Pcgf5	Bmi1	10090.ENSMUSP00000058730	10090.ENSMUSP00000028071	0	0	0	0.829	0	0.048	0.72	0.288	0.734	>node 1 information	Pcgf5	ENSMUSG00000024805	13.552	20.8818	17.2169	0.425733	0.662	0.281835	-1.54086	Down	MGI:1923505				>node 2 information	Bmi1	ENSMUSG00000026739	17.039	25.2217	21.1303	0.387249	0.721	0.279206	-1.48023	Down	MGI:88174	cell proliferation;cell differentiation
>interaction	Fxyd1	Atp2a2	10090.ENSMUSP00000048460	10090.ENSMUSP00000031423	0	0	0	0	0.118	0.062	0.54	0.383	0.734	>node 1 information	Fxyd1	ENSMUSG00000036570	10.4663	3.31664	6.89147	1.03747	0.452	0.468934	3.15569	Up	MGI:1889273				>node 2 information	Atp2a2	ENSMUSG00000029467	38.0411	51.0735	44.5573	0.292486	0.918	0.268502	-1.34259	Down	MGI:88110	cell differentiation
>interaction	Agt	Mmp9	10090.ENSMUSP00000066488	10090.ENSMUSP00000017881	0	0	0	0	0.044	0.057	0	0.727	0.733	>node 1 information	Agt	ENSMUSG00000031980	22.6404	7.063	14.8517	1.04886	0.624	0.654491	3.20549	Up	MGI:87963	cell proliferation;cell differentiation			>node 2 information	Mmp9	ENSMUSG00000017737	8.08981	4.25239	6.1711	0.621837	0.433	0.269256	1.90241	Up	MGI:97011	cell proliferation
>interaction	Cdk14	Bub1	10090.ENSMUSP00000030763	10090.ENSMUSP00000028858	0	0	0	0	0.265	0.348	0.3	0.298	0.733	>node 1 information	Cdk14	ENSMUSG00000028926	13.3817	8.02872	10.7052	0.500035	0.541	0.270519	1.66673	Up	MGI:894318				>node 2 information	Bub1	ENSMUSG00000027379	25.1238	36.3607	30.7422	0.36552	0.828	0.30265	-1.44726	Down	MGI:1100510		abnormal male fertility;abnormal spermatogenesis
>interaction	Acsf2	Acad8	10090.ENSMUSP00000099453	10090.ENSMUSP00000054370	0.318	0	0	0	0.125	0	0.484	0.238	0.733	>node 1 information	Acsf2	ENSMUSG00000076435	19.2961	11.3326	15.3143	0.520002	0.632	0.328642	1.70271	Up	MGI:2388287				>node 2 information	Acad8	ENSMUSG00000031969	10.2233	19.9453	15.0843	0.644511	0.629	0.405398	-1.95096	Down	MGI:1914198
>interaction	Usp47	Fbxl3	10090.ENSMUSP00000102264	10090.ENSMUSP00000022720	0	0	0	0	0.088	0	0.72	0	0.733	>node 1 information	Usp47	ENSMUSG00000059263	33.1431	44.9594	39.0513	0.302584	0.89	0.2693	-1.35652	Down	MGI:1922246				>node 2 information	Fbxl3	ENSMUSG00000022124	19.264	29.4556	24.3598	0.418378	0.763	0.319222	-1.52905	Down	MGI:1354702
>interaction	Ppp1cc	Smc4	10090.ENSMUSP00000099587	10090.ENSMUSP00000047872	0	0	0	0	0.159	0.687	0	0.065	0.732	>node 1 information	Ppp1cc	ENSMUSG00000004455	31.299	43.4603	37.3796	0.325345	0.88	0.286304	-1.38855	Down	MGI:104872	cell differentiation	abnormal male fertility		>node 2 information	Smc4	ENSMUSG00000034349	22.8962	42.0519	32.474	0.589877	0.842	0.496677	-1.83663	Down	MGI:1917349
>interaction	Esco2	Cdk1	10090.ENSMUSP00000022613	10090.ENSMUSP00000020099	0	0	0	0	0.651	0.167	0	0.153	0.732	>node 1 information	Esco2	ENSMUSG00000022034	18.4805	29.4755	23.978	0.458545	0.756	0.34666	-1.59495	Down	MGI:1919238	cell differentiation			>node 2 information	Cdk1	ENSMUSG00000019942	57.6102	40.4389	49.0245	0.350259	0.936	0.327843	1.42462	Up	MGI:88351	cell proliferation;cell differentiation
>interaction	Arfip1	Arf5	10090.ENSMUSP00000122964	10090.ENSMUSP00000020717	0	0	0	0	0.043	0.27	0.372	0.46	0.731	>node 1 information	Arfip1	ENSMUSG00000074513	12.061	19.8888	15.9749	0.490006	0.643	0.315074	-1.64902	Down	MGI:1277120				>node 2 information	Arf5	ENSMUSG00000020440	78.8206	41.2647	60.0427	0.625487	0.964	0.60297	1.91012	Up	MGI:99434
>interaction	Rere	Rbbp4	10090.ENSMUSP00000101307	10090.ENSMUSP00000099658	0	0	0	0	0	0	0.72	0.08	0.731	>node 1 information	Rere	ENSMUSG00000039852	58.23	42.8225	50.5262	0.304941	0.942	0.287254	1.3598	Up	MGI:2683486	cell proliferation;cell differentiation			>node 2 information	Rbbp4	ENSMUSG00000057236	103.011	139.545	121.278	0.301242	0.997	0.300338	-1.35466	Down	MGI:1194912
>interaction	Magt1	Ssr3	10090.ENSMUSP00000033583	10090.ENSMUSP00000029414	0	0	0	0	0.493	0.491	0	0	0.731	>node 1 information	Magt1	ENSMUSG00000031232	10.1111	16.1255	13.1183	0.458474	0.59	0.2705	-1.59483	Down	MGI:1914325				>node 2 information	Ssr3	ENSMUSG00000027828	37.4908	53.6009	45.5459	0.353712	0.922	0.326122	-1.42971	Down	MGI:1914687
>interaction	Pcgf5	Hdac2	10090.ENSMUSP00000058730	10090.ENSMUSP00000019911	0	0	0	0	0.049	0.073	0.72	0	0.731	>node 1 information	Pcgf5	ENSMUSG00000024805	13.552	20.8818	17.2169	0.425733	0.662	0.281835	-1.54086	Down	MGI:1923505				>node 2 information	Hdac2	ENSMUSG00000019777	62.0497	84.1093	73.0795	0.301858	0.981	0.296122	-1.35552	Down	MGI:1097691	cell proliferation;cell differentiation
>interaction	Gmps	Ddx5	10090.ENSMUSP00000029405	10090.ENSMUSP00000021062	0.048	0	0	0	0.509	0.115	0	0.426	0.731	>node 1 information	Gmps	ENSMUSG00000027823	30.2407	41.7003	35.9705	0.318583	0.871	0.277486	-1.37895	Down	MGI:2448526				>node 2 information	Ddx5	ENSMUSG00000020719	44.9438	61.3357	53.1397	0.308468	0.948	0.292427	-1.36472	Down	MGI:105037	cell differentiation
>interaction	Trpm7	Pkd2	10090.ENSMUSP00000099513	10090.ENSMUSP00000084041	0	0	0	0	0	0	0	0.73	0.73	>node 1 information	Trpm7	ENSMUSG00000027365	19.6085	28.0711	23.8398	0.354978	0.754	0.267653	-1.43158	Down	MGI:1929996				>node 2 information	Pkd2	ENSMUSG00000034462	18.1524	28.9278	23.5401	0.457747	0.751	0.343768	-1.59361	Down	MGI:1099818	cell proliferation
>interaction	Ssr3	Sec11c	10090.ENSMUSP00000029414	10090.ENSMUSP00000025394	0	0	0	0	0.707	0	0	0.119	0.73	>node 1 information	Ssr3	ENSMUSG00000027828	37.4908	53.6009	45.5459	0.353712	0.922	0.326122	-1.42971	Down	MGI:1914687				>node 2 information	Sec11c	ENSMUSG00000024516	9.92119	16.7103	13.3157	0.509856	0.595	0.303364	-1.6843	Down	MGI:1913536
[truncated: 85 more rows]
