# Supplementary material for: Bioinformatics Analysis of Transcriptomic Data Reveals Refined Functional Networks for the Self-Renewal of Mouse Spermatogonial Stem Cells
Source: Stem Cells Int. 2018 Jul 8;2018:5842714. doi: 10.1155/2018/5842714 (PMC6079398; doi:10.1155/2018/5842714)
Supplement: Supplementary Materials — Supplementary data 1: detailed list for gene expression and annotation. Supplementary data 2: detailed results of dynamic screening of candidate genes. Supplementary data 3: detailed information for the refined network. Supplementary data 4: detailed results of functional enrichment analyses. [file 5842714.f1.zip › Supplementary data 4.xlsx]

## Sheet: Sheet1
Criteria class	Functional class	Term ID	Term	Gene count	FDR	Matched proteins	Gene list
Refined	KEGG pathway	4010	MAPK signaling pathway	21	2.66e-05	ENSMUSP00000003442,ENSMUSP00000007757,ENSMUSP00000015749,ENSMUSP00000017435,ENSMUSP00000017552,ENSMUSP00000020118,ENSMUSP00000020634,ENSMUSP00000023779,ENSMUSP00000025025,ENSMUSP00000026217,ENSMUSP00000035045,ENSMUSP00000044034,ENSMUSP00000047888,ENSMUSP00000052020,ENSMUSP00000054270,ENSMUSP00000066238,ENSMUSP00000080694,ENSMUSP00000098997,ENSMUSP00000099944,ENSMUSP00000105179,ENSMUSP00000108468	Cacnb1,Cacnb3,Cacng5,Chuk,Dusp1,Dusp6,Flna,Flnb,Gadd45a,Jun,Mapk10,Mapk9,Mras,Nr4a1,Ppp3r1,Rap1b,Rasa1,Rps6ka6,Srf,Taok1,Tgfbr1
Refined	KEGG pathway	4151	PI3K-Akt signaling pathway	21	0.000849	ENSMUSP00000001147,ENSMUSP00000001181,ENSMUSP00000002979,ENSMUSP00000003964,ENSMUSP00000006614,ENSMUSP00000014743,ENSMUSP00000020238,ENSMUSP00000023779,ENSMUSP00000026217,ENSMUSP00000028663,ENSMUSP00000030787,ENSMUSP00000031668,ENSMUSP00000033898,ENSMUSP00000037712,ENSMUSP00000044048,ENSMUSP00000044227,ENSMUSP00000089703,ENSMUSP00000099360,ENSMUSP00000100920,ENSMUSP00000103960,ENSMUSP00000119715	Ccne2,Chuk,Col1a2,Col4a1,Col6a1,Col6a2,Creb3l1,Csf1,Epha2,Gh,Gys1,Hsp90b1,Itga9,Kitl,Lama3,Lamb1,Lpar3,Mcl1,Nr4a1,Rheb,Rps6kb1
Refined	KEGG pathway	4014	Ras signaling pathway	16	0.000894	ENSMUSP00000004565,ENSMUSP00000006614,ENSMUSP00000014743,ENSMUSP00000020634,ENSMUSP00000026217,ENSMUSP00000030524,ENSMUSP00000031495,ENSMUSP00000035045,ENSMUSP00000043146,ENSMUSP00000064084,ENSMUSP00000066238,ENSMUSP00000079991,ENSMUSP00000099928,ENSMUSP00000100920,ENSMUSP00000105179,ENSMUSP00000108468	Chuk,Csf1,Epha2,Kitl,Mapk10,Mapk9,Mras,Pla2g1b,Pla2g5,Plcg2,Ralb,Rap1b,Rasa1,Rasal3,Rel,Shc4
Refined	KEGG pathway	4310	Wnt signaling pathway	11	0.00475	ENSMUSP00000014370,ENSMUSP00000019362,ENSMUSP00000020634,ENSMUSP00000020904,ENSMUSP00000023561,ENSMUSP00000038744,ENSMUSP00000054270,ENSMUSP00000084055,ENSMUSP00000099944,ENSMUSP00000108468,ENSMUSP00000113341	Cacybp,Csnk1e,Dvl2,Jun,Mapk10,Mapk9,Ppp3r1,Rock2,Senp2,Skp1a,Tcf7
Refined	KEGG pathway	4022	cGMP-PKG signaling pathway	12	0.00519	ENSMUSP00000015100,ENSMUSP00000015749,ENSMUSP00000020904,ENSMUSP00000028663,ENSMUSP00000031423,ENSMUSP00000032561,ENSMUSP00000034983,ENSMUSP00000035429,ENSMUSP00000069549,ENSMUSP00000074259,ENSMUSP00000099587,ENSMUSP00000099944	Atp1b3,Atp2a2,Creb3l1,Fxyd2,Gnai1,Ppp1cb,Ppp1cc,Ppp3r1,Rock1,Rock2,Srf,Vasp
Refined	KEGG pathway	4668	TNF signaling pathway	9	0.00774	ENSMUSP00000014743,ENSMUSP00000017881,ENSMUSP00000020634,ENSMUSP00000026217,ENSMUSP00000028663,ENSMUSP00000031327,ENSMUSP00000054270,ENSMUSP00000091422,ENSMUSP00000108468	Birc2,Chuk,Creb3l1,Csf1,Cxcl1,Jun,Mapk10,Mapk9,Mmp9
Refined	KEGG pathway	4621	NOD-like receptor signaling pathway	6	0.0124	ENSMUSP00000020238,ENSMUSP00000020634,ENSMUSP00000026217,ENSMUSP00000031327,ENSMUSP00000091422,ENSMUSP00000108468	Birc2,Chuk,Cxcl1,Hsp90b1,Mapk10,Mapk9
Refined	KEGG pathway	4012	ErbB signaling pathway	7	0.0179	ENSMUSP00000020634,ENSMUSP00000032066,ENSMUSP00000043146,ENSMUSP00000054270,ENSMUSP00000079991,ENSMUSP00000108468,ENSMUSP00000119715	Jun,Mapk10,Mapk9,Plcg2,Rps6kb1,Shc4,Tgfa
Refined	KEGG pathway	4015	Rap1 signaling pathway	11	0.0405	ENSMUSP00000004565,ENSMUSP00000006614,ENSMUSP00000014743,ENSMUSP00000032561,ENSMUSP00000035045,ENSMUSP00000037712,ENSMUSP00000066238,ENSMUSP00000068890,ENSMUSP00000073618,ENSMUSP00000074259,ENSMUSP00000100920	Csf1,Epha2,Gnai1,Kitl,Lpar3,Mras,Pfn2,Ralb,Rap1b,Sipa1,Vasp
Refined	KEGG pathway	4068	FoxO signaling pathway	8	0.0496	ENSMUSP00000007757,ENSMUSP00000020257,ENSMUSP00000020634,ENSMUSP00000026217,ENSMUSP00000044034,ENSMUSP00000099716,ENSMUSP00000108468,ENSMUSP00000113341	Chuk,Csnk1e,Foxo6,Gadd45a,Mapk10,Mapk9,Sirt1,Tgfbr1
Refined	KEGG pathway	4921	Oxytocin signaling pathway	12	0.00296	ENSMUSP00000003442,ENSMUSP00000015100,ENSMUSP00000017552,ENSMUSP00000020904,ENSMUSP00000047888,ENSMUSP00000051132,ENSMUSP00000054270,ENSMUSP00000069549,ENSMUSP00000074259,ENSMUSP00000099587,ENSMUSP00000099944,ENSMUSP00000137123	Cacnb1,Cacnb3,Cacng5,Gnai1,Jun,Oxtr,Ppp1cb,Ppp1cc,Ppp3r1,Rock1,Rock2,Ryr1
Refined	KEGG pathway	4261	Adrenergic signaling in cardiomyocytes	10	0.0116	ENSMUSP00000003442,ENSMUSP00000015100,ENSMUSP00000017552,ENSMUSP00000028663,ENSMUSP00000031423,ENSMUSP00000034983,ENSMUSP00000035429,ENSMUSP00000047888,ENSMUSP00000074259,ENSMUSP00000099587	Atp1b3,Atp2a2,Cacnb1,Cacnb3,Cacng5,Creb3l1,Fxyd2,Gnai1,Ppp1cb,Ppp1cc
Refined	KEGG pathway	4915	Estrogen signaling pathway	7	0.0278	ENSMUSP00000017881,ENSMUSP00000020238,ENSMUSP00000028663,ENSMUSP00000034187,ENSMUSP00000043146,ENSMUSP00000054270,ENSMUSP00000074259	Creb3l1,Gnai1,Hsp90b1,Jun,Mmp2,Mmp9,Shc4
Refined	Biological process	GO.0006915	apoptotic process	39	0.00033	ENSMUSP00000000450,ENSMUSP00000000594,ENSMUSP00000004565,ENSMUSP00000005548,ENSMUSP00000006614,ENSMUSP00000007757,ENSMUSP00000017435,ENSMUSP00000017881,ENSMUSP00000018113,ENSMUSP00000020099,ENSMUSP00000020257,ENSMUSP00000020634,ENSMUSP00000020904,ENSMUSP00000021062,ENSMUSP00000022378,ENSMUSP00000023774,ENSMUSP00000023779,ENSMUSP00000028239,ENSMUSP00000028858,ENSMUSP00000029846,ENSMUSP00000032201,…	Birc2,Bub1,C1d,Cck,Cdk1,Cul3,Cyr61,Ddx5,Epha2,Ero1l,Gsk3a,Gsn,Hmox1,Jun,Kitl,Mapk9,Mcl1,Mmp9,Nr4a1,Pparg,Ptgis,Ralb,Ret,Rock1,Rock2,Rps6kb1,S100a8,S100a9,Shb,Shc4,Sirt1,Slc11a2,Taok1,Tardbp,Tax1bp1,Tgfbr1,Top2a,Ube2d3,Usp47
Refined	Biological process	GO.0030154	cell differentiation	151	9.55e-21	ENSMUSP00000000450,ENSMUSP00000000542,ENSMUSP00000001599,ENSMUSP00000002979,ENSMUSP00000003645,ENSMUSP00000004055,ENSMUSP00000006614,ENSMUSP00000007757,ENSMUSP00000008684,ENSMUSP00000009705,ENSMUSP00000009740,ENSMUSP00000010736,ENSMUSP00000014370,ENSMUSP00000014743,ENSMUSP00000015749,ENSMUSP00000016771,ENSMUSP00000017629,ENSMUSP00000017881,ENSMUSP00000018842,ENSMUSP00000019911,ENSMUSP00000020004,…	Acsl6,Acta2,Acvrl1,Adcyap1r1,Aff4,Alcam,Aldh1a2,Ar,Arf4,Arid4b,Asf1a,Atf1,Atp2a2,Bin1,Cacybp,Cand1,Cbr1,Cck,Cdh3,Cdk1,Cdk5r2,Cebpa,Cfl2,Chuk,Cmtm7,Col13a1,Col4a1,Cops2,Creb3l1,Csf1,Ctsl,Cul3,Cyb5d2,Cyp11a1,Cyp26a1,Cyr61,Dazl,Dld,Dmc1,Dusp6,Dzip1,Egr2,Eng,Epas1,Epha2,Ercc1,Ero1l,Esco2,Etv4,Flna,Flnb,Foxo6,Gata1,Gh,Gsn,Hdac2,Hells,Hfm1,Hopx,Hprt,Ift74,Ireb2,Jun,Kitl,Klhl10,Lama3,Lamb1,Ldb2,Lhx1,Lpa…
Refined	Biological process	GO.0008283	cell proliferation	23	0.0185	ENSMUSP00000003645,ENSMUSP00000005292,ENSMUSP00000006614,ENSMUSP00000014743,ENSMUSP00000019362,ENSMUSP00000023359,ENSMUSP00000025965,ENSMUSP00000026217,ENSMUSP00000026723,ENSMUSP00000028635,ENSMUSP00000030456,ENSMUSP00000032066,ENSMUSP00000035289,ENSMUSP00000040089,ENSMUSP00000050292,ENSMUSP00000051092,ENSMUSP00000060433,ENSMUSP00000066238,ENSMUSP00000077289,ENSMUSP00000083250,ENSMUSP00000099360,…	Acsl6,Chuk,Cops2,Csf1,Dvl2,Epha2,Ercc1,Gh,Hells,Hprt,Impdh1,Nasp,Ncor2,Nde1,Picalm,Polr3g,Prdx2,Ptges3,Rap1b,Rere,Shb,Tgfa,Twist1
Refined	Biological process	GO.0051321	meiotic cell cycle	16	6.53e-05	ENSMUSP00000009814,ENSMUSP00000010736,ENSMUSP00000016771,ENSMUSP00000017629,ENSMUSP00000020252,ENSMUSP00000020657,ENSMUSP00000023068,ENSMUSP00000027579,ENSMUSP00000029448,ENSMUSP00000047872,ENSMUSP00000068896,ENSMUSP00000079909,ENSMUSP00000094174,ENSMUSP00000108310,ENSMUSP00000118994,ENSMUSP00000131871	Actr3,Dazl,Hfm1,Myh9,Prdm9,Rad21l,Smc1b,Smc4,Spdya,Sycp1,Sycp2,Sycp3,Tex11,Top2a,Top2b,Ube2b
Refined	Biological process	GO.0042981	regulation of apoptotic process	66	7.24e-10	ENSMUSP00000000450,ENSMUSP00000005064,ENSMUSP00000005292,ENSMUSP00000007757,ENSMUSP00000009814,ENSMUSP00000017435,ENSMUSP00000017881,ENSMUSP00000018113,ENSMUSP00000019911,ENSMUSP00000020099,ENSMUSP00000020118,ENSMUSP00000020238,ENSMUSP00000020252,ENSMUSP00000020257,ENSMUSP00000020543,ENSMUSP00000020657,ENSMUSP00000021077,ENSMUSP00000021523,ENSMUSP00000023774,ENSMUSP00000023779,ENSMUSP00000024884,…	Aldh1a2,Ar,Bin1,Birc2,Bmi1,Bub1,Cck,Cdk1,Cpeb4,Creb3l1,Cyld,Cyr61,Dusp6,Egr2,Eif2ak2,Flna,Gadd45a,Gata1,Gsk3a,Gsn,Hdac2,Hells,Hsp90b1,Kitl,Mcl1,Mmp9,Mnat1,Naa15,Ncl,Nr4a1,Pax8,Pf4,Pias4,Pparg,Ppt1,Prdx2,Ptgis,Ret,Rock1,Rps6kb1,S100a8,S100a9,Sct,Setx,Sirt1,Slc11a2,Slc9a3r1,Smad6,Snai1,Sox10,Sycp2,Sycp3,Taok1,Tax1bp1,Tcf7,Tdgf1,Tex11,Tgfa,Tgfbr1,Tgm2,Top2a,Twist1,Ube2b,Usp47,Vhl,Vnn1
Refined	Biological process	GO.0045595	regulation of cell differentiation	60	3.48e-05	ENSMUSP00000000450,ENSMUSP00000000542,ENSMUSP00000005292,ENSMUSP00000007757,ENSMUSP00000014743,ENSMUSP00000015749,ENSMUSP00000017692,ENSMUSP00000018842,ENSMUSP00000019911,ENSMUSP00000020118,ENSMUSP00000020257,ENSMUSP00000020904,ENSMUSP00000021062,ENSMUSP00000021091,ENSMUSP00000023535,ENSMUSP00000023769,ENSMUSP00000024884,ENSMUSP00000025239,ENSMUSP00000025271,ENSMUSP00000025293,ENSMUSP00000028071,…	Acvrl1,Ar,Atf1,Bin1,Bmi1,C1qc,Cebpa,Csf1,Cyb5d2,Cyld,Cyr61,Ddx5,Dusp6,Eif2ak2,Etv5,Flna,Gata1,Gh,Gsk3a,Hdac2,Hopx,Iqcb1,Kitl,Ldb2,Lhx1,Lpar3,Med21,Mgll,Morf4l2,Ncor2,Ndfip1,Pafah1b1,Pax8,Pdlim7,Pf4,Plxnb1,Pou5f1,Pparg,Prdx2,Rheb,Rock1,Rock2,Sall1,Sct,Setx,Shb,Sirt1,Snai1,Sox10,Srf,Srsf6,Suz12,Tead2,Tgfbr1,Thy1,Tle6,Tmsb4x,Twist1,Vhl,Vnn1
Refined	Biological process	GO.0042127	regulation of cell proliferation	60	2.31e-06	ENSMUSP00000000450,ENSMUSP00000000542,ENSMUSP00000005548,ENSMUSP00000007757,ENSMUSP00000009705,ENSMUSP00000014743,ENSMUSP00000015234,ENSMUSP00000015749,ENSMUSP00000017692,ENSMUSP00000018842,ENSMUSP00000019362,ENSMUSP00000019911,ENSMUSP00000020257,ENSMUSP00000020624,ENSMUSP00000021077,ENSMUSP00000021523,ENSMUSP00000021933,ENSMUSP00000023779,ENSMUSP00000024884,ENSMUSP00000025293,ENSMUSP00000028071,…	Acvrl1,Adam10,Aldh1a2,Ar,Arhgap5,Bmi1,Cck,Cdh3,Cebpa,Cnot6,Cnot7,Csf1,Ctsl,Cxcl1,Cyr61,Dvl2,Eif2ak2,Eng,Etv4,Etv5,Fbxo2,Fxyd2,Gata1,H2-T23,Hdac2,Hmox1,Ift74,Kitl,Lhx1,Mnat1,Ndfip1,Npm1,Nr4a1,Pf4,Pkd2,Plxnb1,Pparg,Ptgds,Rps6kb1,Sall1,Shc4,Sirt1,Sirt6,Slc9a3r1,Smad6,Smarca1,Sox10,Spdya,Spry1,Srf,Srsf6,Suz12,Tcf7,Tdgf1,Tgfa,Tgfbr1,Tipin,Twist1,Yes1,Zmiz1
Refined	Biological process	GO.0007283	spermatogenesis	31	1.16e-06	ENSMUSP00000001599,ENSMUSP00000003645,ENSMUSP00000004055,ENSMUSP00000009740,ENSMUSP00000010736,ENSMUSP00000020252,ENSMUSP00000020257,ENSMUSP00000020657,ENSMUSP00000021933,ENSMUSP00000023065,ENSMUSP00000023144,ENSMUSP00000024916,ENSMUSP00000025840,ENSMUSP00000027374,ENSMUSP00000027438,ENSMUSP00000029448,ENSMUSP00000047925,ENSMUSP00000051479,ENSMUSP00000051492,ENSMUSP00000052648,ENSMUSP00000053078,…	Adcyap1r1,Aff4,Ar,Arid4b,Ctsl,Dazl,Dld,Dmc1,Dzip1,Ercc1,Etv5,Gal3st1,Hfm1,Klhl10,Lhcgr,Mtl5,Ncl,Pgm3,Prdm9,Prm1,Prm2,Rad21l,Setx,Sirt1,Spata5,Sycp1,Sycp3,Taf7l,Tnp1,Tnp2,Ube2b
Refined	Biological process	GO.0048863	stem cell differentiation	18	0.00222	ENSMUSP00000007757,ENSMUSP00000015749,ENSMUSP00000025271,ENSMUSP00000025946,ENSMUSP00000032201,ENSMUSP00000032429,ENSMUSP00000034090,ENSMUSP00000034723,ENSMUSP00000039466,ENSMUSP00000040089,ENSMUSP00000043146,ENSMUSP00000050581,ENSMUSP00000067737,ENSMUSP00000098997,ENSMUSP00000099944,ENSMUSP00000100920,ENSMUSP00000128729,ENSMUSP00000129261	Aldh1a2,Cyp26a1,Etv4,Flna,Kitl,Ldb2,Med21,Pou5f1,Ppp3r1,Ret,Sall1,Sct,Shc4,Snai1,Sox10,Srf,Tgfbr1,Twist1
P value	Biological process	GO.0030154	cell differentiation	159	3.1e-10	ENSMUSP00000000199,ENSMUSP00000000220,ENSMUSP00000000312,ENSMUSP00000000450,ENSMUSP00000000542,ENSMUSP00000000641,ENSMUSP00000002389,ENSMUSP00000002979,ENSMUSP00000003066,ENSMUSP00000003808,ENSMUSP00000005352,ENSMUSP00000006614,ENSMUSP00000007757,ENSMUSP00000009241,ENSMUSP00000016488,ENSMUSP00000017610,ENSMUSP00000017841,ENSMUSP00000017881,ENSMUSP00000020118,ENSMUSP00000020204,ENSMUSP00000020252,…	Acsl6,Acta2,Acvrl1,Ada,Adcyap1r1,Alcam,Aldh1a2,Aldh6a1,Alpl,Ap1s2,Apoe,Ar,Arntl,Arx,Atxn1,B2m,Basp1,Bin1,Bloc1s4,Capn2,Capn5,Cbr1,Cck,Cd3e,Cdh1,Cdh3,Cdk5r2,Cebpa,Chd7,Chst11,Cmtm7,Cntn4,Col13a1,Corin,Cplx2,Creb3l1,Crebl2,Csrp2,Cxcr7,Cyr61,Dapl1,Dmc1,Dmrtc1a,Dusp6,E2f8,Edn1,Eomes,Epas1,Epha2,Etv3,Etv4,Farp1,Fbxo40,Fev,Flnb,Fndc3a,Fnip1,Foxs1,Gata1,Gdf15,Gdnf,Gli1,Gsn,Hap1,Hmgb2,Hopx,Hormad1,Hspa2,…
P value	Biological process	GO.0051321	meiotic cell cycle	19	0.000168	ENSMUSP00000007250,ENSMUSP00000020252,ENSMUSP00000024972,ENSMUSP00000034371,ENSMUSP00000043085,ENSMUSP00000044123,ENSMUSP00000048592,ENSMUSP00000052272,ENSMUSP00000059056,ENSMUSP00000067324,ENSMUSP00000079306,ENSMUSP00000079909,ENSMUSP00000086582,ENSMUSP00000088303,ENSMUSP00000094174,ENSMUSP00000110412,ENSMUSP00000118994,ENSMUSP00000131871,ENSMUSP00000137079	Ccdc79,Ccnb3,Cpeb1,Dpep3,Hormad1,Hspa2,Mei1,Meiob,Msh5,Prdm9,Rad21l,Siah1a,Slc26a8,Spdya,Spo11,Sycp2,Sycp3,Syde1,Tex19.1
P value	Biological process	GO.0043066	negative regulation of apoptotic process	38	0.0288	ENSMUSP00000003066,ENSMUSP00000007757,ENSMUSP00000009241,ENSMUSP00000017841,ENSMUSP00000017881,ENSMUSP00000020252,ENSMUSP00000020543,ENSMUSP00000021796,ENSMUSP00000021922,ENSMUSP00000022744,ENSMUSP00000023779,ENSMUSP00000028663,ENSMUSP00000028672,ENSMUSP00000029625,ENSMUSP00000029846,ENSMUSP00000031320,ENSMUSP00000032066,ENSMUSP00000032949,ENSMUSP00000033502,ENSMUSP00000033673,ENSMUSP00000035075,…	Ada,Apoe,Ar,Cdkn2d,Chst11,Coro1a,Cpeb4,Creb3l1,Cxcr7,Cyr61,Edn1,Egr4,F2r,Fnip1,Gata1,Gdnf,Hmgb2,Jak3,Mdk,Mmp9,Msx2,Nono,Nr4a1,Pf4,Sct,Sfrp2,Six4,Smad6,Snai1,Sncb,Sycp2,Sycp3,Tbx1,Tdgf1,Tgfa,Tgfbr1,Twist1,Vnn1
P value	Biological process	GO.0042127	regulation of cell proliferation	67	0.000527	ENSMUSP00000000220,ENSMUSP00000000310,ENSMUSP00000000312,ENSMUSP00000000450,ENSMUSP00000000542,ENSMUSP00000000769,ENSMUSP00000003066,ENSMUSP00000005548,ENSMUSP00000007757,ENSMUSP00000009241,ENSMUSP00000015234,ENSMUSP00000017610,ENSMUSP00000017841,ENSMUSP00000019246,ENSMUSP00000021077,ENSMUSP00000021796,ENSMUSP00000021810,ENSMUSP00000021922,ENSMUSP00000022744,ENSMUSP00000022952,ENSMUSP00000023600,…	Acvrl1,Ada,Agap2,Aldh1a2,Aldh3a1,Apoe,Ar,Arx,Atxn1,Cck,Cd276,Cd3e,Cdh1,Cdh3,Cdkn2d,Cebpa,Chst11,Coro1a,Cxcr2,Cyr61,Dusp15,Edn1,Etv3,Etv4,Etv5,F2r,Gata1,Gdnf,Gjb6,Gli1,Hmgb2,Hmox1,Id4,Ins2,Jak3,Klf9,Mapk11,Msx2,Nr4a1,Osr2,Pemt,Pf4,Pkd2,Pparg,Prrx2,Ptgds,Ptges,Robo1,Rps4x,S100a11,Sall1,Serpine2,Serpinf1,Sfrp2,Six4,Slc9a3r1,Smad6,Spdya,Stx3,Tbx1,Tdgf1,Tenc1,Tgfa,Tgfbr1,Timp2,Twist1,Wfdc1
P value	Biological process	GO.0007283	spermatogenesis	33	0.000194	ENSMUSP00000005583,ENSMUSP00000006914,ENSMUSP00000020252,ENSMUSP00000023065,ENSMUSP00000023330,ENSMUSP00000024916,ENSMUSP00000025840,ENSMUSP00000026474,ENSMUSP00000027374,ENSMUSP00000042181,ENSMUSP00000044123,ENSMUSP00000046235,ENSMUSP00000047325,ENSMUSP00000047925,ENSMUSP00000048592,ENSMUSP00000052648,ENSMUSP00000058348,ENSMUSP00000058371,ENSMUSP00000059056,ENSMUSP00000059630,ENSMUSP00000063784,…	Adcyap1r1,Ar,Arntl,B4galnt1,Cldn11,Dmc1,Etv5,Fndc3a,Gal3st1,Gli1,Hmgb2,Hormad1,Hspa2,Lgr4,Lhcgr,Mei1,Morc1,Mtl5,Odf1,Pafah1b3,Prdm9,Prm2,Prm3,Rad21l,Siah1a,Slc26a8,Spo11,Sycp3,Tdrp,Tex19.1,Tnp1,Zfp541,Zfx
